# Supplementary material for: Sensitive and Quantitative Detection of MHC-I Displayed Neoepitopes Using a Semiautomated Workflow and TOMAHAQ Mass Spectrometry
Source: PubMed Central journal article supplement — Mol Cell Proteomics. 2021 Jun 12;20:100108. doi: 10.1016/j.mcpro.2021.100108 (PMC8255936; doi:10.1016/j.mcpro.2021.100108), 2021-06-12
Supplement: mmc2.pdf [file mmc2.pdf]

Data File : S:/MSD-07/2020/02-FEB/040220/1427/42454DAR001\_FR3 ->

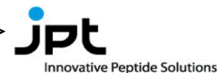

Injection Date : 04-Feb-20, 14:51:24  
Sample Name : 42454DAR001\_FR3  
Remarks : Baseline corrected  
Acq. Method : D:/METHODS/5-95-6M.M  
column used : Je\_559  
Analysis Method : C:/CHEM32/1/METHODS/JPT-LCMS.M

Sample Info : 42454\_001-Dr. Martine Darwish H-EVLAFAIL-OH

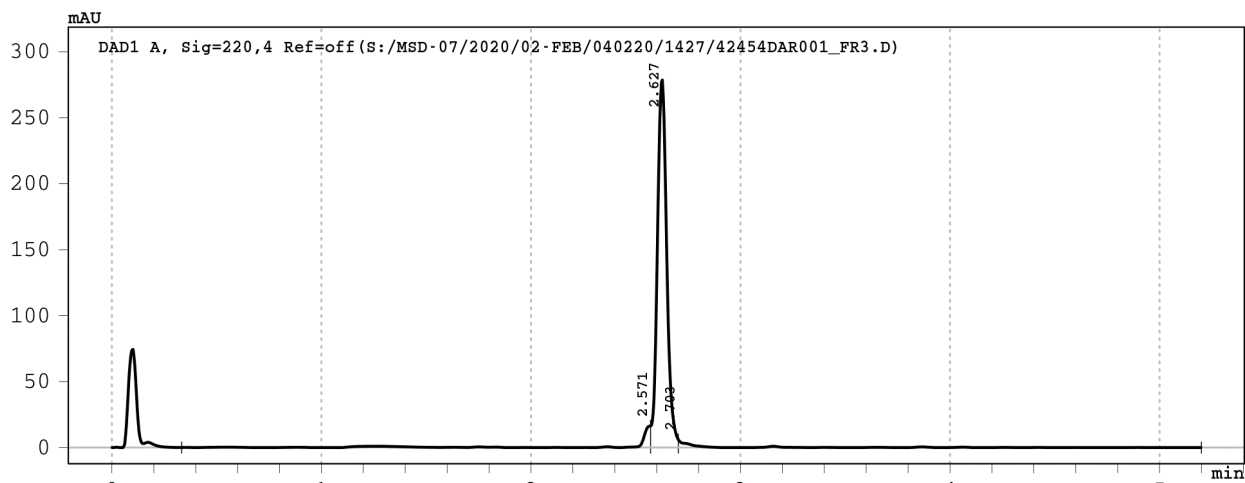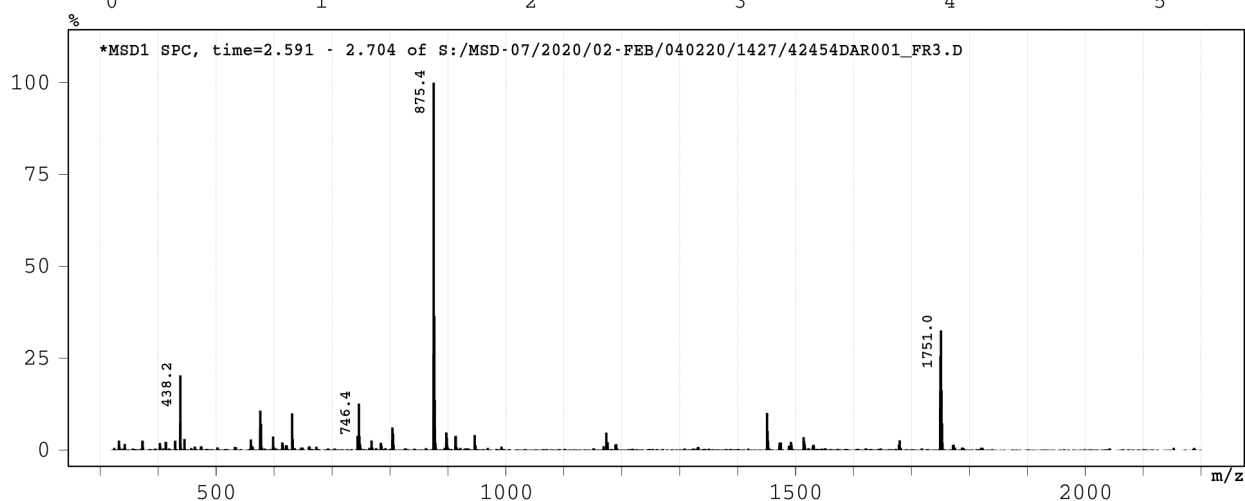

Signal 1: DAD1 A, Sig=220,4 Ref=off

| Peak # | RT [min] | Width [min] | Area  | Area % |
|--------|----------|-------------|-------|--------|
| 1      | 2.571    | 2.24        | 60.2  | 6.3    |
| 2      | 2.627    | 0.13        | 866.1 | 90.8   |
| 3      | 2.703    | 2.50        | 27.6  | 2.9    |

Data File : S:/MSD-07/2020/02-FEB/040220/1427/42454DAR002\_FR1->  
 Injection Date : 04-Feb-20, 14:59:48  
 Sample Name : 42454DAR002\_FR11-12  
 Remarks : Baseline corrected  
 Acq. Method : D:/METHODS/5-95-6M.M  
 column used : Je\_559  
 Analysis Method : C:/CHEM32/1/METHODS/JPT-LCMS.M

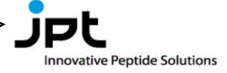

Sample Info : 42454\_002-Dr. Martine Darwish H-ASMTNMELM-OH

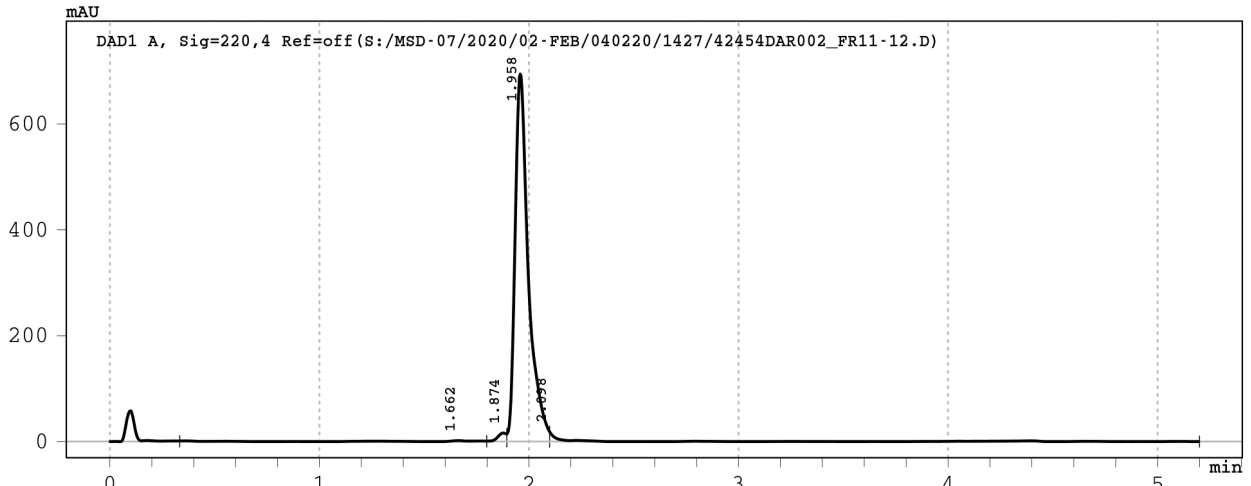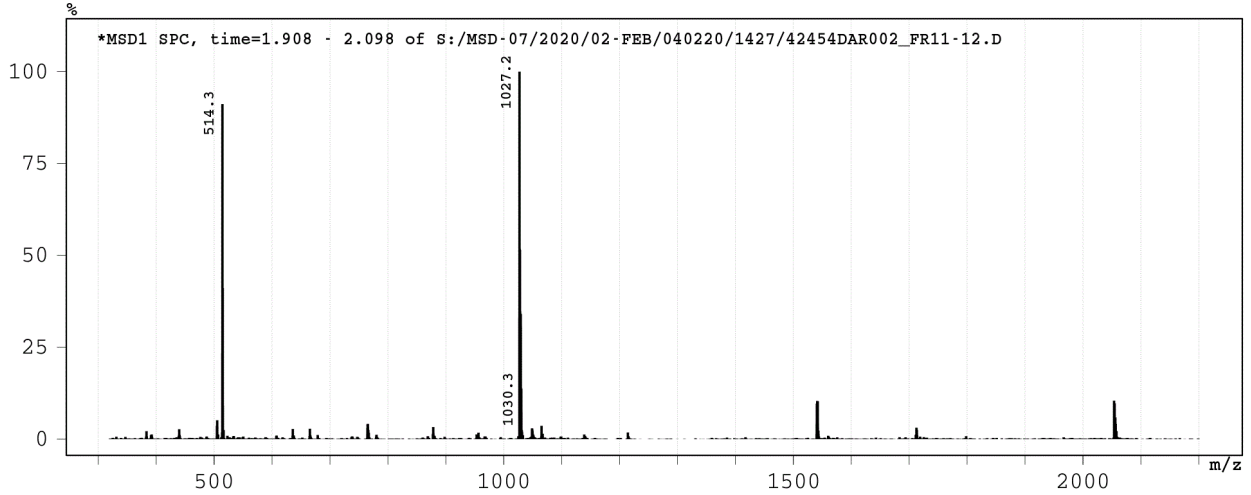

Signal 1: DAD1 A, Sig=220,4 Ref=off

| Peak # | RT [min] | Width [min] | Area   | Area % |
|--------|----------|-------------|--------|--------|
| 1      | 1.662    | 1.46        | 33.5   | 1.0    |
| 2      | 1.874    | 0.10        | 45.2   | 1.4    |
| 3      | 1.958    | 0.20        | 3067.8 | 95.0   |
| 4      | 2.098    | 3.10        | 82.9   | 2.6    |

Data File : S:/MSD-07/2020/02-FEB/040220/1427/42454DAR003\_FR1->



Injection Date : 04-Feb-20, 15:08:12  
Sample Name : 42454DAR003\_FR19-21  
Remarks : Baseline corrected  
Acq. Method : D:/METHODS/5-95-6M.M  
column used : Je\_559  
Analysis Method : C:/CHEM32/1/METHODS/JPT-LCMS.M

Sample Info : 42454\_003-Dr. Martine Darwish H-ANFQLCPL-OH

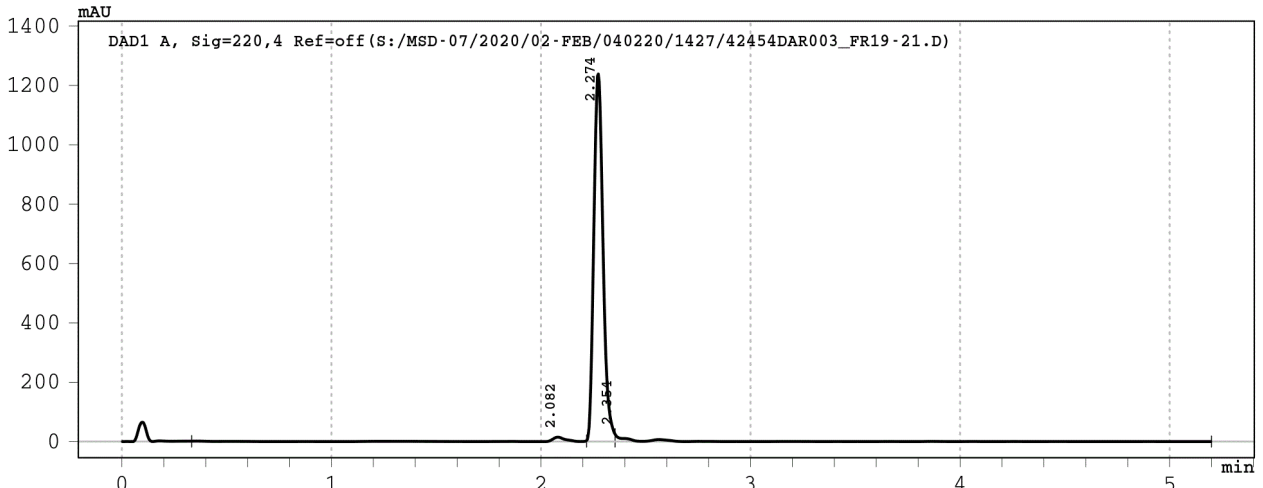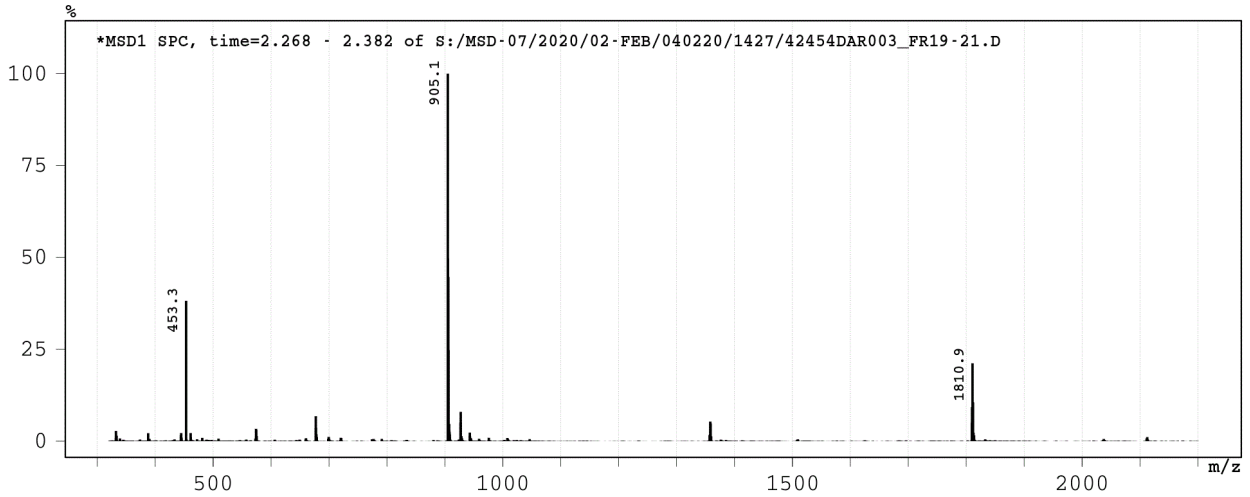

Signal 1: DAD1 A, Sig=220,4 Ref=off

| Peak # | RT [min] | Width [min] | Area   | Area % |
|--------|----------|-------------|--------|--------|
| 1      | 2.082    | 1.88        | 89.2   | 2.2    |
| 2      | 2.274    | 0.14        | 3803.6 | 95.1   |
| 3      | 2.354    | 2.85        | 108.0  | 2.7    |

Data File : S:/MSD-07/2020/02-FEB/040220/1427/42454DAR004\_FR2 ->



Injection Date : 04-Feb-20, 15:16:36  
Sample Name : 42454DAR004\_FR28  
Remarks : Baseline corrected  
Acq. Method : D:/METHODS/5-95-6M.M  
column used : Je\_559  
Analysis Method : C:/CHEM32/1/METHODS/JPT-LCMS.M

Sample Info : 42454\_004-Dr. Martine Darwish H-FSFFNPKCLL-OH

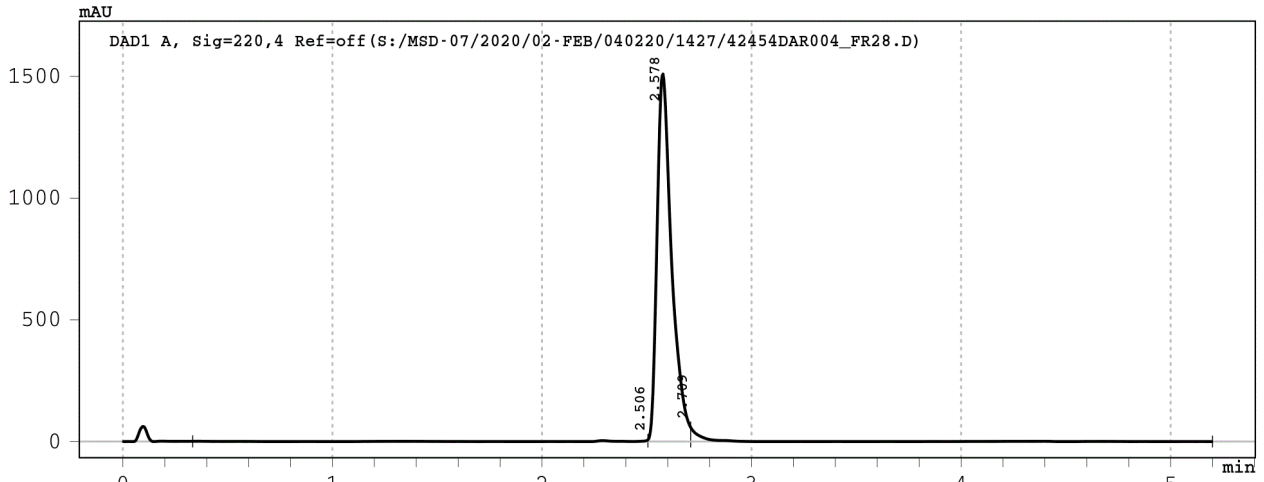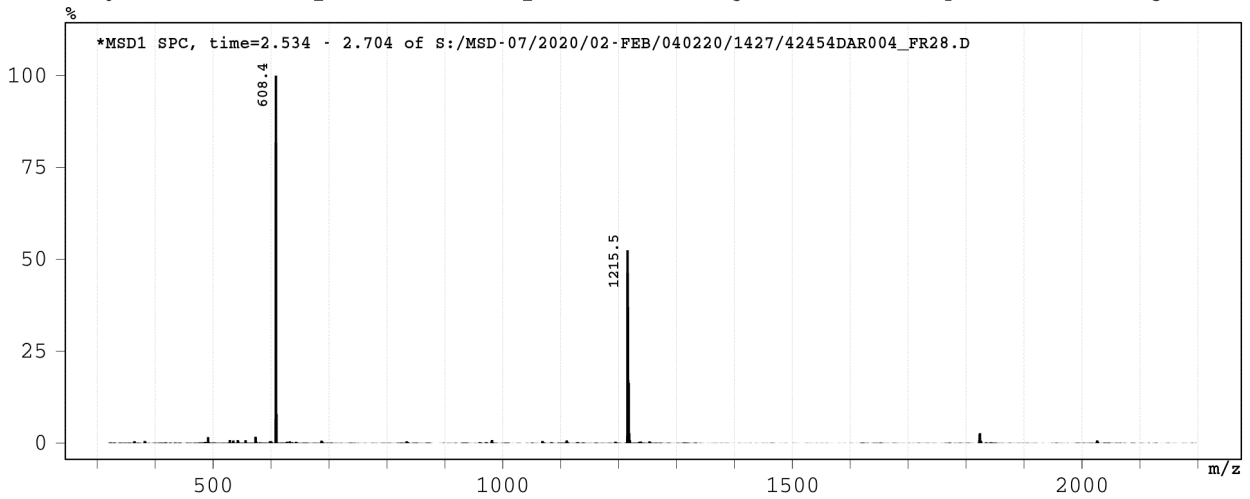

Signal 1: DAD1 A, Sig=220,4 Ref=off

| Peak # | RT [min] | Width [min] | Area   | Area % |
|--------|----------|-------------|--------|--------|
| 1      | 2.506    | 2.17        | 56.8   | 0.7    |
| 2      | 2.578    | 0.20        | 7321.3 | 96.6   |
| 3      | 2.709    | 2.49        | 201.4  | 2.7    |

Data File : S:/MSD-07/2020/02-FEB/040220/1427/42454DAR005\_FR4->  
 Injection Date : 04-Feb-20, 15:25:00  
 Sample Name : 42454DAR005\_FR42-43  
 Remarks : Baseline corrected  
 Acq. Method : D:/METHODS/5-95-6M.M  
 column used : Je\_559  
 Analysis Method : C:/CHEM32/1/METHODS/JPT-LCMS.M



Sample Info : 42454\_005-Dr. Martine Darwish H-STYVIPRL-OH

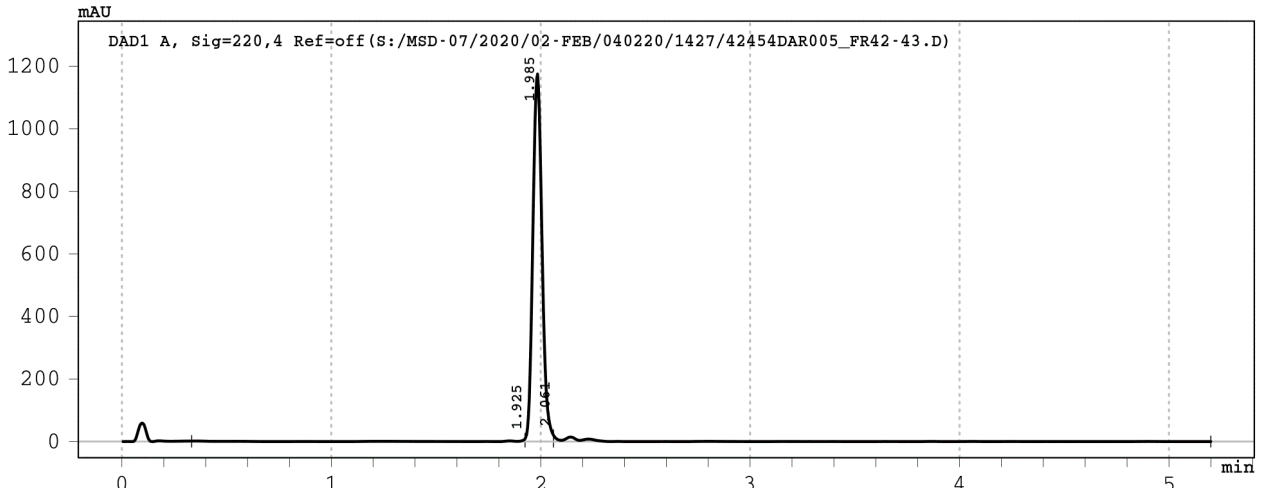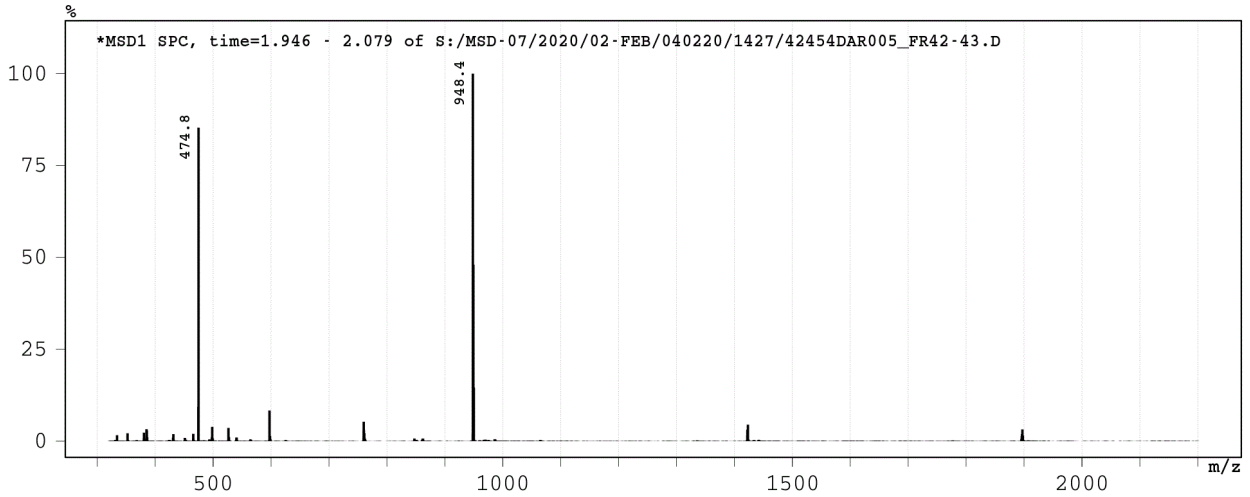

Signal 1: DAD1 A, Sig=220,4 Ref=off

| Peak # | RT [min] | Width [min] | Area   | Area % |
|--------|----------|-------------|--------|--------|
| 1      | 1.925    | 1.59        | 40.8   | 1.1    |
| 2      | 1.985    | 0.14        | 3582.7 | 95.8   |
| 3      | 2.061    | 3.14        | 115.1  | 3.1    |

Data File : S:/MSD-07/2020/02-FEB/040220/1427/42454DAR006\_FR5->



Injection Date : 04-Feb-20, 15:33:22  
Sample Name : 42454DAR006\_FR56  
Remarks : Baseline corrected  
Acq. Method : D:/METHODS/5-95-6M.M  
column used : Je\_559  
Analysis Method : C:/CHEM32/1/METHODS/JPT-LCMS.M

Sample Info : 42454\_006-Dr. Martine Darwish H-YTICNPCVPV-OH

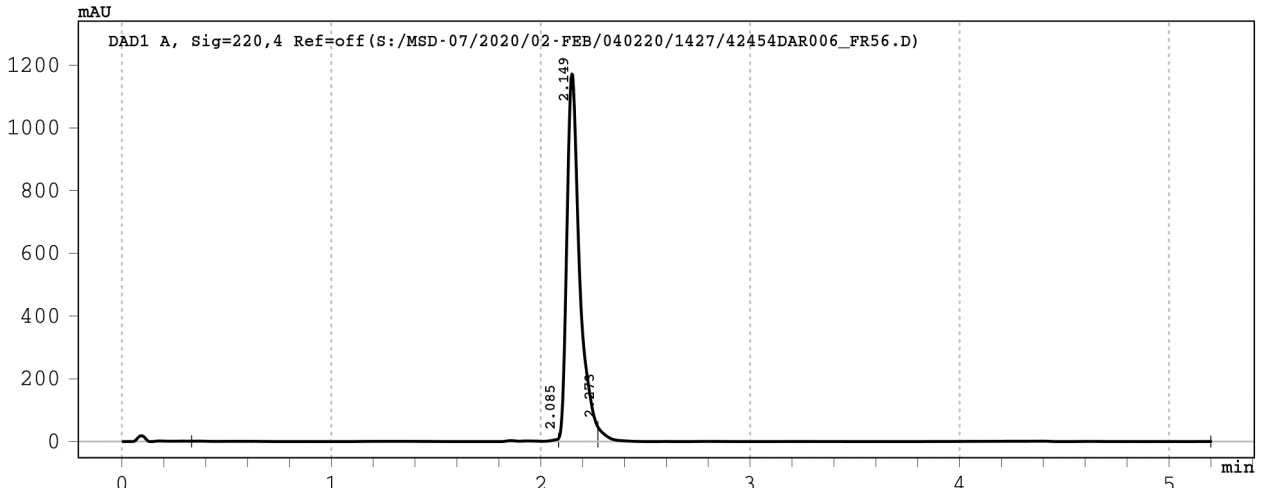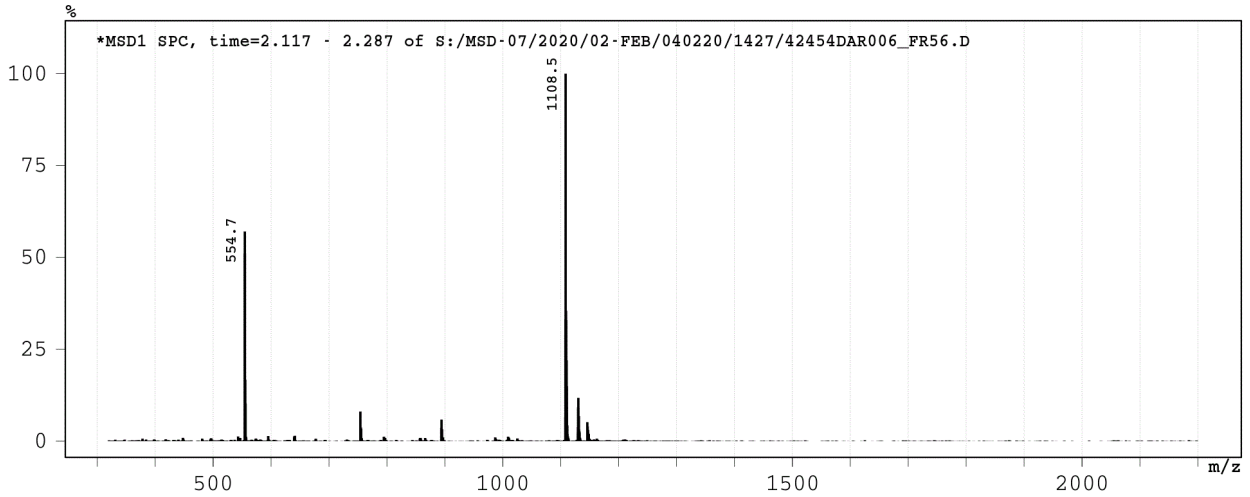

Signal 1: DAD1 A, Sig=220,4 Ref=off

| Peak # | RT [min] | Width [min] | Area   | Area % |
|--------|----------|-------------|--------|--------|
| 1      | 2.085    | 1.75        | 62.6   | 1.2    |
| 2      | 2.149    | 0.19        | 4963.1 | 95.9   |
| 3      | 2.273    | 2.93        | 148.1  | 2.9    |

Data File : S:/MSD-07/2020/02-FEB/040220/1427/42454DAR007\_FR6->



Injection Date : 04-Feb-20, 15:41:47  
Sample Name : 42454DAR007\_FR68-70  
Remarks : Baseline corrected  
Acq. Method : D:/METHODS/5-95-6M.M  
column used : Je\_559  
Analysis Method : C:/CHEM32/1/METHODS/JPT-LCMS.M

Sample Info : 42454\_007-Dr. Martine Darwish H-ASYNGFLPV-OH

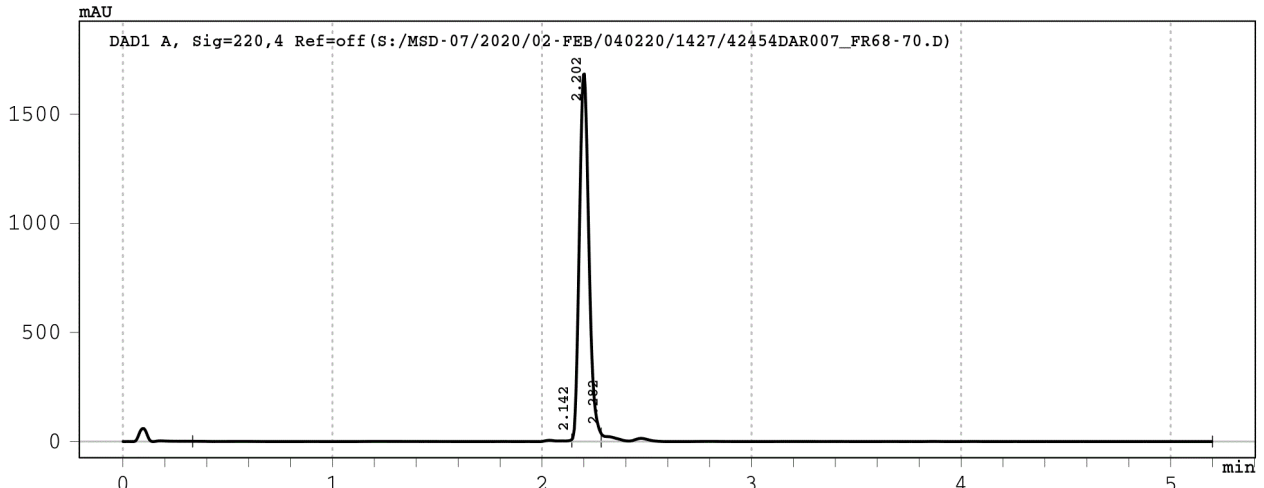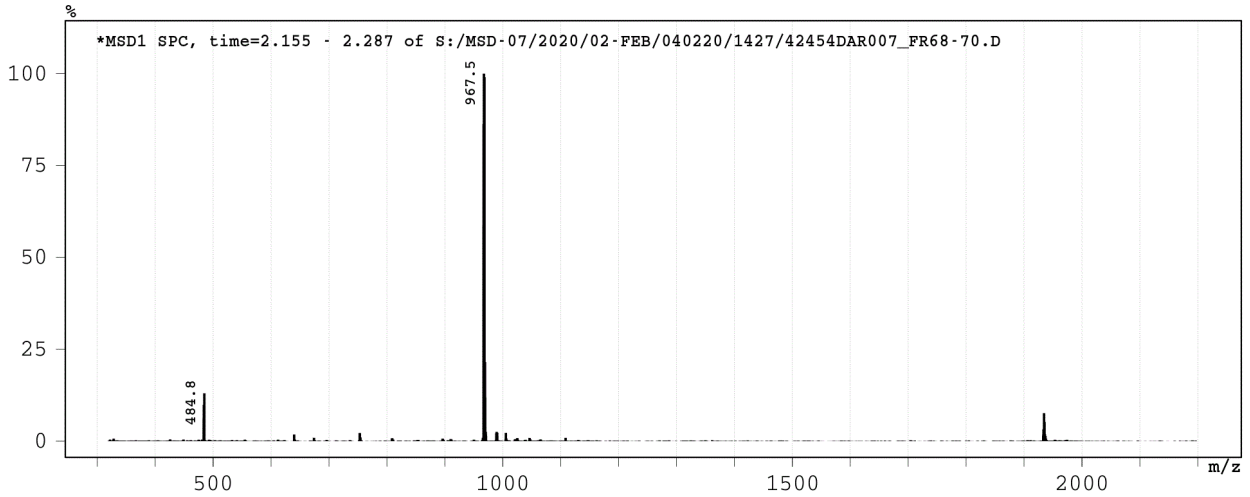

Signal 1: DAD1 A, Sig=220,4 Ref=off

| Peak # | RT [min] | Width [min] | Area   | Area % |
|--------|----------|-------------|--------|--------|
| 1      | 2.142    | 1.81        | 51.9   | 0.9    |
| 2      | 2.202    | 0.14        | 5359.4 | 95.5   |
| 3      | 2.282    | 2.92        | 200.0  | 3.6    |

Data File : S:/MSD-07/2020/02-FEB/140220/1435/42454DAR008\_FR7->



Injection Date : 14-Feb-20, 23:28:03  
Sample Name : 42454DAR008\_FR7-9  
Remarks : Baseline corrected  
Acq. Method : D:/METHODS/5-95-6M.M  
column used : Je\_559  
Analysis Method : C:/CHEM32/1/METHODS/JPT-LCMS.M

Sample Info : 42454\_008-Dr. Martine Darwish H-FVMDYIPV-OH

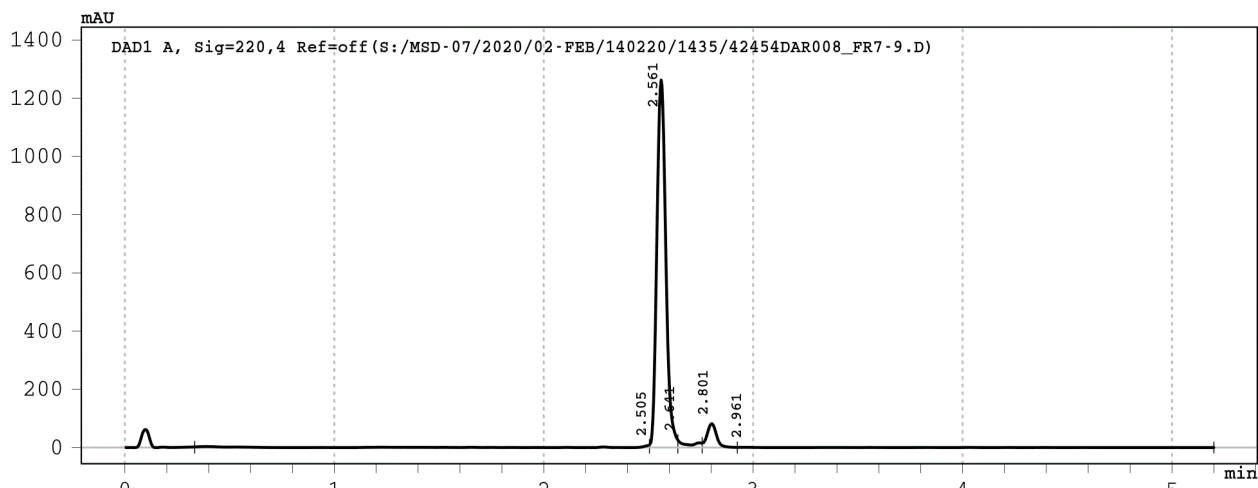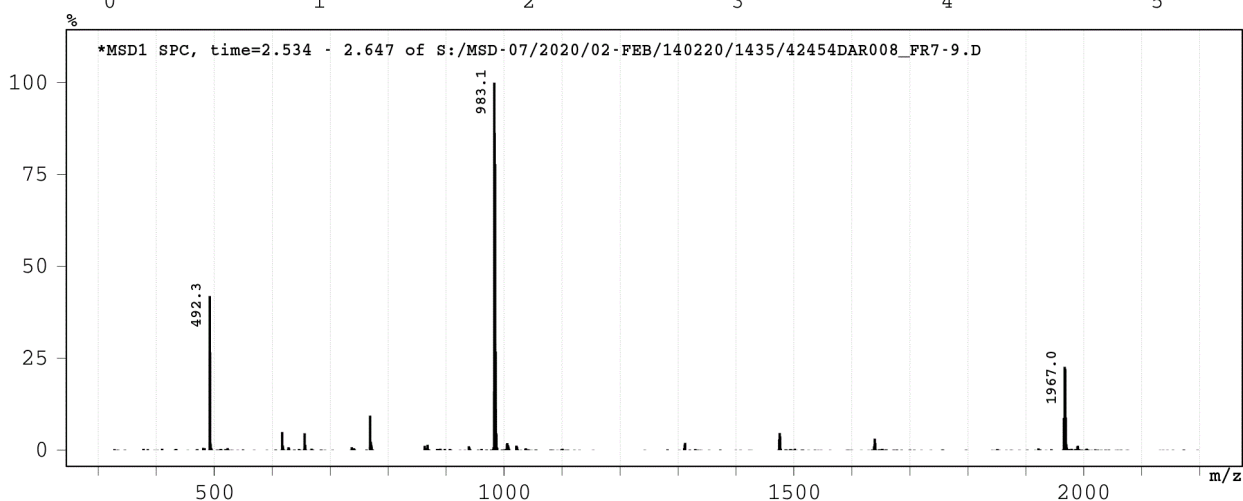

Signal 1: DAD1 A, Sig=220,4 Ref=off

| Peak # | RT [min] | Width [min] | Area   | Area % |
|--------|----------|-------------|--------|--------|
| 1      | 2.505    | 2.17        | 84.8   | 2.0    |
| 2      | 2.561    | 0.14        | 3760.5 | 89.4   |
| 3      | 2.641    | 0.12        | 90.3   | 2.1    |
| 4      | 2.801    | 0.17        | 258.9  | 6.2    |
| 5      | 2.961    | 2.28        | 12.6   | 0.3    |



Data File : S:/MSD-07/2020/02-FEB/070220/1430/42454DAR009\_FR2->



Injection Date : 07-Feb-20, 13:12:50  
Sample Name : 42454DAR009\_FR2-4  
Remarks : Baseline corrected  
Acq. Method : D:/METHODS/5-95-6M.M  
column used : Je\_559  
Analysis Method : C:/CHEM32/1/METHODS/JPT-LCMS.M

Sample Info : 42454\_009-Dr. Martine Darwish H-QSYVPAPL-OH

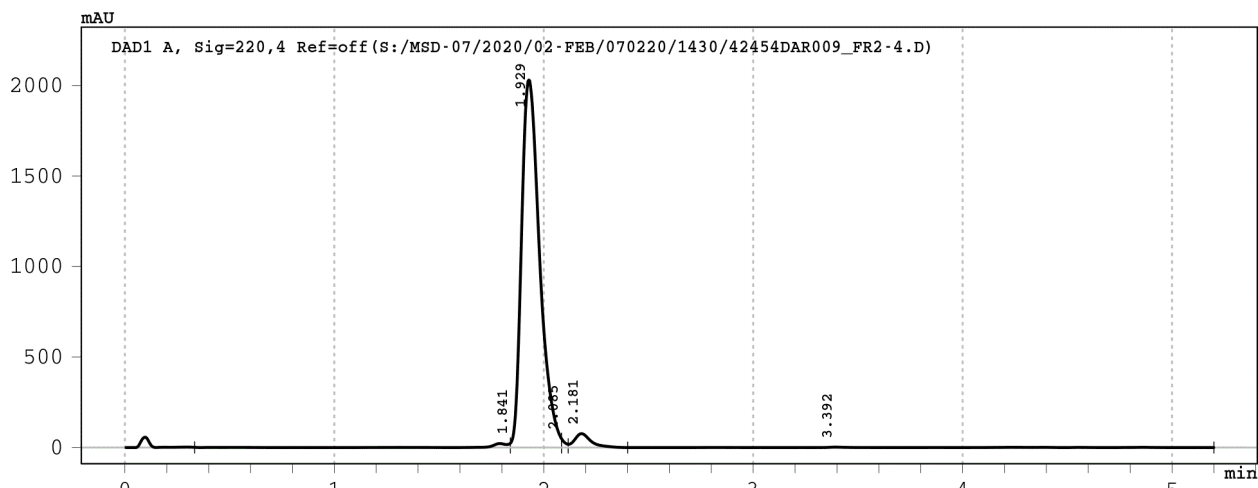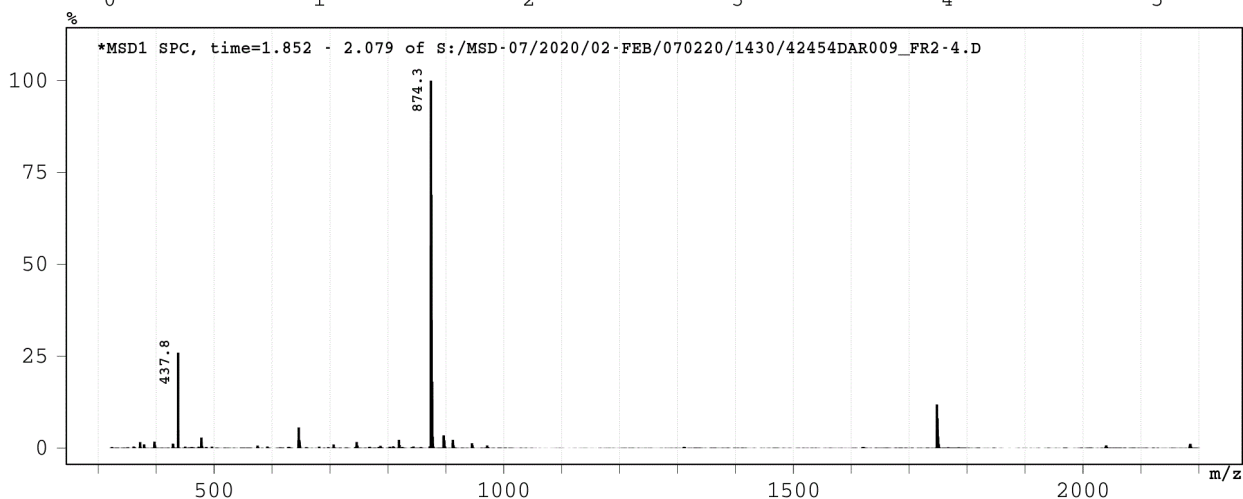

Signal 1: DAD1 A, Sig=220,4 Ref=off

| Peak # | RT [min] | Width [min] | Area    | Area % |
|--------|----------|-------------|---------|--------|
| 1      | 1.841    | 1.51        | 131.5   | 1.0    |
| 2      | 1.929    | 0.24        | 12220.0 | 94.9   |
| 3      | 2.085    | 0.03        | 56.0    | 0.4    |
| 4      | 2.181    | 0.28        | 422.9   | 3.3    |
| 5      | 3.392    | 2.80        | 46.2    | 0.4    |

Data File : S:/MSD-07/2020/02-FEB/040220/1427/42454DAR010\_FR8->  
 Injection Date : 04-Feb-20, 15:50:10  
 Sample Name : 42454DAR010\_FR81-82  
 Remarks : Baseline corrected  
 Acq. Method : D:/METHODS/5-95-6M.M  
 column used : Je\_559  
 Analysis Method : C:/CHEM32/1/METHODS/JPT-LCMS.M



Sample Info : 42454\_010-Dr. Martine Darwish H-KNHWNSTML-OH

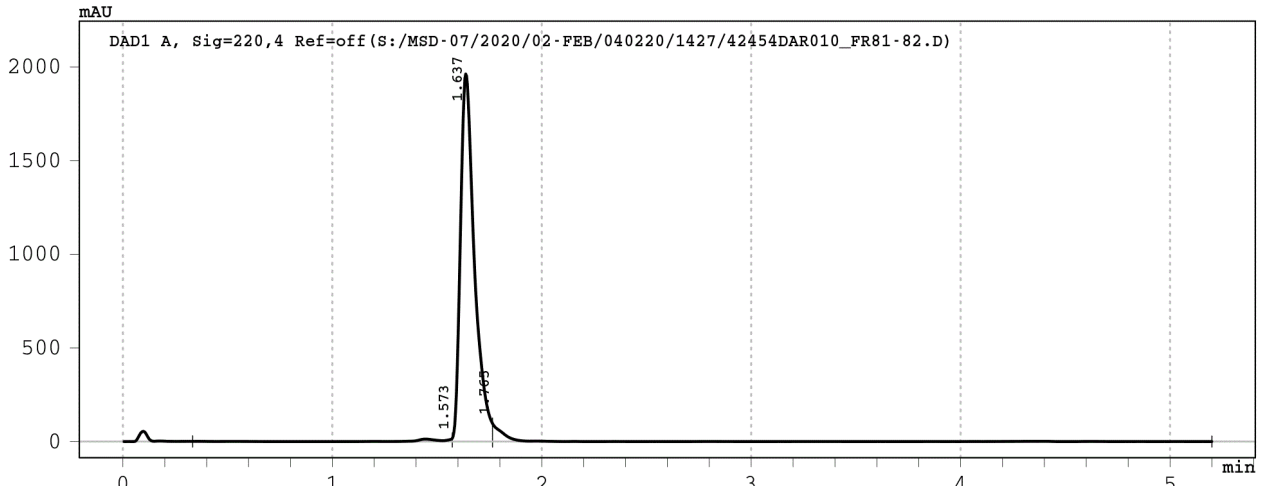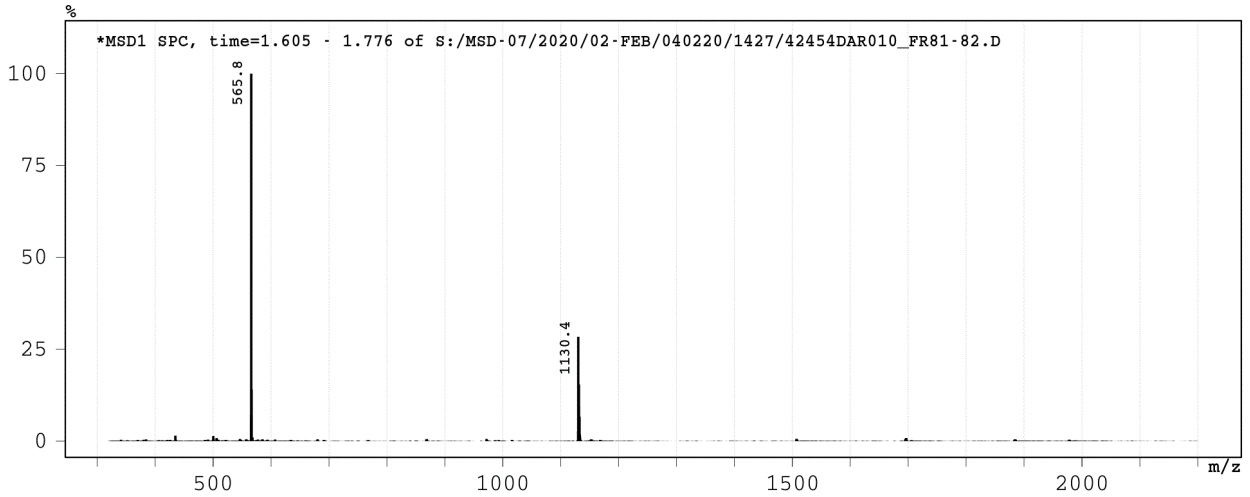

Signal 1: DAD1 A, Sig=220,4 Ref=off

| Peak # | RT [min] | Width [min] | Area   | Area % |
|--------|----------|-------------|--------|--------|
| 1      | 1.573    | 1.24        | 115.7  | 1.2    |
| 2      | 1.637    | 0.19        | 9130.6 | 95.2   |
| 3      | 1.765    | 3.44        | 348.1  | 3.6    |

Data File : S:/MSD-07/2020/02-FEB/070220/1430/42454DAR011\_FR1->  
Injection Date : 07-Feb-20, 13:21:13  
Sample Name : 42454DAR011\_FR18-21  
Remarks : Baseline corrected  
Acq. Method : D:/METHODS/5-95-6M.M  
column used : Je\_559  
Analysis Method : C:/CHEM32/1/METHODS/JPT-LCMS.M



Sample Info : 42454\_011-Dr. Martine Darwish H-FMLPFFMAF-OH

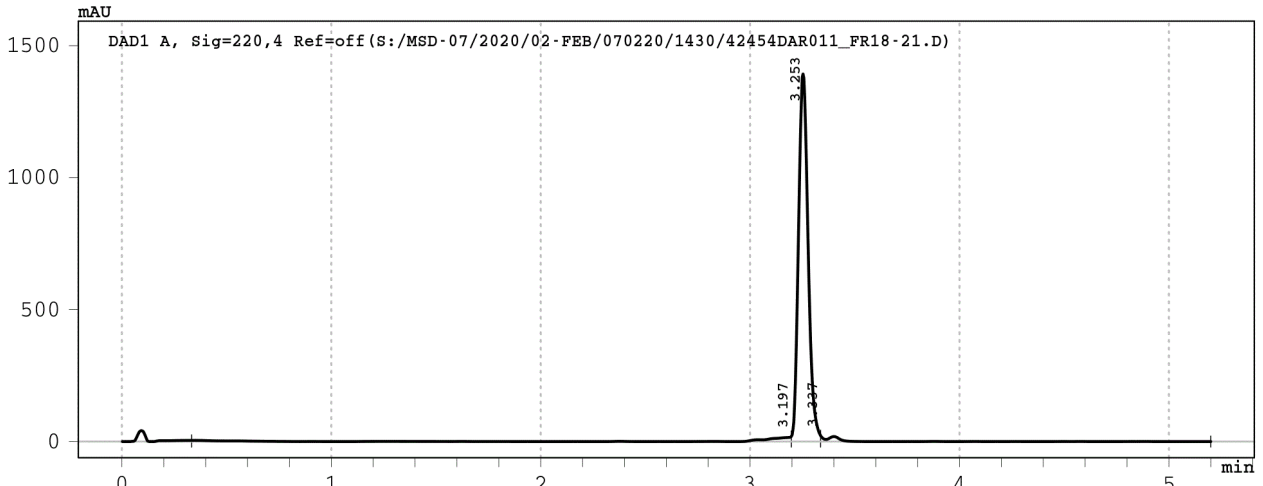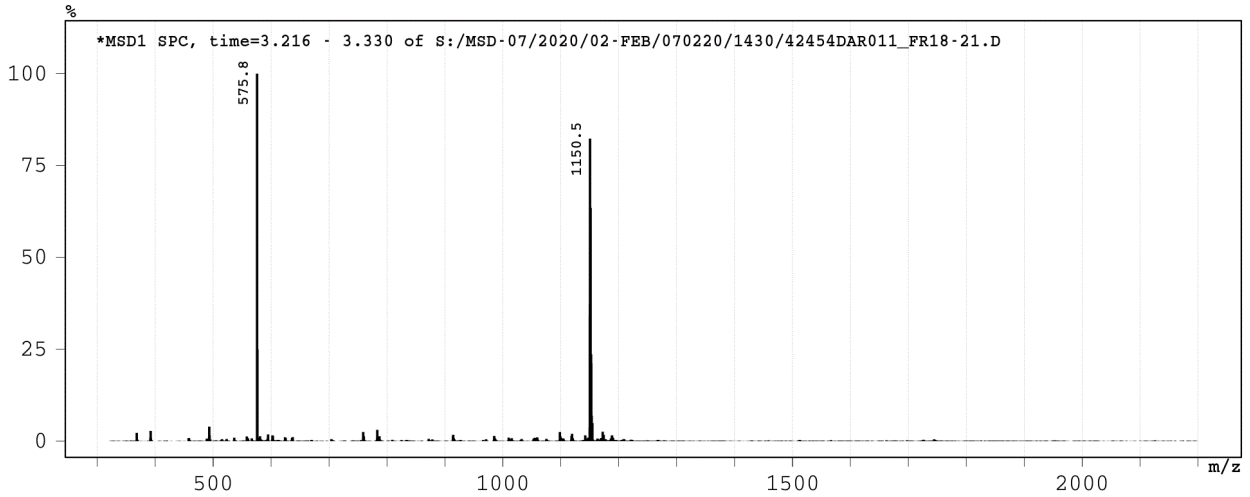

Signal 1: DAD1 A, Sig=220,4 Ref=off

| Peak # | RT [min] | Width [min] | Area   | Area % |
|--------|----------|-------------|--------|--------|
| 1      | 3.197    | 2.86        | 202.8  | 4.3    |
| 2      | 3.253    | 0.14        | 4463.7 | 93.8   |
| 3      | 3.337    | 1.86        | 93.4   | 2.0    |

Data File : S:/MSD-07/2020/02-FEB/040220/1427/42454DAR012\_FR1->  
 Injection Date : 04-Feb-20, 15:58:34  
 Sample Name : 42454DAR012\_FR17-18  
 Remarks : Baseline corrected  
 Acq. Method : D:/METHODS/5-95-6M.M  
 column used : Je\_559  
 Analysis Method : C:/CHEM32/1/METHODS/JPT-LCMS.M



Sample Info : 42454\_012-Dr. Martine Darwish H-FVIDFKPL-OH

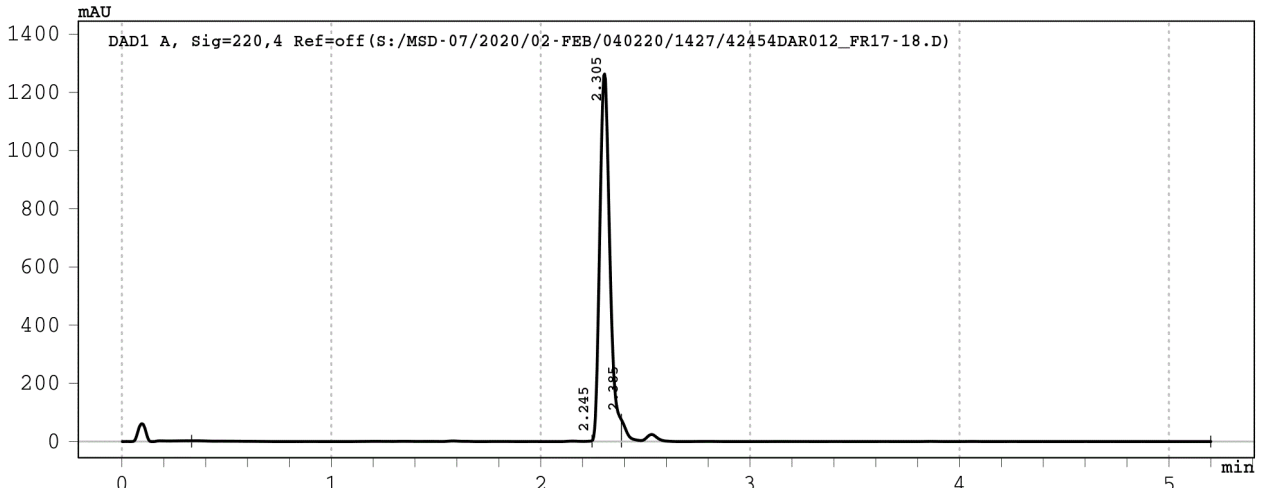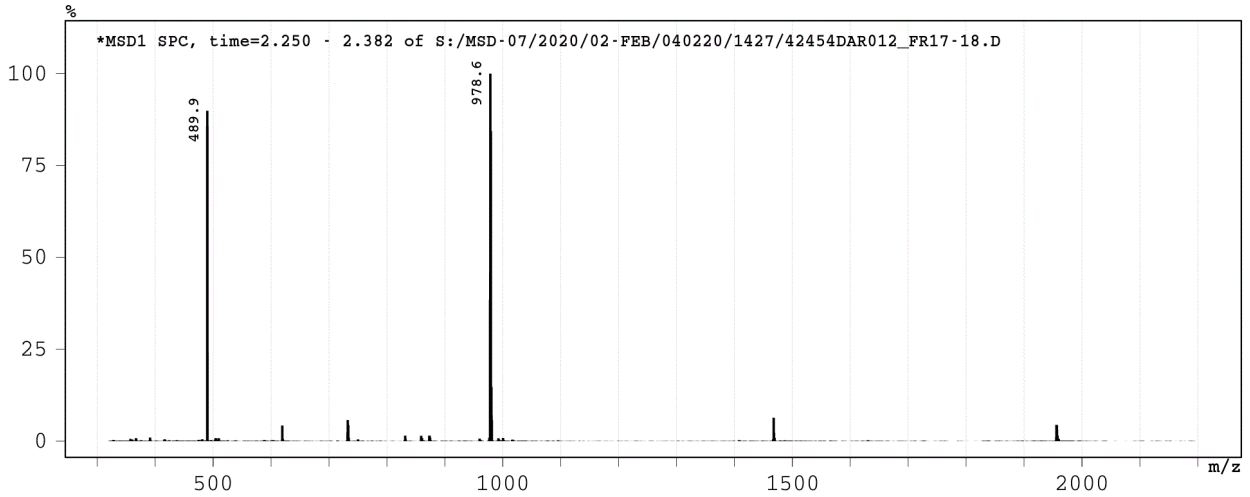

Signal 1: DAD1 A, Sig=220,4 Ref=off

| Peak # | RT [min] | Width [min] | Area   | Area % |
|--------|----------|-------------|--------|--------|
| 1      | 2.245    | 1.91        | 60.4   | 1.3    |
| 2      | 2.305    | 0.14        | 4217.8 | 93.7   |
| 3      | 2.385    | 2.81        | 224.1  | 5.0    |

Data File : S:/MSD-07/2020/02-FEB/040220/1427/42454DAR013\_FR3->



Injection Date : 04-Feb-20, 16:06:56  
Sample Name : 42454DAR013\_FR36-37  
Remarks : Baseline corrected  
Acq. Method : D:/METHODS/5-95-6M.M  
column used : Je\_559  
Analysis Method : C:/CHEM32/1/METHODS/JPT-LCMS.M

Sample Info : 42454\_013-Dr. Martine Darwish H-CMAFWIPFI-OH

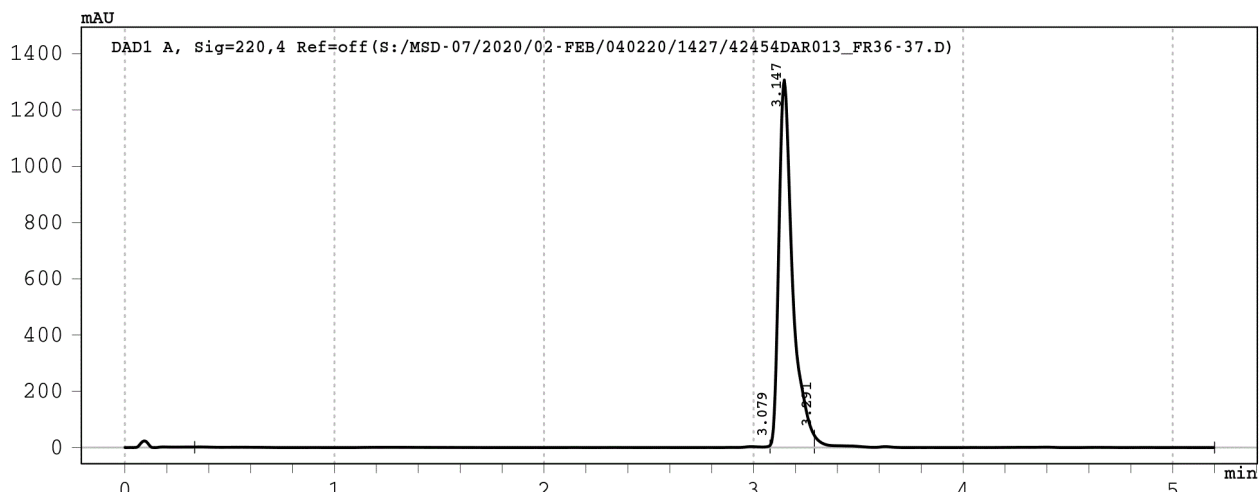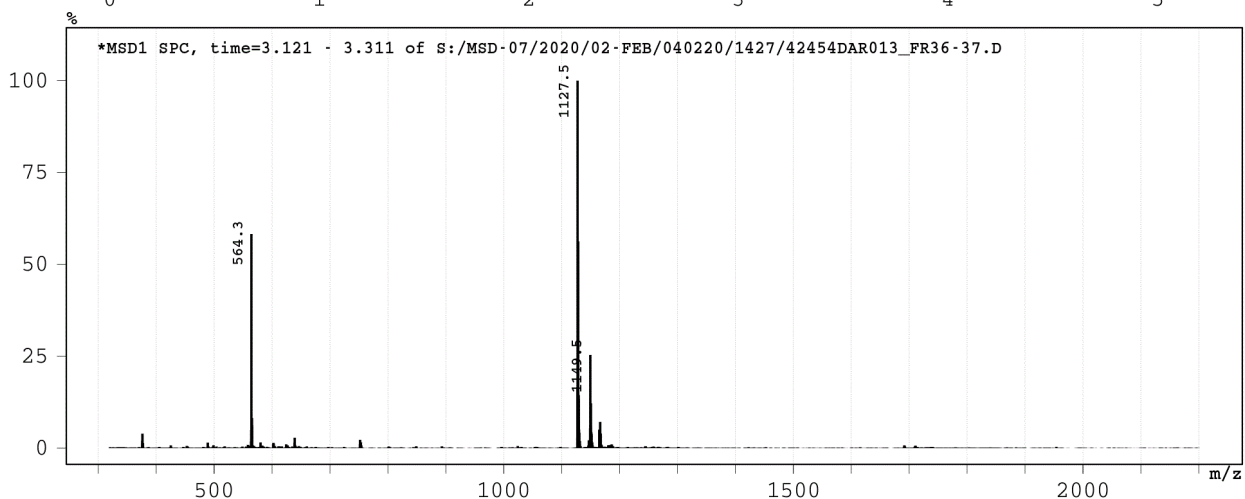

Signal 1: DAD1 A, Sig=220,4 Ref=off

| Peak # | RT [min] | Width [min] | Area   | Area % |
|--------|----------|-------------|--------|--------|
| 1      | 3.079    | 2.75        | 67.2   | 1.1    |
| 2      | 3.147    | 0.21        | 5937.5 | 96.2   |
| 3      | 3.291    | 1.91        | 170.4  | 2.8    |

Data File : S:/MSD-07/2020/02-FEB/040220/1427/42454DAR014\_FR5->



Injection Date : 04-Feb-20, 16:15:19  
Sample Name : 42454DAR014\_FR55-56  
Remarks : Baseline corrected  
Acq. Method : D:/METHODS/5-95-6M.M  
column used : Je\_559  
Analysis Method : C:/CHEM32/1/METHODS/JPT-LCMS.M

Sample Info : 42454\_014-Dr. Martine Darwish H-VNSIHALL-OH

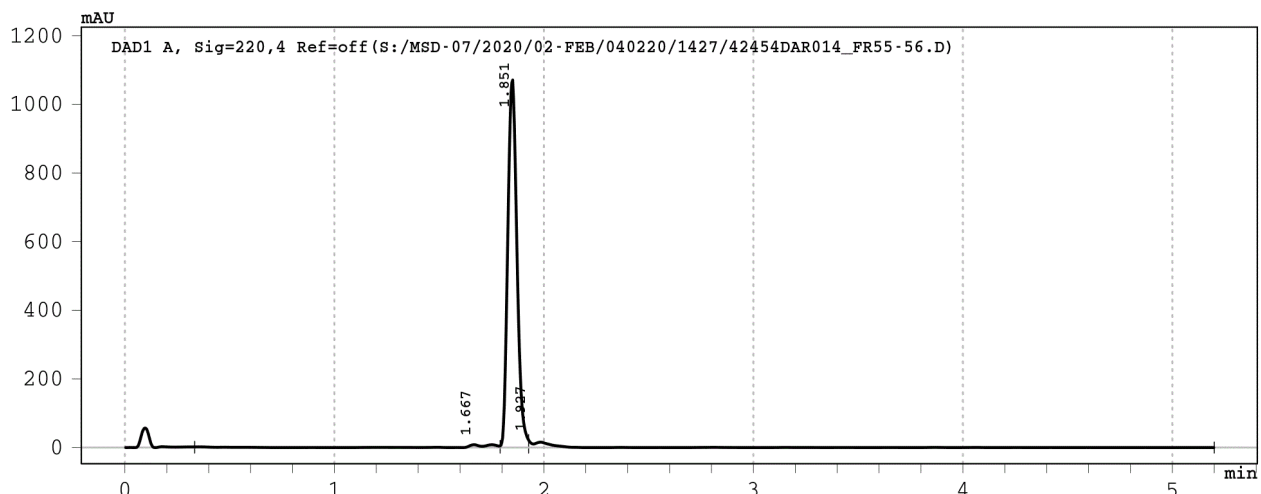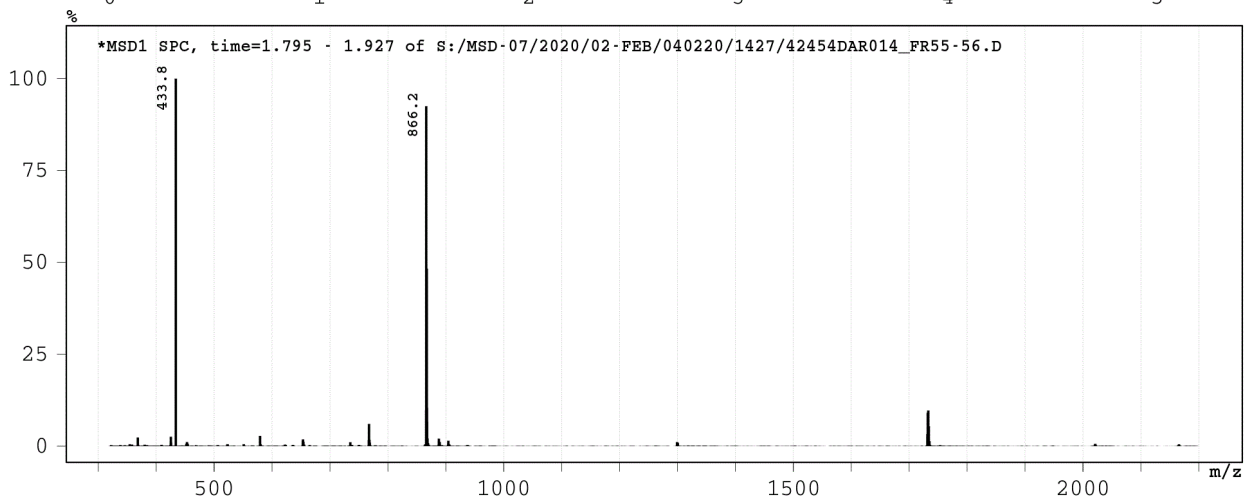

Signal 1: DAD1 A, Sig=220,4 Ref=off

| Peak # | RT [min] | Width [min] | Area   | Area % |
|--------|----------|-------------|--------|--------|
| 1      | 1.667    | 1.46        | 83.7   | 2.4    |
| 2      | 1.851    | 0.14        | 3274.4 | 94.2   |
| 3      | 1.927    | 3.27        | 117.2  | 3.4    |

Data File : S:/MSD-07/2020/02-FEB/040220/1427/42454DAR015\_FR6 ->  
 Injection Date : 04-Feb-20, 16:23:43  
 Sample Name : 42454DAR015\_FR60  
 Remarks : Baseline corrected  
 Acq. Method : D:/METHODS/5-95-6M.M  
 column used : Je\_559  
 Analysis Method : C:/CHEM32/1/METHODS/JPT-LCMS.M



Sample Info : 42454\_015-Dr. Martine Darwish H-AQLANDVVL-OH

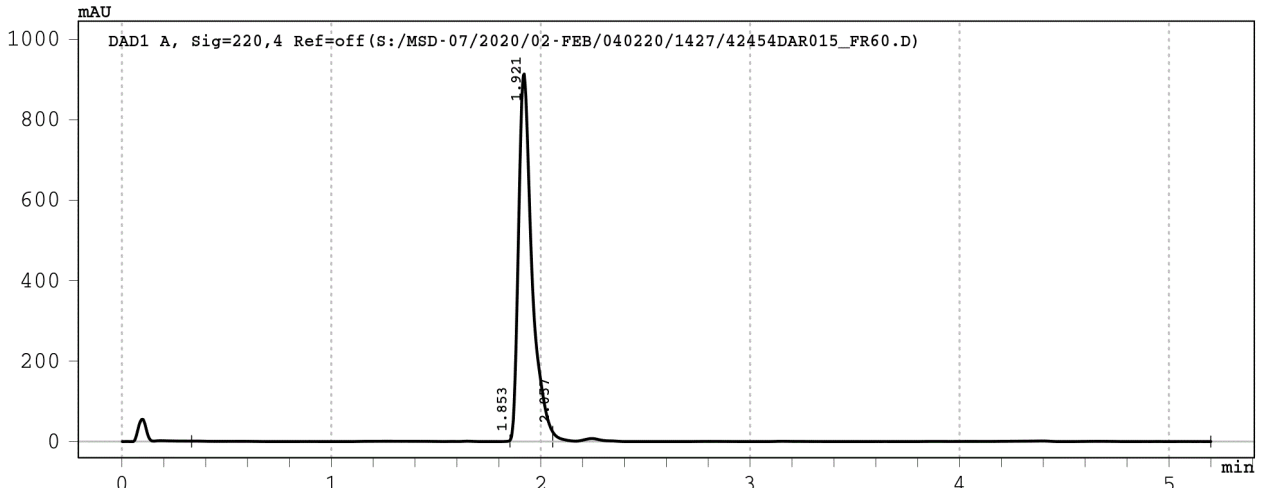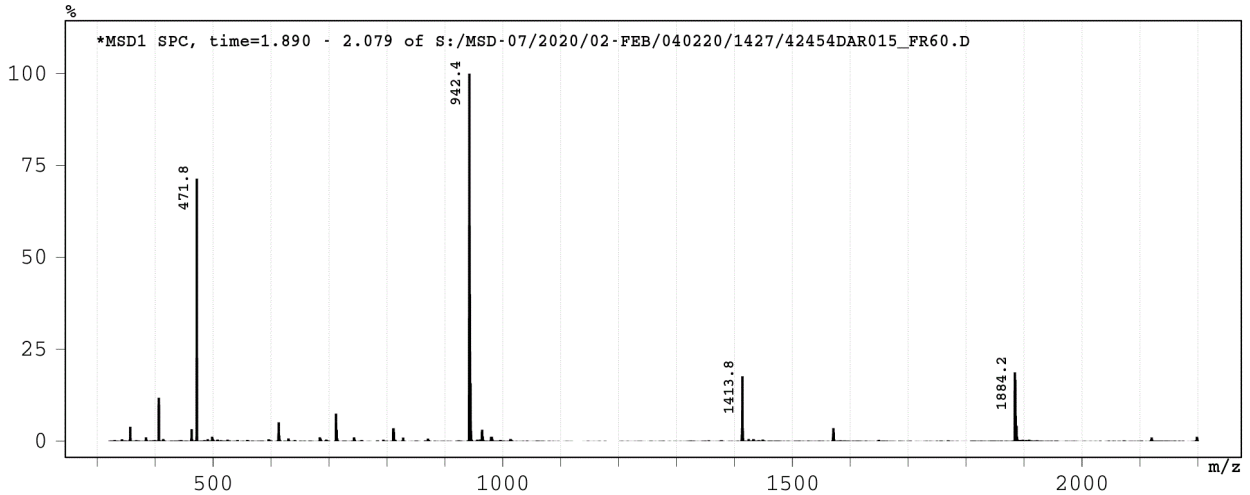

Signal 1: DAD1 A, Sig=220,4 Ref=off

| Peak # | RT [min] | Width [min] | Area   | Area % |
|--------|----------|-------------|--------|--------|
| 1      | 1.853    | 1.52        | 30.3   | 0.7    |
| 2      | 1.921    | 0.20        | 4085.3 | 96.4   |
| 3      | 2.057    | 3.14        | 121.8  | 2.9    |

Data File : S:/MSD-07/2020/02-FEB/040220/1427/42454DAR016\_FR7->  
 Injection Date : 04-Feb-20, 16:32:07  
 Sample Name : 42454DAR016\_FR71-72  
 Remarks : Baseline corrected  
 Acq. Method : D:/METHODS/5-95-6M.M  
 column used : Je\_559  
 Analysis Method : C:/CHEM32/1/METHODS/JPT-LCMS.M

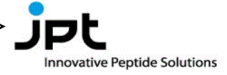

Sample Info : 42454\_016-Dr. Martine Darwish H-KILTFDRL-OH

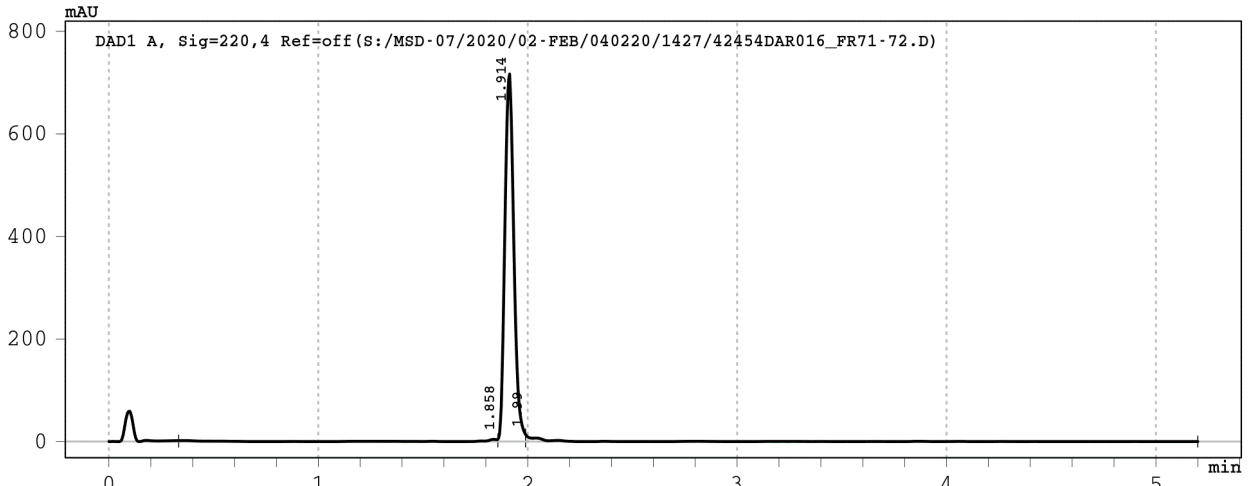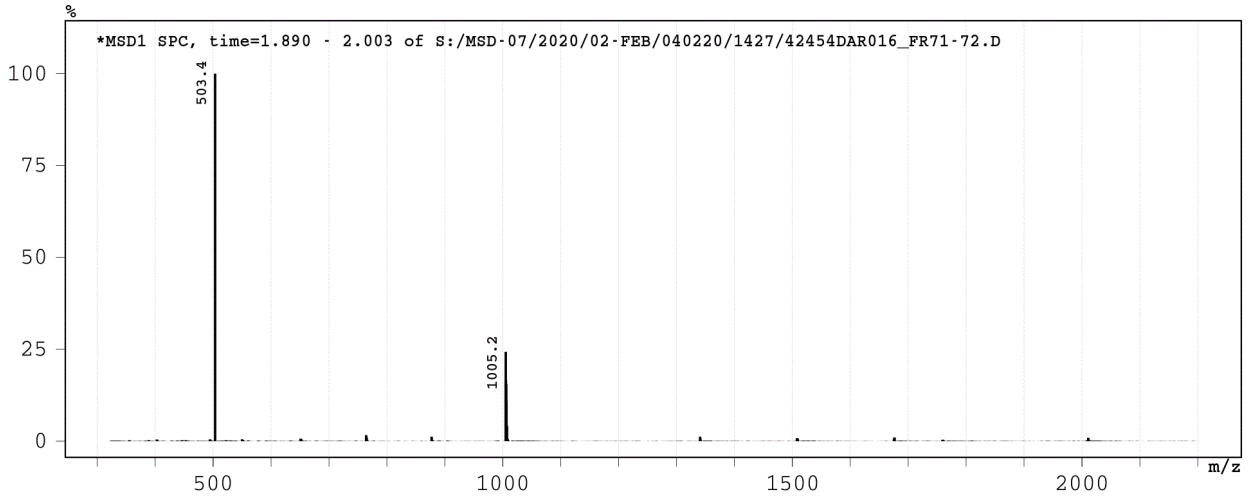

Signal 1: DAD1 A, Sig=220,4 Ref=off

| Peak # | RT [min] | Width [min] | Area   | Area % |
|--------|----------|-------------|--------|--------|
| 1      | 1.858    | 1.52        | 40.9   | 1.8    |
| 2      | 1.914    | 0.13        | 2143.4 | 95.4   |
| 3      | 1.990    | 3.21        | 61.7   | 2.7    |



Data File : S:/MSD-07/2020/02-FEB/040220/1427/42454DAR017\_FR7->  
 Injection Date : 04-Feb-20, 16:40:33  
 Sample Name : 42454DAR017\_FR79  
 Remarks : Baseline corrected  
 Acq. Method : D:/METHODS/5-95-6M.M  
 column used : Je\_559  
 Analysis Method : C:/CHEM32/1/METHODS/JPT-LCMS.M



Sample Info : 42454\_017-Dr. Martine Darwish H-VMMSAEAV-OH

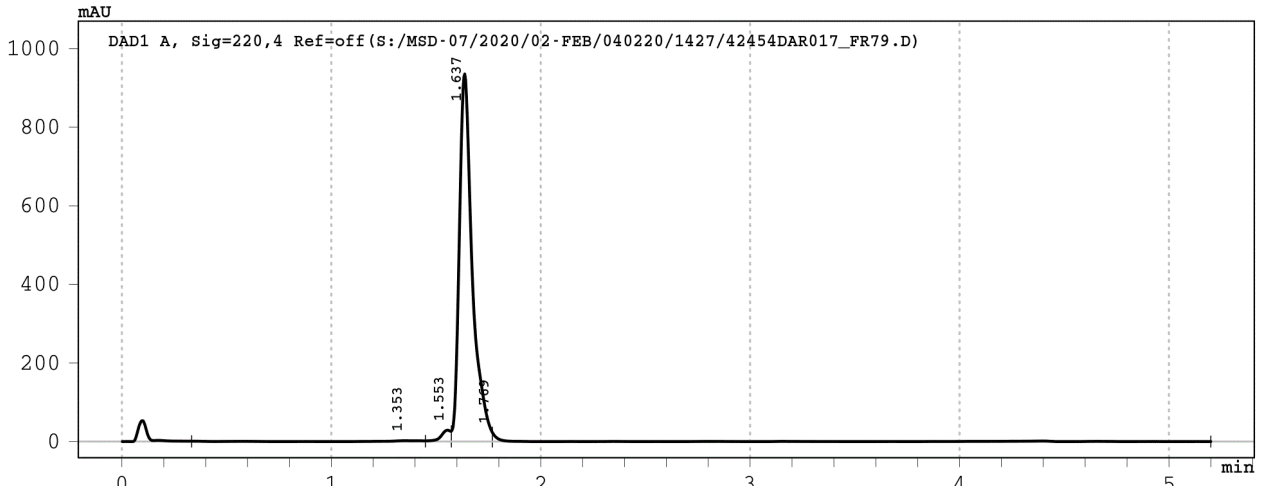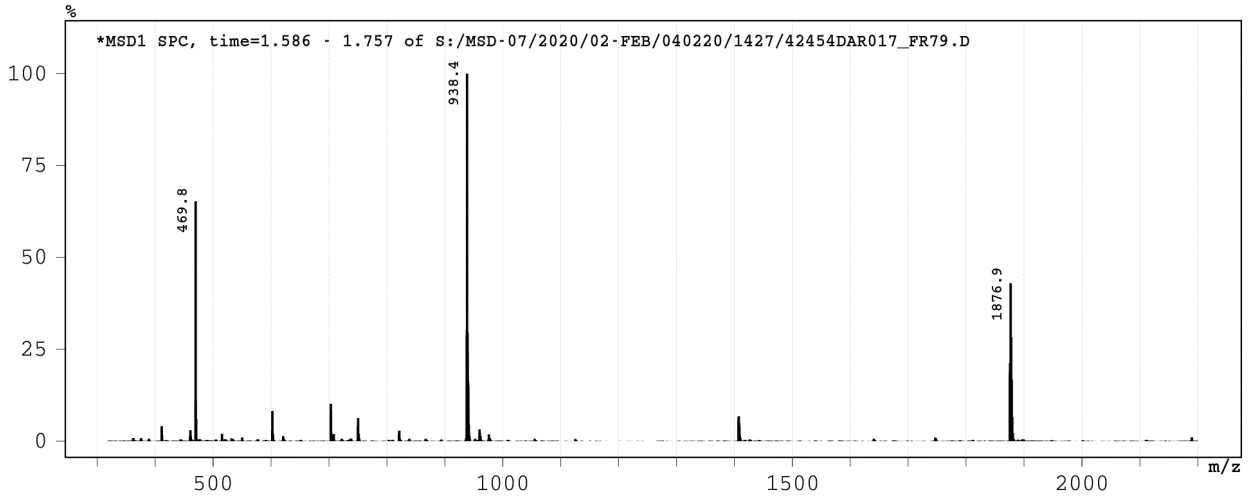

Signal 1: DAD1 A, Sig=220,4 Ref=off

| Peak # | RT [min] | Width [min] | Area   | Area % |
|--------|----------|-------------|--------|--------|
| 1      | 1.353    | 1.12        | 32.2   | 0.8    |
| 2      | 1.553    | 0.12        | 93.1   | 2.2    |
| 3      | 1.637    | 0.20        | 4035.9 | 95.4   |
| 4      | 1.769    | 3.43        | 68.8   | 1.6    |

Data File : S:/MSD-07/2020/02-FEB/040220/1427/42454DAR018\_FR8->  
 Injection Date : 04-Feb-20, 16:48:57  
 Sample Name : 42454DAR018\_FR8-9  
 Remarks : Baseline corrected  
 Acq. Method : D:/METHODS/5-95-6M.M  
 column used : Je\_559  
 Analysis Method : C:/CHEM32/1/METHODS/JPT-LCMS.M



Sample Info : 42454\_018-Dr. Martine Darwish H-SAIRSYQYV-OH

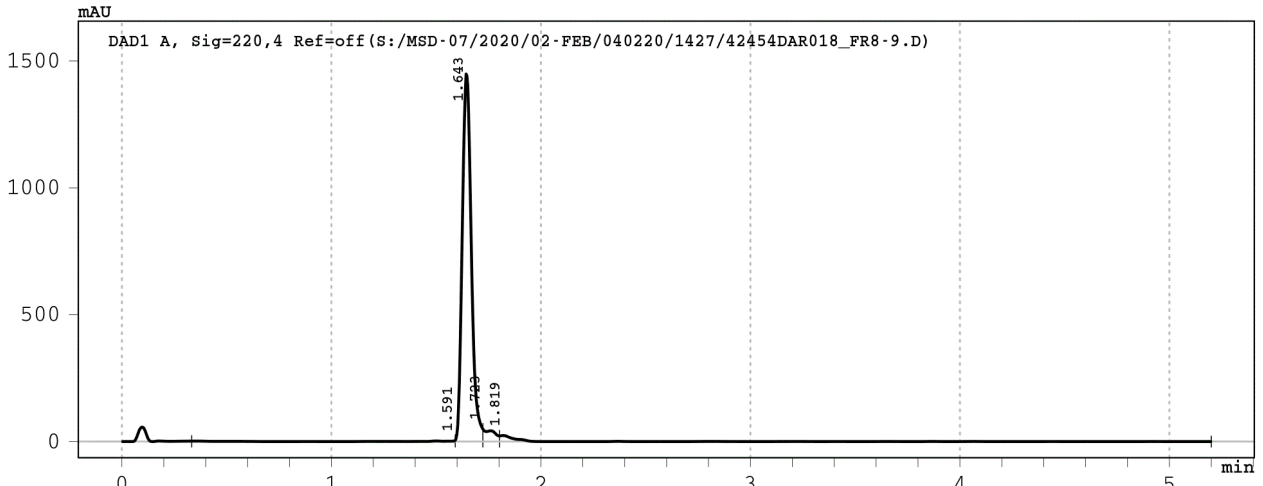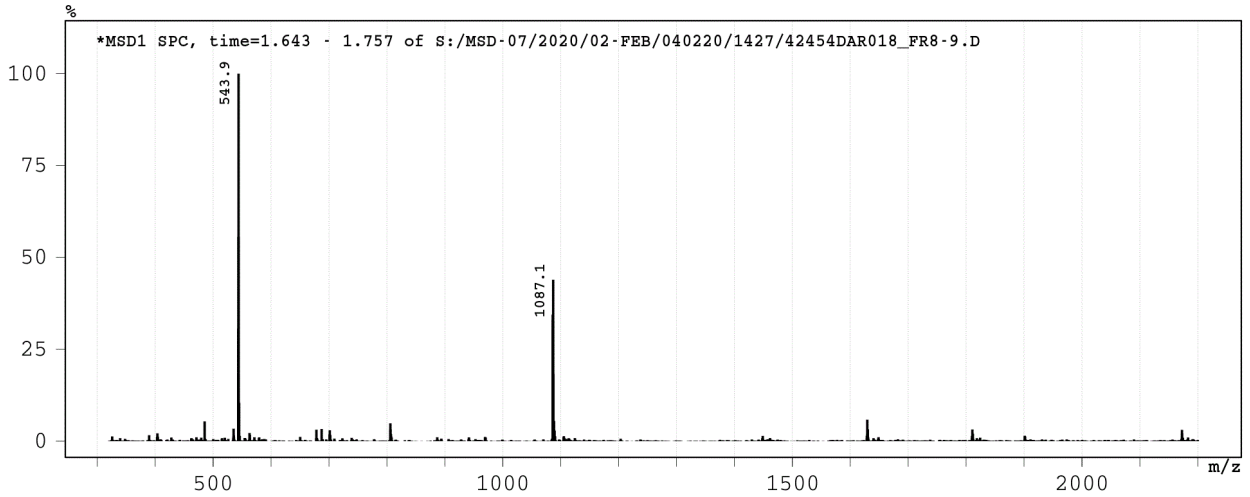

Signal 1: DAD1 A, Sig=220,4 Ref=off

| Peak # | RT [min] | Width [min] | Area   | Area % |
|--------|----------|-------------|--------|--------|
| 1      | 1.591    | 1.26        | 37.6   | 0.8    |
| 2      | 1.643    | 0.13        | 4371.4 | 92.8   |
| 3      | 1.723    | 0.08        | 176.1  | 3.7    |
| 4      | 1.819    | 3.40        | 125.1  | 2.7    |

Data File : S:/MSD-07/2020/02-FEB/040220/1427/42454DAR019\_FR1->

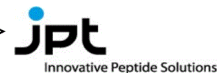

Injection Date : 04-Feb-20, 16:57:23  
Sample Name : 42454DAR019\_FR16-17  
Remarks : Baseline corrected  
Acq. Method : D:/METHODS/5-95-6M.M  
column used : Je\_559  
Analysis Method : C:/CHEM32/1/METHODS/JPT-LCMS.M

Sample Info : 42454\_019-Dr. Martine Darwish H-FALMNLKAL-OH

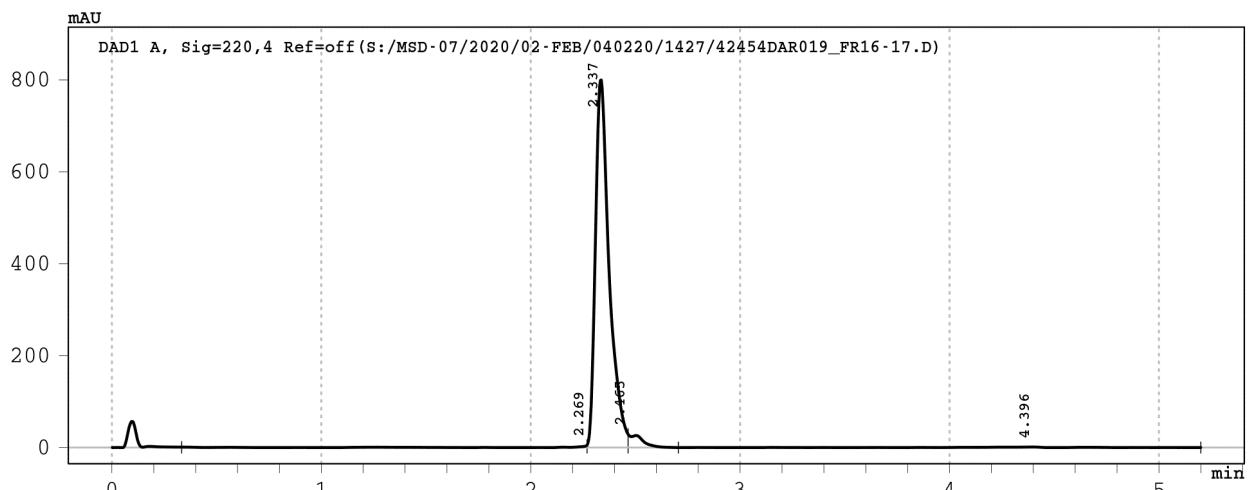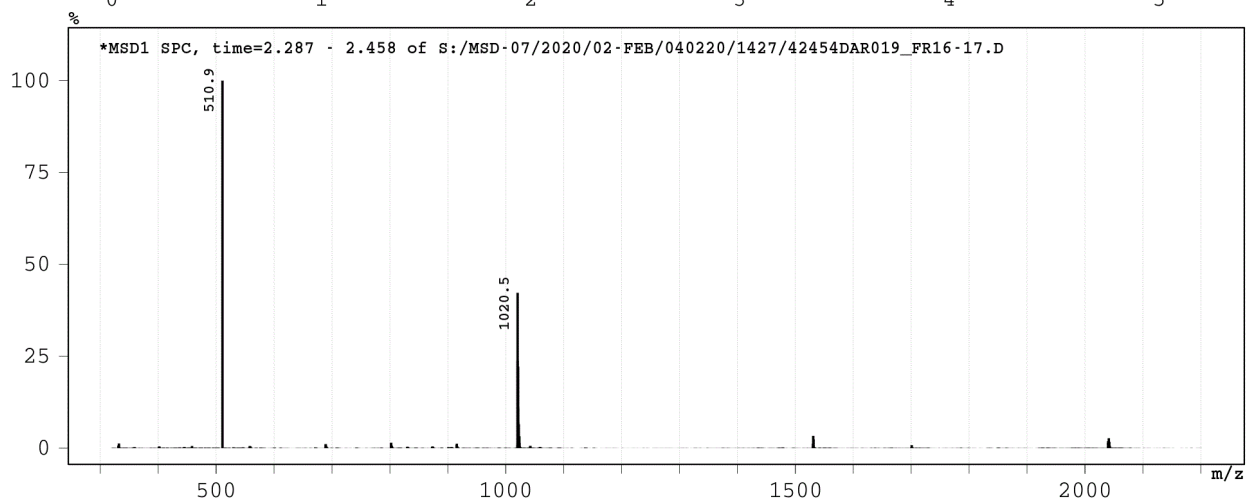

Signal 1: DAD1 A, Sig=220,4 Ref=off

| Peak # | RT [min] | Width [min] | Area   | Area % |
|--------|----------|-------------|--------|--------|
| 1      | 2.269    | 1.94        | 34.1   | 0.9    |
| 2      | 2.337    | 0.20        | 3663.3 | 95.0   |
| 3      | 2.465    | 0.24        | 131.1  | 3.4    |
| 4      | 4.396    | 2.50        | 29.2   | 0.8    |

Data File : S:/MSD-07/2020/02-FEB/040220/1427/42454DAR020\_FR2->  
 Injection Date : 04-Feb-20, 17:05:47  
 Sample Name : 42454DAR020\_FR26-27  
 Remarks : Baseline corrected  
 Acq. Method : D:/METHODS/5-95-6M.M  
 column used : Je\_559  
 Analysis Method : C:/CHEM32/1/METHODS/JPT-LCMS.M



Sample Info : 42454\_020-Dr. Martine Darwish H-SNFHFMAL-OH

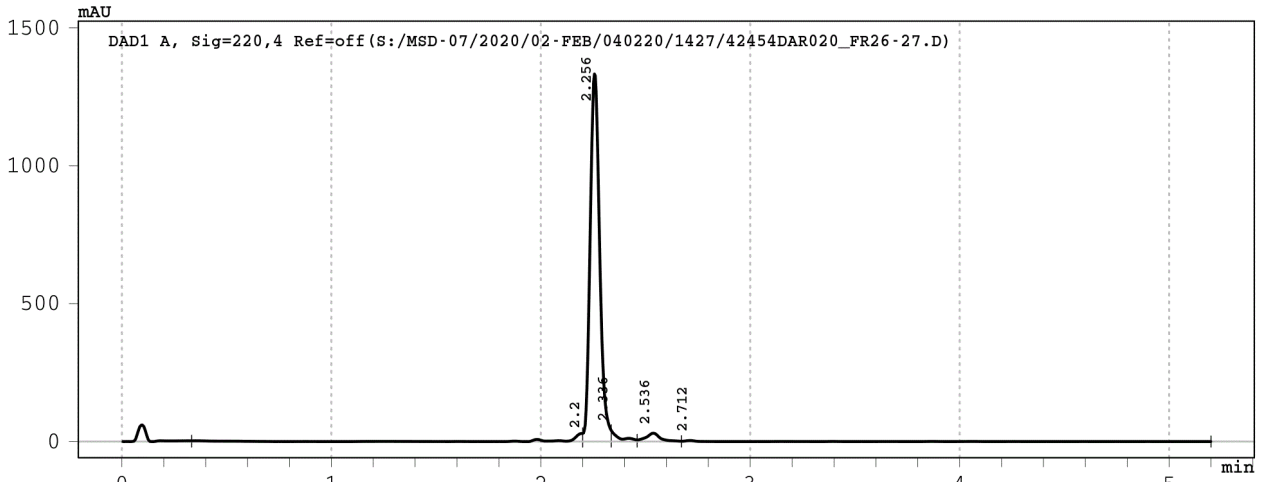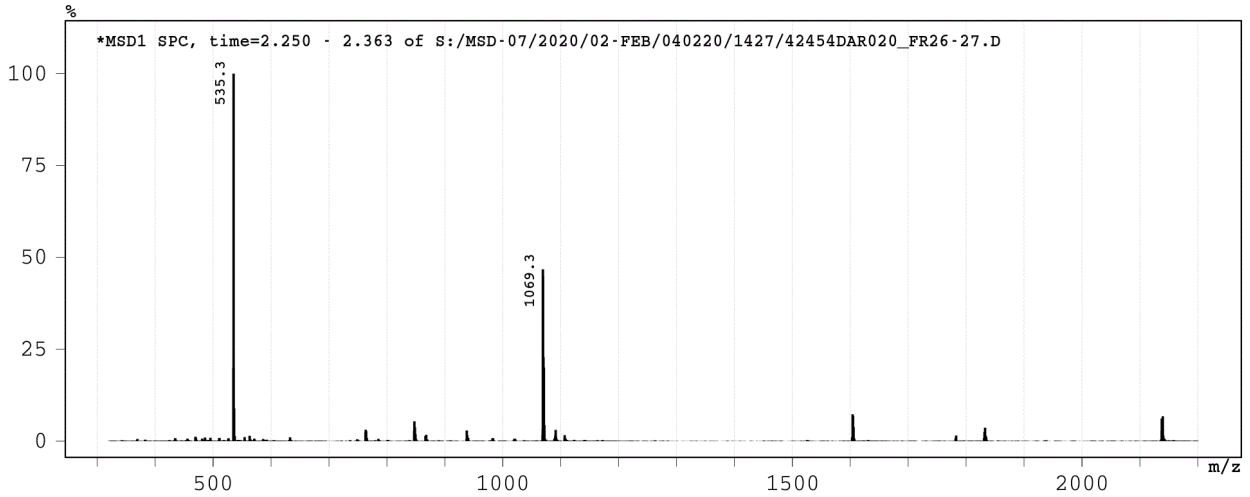

Signal 1: DAD1 A, Sig=220,4 Ref=off

| Peak # | RT [min] | Width [min] | Area   | Area % |
|--------|----------|-------------|--------|--------|
| 1      | 2.200    | 1.87        | 142.8  | 3.1    |
| 2      | 2.256    | 0.14        | 4209.8 | 91.1   |
| 3      | 2.336    | 0.12        | 104.4  | 2.3    |
| 4      | 2.536    | 0.21        | 145.2  | 3.1    |
| 5      | 2.712    | 2.53        | 20.2   | 0.4    |

Data File : S:/MSD-07/2020/02-FEB/040220/1427/42454DAR021\_FR3 ->



Injection Date : 04-Feb-20, 17:14:11  
Sample Name : 42454DAR021\_FR39  
Remarks : Baseline corrected  
Acq. Method : D:/METHODS/5-95-6M.M  
column used : Je\_559  
Analysis Method : C:/CHEM32/1/METHODS/JPT-LCMS.M

Sample Info : 42454\_021-Dr. Martine Darwish H-IGYSLPLIL-OH

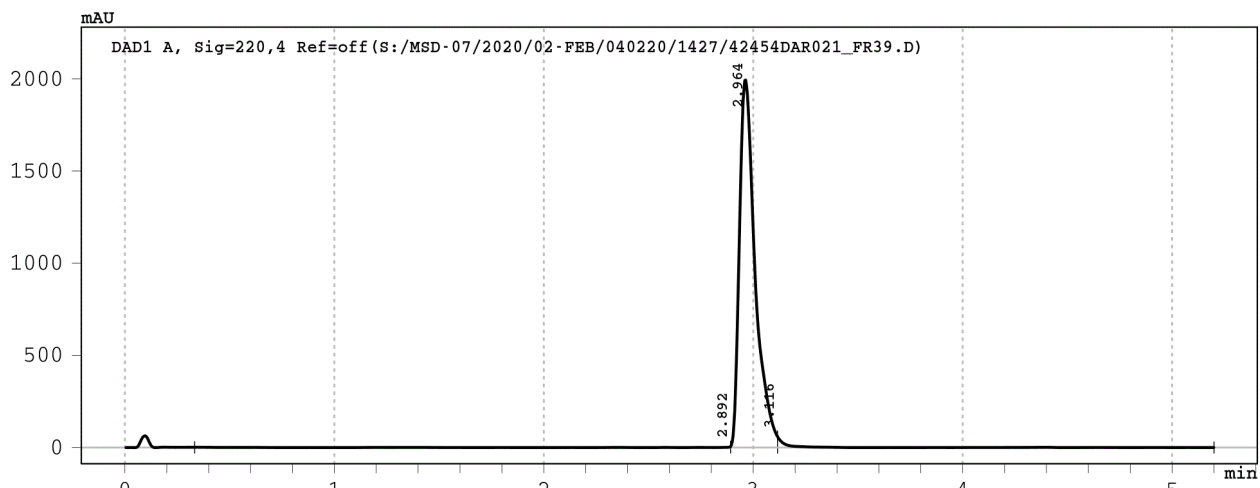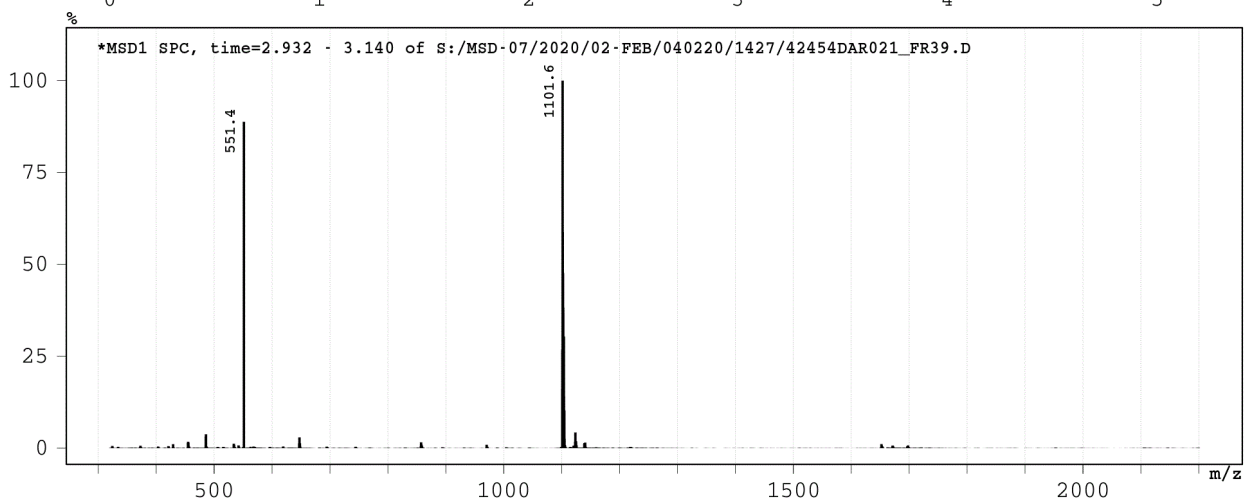

Signal 1: DAD1 A, Sig=220,4 Ref=off

| Peak # | RT [min] | Width [min] | Area    | Area % |
|--------|----------|-------------|---------|--------|
| 1      | 2.892    | 2.56        | 46.6    | 0.4    |
| 2      | 2.964    | 0.22        | 10399.1 | 98.0   |
| 3      | 3.116    | 2.08        | 166.0   | 1.6    |

Data File : S:/MSD-07/2020/02-FEB/040220/1427/42454DAR022\_FR5->  
 Injection Date : 04-Feb-20, 17:22:35  
 Sample Name : 42454DAR022\_FR52  
 Remarks : Baseline corrected  
 Acq. Method : D:/METHODS/5-95-6M.M  
 column used : Je\_559  
 Analysis Method : C:/CHEM32/1/METHODS/JPT-LCMS.M



Sample Info : 42454\_022-Dr. Martine Darwish H-KSFHFYCPL-OH

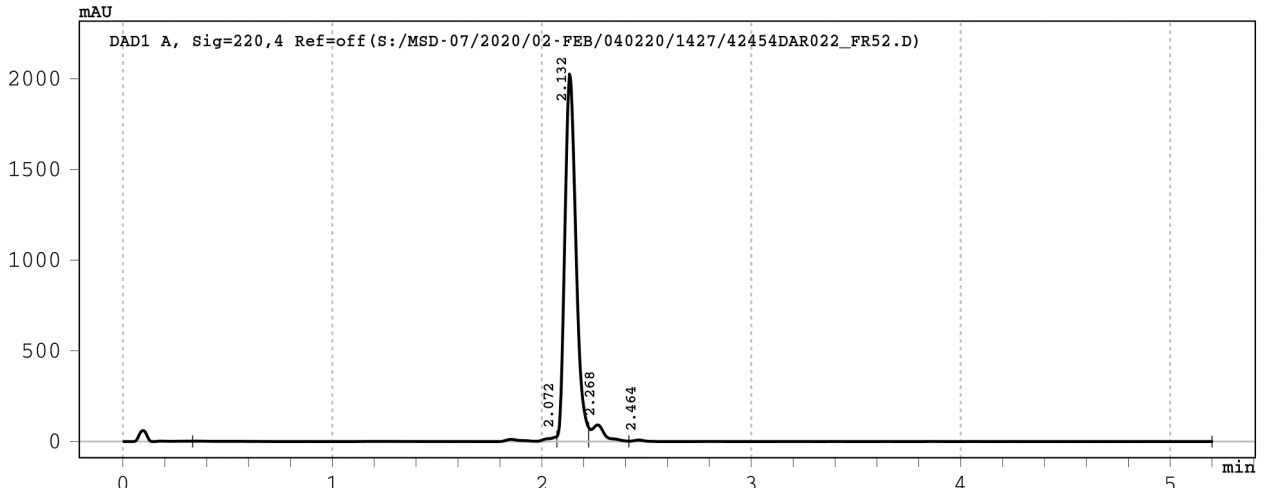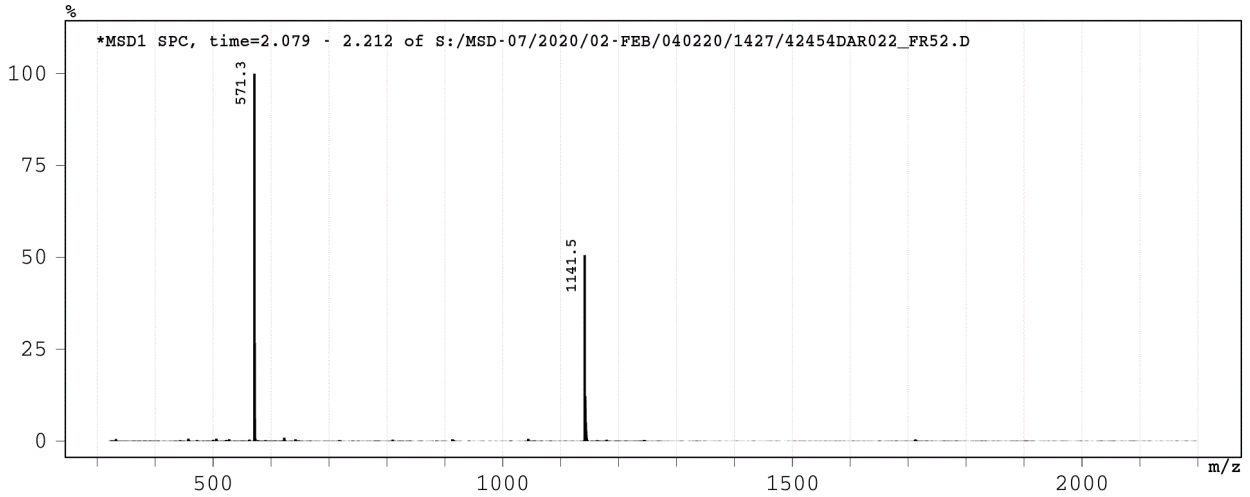

Signal 1: DAD1 A, Sig=220,4 Ref=off

| Peak # | RT [min] | Width [min] | Area   | Area % |
|--------|----------|-------------|--------|--------|
| 1      | 2.072    | 1.74        | 176.4  | 2.2    |
| 2      | 2.132    | 0.15        | 7476.5 | 92.1   |
| 3      | 2.268    | 0.19        | 426.4  | 5.3    |
| 4      | 2.464    | 2.78        | 39.4   | 0.5    |

Data File : S:/MSD-07/2020/02-FEB/040220/1427/42454DAR023\_FR1->  
 Injection Date : 04-Feb-20, 19:37:02  
 Sample Name : 42454DAR023\_FR18  
 Remarks : Baseline corrected  
 Acq. Method : D:/METHODS/5-95-6M.M  
 column used : Je\_559  
 Analysis Method : C:/CHEM32/1/METHODS/JPT-LCMS.M



Sample Info : 42454\_023-Dr. Martine Darwish H-MMKYYYESV-OH

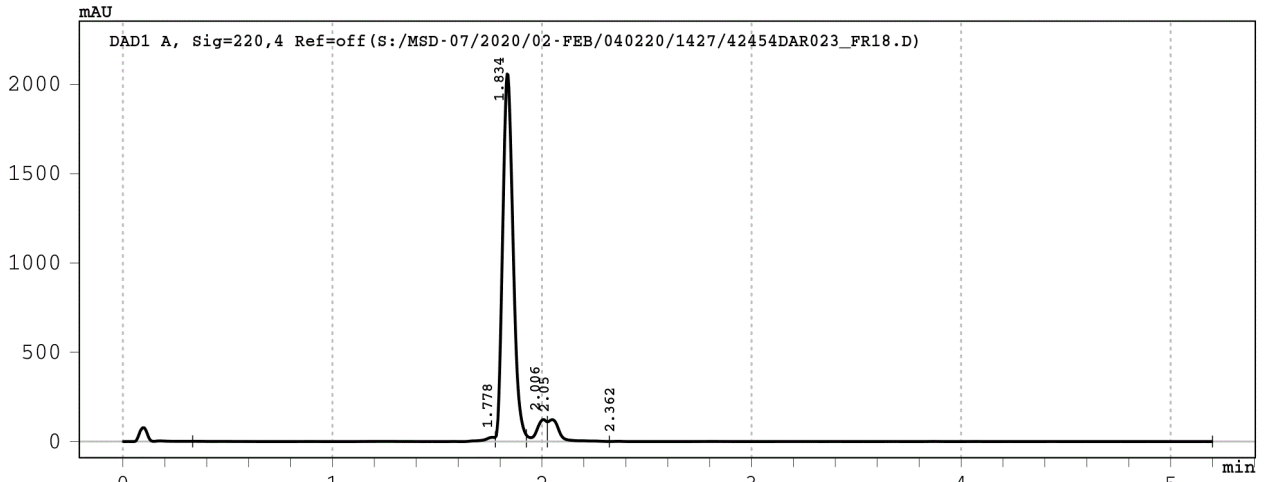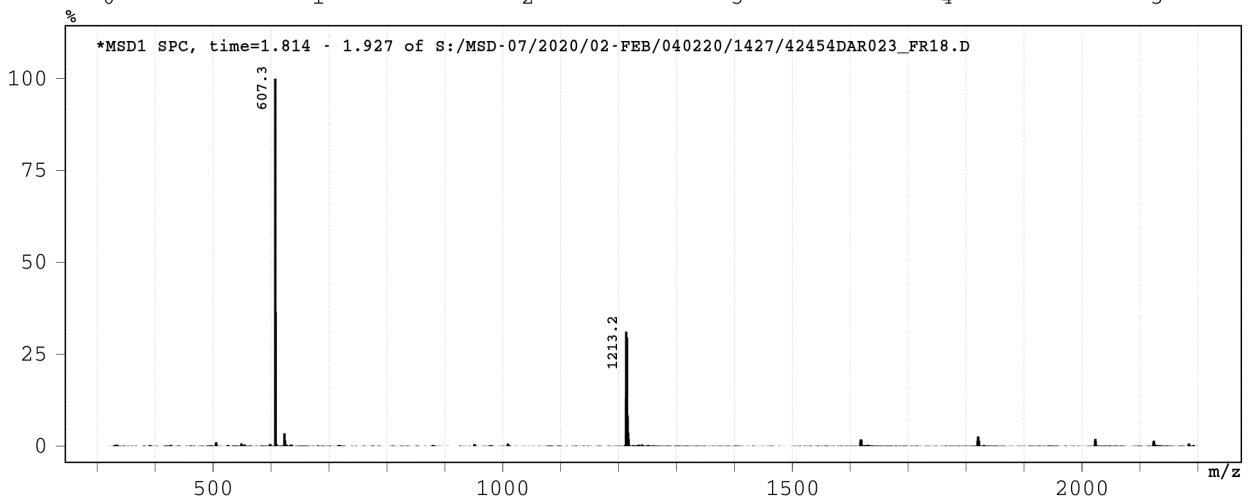

Signal 1: DAD1 A, Sig=220,4 Ref=off

| Peak # | RT [min] | Width [min] | Area   | Area % |
|--------|----------|-------------|--------|--------|
| 1      | 1.778    | 1.44        | 104.0  | 1.3    |
| 2      | 1.834    | 0.15        | 7119.1 | 87.7   |
| 3      | 2.006    | 0.10        | 417.4  | 5.1    |
| 4      | 2.050    | 0.30        | 465.1  | 5.7    |
| 5      | 2.362    | 2.88        | 15.2   | 0.2    |

Data File : S:/MSD-07/2020/02-FEB/180220/1438/42454DAR024\_FR6->  
 Injection Date : 18-Feb-20, 12:52:34  
 Sample Name : 42454DAR024\_FR65-68  
 Remarks : Baseline corrected  
 Acq. Method : D:/METHODS/5-95-6M.M  
 column used : Je\_559  
 Analysis Method : C:/CHEM32/1/METHODS/JPT-LCMS.M

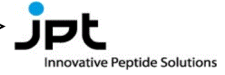

Sample Info : 42454\_024-Dr. Martine Darwish H-QILVFLILL-OH

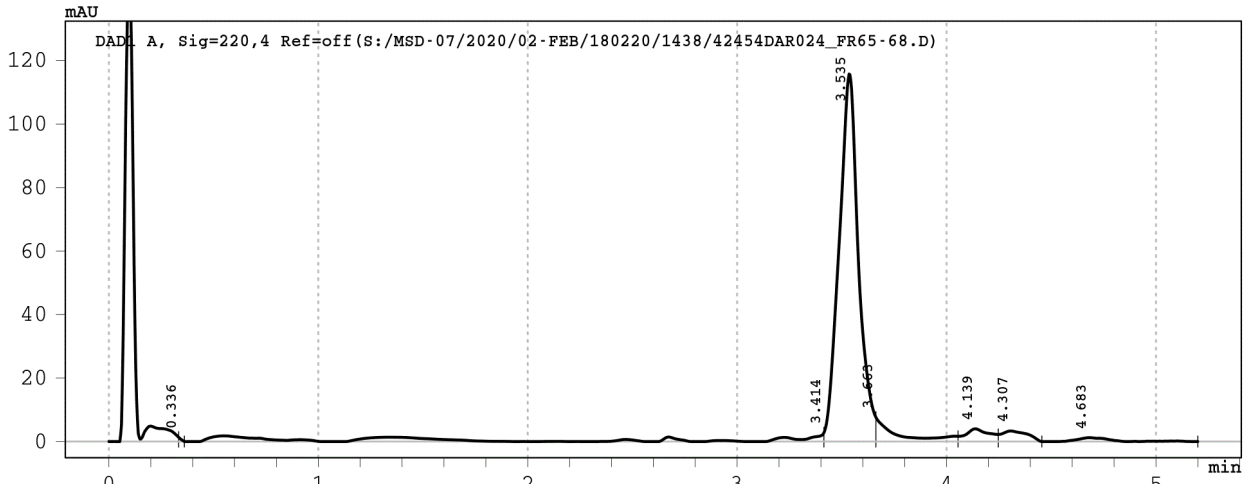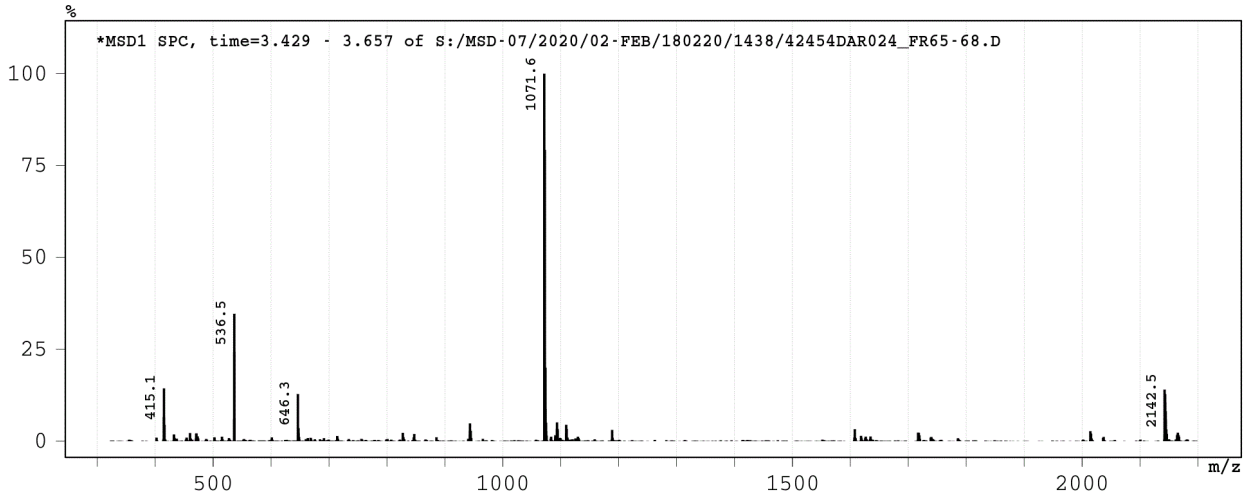

Signal 1: DAD1 A, Sig=220,4 Ref=off

| Peak # | RT [min] | Width [min] | Area  | Area % |
|--------|----------|-------------|-------|--------|
| 1      | 0.336    | 0.03        | 0.8   | 0.1    |
| 2      | 3.414    | 3.05        | 92.9  | 9.7    |
| 3      | 3.535    | 0.25        | 742.6 | 77.5   |
| 4      | 3.663    | 0.39        | 48.8  | 5.1    |
| 5      | 4.139    | 0.19        | 31.8  | 3.3    |
| 6      | 4.307    | 0.21        | 28.5  | 3.0    |
| 7      | 4.683    | 0.74        | 13.1  | 1.4    |



Data File : S:/MSD-07/2020/02-FEB/040220/1427/42454DAR025\_FR4->

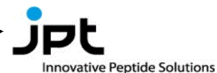

Injection Date : 04-Feb-20, 19:53:52  
Sample Name : 42454DAR025\_FR44-45  
Remarks : Baseline corrected  
Acq. Method : D:/METHODS/5-95-6M.M  
column used : Je\_559  
Analysis Method : C:/CHEM32/1/METHODS/JPT-LCMS.M

Sample Info : 42454\_025-Dr. Martine Darwish H-TATRNDFTL-OH

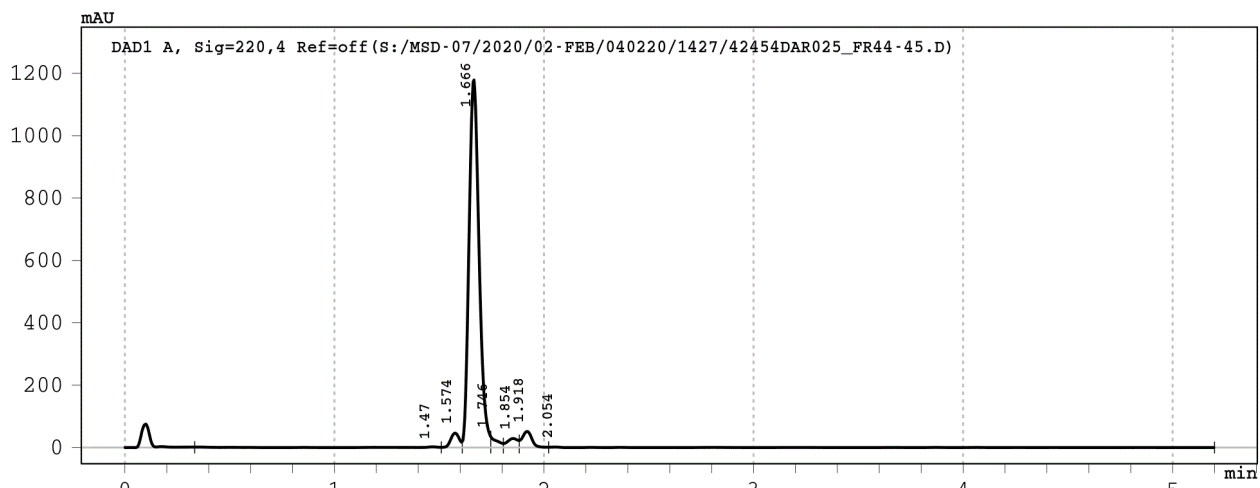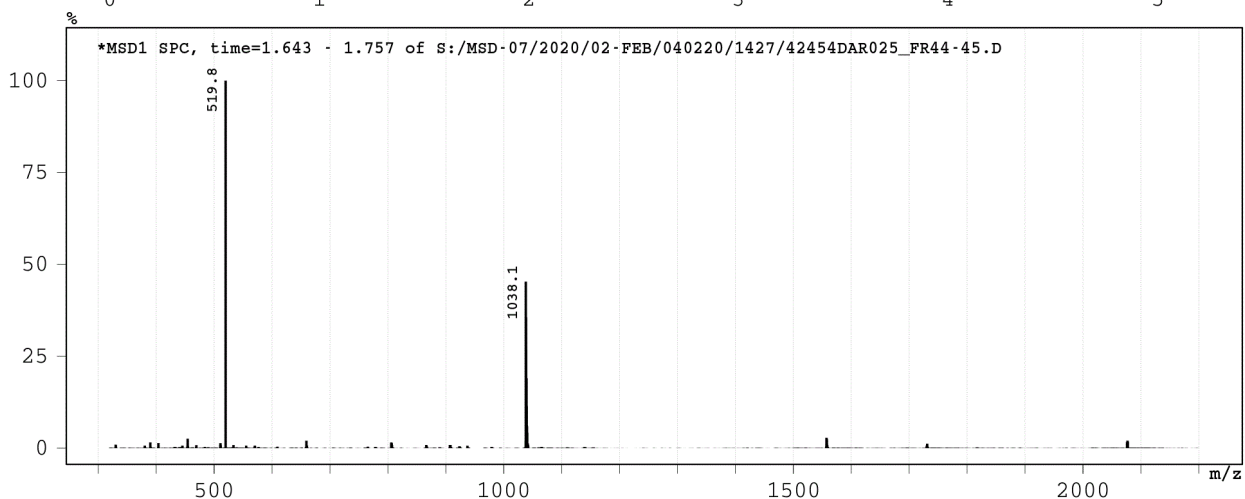

Signal 1: DAD1 A, Sig=220,4 Ref=off

| Peak # | RT [min] | Width [min] | Area   | Area % |
|--------|----------|-------------|--------|--------|
| 1      | 1.470    | 1.18        | 28.6   | 0.6    |
| 2      | 1.574    | 0.10        | 132.0  | 3.0    |
| 3      | 1.666    | 0.14        | 3937.2 | 88.2   |
| 4      | 1.746    | 0.06        | 75.8   | 1.7    |
| 5      | 1.854    | 0.08        | 104.0  | 2.3    |
| 6      | 1.918    | 0.14        | 168.4  | 3.8    |
| 7      | 2.054    | 3.18        | 19.5   | 0.4    |

Data File : S:/MSD-07/2020/02-FEB/040220/1427/42454DAR026\_FR5->  
 Injection Date : 04-Feb-20, 20:02:18  
 Sample Name : 42454DAR026\_FR58-59  
 Remarks : Baseline corrected  
 Acq. Method : D:/METHODS/5-95-6M.M  
 column used : Je\_559  
 Analysis Method : C:/CHEM32/1/METHODS/JPT-LCMS.M



Sample Info : 42454\_026-Dr. Martine Darwish H-MAPIDHTM-OH

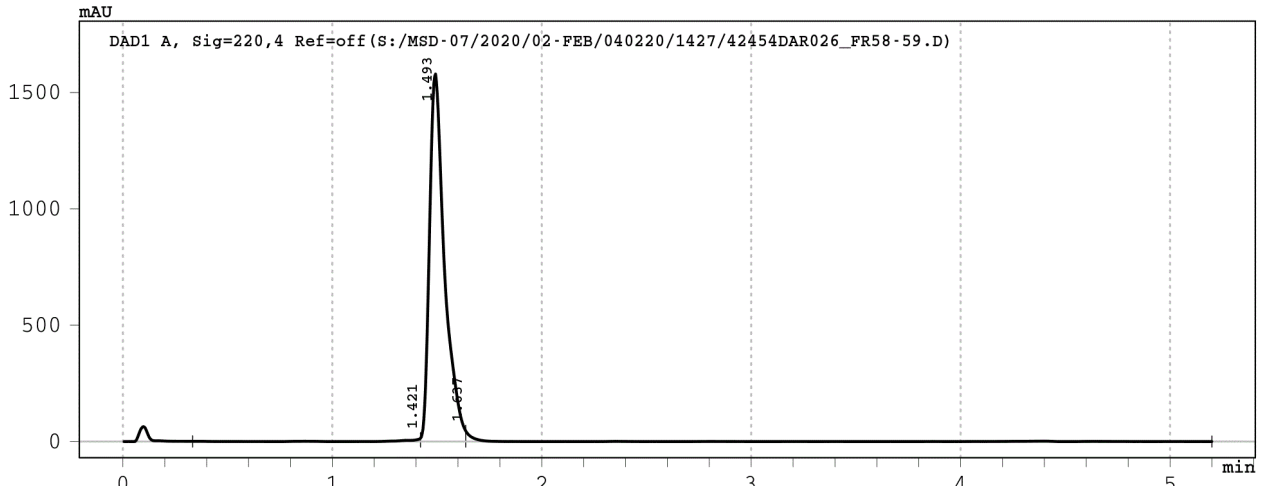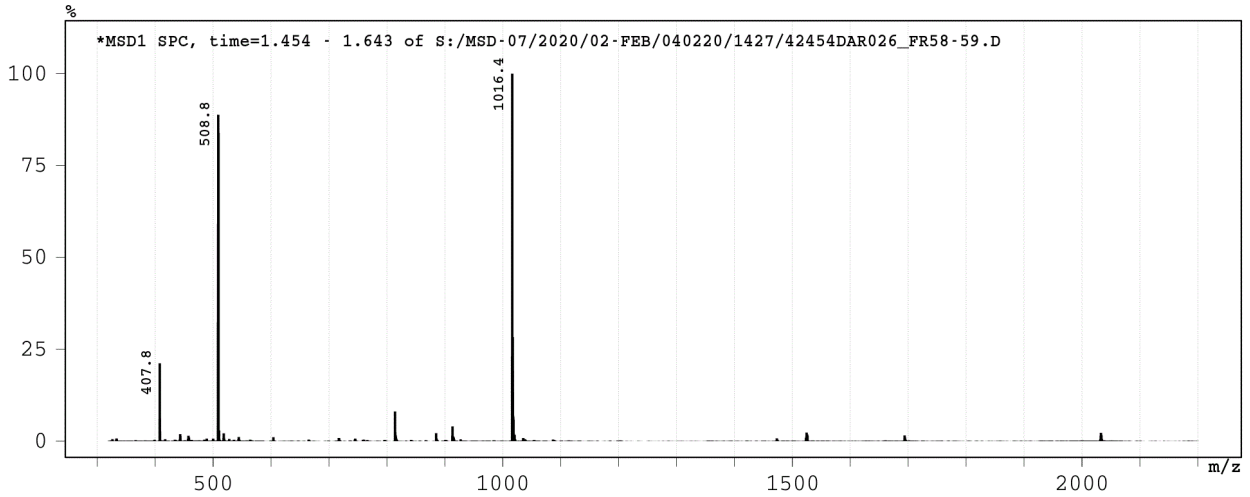

Signal 1: DAD1 A, Sig=220,4 Ref=off

| Peak # | RT [min] | Width [min] | Area   | Area % |
|--------|----------|-------------|--------|--------|
| 1      | 1.421    | 1.09        | 62.8   | 0.8    |
| 2      | 1.493    | 0.22        | 7887.2 | 97.6   |
| 3      | 1.637    | 3.56        | 129.3  | 1.6    |

Data File : S:/MSD-07/2020/02-FEB/140220/1435/42454DAR028\_FR1->  
 Injection Date : 14-Feb-20, 23:36:26  
 Sample Name : 42454DAR028\_FR12-14  
 Remarks : Baseline corrected  
 Acq. Method : D:/METHODS/5-95-6M.M  
 column used : Je\_559  
 Analysis Method : C:/CHEM32/1/METHODS/JPT-LCMS.M



Sample Info : 42454\_028-Dr. Martine Darwish H-IVYKRSV-OH

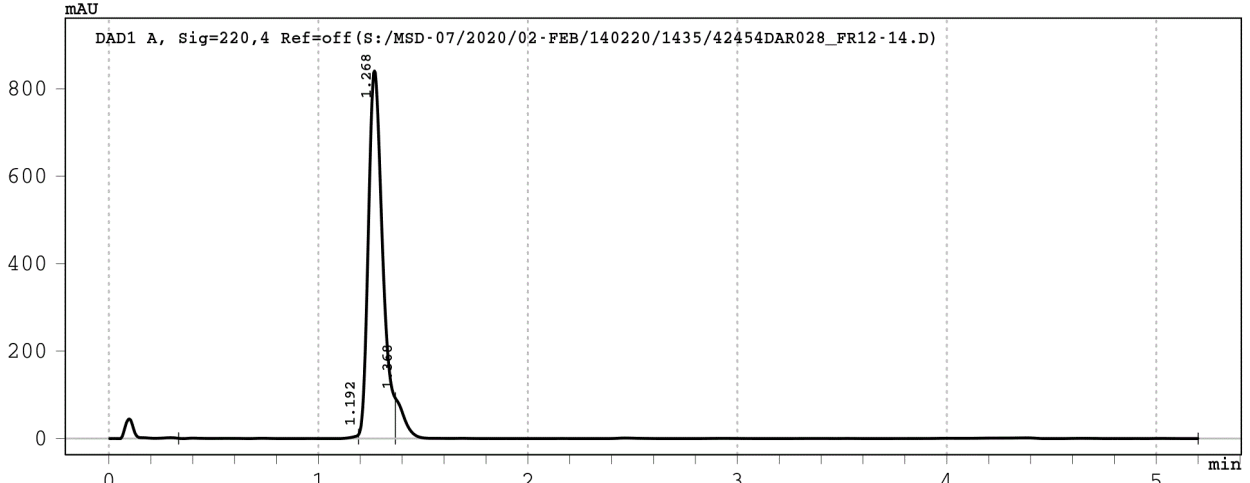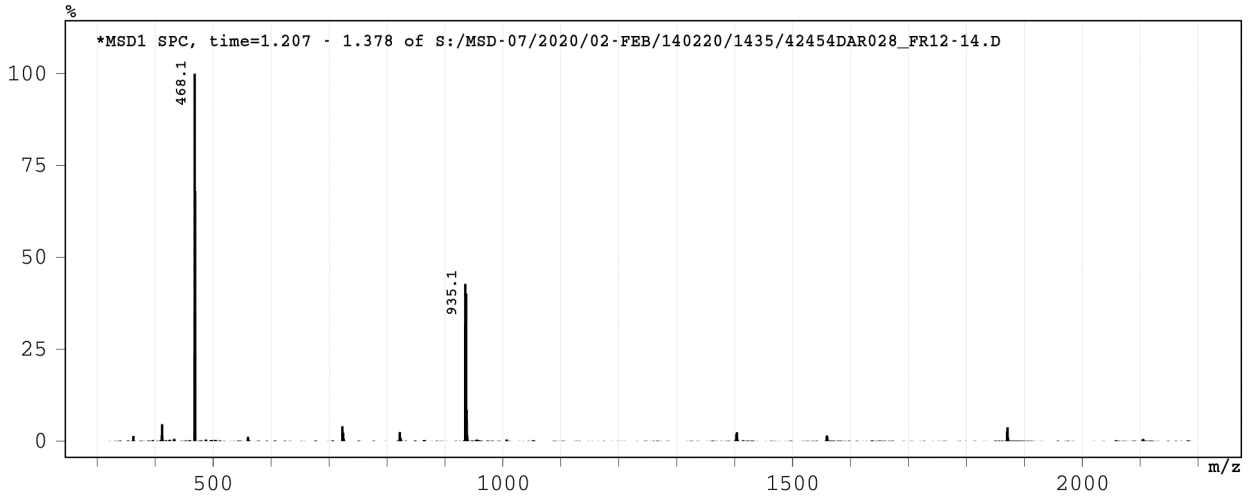

Signal 1: DAD1 A, Sig=220,4 Ref=off

| Peak # | RT [min] | Width [min] | Area   | Area % |
|--------|----------|-------------|--------|--------|
| 1      | 1.192    | 0.86        | 22.2   | 0.5    |
| 2      | 1.268    | 0.18        | 3959.6 | 92.1   |
| 3      | 1.368    | 3.83        | 318.6  | 7.4    |

Data File : S:/MSD-07/2020/02-FEB/040220/1427/42454DAR029\_FR7->  
 Injection Date : 04-Feb-20, 20:10:43  
 Sample Name : 42454DAR029\_FR79  
 Remarks : Baseline corrected  
 Acq. Method : D:/METHODS/5-95-6M.M  
 column used : Je\_559  
 Analysis Method : C:/CHEM32/1/METHODS/JPT-LCMS.M



Sample Info : 42454\_029-Dr. Martine Darwish H-YQPLYSSSL-OH

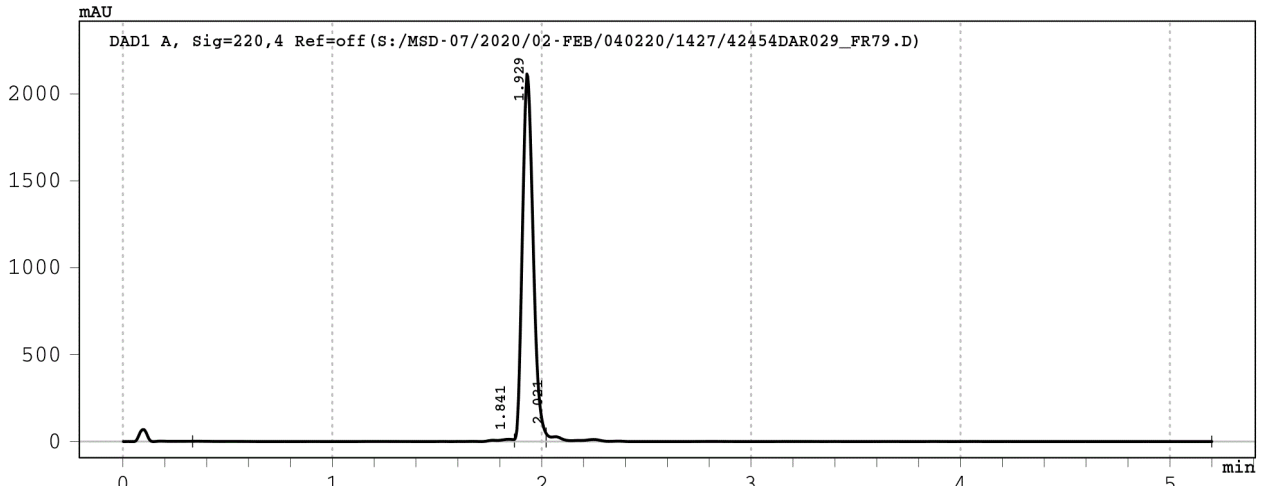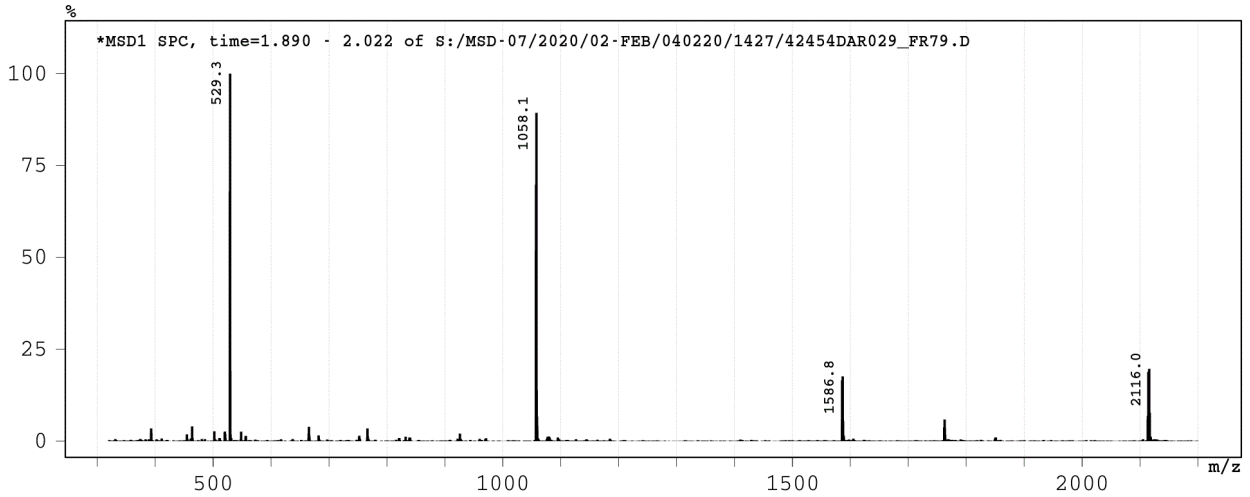

Signal 1: DAD1 A, Sig=220,4 Ref=off

| Peak # | RT [min] | Width [min] | Area   | Area % |
|--------|----------|-------------|--------|--------|
| 1      | 1.841    | 1.54        | 94.9   | 1.2    |
| 2      | 1.929    | 0.15        | 7548.7 | 95.8   |
| 3      | 2.021    | 3.18        | 238.6  | 3.0    |

Data File : S:/MSD-07/2020/02-FEB/040220/1427/42454DAR030\_FR9->  
 Injection Date : 04-Feb-20, 20:19:07  
 Sample Name : 42454DAR030\_FR99-100  
 Remarks : Baseline corrected  
 Acq. Method : D:/METHODS/5-95-6M.M  
 column used : Je\_559  
 Analysis Method : C:/CHEM32/1/METHODS/JPT-LCMS.M



Sample Info : 42454\_030-Dr. Martine Darwish H-KIPKFSMPGF-OH

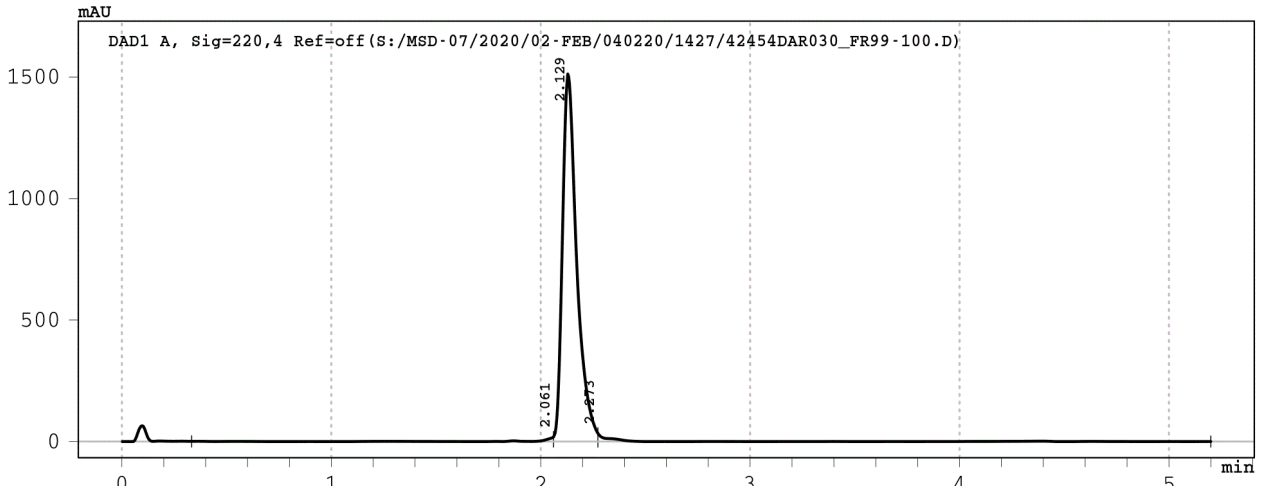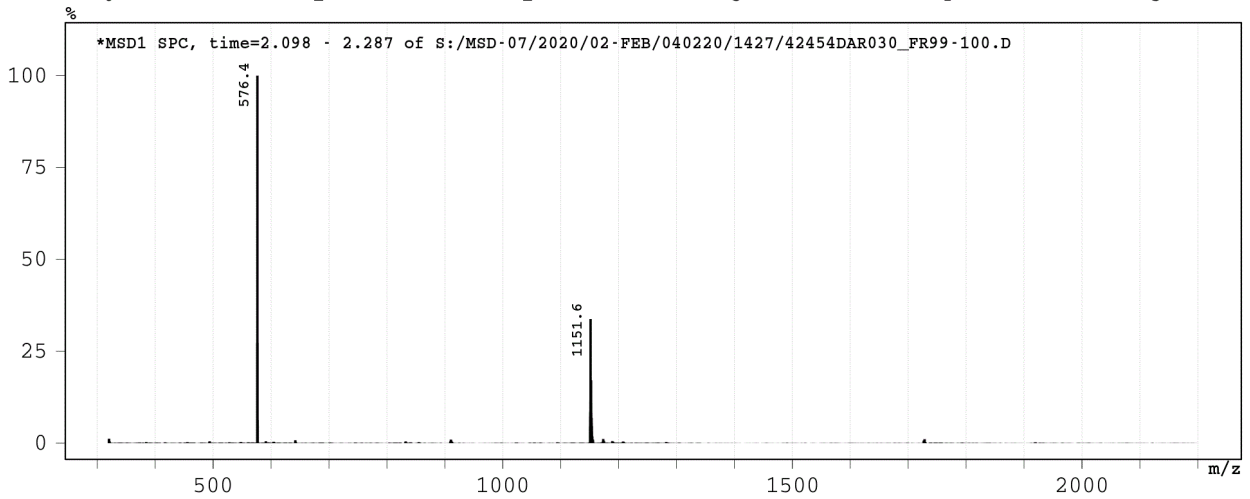

Signal 1: DAD1 A, Sig=220,4 Ref=off

| Peak # | RT [min] | Width [min] | Area   | Area % |
|--------|----------|-------------|--------|--------|
| 1      | 2.061    | 1.73        | 75.6   | 1.0    |
| 2      | 2.129    | 0.21        | 7191.2 | 97.0   |
| 3      | 2.273    | 2.93        | 144.8  | 2.0    |

Data File : S:/MSD-07/2020/02-FEB/040220/1427/42454DAR031\_FR4->



Injection Date : 04-Feb-20, 20:27:31  
Sample Name : 42454DAR031\_FR4-5  
Remarks : Baseline corrected  
Acq. Method : D:/METHODS/5-95-6M.M  
column used : Je\_559  
Analysis Method : C:/CHEM32/1/METHODS/JPT-LCMS.M

Sample Info : 42454\_031-Dr. Martine Darwish H-SAIQDNIPL-OH

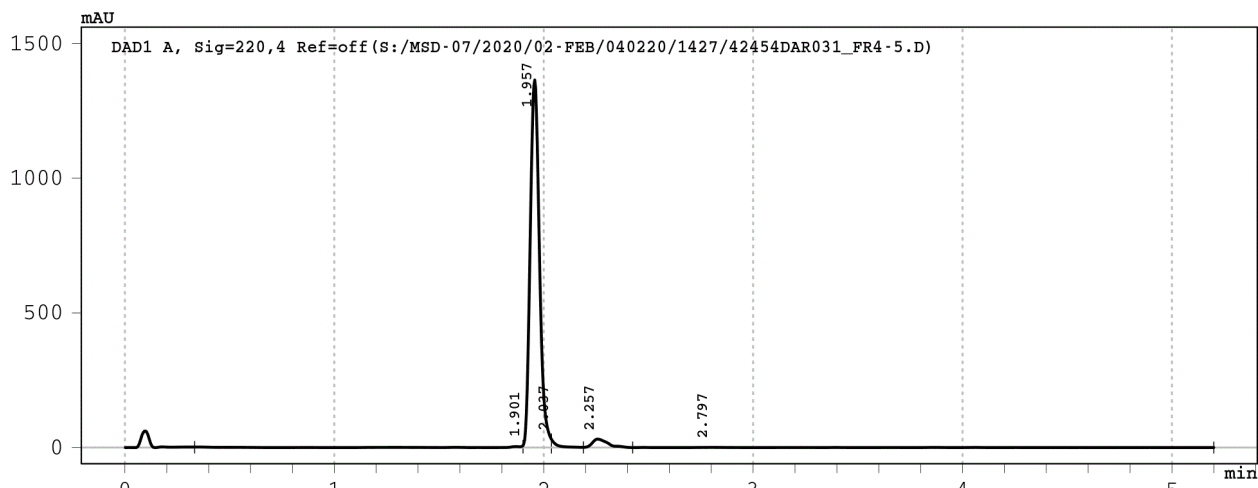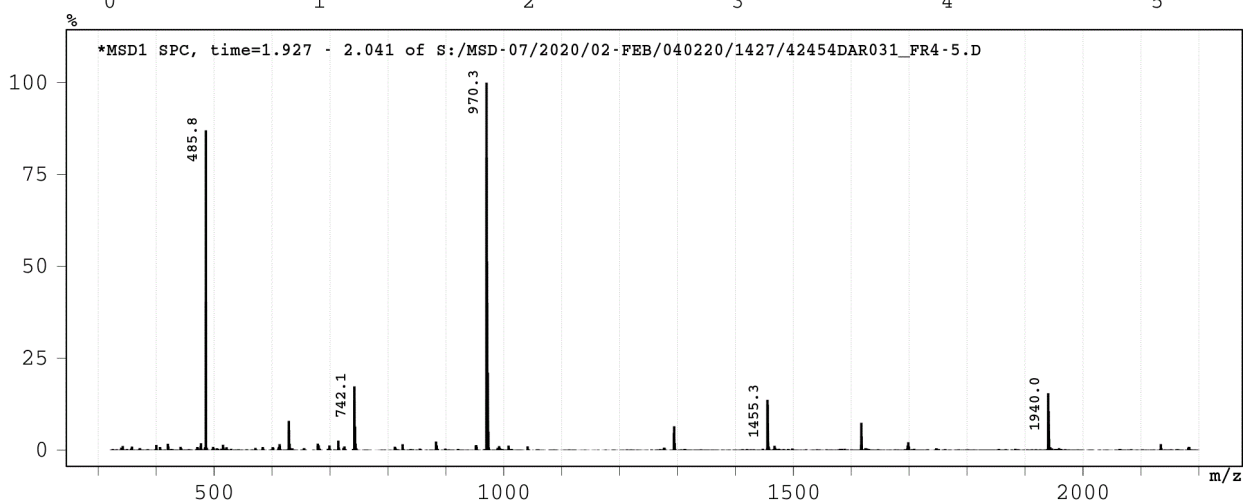

Signal 1: DAD1 A, Sig=220,4 Ref=off

| Peak # | RT [min] | Width [min] | Area   | Area % |
|--------|----------|-------------|--------|--------|
| 1      | 1.901    | 1.57        | 45.8   | 1.0    |
| 2      | 1.957    | 0.14        | 4190.9 | 94.0   |
| 3      | 2.037    | 0.15        | 47.8   | 1.1    |
| 4      | 2.257    | 0.24        | 159.2  | 3.6    |
| 5      | 2.797    | 2.77        | 12.8   | 0.3    |

Data File : S:/MSD-07/2020/02-FEB/040220/1427/42454DAR032\_FR1->



Injection Date : 04-Feb-20, 20:35:57  
Sample Name : 42454DAR032\_FR12-13  
Remarks : Baseline corrected  
Acq. Method : D:/METHODS/5-95-6M.M  
column used : Je\_559  
Analysis Method : C:/CHEM32/1/METHODS/JPT-LCMS.M

Sample Info : 42454\_032-Dr. Martine Darwish H-CVVPFTDLL-OH

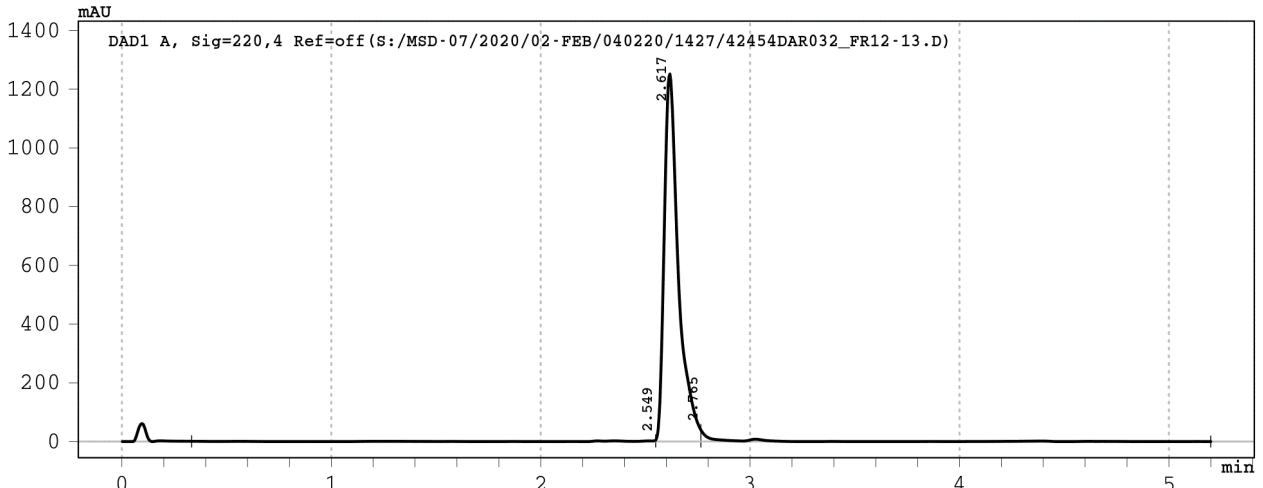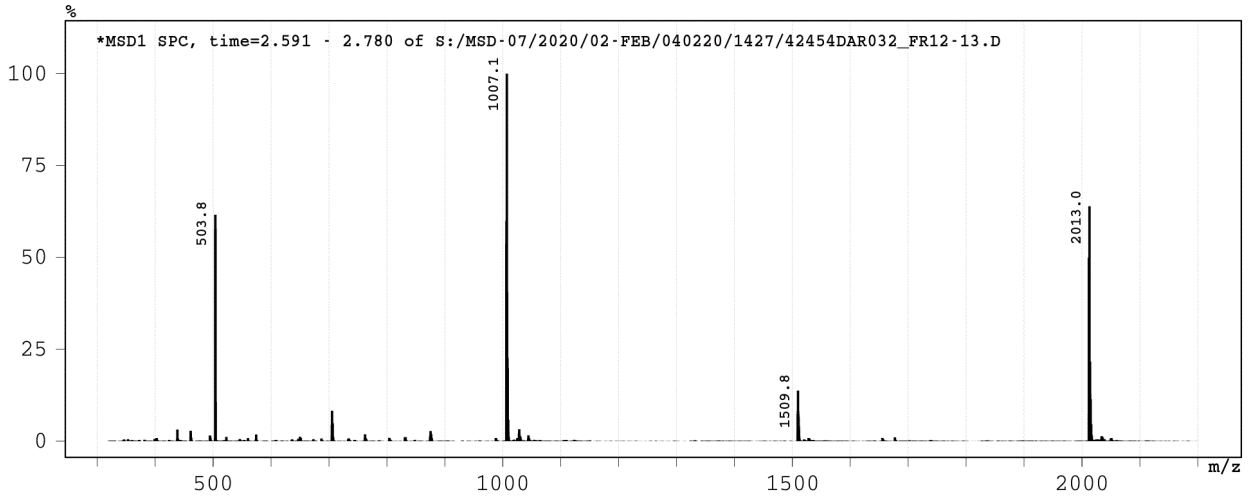

Signal 1: DAD1 A, Sig=220,4 Ref=off

| Peak # | RT [min] | Width [min] | Area   | Area % |
|--------|----------|-------------|--------|--------|
| 1      | 2.549    | 2.22        | 55.7   | 0.9    |
| 2      | 2.617    | 0.22        | 5904.9 | 96.3   |
| 3      | 2.765    | 2.43        | 174.0  | 2.8    |

Data File : S:/MSD-07/2020/02-FEB/040220/1427/42454DAR033\_FR2->



Injection Date : 04-Feb-20, 20:44:23  
Sample Name : 42454DAR033\_FR26-28  
Remarks : Baseline corrected  
Acq. Method : D:/METHODS/5-95-6M.M  
column used : Je\_559  
Analysis Method : C:/CHEM32/1/METHODS/JPT-LCMS.M

Sample Info : 42454\_033-Dr. Martine Darwish H-SAHTMLPGM-OH

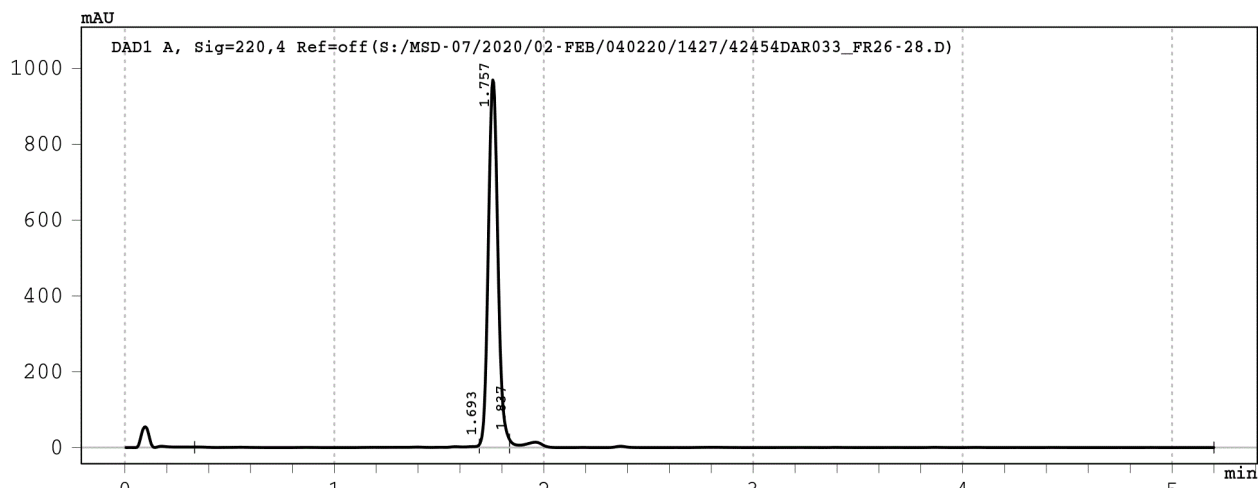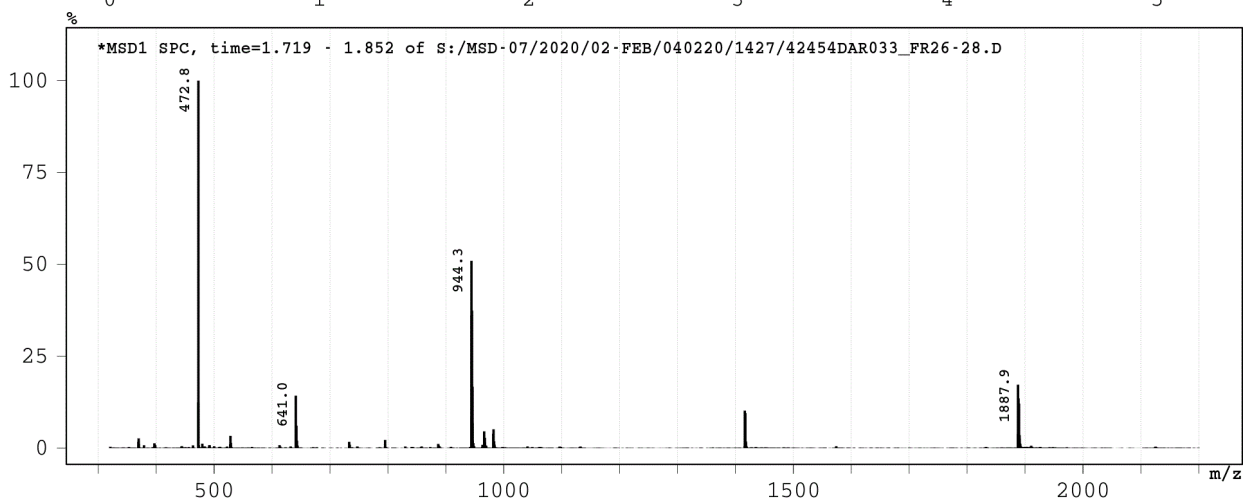

Signal 1: DAD1 A, Sig=220,4 Ref=off

| Peak # | RT [min] | Width [min] | Area   | Area % |
|--------|----------|-------------|--------|--------|
| 1      | 1.693    | 1.36        | 47.0   | 1.4    |
| 2      | 1.757    | 0.14        | 3094.6 | 94.6   |
| 3      | 1.837    | 3.36        | 129.7  | 4.0    |



Data File : S:/MSD-07/2020/02-FEB/040220/1427/42454DAR034\_FR3->



Injection Date : 04-Feb-20, 20:52:47  
Sample Name : 42454DAR034\_FR38-40  
Remarks : Baseline corrected  
Acq. Method : D:/METHODS/5-95-6M.M  
column used : Je\_559  
Analysis Method : C:/CHEM32/1/METHODS/JPT-LCMS.M

Sample Info : 42454\_034-Dr. Martine Darwish H-SSSTAAAL-OH

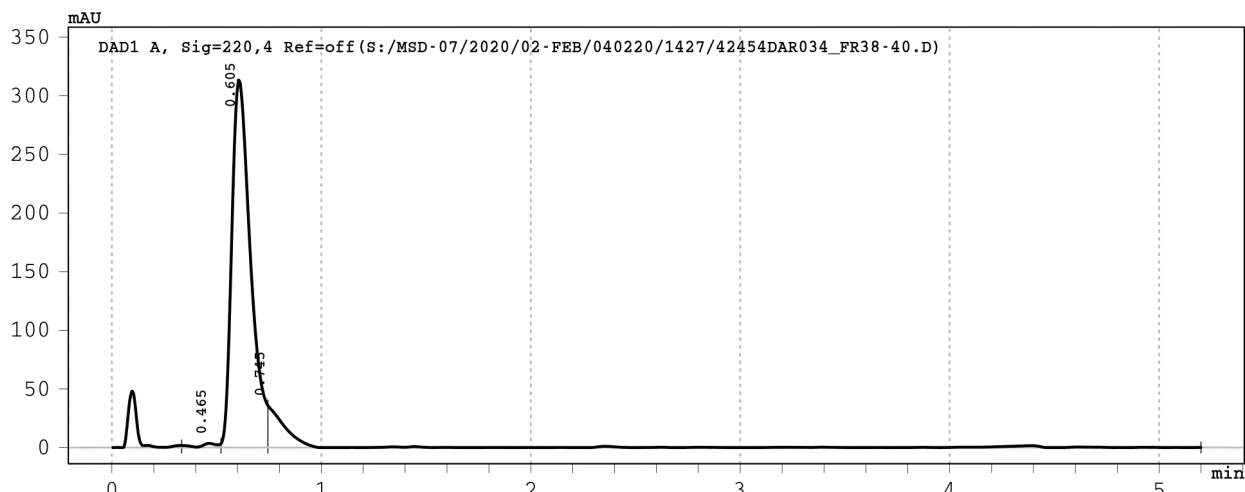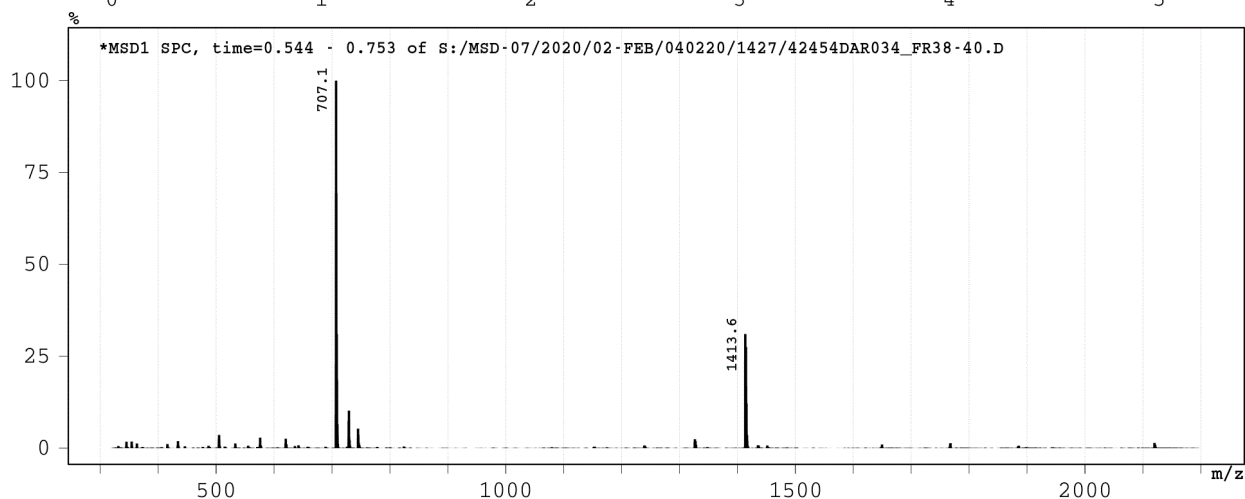

Signal 1: DAD1 A, Sig=220,4 Ref=off

| Peak # | RT [min] | Width [min] | Area   | Area % |
|--------|----------|-------------|--------|--------|
| 1      | 0.465    | 0.19        | 20.9   | 0.9    |
| 2      | 0.605    | 0.22        | 1946.2 | 88.3   |
| 3      | 0.745    | 4.46        | 237.1  | 10.8   |

Data File : S:/MSD-07/2020/02-FEB/040220/1427/42454DAR035\_FR5->



Injection Date : 04-Feb-20, 21:01:12  
Sample Name : 42454DAR035\_FR58-59  
Remarks : Baseline corrected  
Acq. Method : D:/METHODS/5-95-6M.M  
column used : Je\_559  
Analysis Method : C:/CHEM32/1/METHODS/JPT-LCMS.M

Sample Info : 42454\_035-Dr. Martine Darwish H-IVGHFYGGL-OH

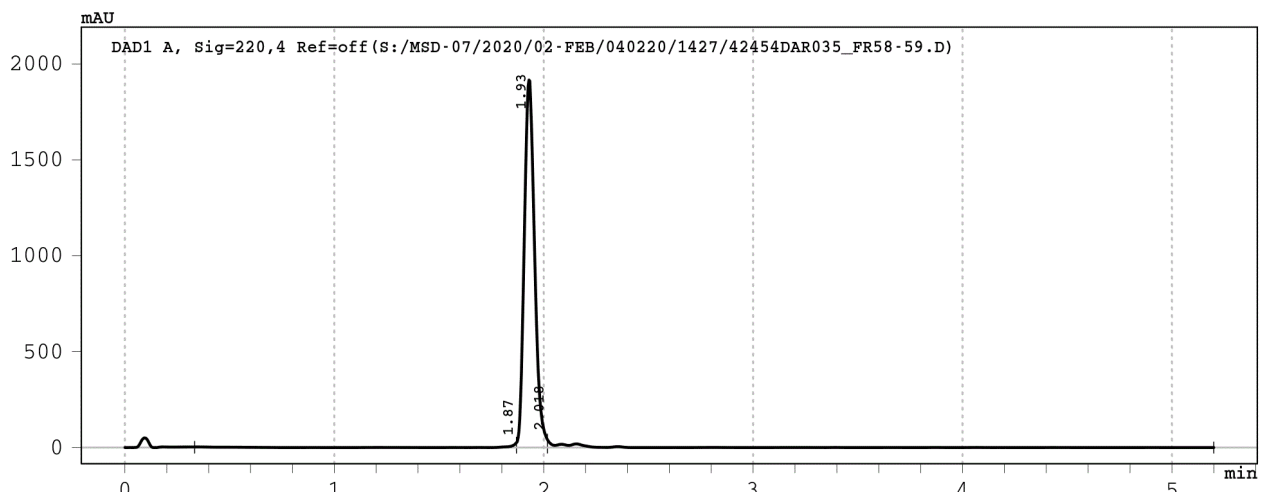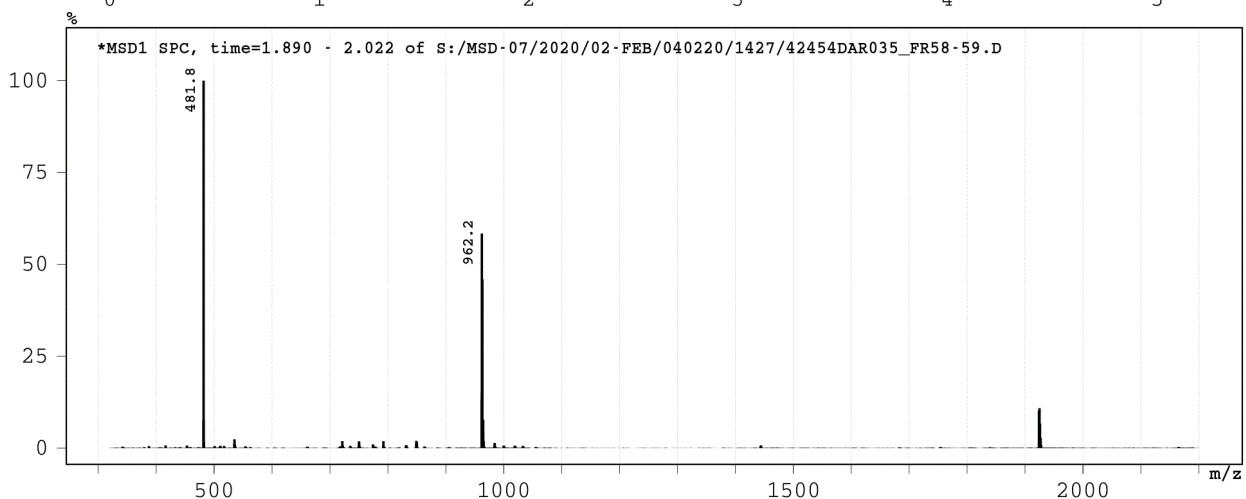

Signal 1: DAD1 A, Sig=220,4 Ref=off

| Peak # | RT [min] | Width [min] | Area   | Area % |
|--------|----------|-------------|--------|--------|
| 1      | 1.870    | 1.54        | 79.6   | 1.2    |
| 2      | 1.930    | 0.15        | 6575.5 | 95.7   |
| 3      | 2.018    | 3.18        | 215.7  | 3.1    |

Data File : S:/MSD-07/2020/02-FEB/040220/1427/42454DAR036\_FR7->



Injection Date : 04-Feb-20, 21:09:35  
Sample Name : 42454DAR036\_FR72-73  
Remarks : Baseline corrected  
Acq. Method : D:/METHODS/5-95-6M.M  
column used : Je\_559  
Analysis Method : C:/CHEM32/1/METHODS/JPT-LCMS.M

Sample Info : 42454\_036-Dr. Martine Darwish H-VVFDVQRI-OH

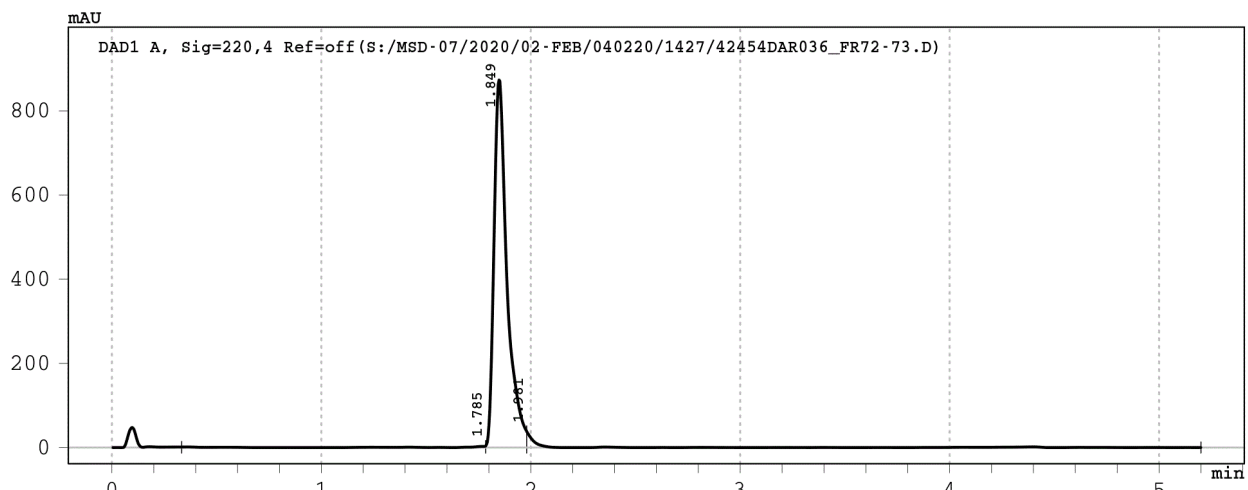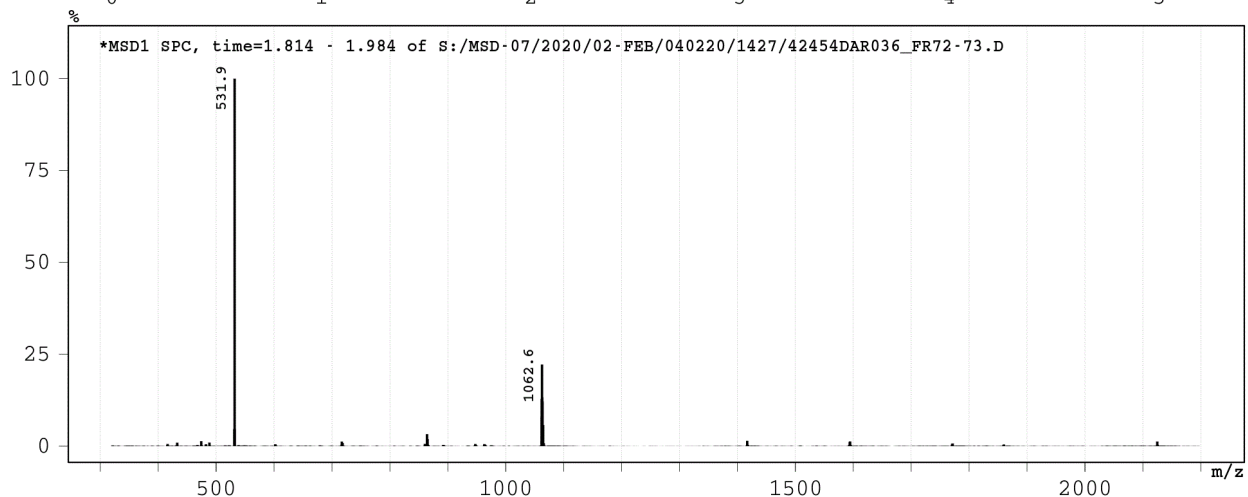

Signal 1: DAD1 A, Sig=220,4 Ref=off

| Peak # | RT [min] | Width [min] | Area   | Area % |
|--------|----------|-------------|--------|--------|
| 1      | 1.785    | 1.45        | 38.4   | 1.0    |
| 2      | 1.849    | 0.20        | 3779.4 | 96.0   |
| 3      | 1.981    | 3.22        | 120.7  | 3.1    |

Data File : S:/MSD-07/2020/02-FEB/040220/1427/42454DAR037\_FR7->



Injection Date : 04-Feb-20, 21:18:01  
Sample Name : 42454DAR037\_FR76-77  
Remarks : Baseline corrected  
Acq. Method : D:/METHODS/5-95-6M.M  
column used : Je\_559  
Analysis Method : C:/CHEM32/1/METHODS/JPT-LCMS.M

Sample Info : 42454\_037-Dr. Martine Darwish H-LSLVRTMAV-OH

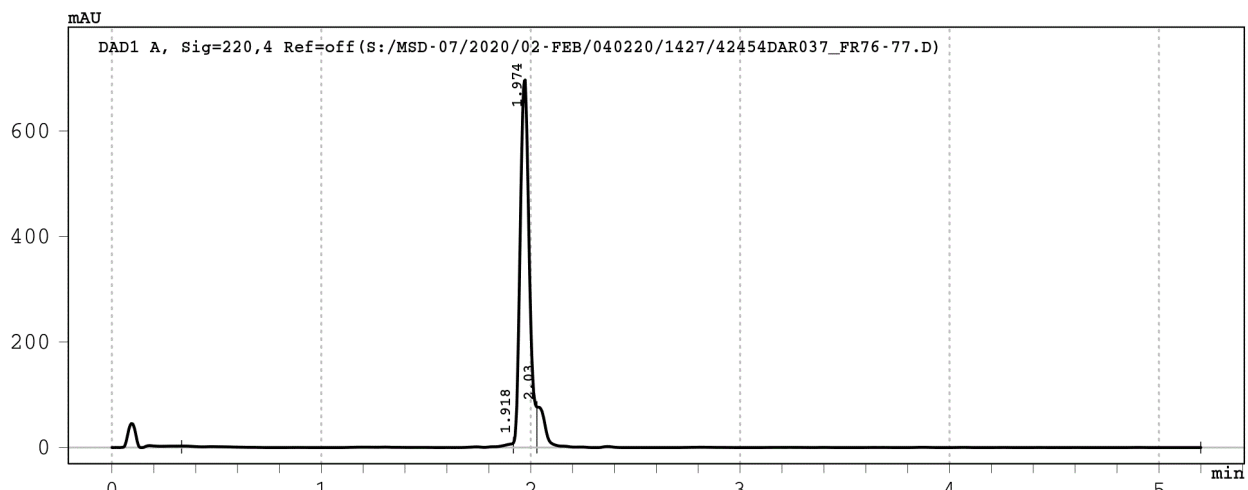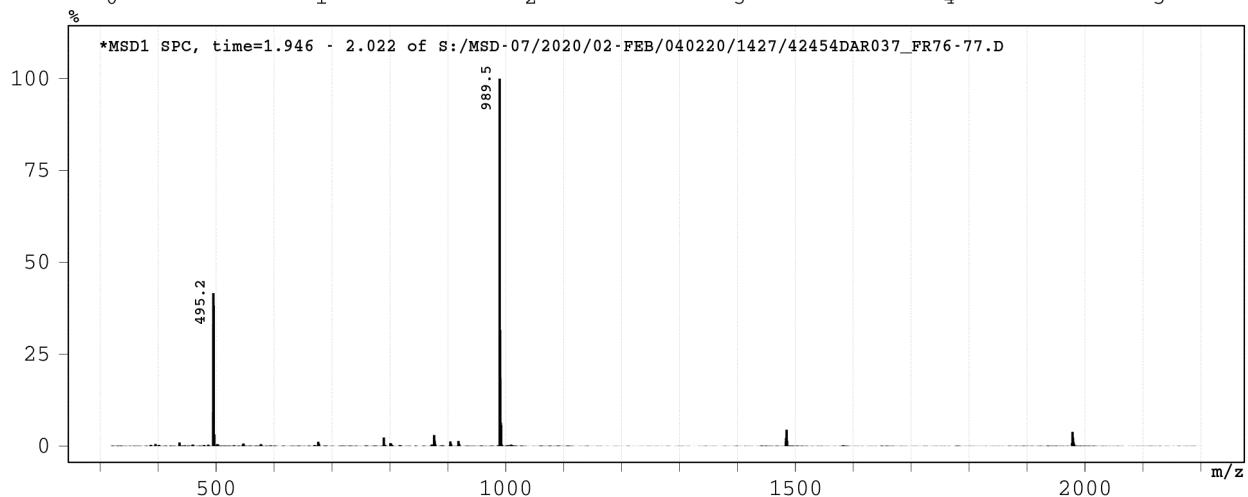

Signal 1: DAD1 A, Sig=220,4 Ref=off

| Peak # | RT [min] | Width [min] | Area   | Area % |
|--------|----------|-------------|--------|--------|
| 1      | 1.918    | 1.58        | 70.4   | 2.9    |
| 2      | 1.974    | 0.11        | 2102.8 | 87.2   |
| 3      | 2.030    | 3.17        | 237.3  | 9.8    |

Data File : S:/MSD-07/2020/02-FEB/040220/1427/42454DAR038\_FR9 ->  
 Injection Date : 04-Feb-20, 21:26:25  
 Sample Name : 42454DAR038\_FR90  
 Remarks : Baseline corrected  
 Acq. Method : D:/METHODS/5-95-6M.M  
 column used : Je\_559  
 Analysis Method : C:/CHEM32/1/METHODS/JPT-LCMS.M



Sample Info : 42454\_038-Dr. Martine Darwish H-MSTQNLATV-OH

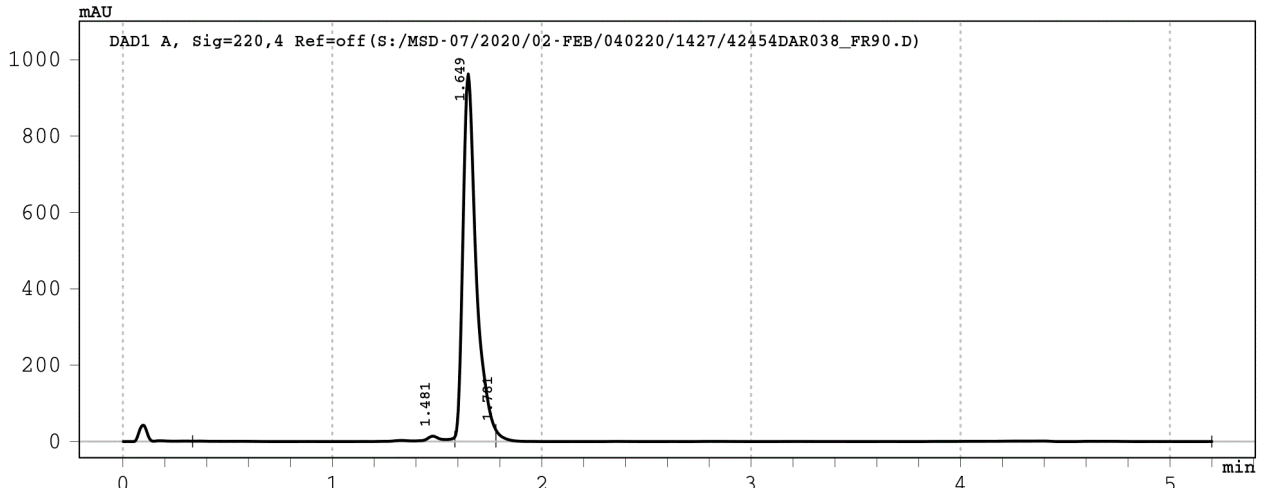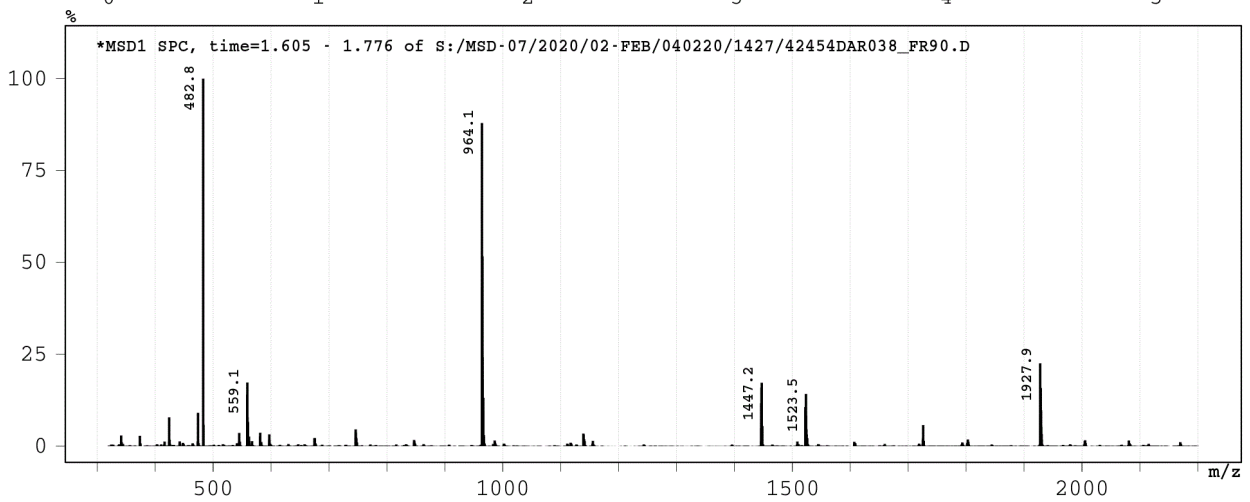

Signal 1: DAD1 A, Sig=220,4 Ref=off

| Peak # | RT [min] | Width [min] | Area   | Area % |
|--------|----------|-------------|--------|--------|
| 1      | 1.481    | 1.25        | 108.7  | 2.4    |
| 2      | 1.649    | 0.20        | 4244.5 | 95.3   |
| 3      | 1.781    | 3.42        | 101.7  | 2.3    |

Data File : S:/MSD-07/2020/02-FEB/050220/1428/42454DAR039\_FR8->

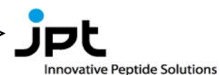

Injection Date : 06-Feb-20, 01:00:47  
Sample Name : 42454DAR039\_FR8  
Remarks : Baseline corrected  
Acq. Method : D:/METHODS/5-95-6M.M  
column used : Je\_559  
Analysis Method : C:/CHEM32/1/METHODS/JPT-LCMS.M

Sample Info : 42454\_039-Dr. Martine Darwish H-VIYSECLRV-OH

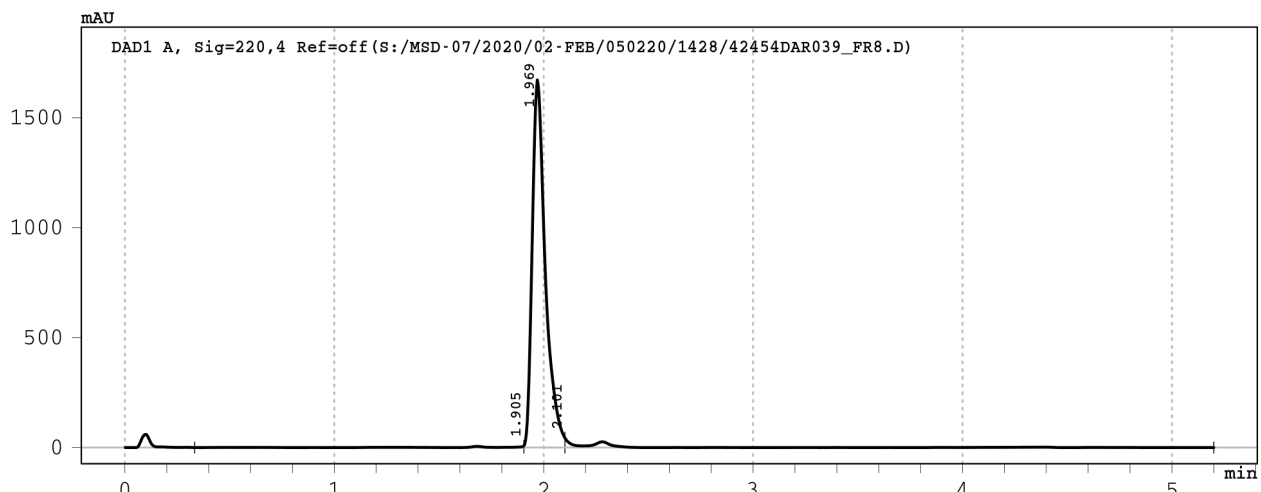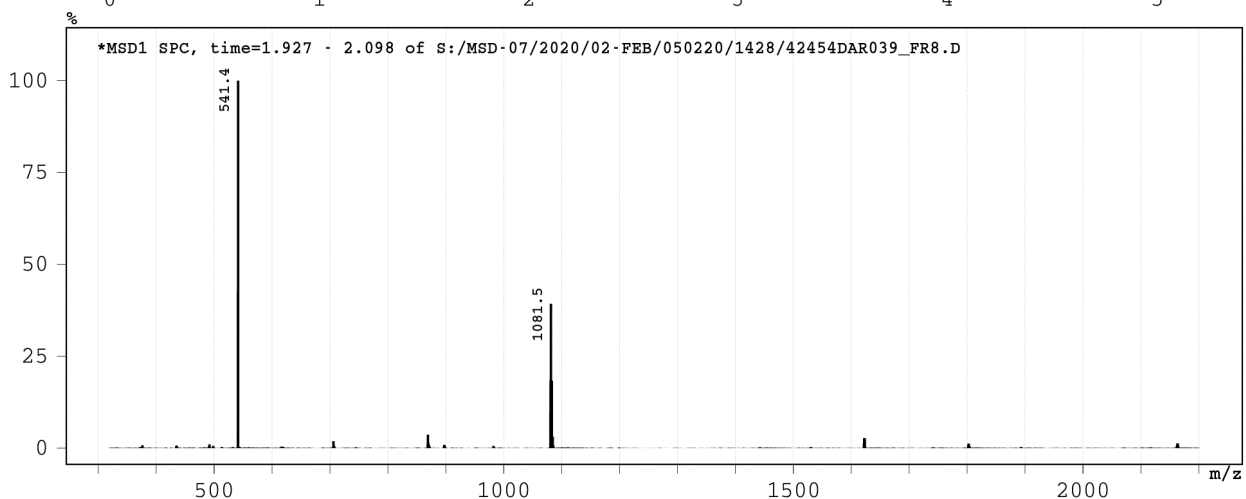

Signal 1: DAD1 A, Sig=220,4 Ref=off

| Peak # | RT [min] | Width [min] | Area   | Area % |
|--------|----------|-------------|--------|--------|
| 1      | 1.905    | 1.57        | 60.9   | 0.8    |
| 2      | 1.969    | 0.20        | 7291.2 | 95.5   |
| 3      | 2.101    | 3.10        | 279.5  | 3.7    |

Data File : S:/MSD-07/2020/02-FEB/050220/1428/42454DAR040\_FR1->  
 Injection Date : 06-Feb-20, 01:09:14  
 Sample Name : 42454DAR040\_FR18-19  
 Remarks : Baseline corrected  
 Acq. Method : D:/METHODS/5-95-6M.M  
 column used : Je\_559  
 Analysis Method : C:/CHEM32/1/METHODS/JPT-LCMS.M



Sample Info : 42454\_040-Dr. Martine Darwish H-VKRTRFLRL-OH

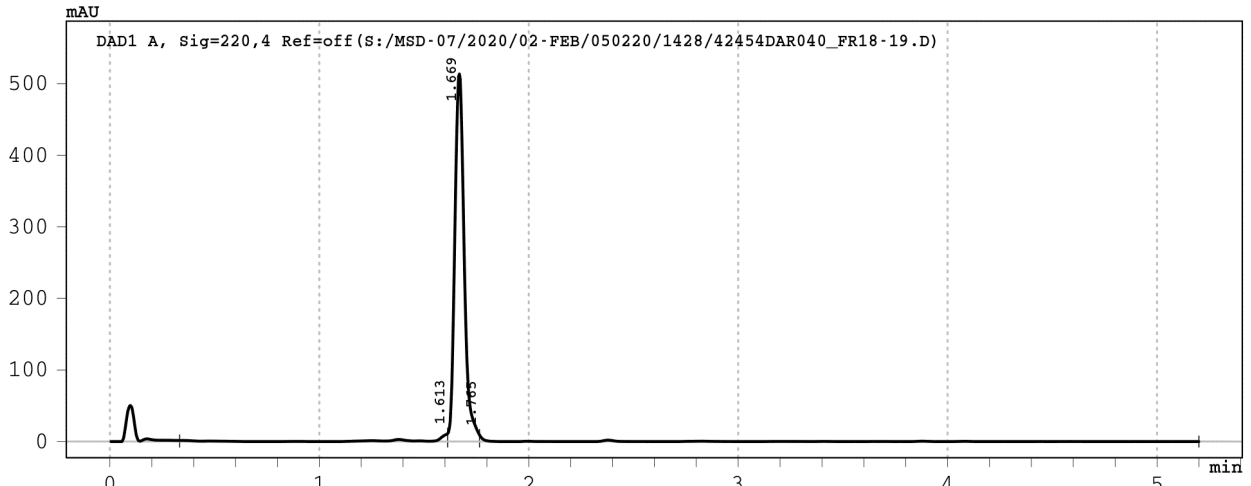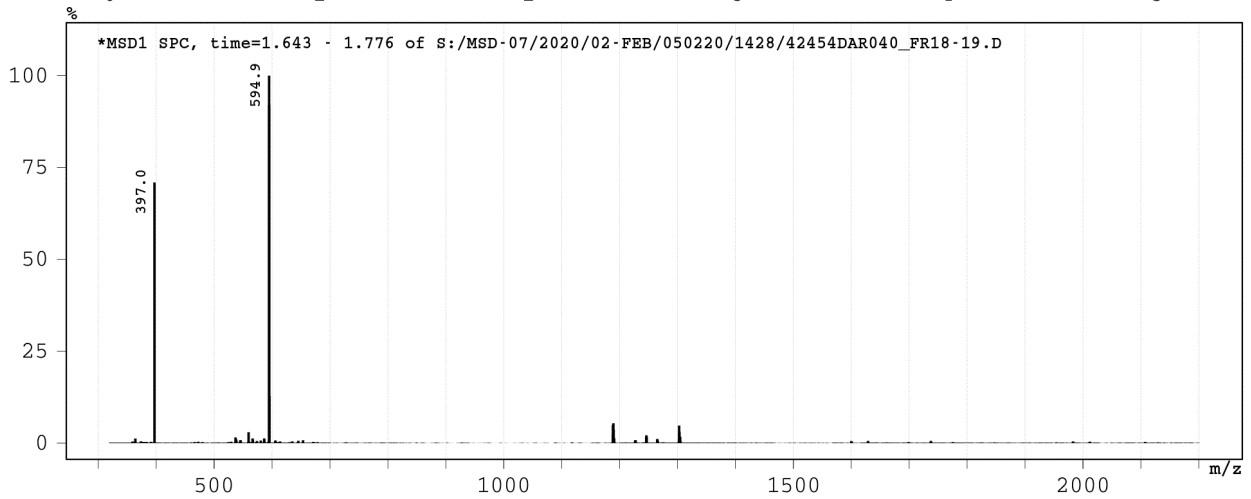

Signal 1: DAD1 A, Sig=220,4 Ref=off

| Peak # | RT [min] | Width [min] | Area   | Area % |
|--------|----------|-------------|--------|--------|
| 1      | 1.613    | 1.28        | 60.5   | 3.6    |
| 2      | 1.669    | 0.15        | 1607.5 | 94.8   |
| 3      | 1.765    | 3.44        | 27.4   | 1.6    |

Data File : S:/MSD-07/2020/02-FEB/050220/1428/42454DAR041\_FR4->



Injection Date : 06-Feb-20, 01:26:08  
Sample Name : 42454DAR041\_FR40  
Remarks : Baseline corrected  
Acq. Method : D:/METHODS/5-95-6M.M  
column used : Je\_559  
Analysis Method : C:/CHEM32/1/METHODS/JPT-LCMS.M

Sample Info : 42454\_041-Dr. Martine Darwish H-YFFEHGSSKL-OH

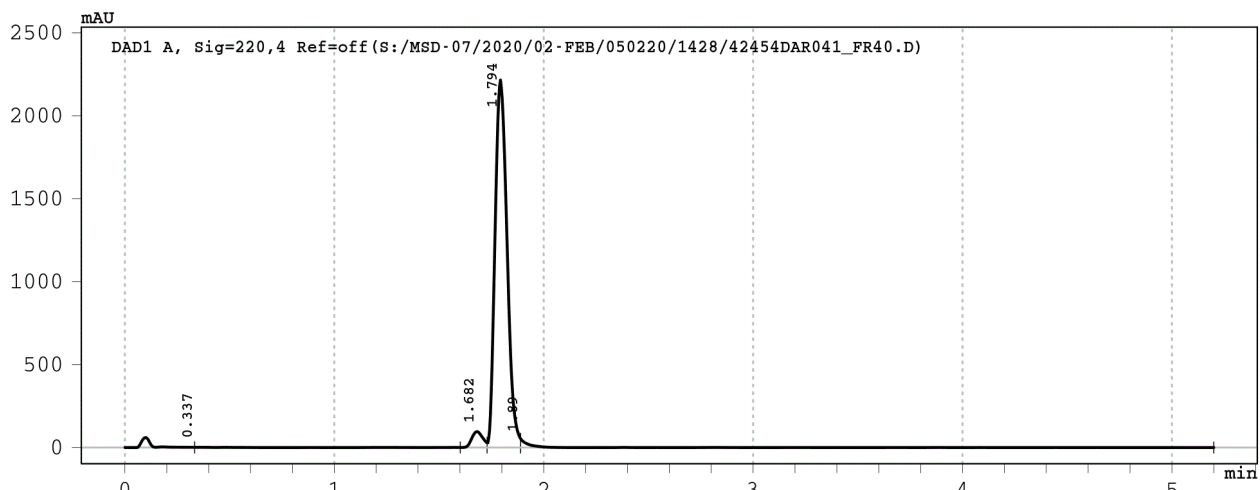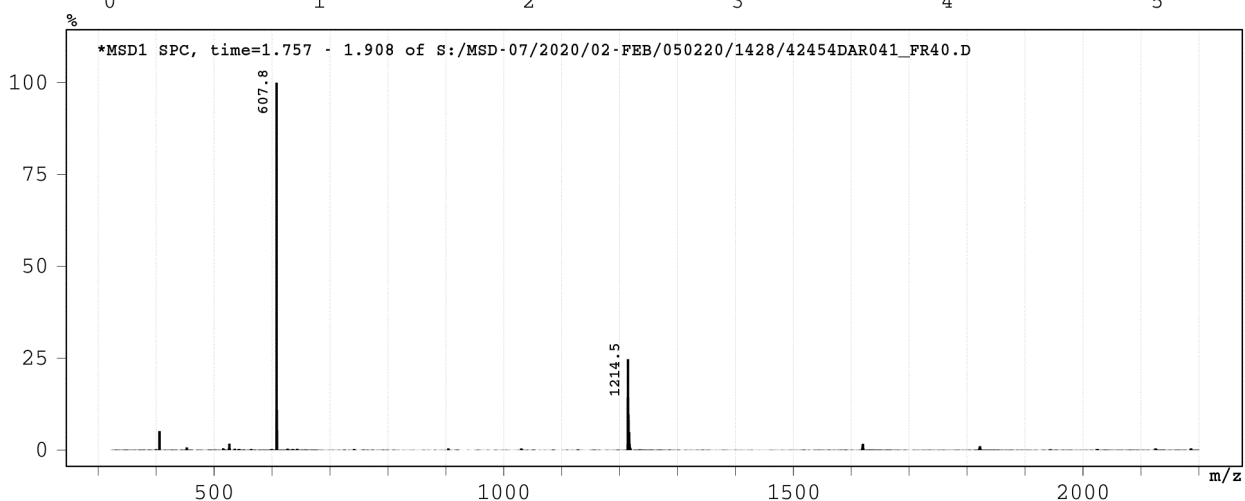

Signal 1: DAD1 A, Sig=220,4 Ref=off

| Peak # | RT [min] | Width [min] | Area   | Area % |
|--------|----------|-------------|--------|--------|
| 1      | 0.337    | 1.27        | 27.2   | 0.3    |
| 2      | 1.682    | 0.13        | 349.5  | 3.7    |
| 3      | 1.794    | 0.16        | 8837.7 | 94.5   |
| 4      | 1.890    | 3.31        | 135.1  | 1.4    |



Data File : S:/MSD-07/2020/02-FEB/050220/1428/42454DAR042\_FR5->



Injection Date : 06-Feb-20, 01:34:38  
Sample Name : 42454DAR042\_FR55-57  
Remarks : Baseline corrected  
Acq. Method : D:/METHODS/5-95-6M.M  
column used : Je\_559  
Analysis Method : C:/CHEM32/1/METHODS/JPT-LCMS.M

Sample Info : 42454\_042-Dr. Martine Darwish H-FQLAFGHL-OH

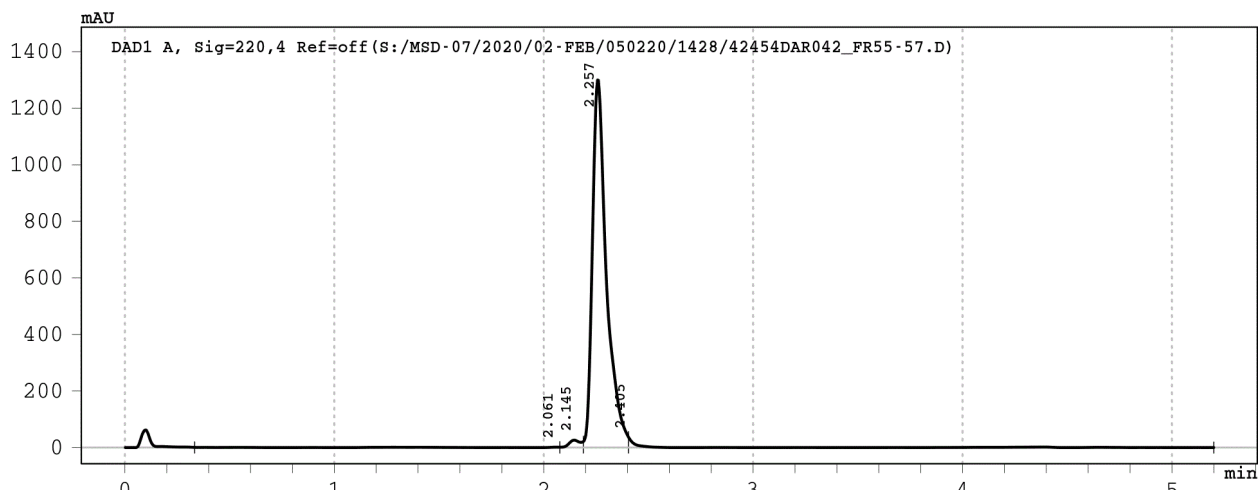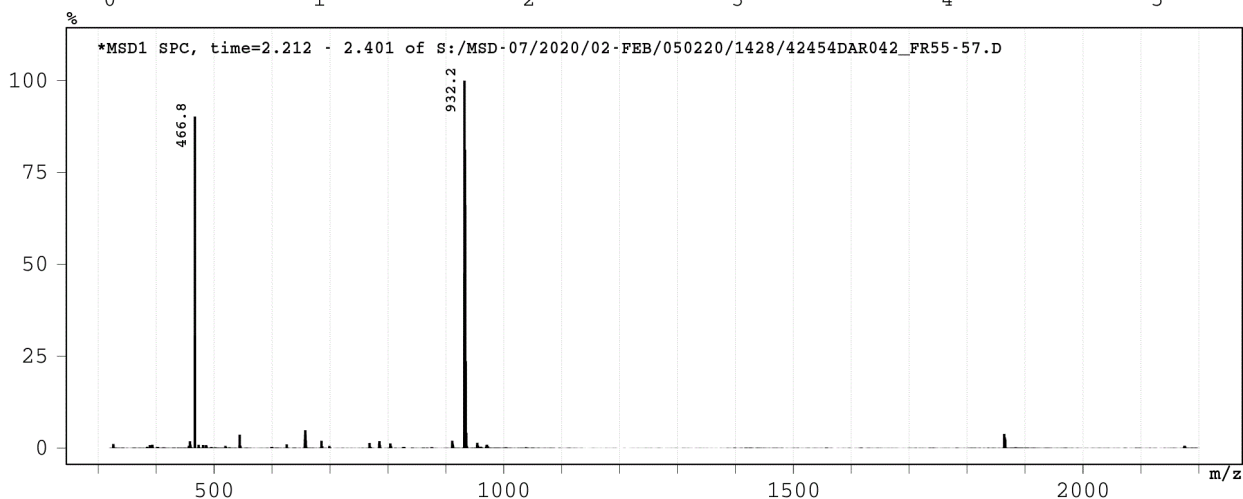

Signal 1: DAD1 A, Sig=220,4 Ref=off

| Peak # | RT [min] | Width [min] | Area   | Area % |
|--------|----------|-------------|--------|--------|
| 1      | 2.061    | 1.74        | 34.8   | 0.6    |
| 2      | 2.145    | 0.11        | 100.8  | 1.6    |
| 3      | 2.257    | 0.22        | 6083.3 | 96.1   |
| 4      | 2.405    | 2.79        | 110.8  | 1.8    |

Data File : S:/MSD-07/2020/02-FEB/050220/1428/42454DAR043\_FR6->



Injection Date : 06-Feb-20, 01:43:10  
Sample Name : 42454DAR043\_FR69-70  
Remarks : Baseline corrected  
Acq. Method : D:/METHODS/5-95-6M.M  
column used : Je\_559  
Analysis Method : C:/CHEM32/1/METHODS/JPT-LCMS.M

Sample Info : 42454\_043-Dr. Martine Darwish H-DAYSHSGF-OH

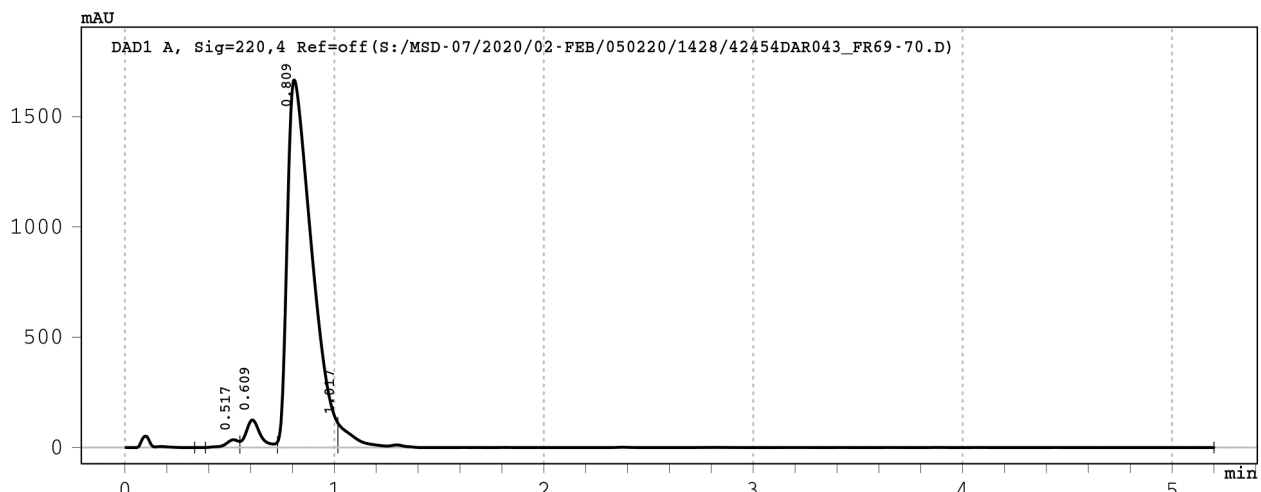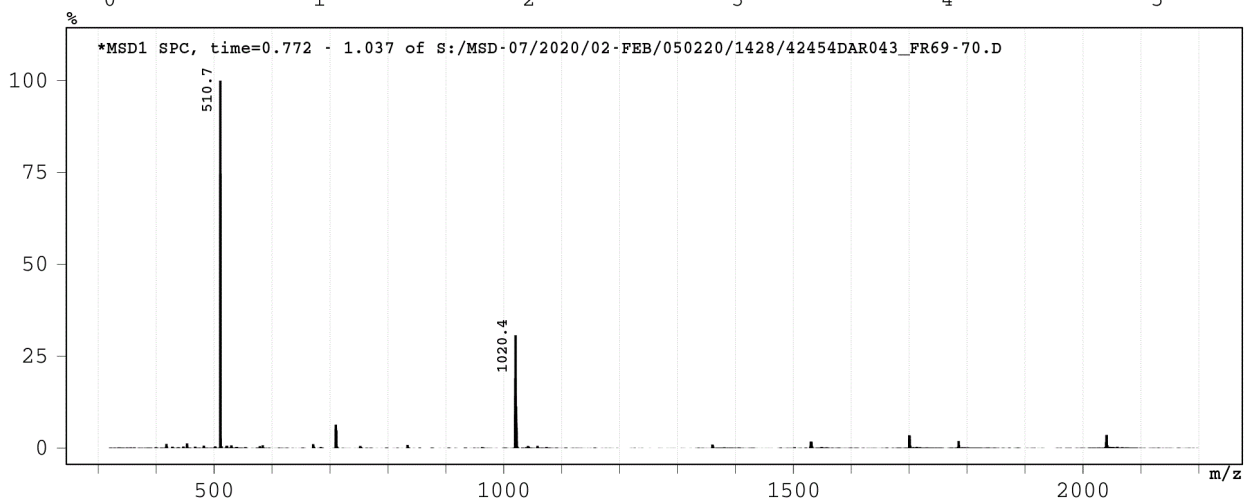

Signal 1: DAD1 A, Sig=220,4 Ref=off

| Peak # | RT [min] | Width [min] | Area    | Area % |
|--------|----------|-------------|---------|--------|
| 1      | 0.337    | 0.05        | 0.0     | 0.0    |
| 2      | 0.517    | 0.16        | 146.3   | 1.0    |
| 3      | 0.609    | 0.18        | 612.1   | 4.1    |
| 4      | 0.809    | 0.29        | 13475.4 | 90.8   |
| 5      | 1.017    | 4.18        | 600.3   | 4.0    |

Data File : S:/MSD-07/2020/02-FEB/050220/1428/42454DAR044\_FR8->

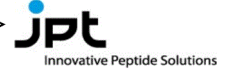

Injection Date : 06-Feb-20, 01:51:37  
Sample Name : 42454DAR044\_FR85  
Remarks : Baseline corrected  
Acq. Method : D:/METHODS/5-95-6M.M  
column used : Je\_559  
Analysis Method : C:/CHEM32/1/METHODS/JPT-LCMS.M

Sample Info : 42454\_044-Dr. Martine Darwish H-AYLGYLAML-OH

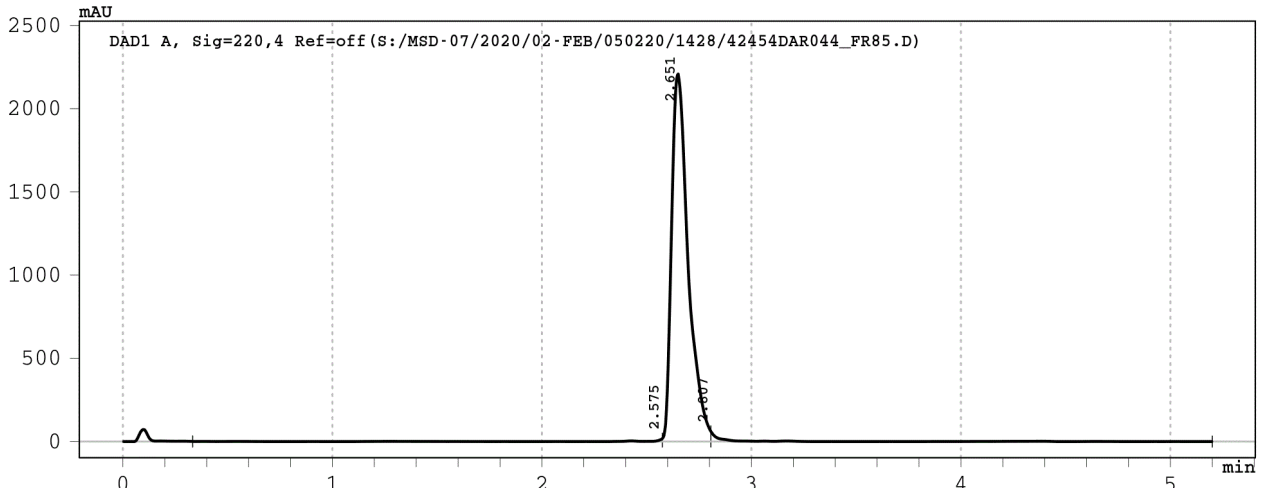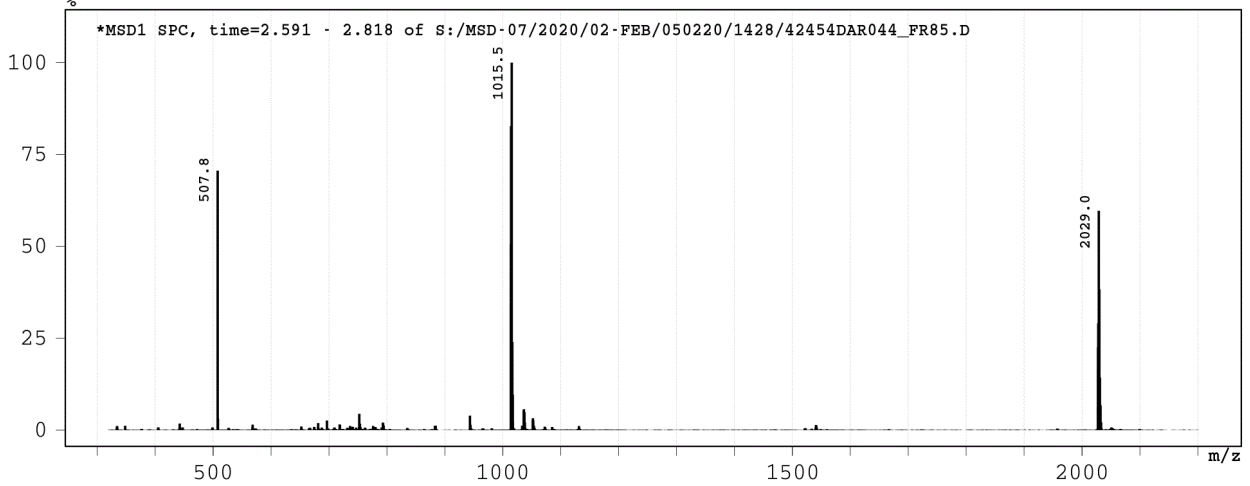

Signal 1: DAD1 A, Sig=220,4 Ref=off

| Peak # | RT [min] | Width [min] | Area    | Area % |
|--------|----------|-------------|---------|--------|
| 1      | 2.575    | 2.24        | 71.7    | 0.6    |
| 2      | 2.651    | 0.23        | 12183.8 | 97.7   |
| 3      | 2.807    | 2.39        | 210.7   | 1.7    |

Data File : S:/MSD-07/2020/02-FEB/050220/1428/42454DAR045\_FR9 ->



Injection Date : 06-Feb-20, 02:00:03  
Sample Name : 42454DAR045\_FR90  
Remarks : Baseline corrected  
Acq. Method : D:/METHODS/5-95-6M.M  
column used : Je\_559  
Analysis Method : C:/CHEM32/1/METHODS/JPT-LCMS.M

Sample Info : 42454\_045-Dr. Martine Darwish H-LSFHLDNIL-OH

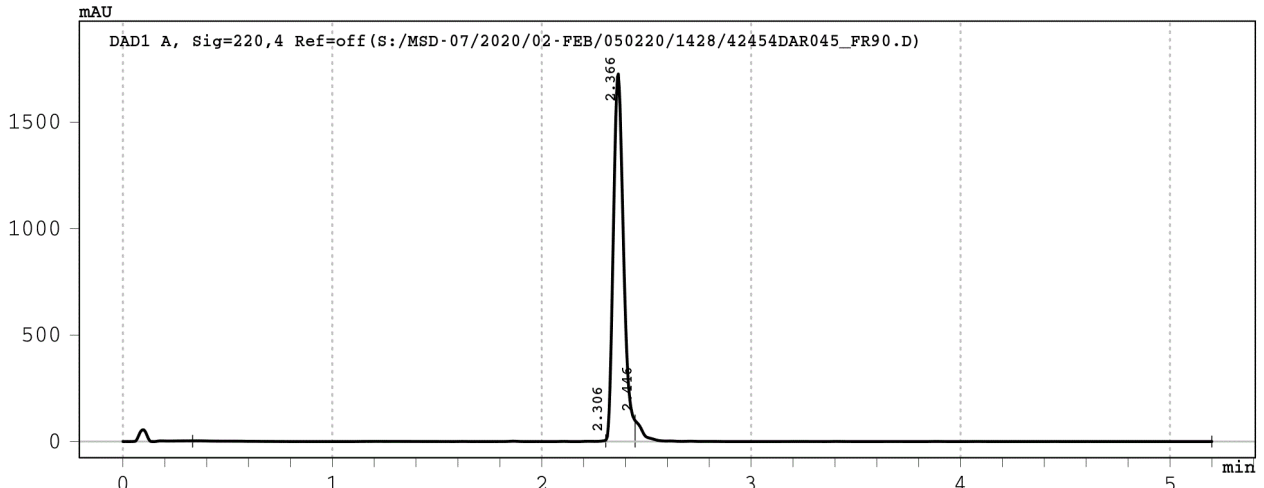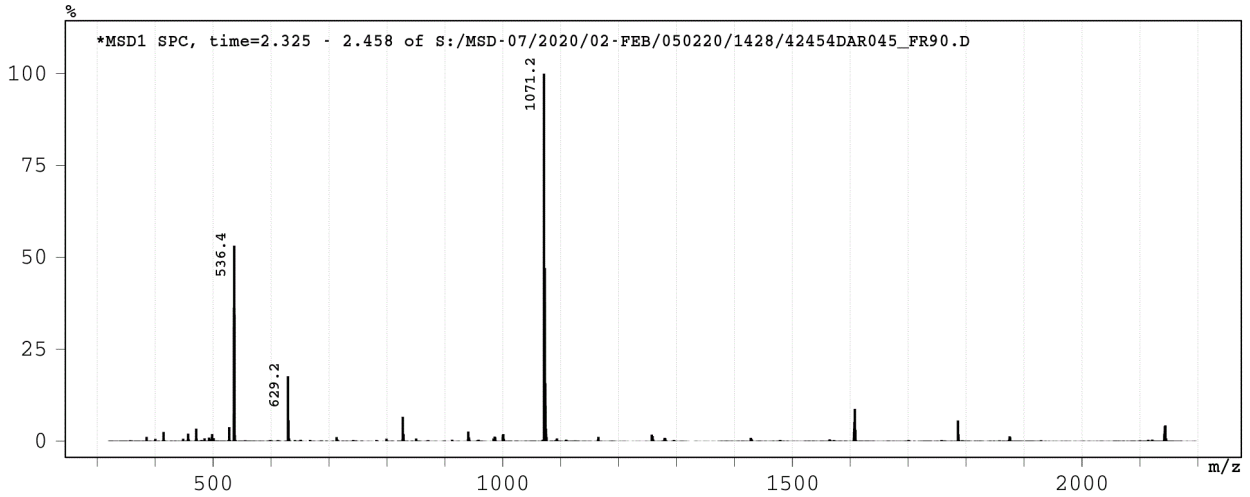

Signal 1: DAD1 A, Sig=220,4 Ref=off

| Peak # | RT [min] | Width [min] | Area   | Area % |
|--------|----------|-------------|--------|--------|
| 1      | 2.306    | 1.97        | 71.4   | 1.1    |
| 2      | 2.366    | 0.14        | 5870.8 | 94.4   |
| 3      | 2.446    | 2.75        | 274.2  | 4.4    |

Data File : S:/MSD-07/2020/02-FEB/040220/1427/42454DAR046\_FR7->



Injection Date : 04-Feb-20, 17:30:58  
Sample Name : 42454DAR046\_FR73-75  
Remarks : Baseline corrected  
Acq. Method : D:/METHODS/5-95-6M.M  
column used : Je\_559  
Analysis Method : C:/CHEM32/1/METHODS/JPT-LCMS.M

Sample Info : 42454\_046-Dr. Martine Darwish H-ASFHAAFL-OH

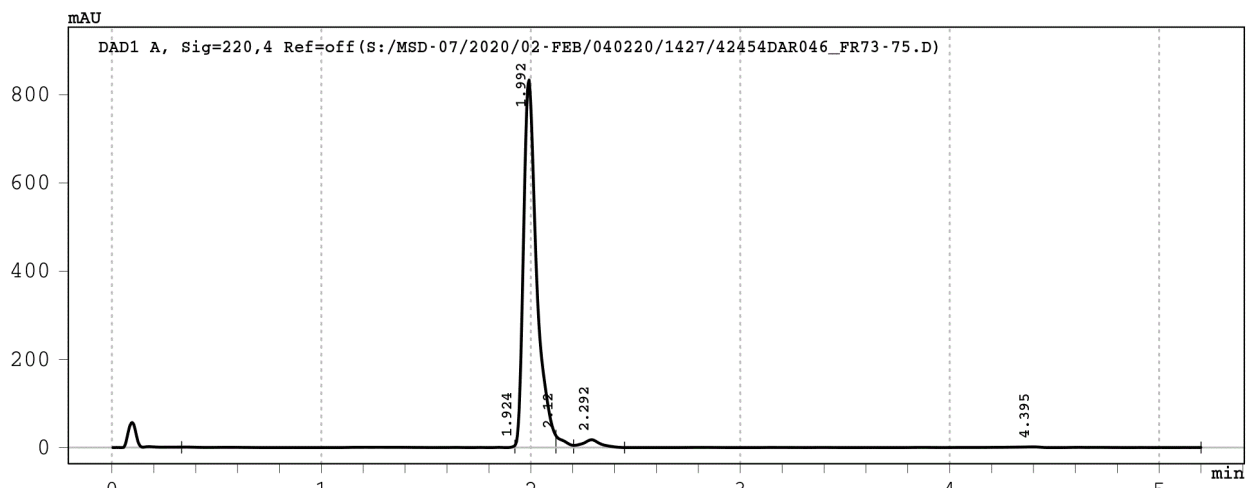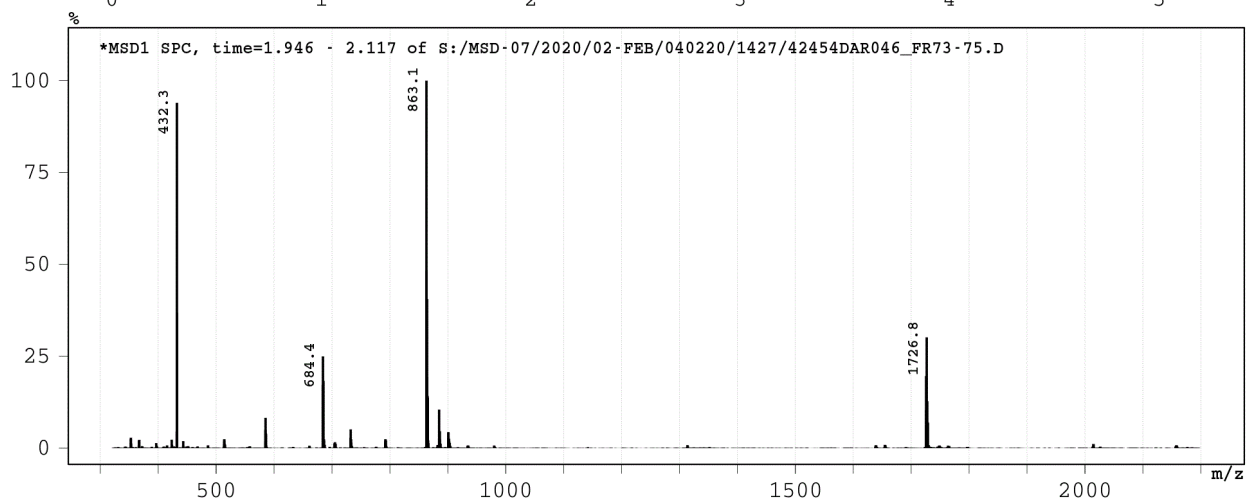

Signal 1: DAD1 A, Sig=220,4 Ref=off

| Peak # | RT [min] | Width [min] | Area   | Area % |
|--------|----------|-------------|--------|--------|
| 1      | 1.924    | 1.59        | 26.5   | 0.7    |
| 2      | 1.992    | 0.20        | 3645.5 | 94.1   |
| 3      | 2.120    | 0.08        | 68.9   | 1.8    |
| 4      | 2.292    | 0.24        | 105.6  | 2.7    |
| 5      | 4.395    | 2.75        | 28.3   | 0.7    |

Data File : S:/MSD-07/2020/02-FEB/050220/1428/42454DAR047\_FR9->

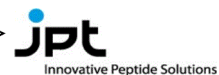

Injection Date : 05-Feb-20, 15:29:11  
Sample Name : 42454DAR047\_FR9-10  
Remarks : Baseline corrected  
Acq. Method : D:/METHODS/5-95-6M.M  
column used : Je\_559  
Analysis Method : C:/CHEM32/1/METHODS/JPT-LCMS.M

Sample Info : 42454\_047-Dr. Martine Darwish H-LGVCMYGML-OH

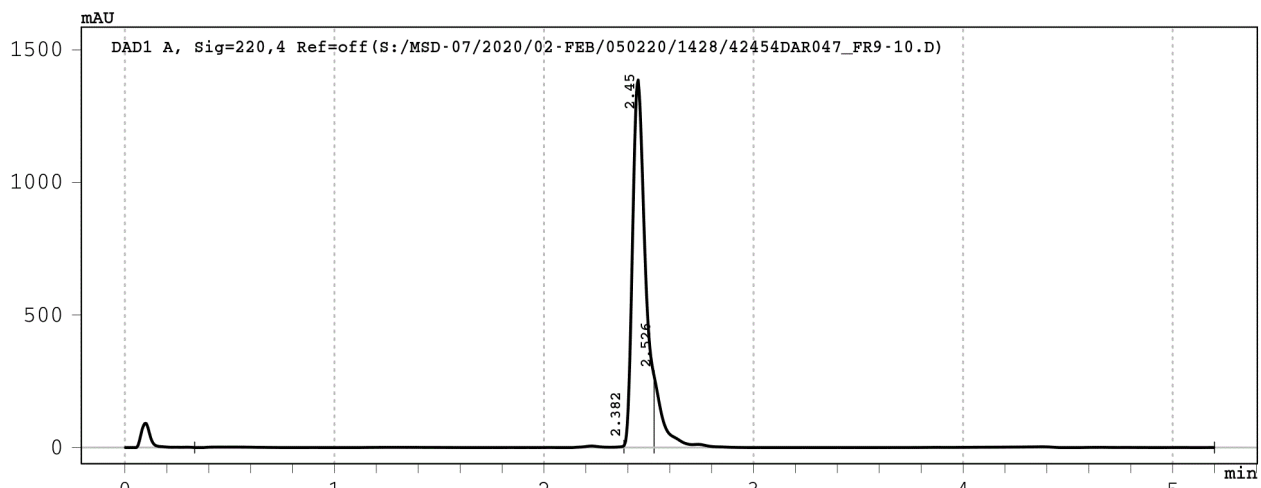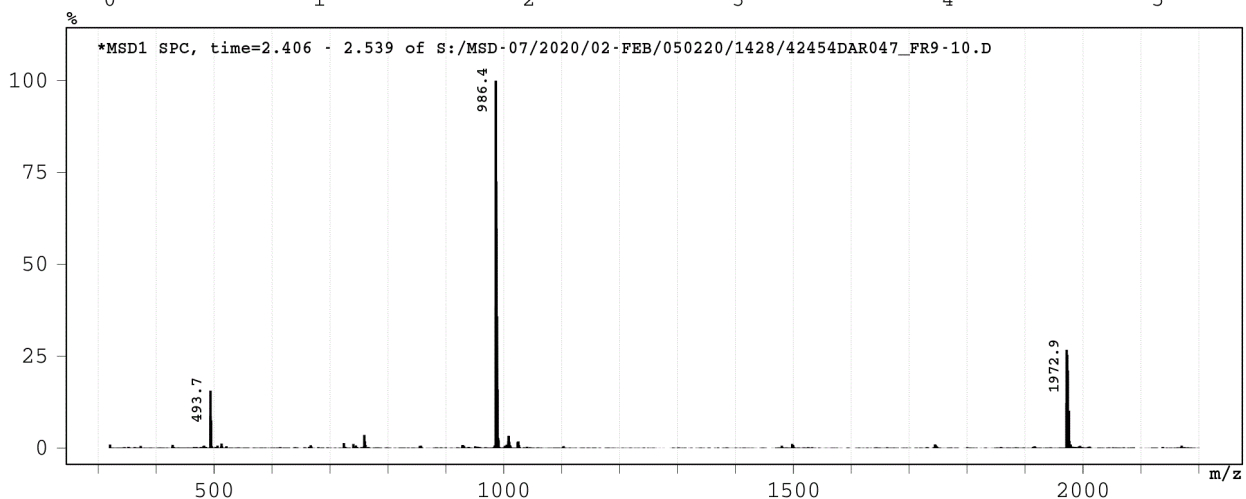

Signal 1: DAD1 A, Sig=220,4 Ref=off

| Peak # | RT [min] | Width [min] | Area   | Area % |
|--------|----------|-------------|--------|--------|
| 1      | 2.382    | 2.05        | 81.0   | 1.2    |
| 2      | 2.450    | 0.14        | 5762.4 | 85.4   |
| 3      | 2.526    | 2.67        | 902.3  | 13.4   |

Data File : S:/MSD-07/2020/02-FEB/050220/1428/42454DAR048\_FR1->



Injection Date : 05-Feb-20, 15:37:35  
Sample Name : 42454DAR048\_FR16-17  
Remarks : Baseline corrected  
Acq. Method : D:/METHODS/5-95-6M.M  
column used : Je\_559  
Analysis Method : C:/CHEM32/1/METHODS/JPT-LCMS.M

Sample Info : 42454\_048-Dr. Martine Darwish H-TAYHARIL-OH

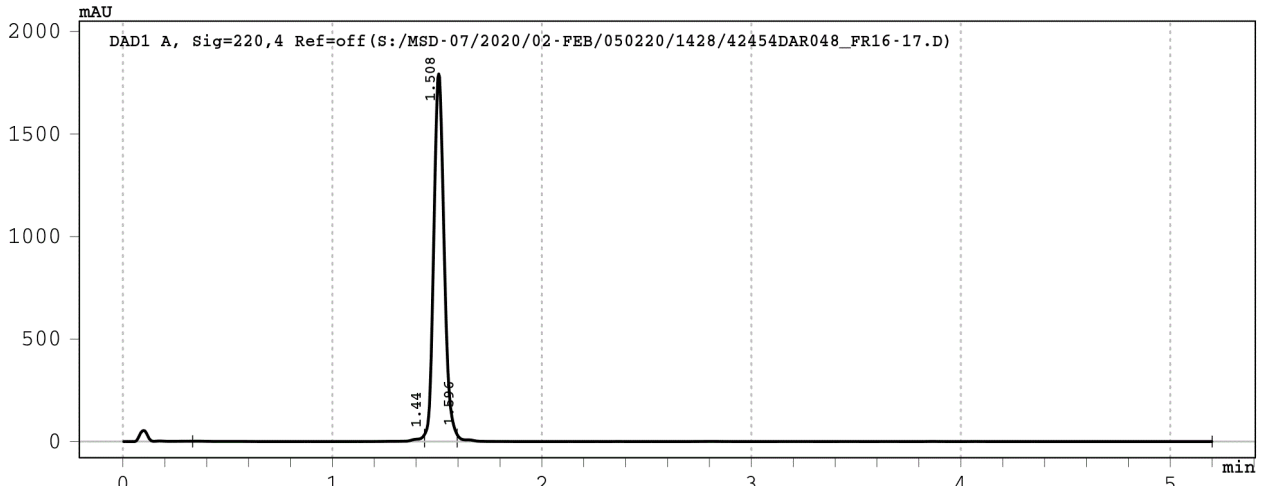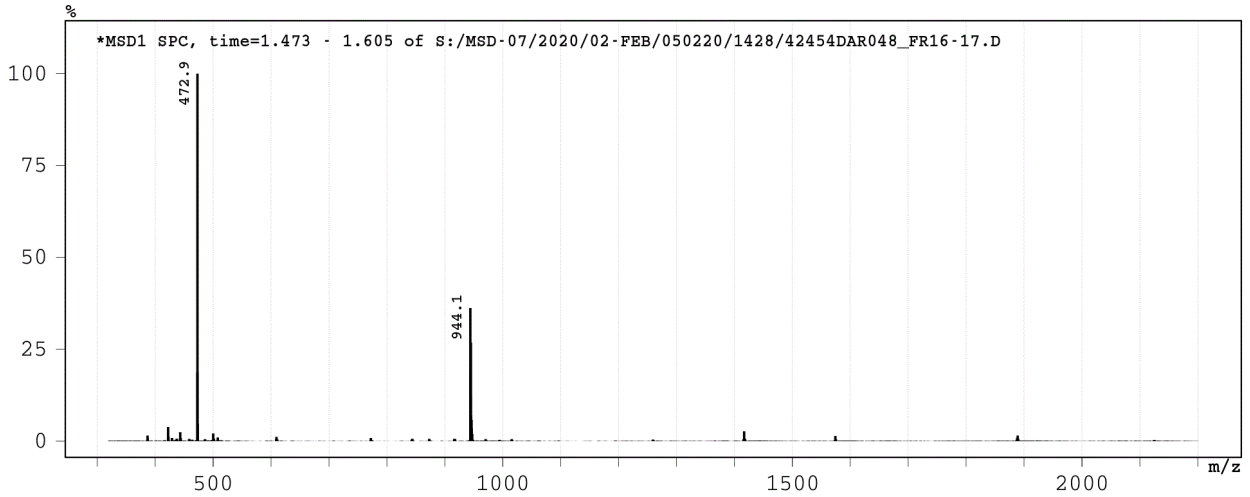

Signal 1: DAD1 A, Sig=220,4 Ref=off

| Peak # | RT [min] | Width [min] | Area   | Area % |
|--------|----------|-------------|--------|--------|
| 1      | 1.440    | 1.11        | 82.0   | 1.3    |
| 2      | 1.508    | 0.16        | 6172.1 | 97.5   |
| 3      | 1.596    | 3.60        | 73.7   | 1.2    |

Data File : S:/MSD-07/2020/02-FEB/050220/1428/42454DAR049\_FR3 ->



Injection Date : 05-Feb-20, 15:45:59  
Sample Name : 42454DAR049\_FR32-33  
Remarks : Baseline corrected  
Acq. Method : D:/METHODS/5-95-6M.M  
column used : Je\_559  
Analysis Method : C:/CHEM32/1/METHODS/JPT-LCMS.M

Sample Info : 42454\_049-Dr. Martine Darwish H-LAPYFLSEPL-OH

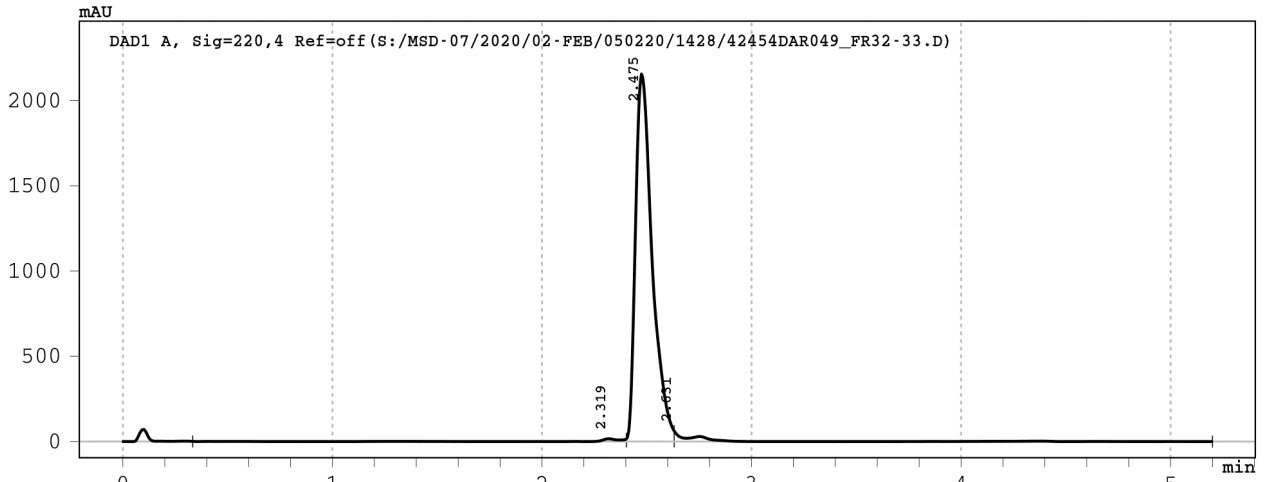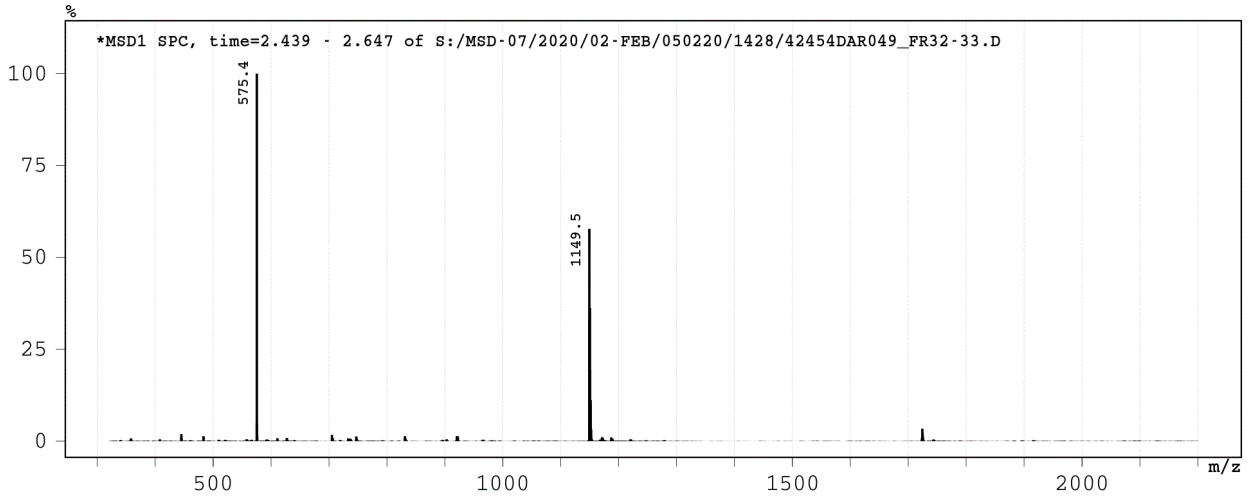

Signal 1: DAD1 A, Sig=220,4 Ref=off

| Peak # | RT [min] | Width [min] | Area    | Area % |
|--------|----------|-------------|---------|--------|
| 1      | 2.319    | 2.07        | 125.4   | 1.0    |
| 2      | 2.475    | 0.23        | 11946.7 | 96.1   |
| 3      | 2.631    | 2.57        | 365.0   | 2.9    |



Data File : S:/MSD-07/2020/02-FEB/050220/1428/42454DAR050\_FR4->  
 Injection Date : 05-Feb-20, 15:54:23  
 Sample Name : 42454DAR050\_FR48-49  
 Remarks : Baseline corrected  
 Acq. Method : D:/METHODS/5-95-6M.M  
 column used : Je\_559  
 Analysis Method : C:/CHEM32/1/METHODS/JPT-LCMS.M



Sample Info : 42454\_050-Dr. Martine Darwish H-KIHQNLEEM-OH

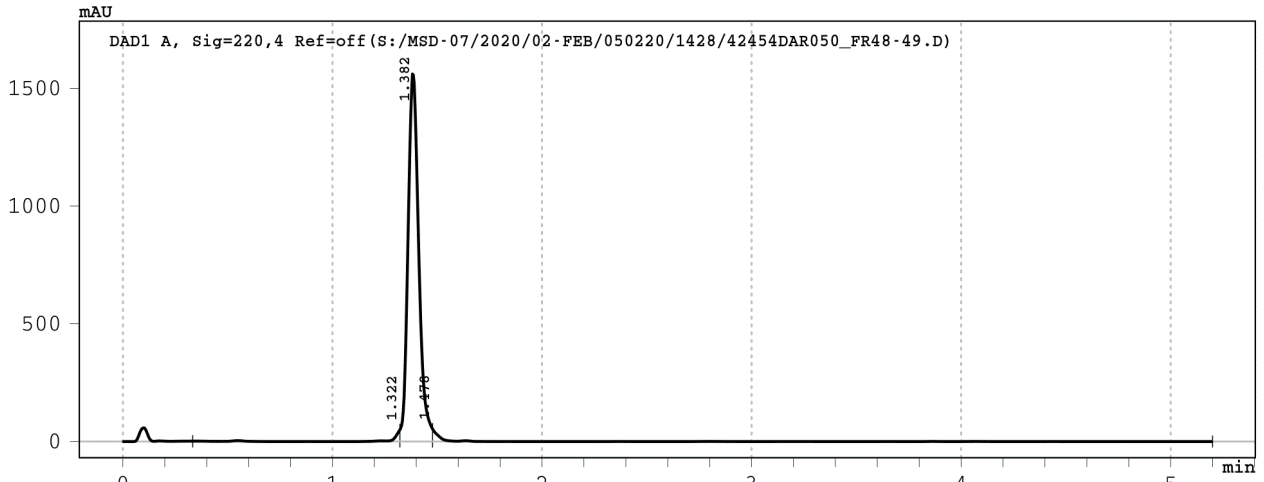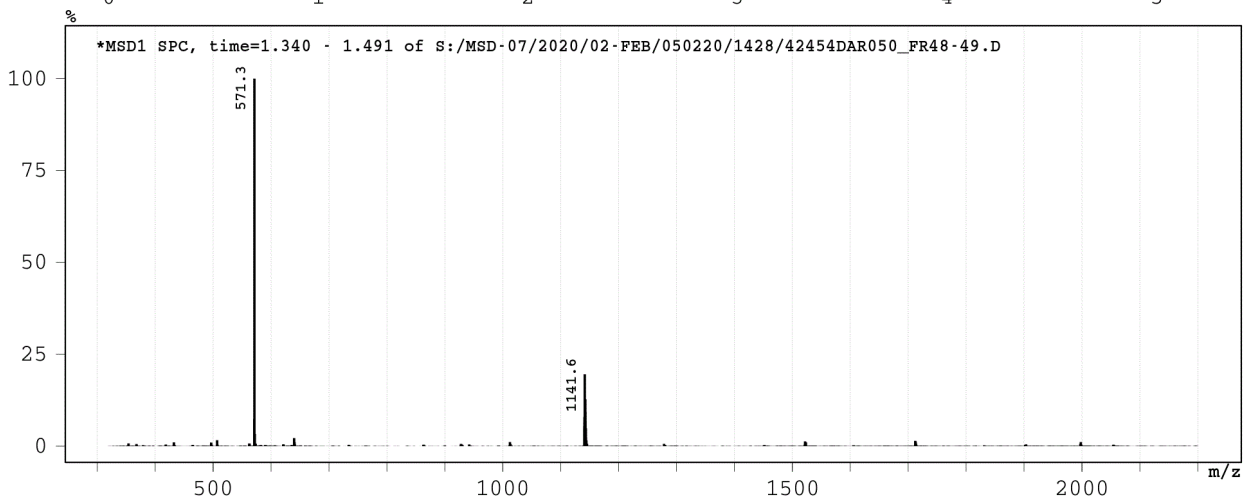

Signal 1: DAD1 A, Sig=220,4 Ref=off

| Peak # | RT [min] | Width [min] | Area   | Area % |
|--------|----------|-------------|--------|--------|
| 1      | 1.322    | 0.99        | 102.8  | 1.8    |
| 2      | 1.382    | 0.16        | 5570.2 | 96.1   |
| 3      | 1.478    | 3.72        | 123.6  | 2.1    |

Data File : S:/MSD-07/2020/02-FEB/050220/1428/42454DAR051\_FR5->



Injection Date : 05-Feb-20, 16:02:47  
Sample Name : 42454DAR051\_FR56-57  
Remarks : Baseline corrected  
Acq. Method : D:/METHODS/5-95-6M.M  
column used : Je\_559  
Analysis Method : C:/CHEM32/1/METHODS/JPT-LCMS.M

Sample Info : 42454\_051-Dr. Martine Darwish H-CSYLPELPL-OH

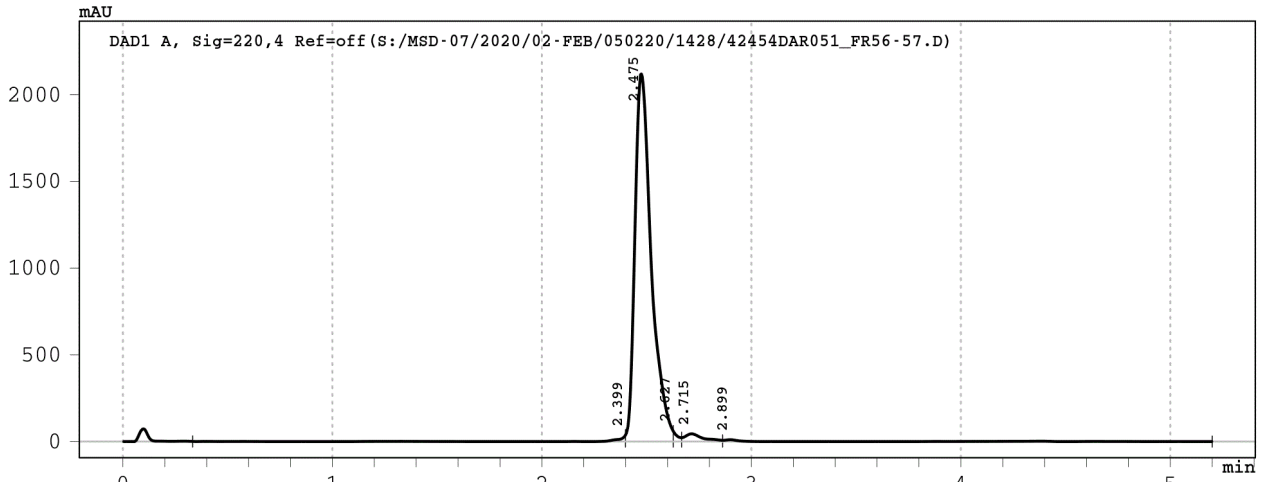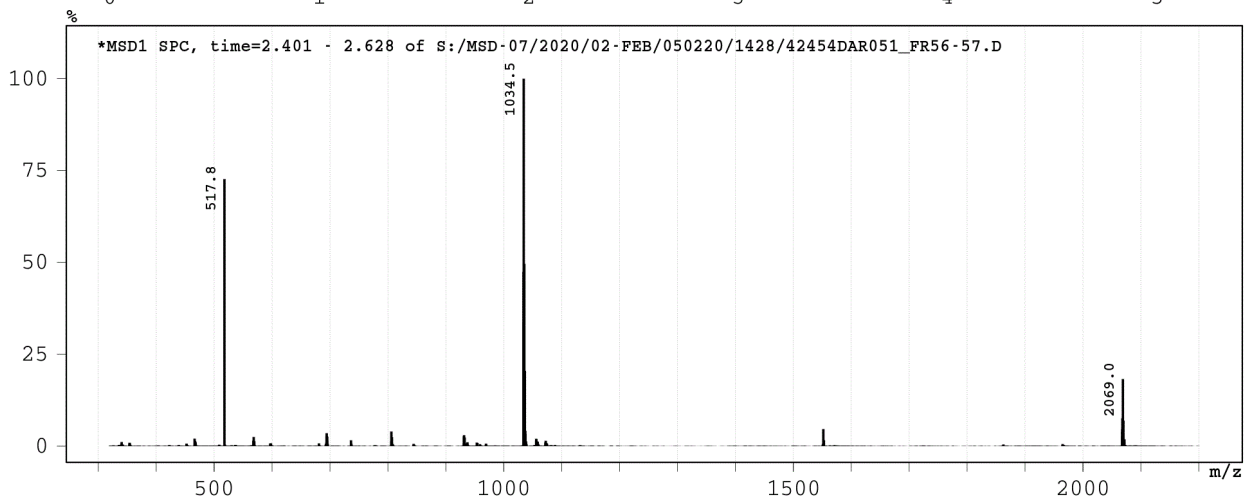

Signal 1: DAD1 A, Sig=220,4 Ref=off

| Peak # | RT [min] | Width [min] | Area    | Area % |
|--------|----------|-------------|---------|--------|
| 1      | 2.399    | 2.07        | 98.0    | 0.8    |
| 2      | 2.475    | 0.23        | 11530.1 | 95.5   |
| 3      | 2.627    | 0.04        | 82.2    | 0.7    |
| 4      | 2.715    | 0.20        | 272.8   | 2.3    |
| 5      | 2.899    | 2.34        | 92.0    | 0.8    |

Data File : S:/MSD-07/2020/02-FEB/050220/1428/42454DAR052\_FR6->  
 Injection Date : 05-Feb-20, 16:11:11  
 Sample Name : 42454DAR052\_FR64-66  
 Remarks : Baseline corrected  
 Acq. Method : D:/METHODS/5-95-6M.M  
 column used : Je\_559  
 Analysis Method : C:/CHEM32/1/METHODS/JPT-LCMS.M



Sample Info : 42454\_052-Dr. Martine Darwish H-VSPVNDLDV-OH

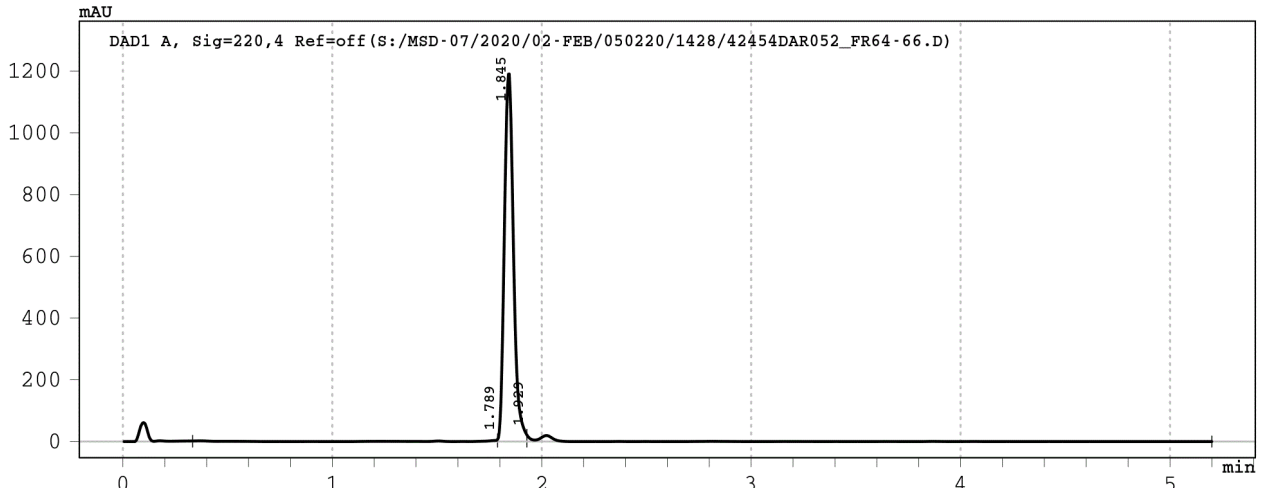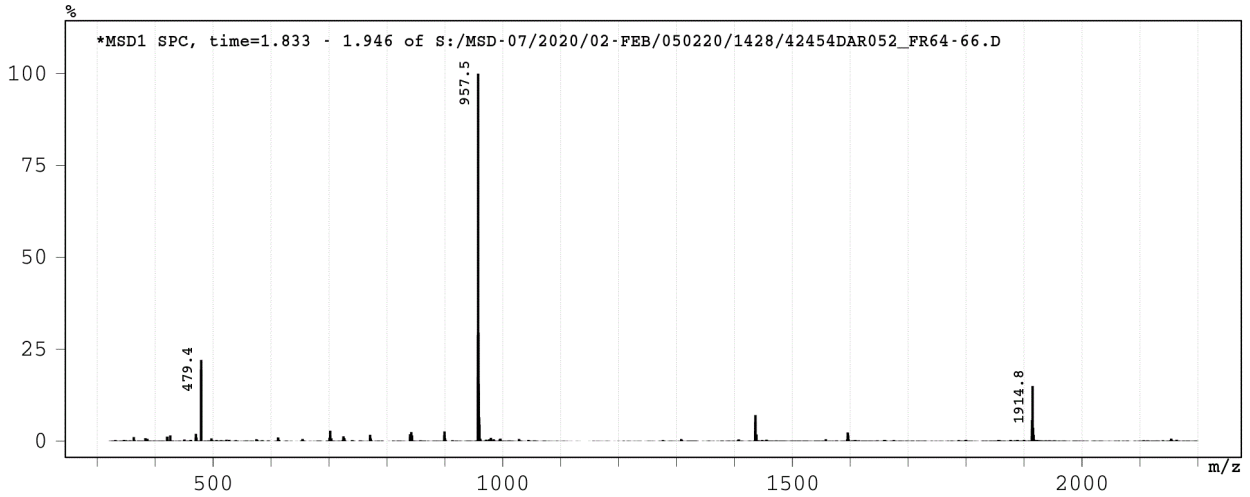

Signal 1: DAD1 A, Sig=220,4 Ref=off

| Peak # | RT [min] | Width [min] | Area   | Area % |
|--------|----------|-------------|--------|--------|
| 1      | 1.789    | 1.46        | 48.3   | 1.3    |
| 2      | 1.845    | 0.14        | 3612.3 | 95.7   |
| 3      | 1.929    | 3.27        | 112.9  | 3.0    |

Data File : S:/MSD-07/2020/02-FEB/050220/1428/42454DAR053\_FR7->  
 Injection Date : 05-Feb-20, 16:19:35  
 Sample Name : 42454DAR053\_FR70-71  
 Remarks : Baseline corrected  
 Acq. Method : D:/METHODS/5-95-6M.M  
 column used : Je\_559  
 Analysis Method : C:/CHEM32/1/METHODS/JPT-LCMS.M



Sample Info : 42454\_053-Dr. Martine Darwish H-PMTKNTQYI-OH

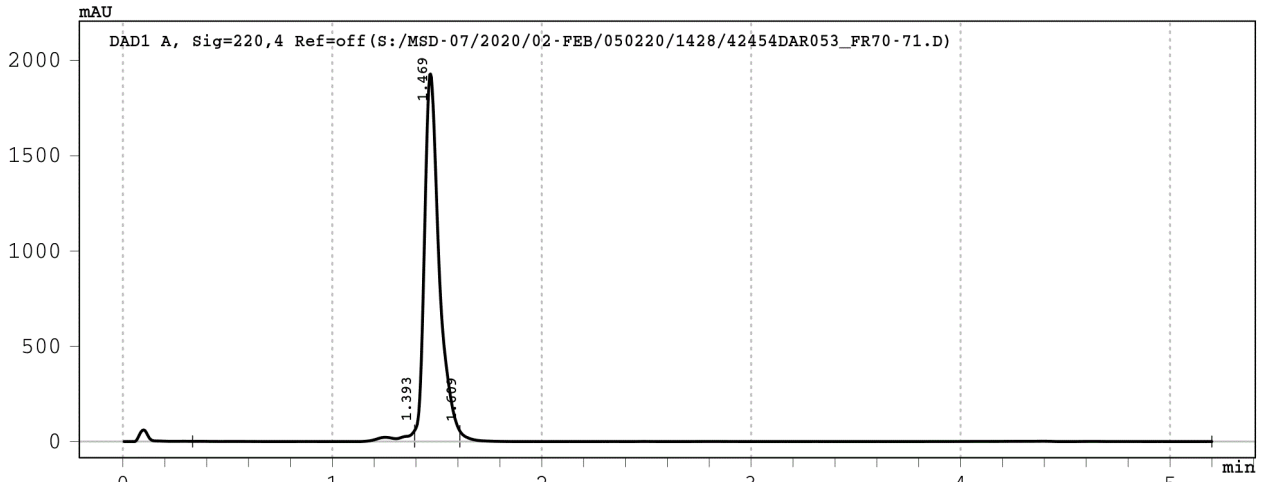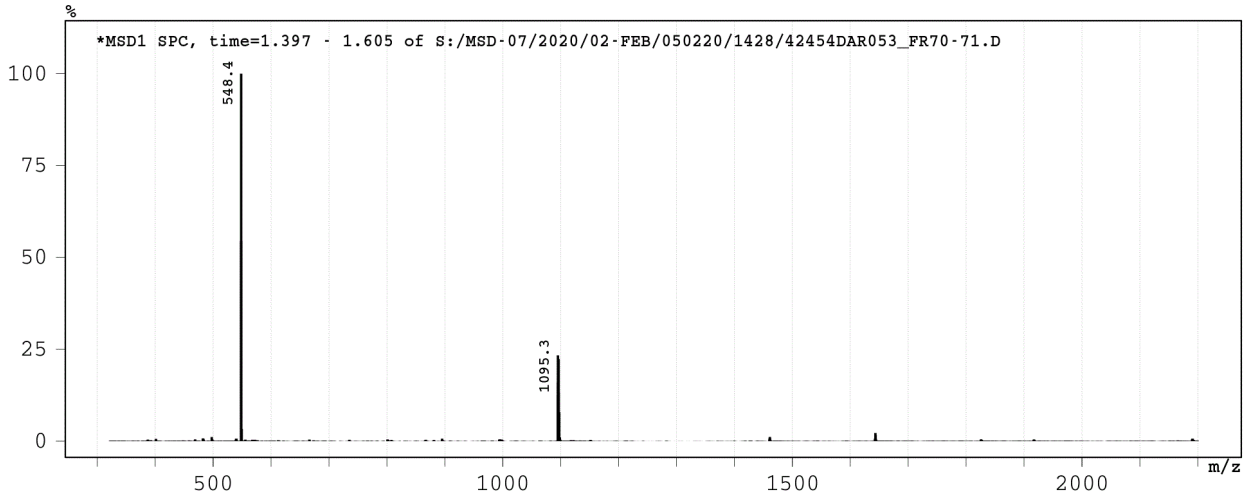

Signal 1: DAD1 A, Sig=220,4 Ref=off

| Peak # | RT [min] | Width [min] | Area   | Area % |
|--------|----------|-------------|--------|--------|
| 1      | 1.393    | 1.06        | 285.6  | 2.9    |
| 2      | 1.469    | 0.22        | 9430.6 | 95.4   |
| 3      | 1.609    | 3.59        | 168.2  | 1.7    |

Data File : S:/MSD-07/2020/02-FEB/050220/1428/42454DAR054\_FR2->



Injection Date : 05-Feb-20, 16:27:59  
Sample Name : 42454DAR054\_FR2-3  
Remarks : Baseline corrected  
Acq. Method : D:/METHODS/5-95-6M.M  
column used : Je\_559  
Analysis Method : C:/CHEM32/1/METHODS/JPT-LCMS.M

Sample Info : 42454\_054-Dr. Martine Darwish H-LAL/DLQYI-OH

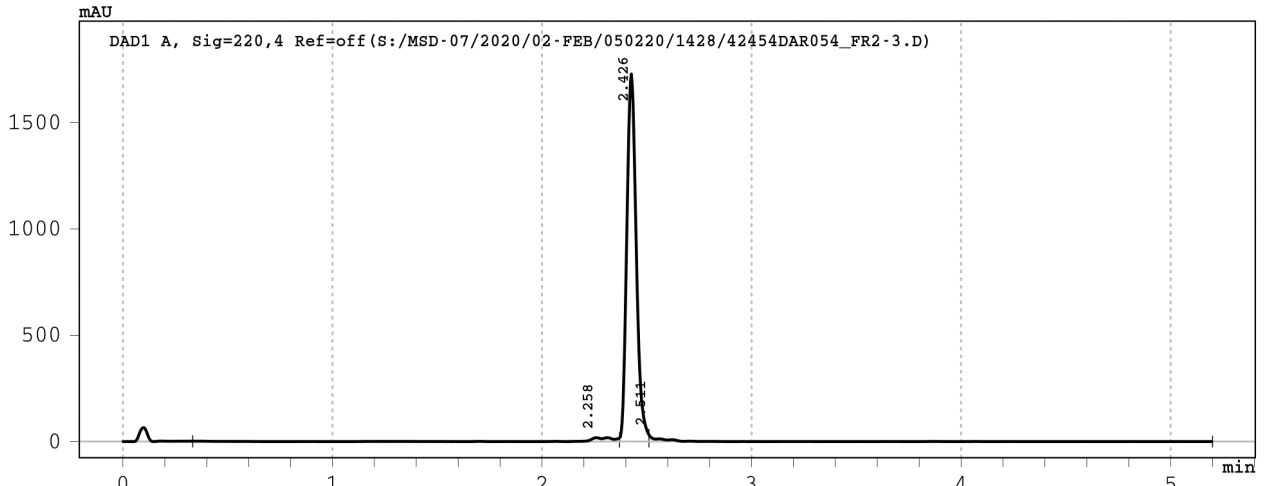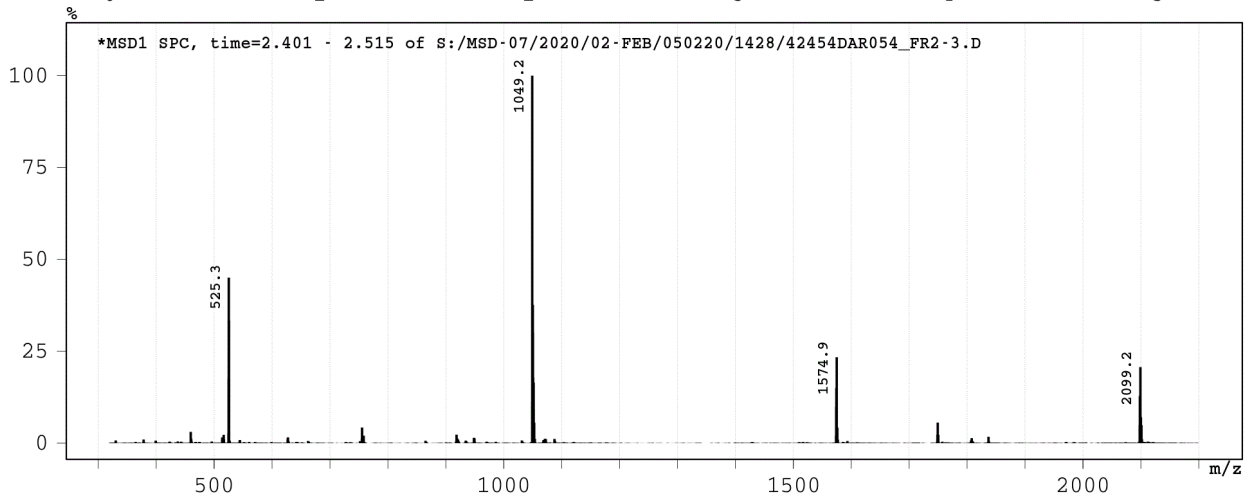

Signal 1: DAD1 A, Sig=220,4 Ref=off

| Peak # | RT [min] | Width [min] | Area   | Area % |
|--------|----------|-------------|--------|--------|
| 1      | 2.258    | 2.04        | 164.2  | 2.9    |
| 2      | 2.426    | 0.14        | 5424.0 | 95.2   |
| 3      | 2.511    | 2.69        | 109.3  | 1.9    |

Data File : S:/MSD-07/2020/02-FEB/070220/1430/42454DAR055\_FR3 ->  
 Injection Date : 07-Feb-20, 13:29:38  
 Sample Name : 42454DAR055\_FR30-32  
 Remarks : Baseline corrected  
 Acq. Method : D:/METHODS/5-95-6M.M  
 column used : Je\_559  
 Analysis Method : C:/CHEM32/1/METHODS/JPT-LCMS.M



Sample Info : 42454\_055-Dr. Martine Darwish H-QLYLLCCQL-OH

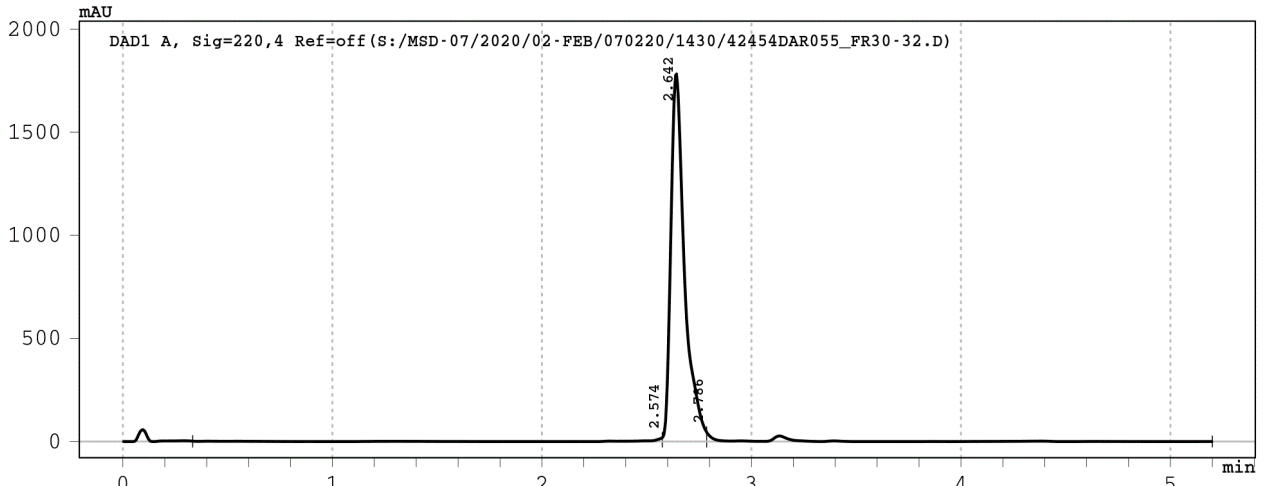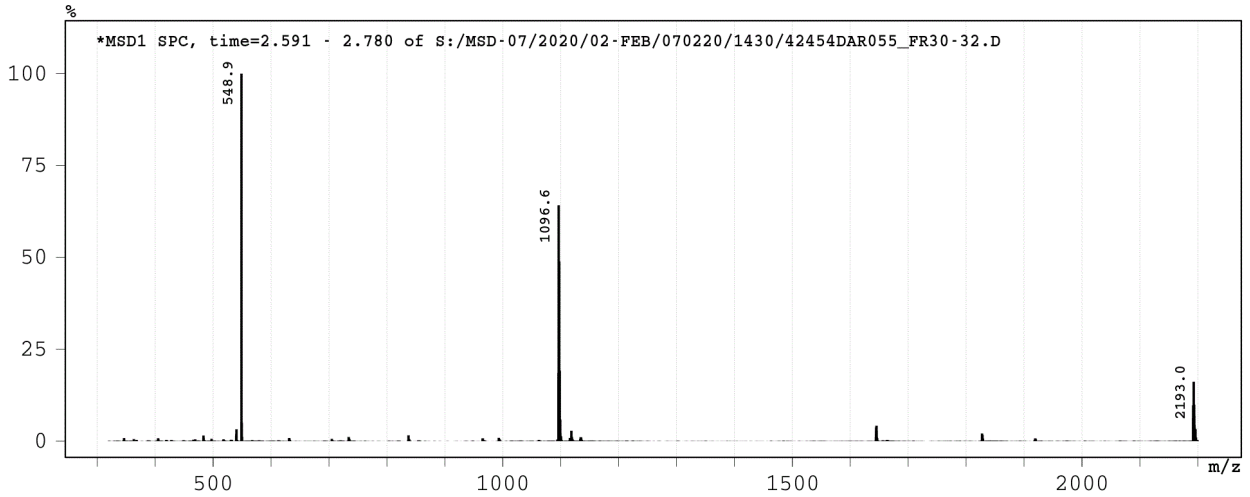

Signal 1: DAD1 A, Sig=220,4 Ref=off

| Peak # | RT [min] | Width [min] | Area   | Area % |
|--------|----------|-------------|--------|--------|
| 1      | 2.574    | 2.24        | 111.5  | 1.3    |
| 2      | 2.642    | 0.21        | 8114.5 | 95.4   |
| 3      | 2.786    | 2.41        | 277.0  | 3.3    |

Data File : S:/MSD-07/2020/02-FEB/050220/1428/42454DAR056\_FR1->  
 Injection Date : 05-Feb-20, 16:36:23  
 Sample Name : 42454DAR056\_FR15-16  
 Remarks : Baseline corrected  
 Acq. Method : D:/METHODS/5-95-6M.M  
 column used : Je\_559  
 Analysis Method : C:/CHEM32/1/METHODS/JPT-LCMS.M



Sample Info : 42454\_056-Dr. Martine Darwish H-MSYFLQGTL-OH

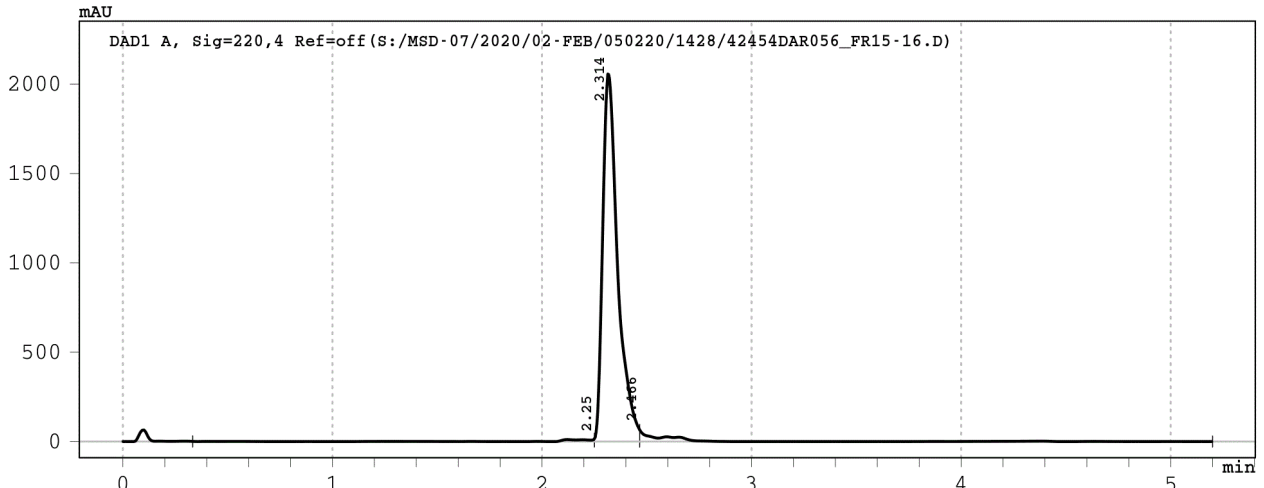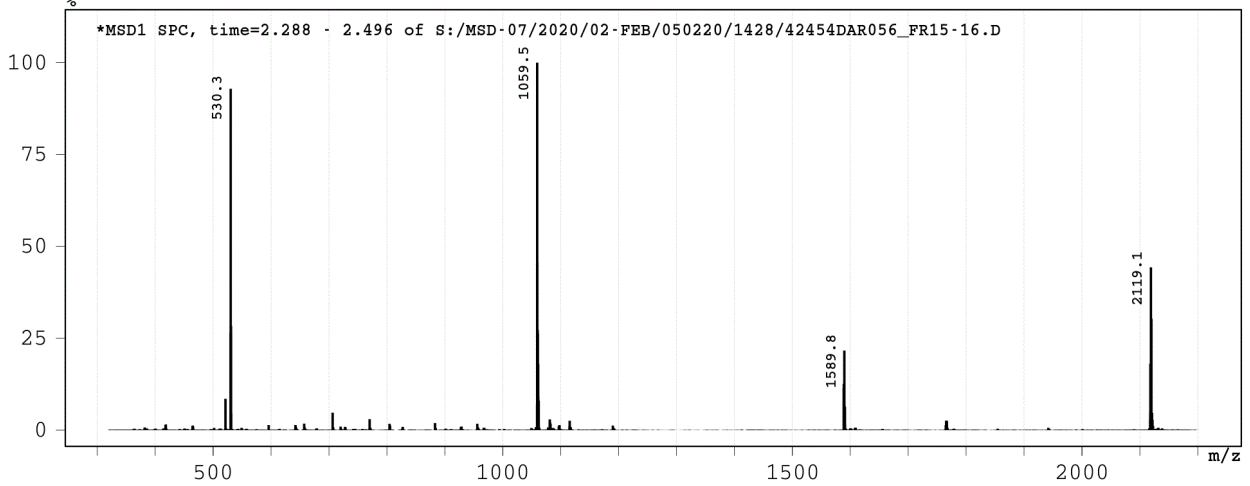

Signal 1: DAD1 A, Sig=220,4 Ref=off

| Peak # | RT [min] | Width [min] | Area    | Area % |
|--------|----------|-------------|---------|--------|
| 1      | 2.250    | 1.92        | 124.6   | 1.2    |
| 2      | 2.314    | 0.22        | 10264.9 | 94.8   |
| 3      | 2.466    | 2.73        | 440.9   | 4.1    |

Data File : S:/MSD-07/2020/02-FEB/050220/1428/42454DAR057\_FR1->  
 Injection Date : 05-Feb-20, 16:44:46  
 Sample Name : 42454DAR057\_FR12-14  
 Remarks : Baseline corrected  
 Acq. Method : D:/METHODS/5-95-6M.M  
 column used : Je\_559  
 Analysis Method : C:/CHEM32/1/METHODS/JPT-LCMS.M



Sample Info : 42454\_057-Dr. Martine Darwish H-IMLQYHAL-OH

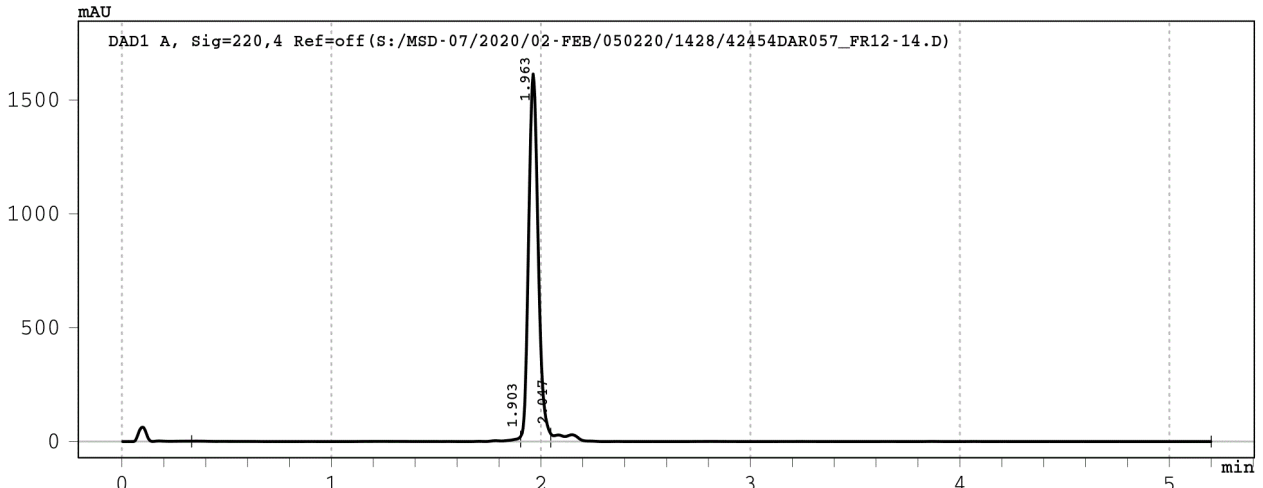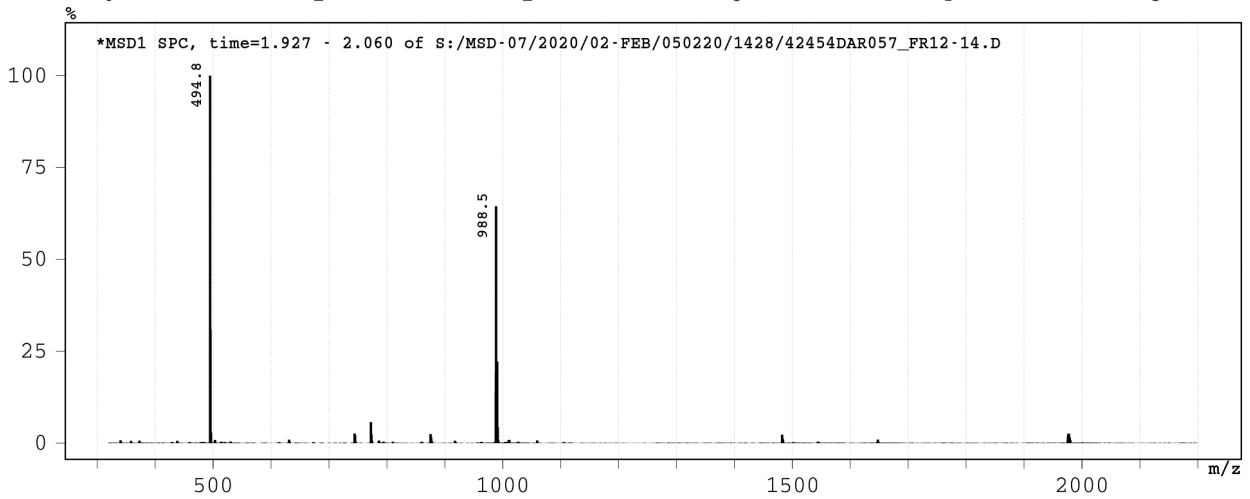

Signal 1: DAD1 A, Sig=220,4 Ref=off

| Peak # | RT [min] | Width [min] | Area   | Area % |
|--------|----------|-------------|--------|--------|
| 1      | 1.903    | 1.57        | 81.5   | 1.5    |
| 2      | 1.963    | 0.14        | 5140.0 | 94.2   |
| 3      | 2.047    | 3.15        | 236.5  | 4.3    |



Data File : S:/MSD-07/2020/02-FEB/110220/1433/42454DAR058\_FR3->  
 Injection Date : 11-Feb-20, 23:44:51  
 Sample Name : 42454DAR058\_FR3-5  
 Remarks : Baseline corrected  
 Acq. Method : D:/METHODS/5-95-6M.M  
 column used : Je\_559  
 Analysis Method : C:/CHEM32/1/METHODS/JPT-LCMS.M



Sample Info : 42454\_058-Dr. Martine Darwish H-VIHRREV-OH

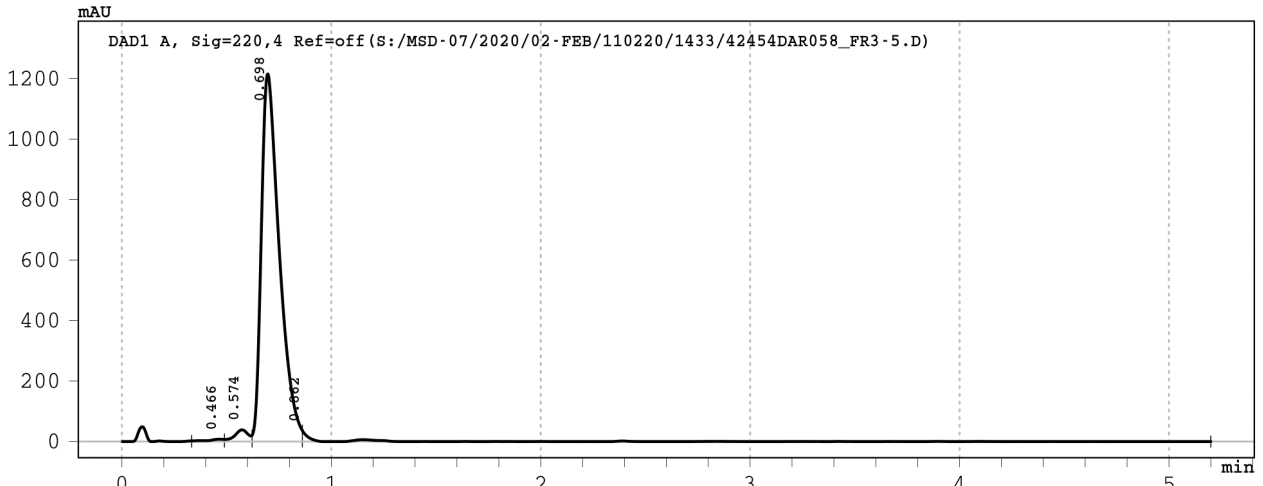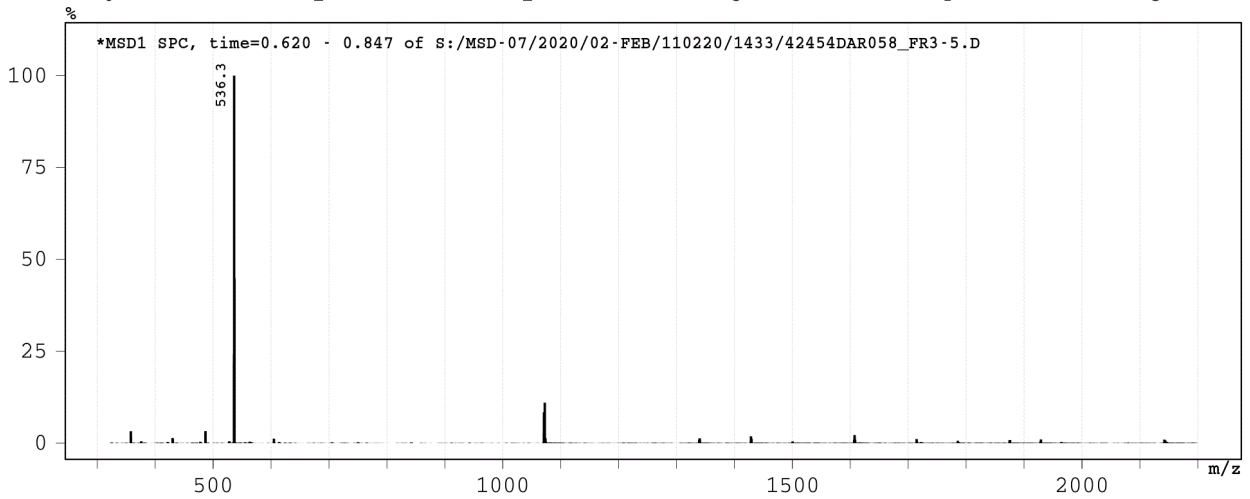

Signal 1: DAD1 A, Sig=220,4 Ref=off

| Peak # | RT [min] | Width [min] | Area   | Area % |
|--------|----------|-------------|--------|--------|
| 1      | 0.466    | 0.16        | 42.2   | 0.6    |
| 2      | 0.574    | 0.13        | 176.7  | 2.3    |
| 3      | 0.698    | 0.24        | 7262.8 | 95.4   |
| 4      | 0.862    | 4.34        | 130.0  | 1.7    |

Data File : S:/MSD-07/2020/02-FEB/050220/1428/42454DAR059\_FR3->



Injection Date : 05-Feb-20, 16:53:09  
Sample Name : 42454DAR059\_FR30-31  
Remarks : Baseline corrected  
Acq. Method : D:/METHODS/5-95-6M.M  
column used : Je\_559  
Analysis Method : C:/CHEM32/1/METHODS/JPT-LCMS.M

Sample Info : 42454\_059-Dr. Martine Darwish H-SSPYSLHYL-OH

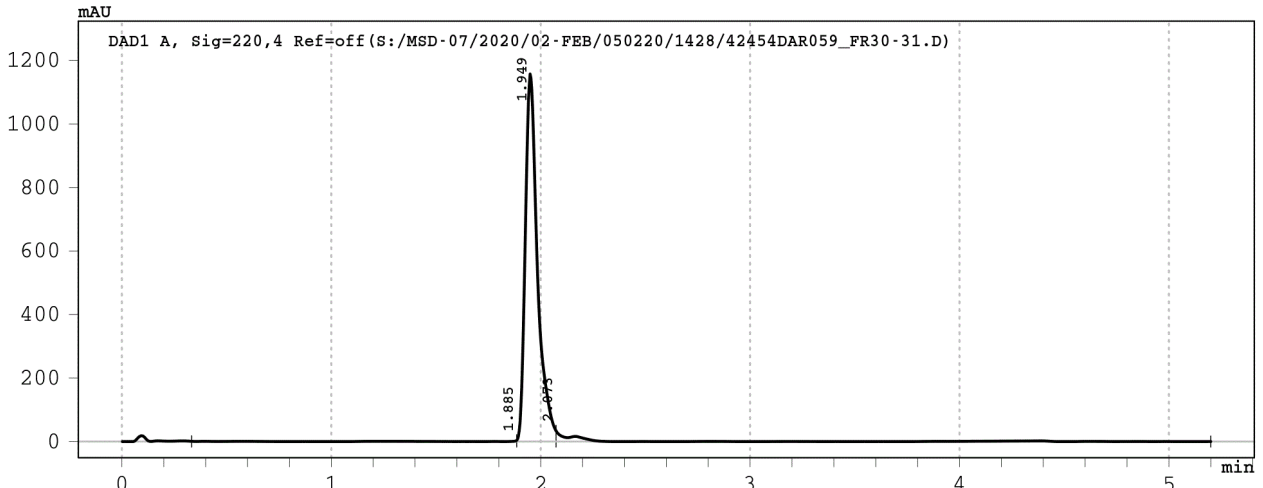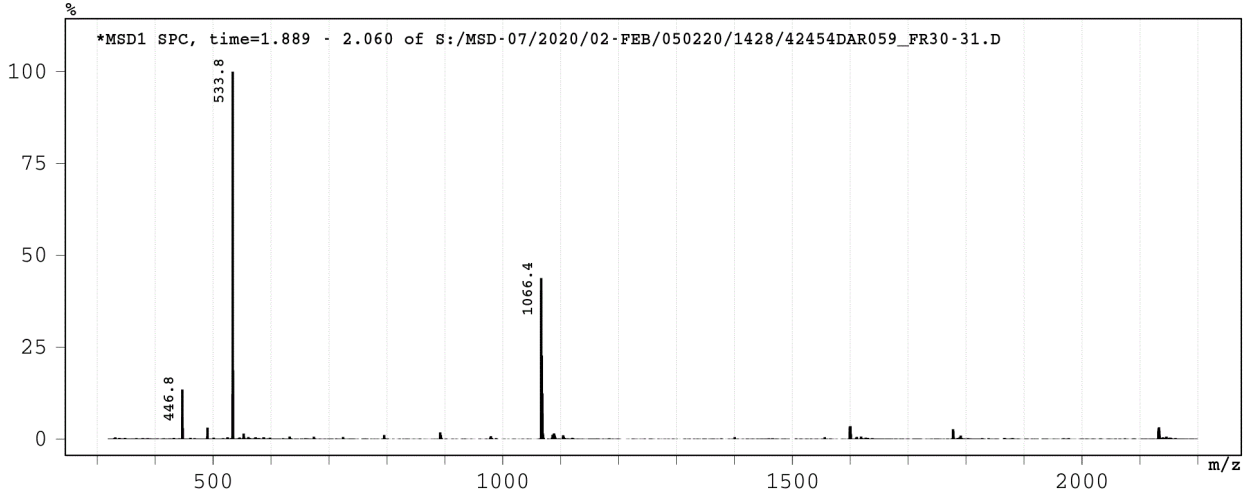

Signal 1: DAD1 A, Sig=220,4 Ref=off

| Peak # | RT [min] | Width [min] | Area   | Area % |
|--------|----------|-------------|--------|--------|
| 1      | 1.885    | 1.55        | 27.8   | 0.6    |
| 2      | 1.949    | 0.19        | 4694.9 | 95.3   |
| 3      | 2.073    | 3.13        | 203.8  | 4.1    |

Data File : S:/MSD-07/2020/02-FEB/050220/1428/42454DAR060\_FR5->



Injection Date : 05-Feb-20, 17:01:30  
Sample Name : 42454DAR060\_FR57  
Remarks : Baseline corrected  
Acq. Method : D:/METHODS/5-95-6M.M  
column used : Je\_559  
Analysis Method : C:/CHEM32/1/METHODS/JPT-LCMS.M

Sample Info : 42454\_060-Dr. Martine Darwish H-KNWINYARF-OH

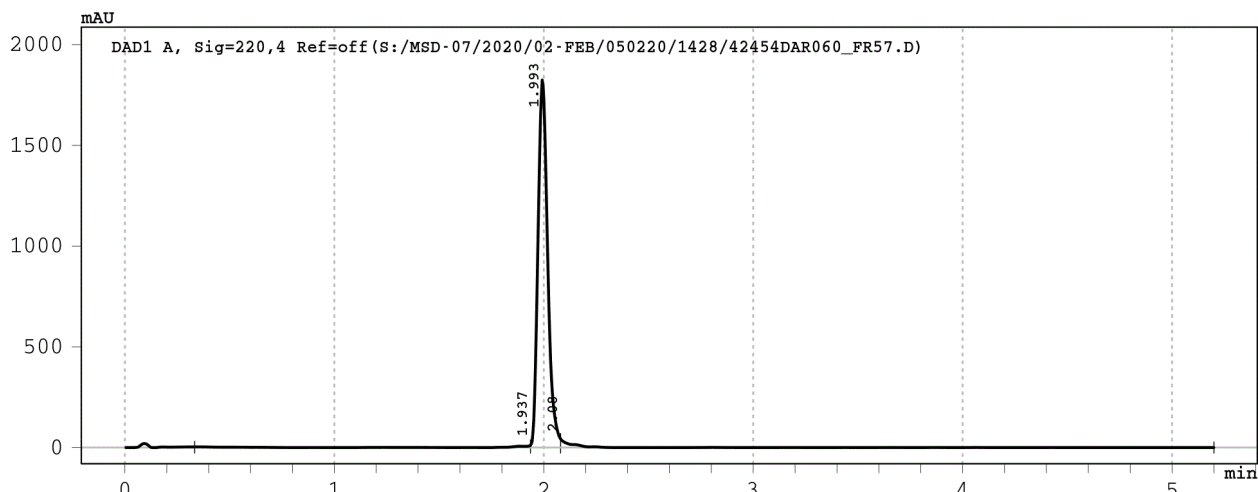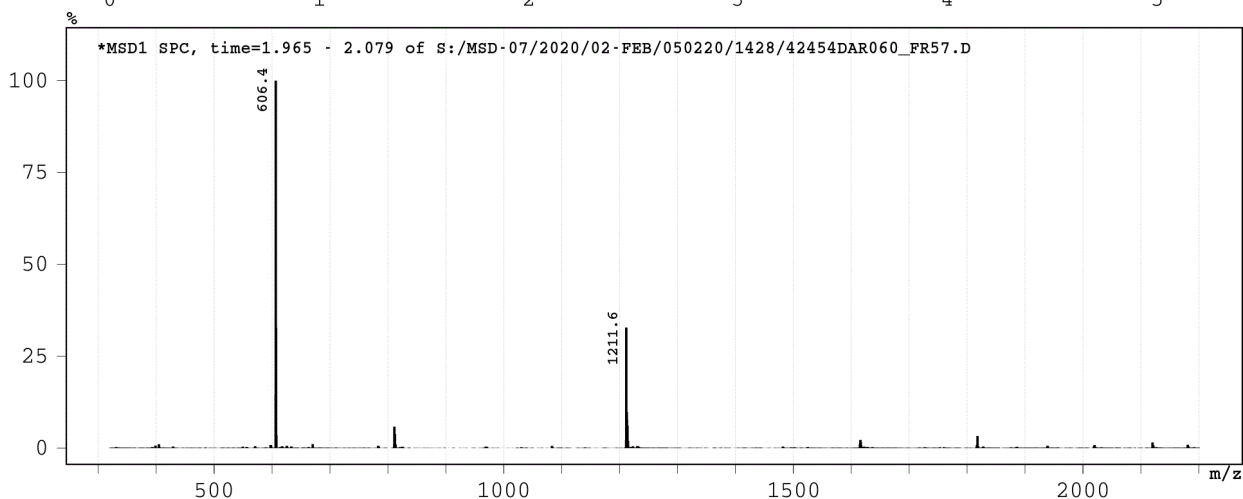

Signal 1: DAD1 A, Sig=220,4 Ref=off

| Peak # | RT [min] | Width [min] | Area   | Area % |
|--------|----------|-------------|--------|--------|
| 1      | 1.937    | 1.60        | 94.6   | 1.5    |
| 2      | 1.993    | 0.14        | 5869.0 | 96.0   |
| 3      | 2.080    | 3.12        | 147.3  | 2.4    |

Data File : S:/MSD-07/2020/02-FEB/070220/1430/42454DAR061\_FR4->  
 Injection Date : 07-Feb-20, 13:38:03  
 Sample Name : 42454DAR061\_FR46-49  
 Remarks : Baseline corrected  
 Acq. Method : D:/METHODS/5-95-6M.M  
 column used : Je\_559  
 Analysis Method : C:/CHEM32/1/METHODS/JPT-LCMS.M



Sample Info : 42454\_061-Dr. Martine Darwish H-QFFHCYCPL-OH

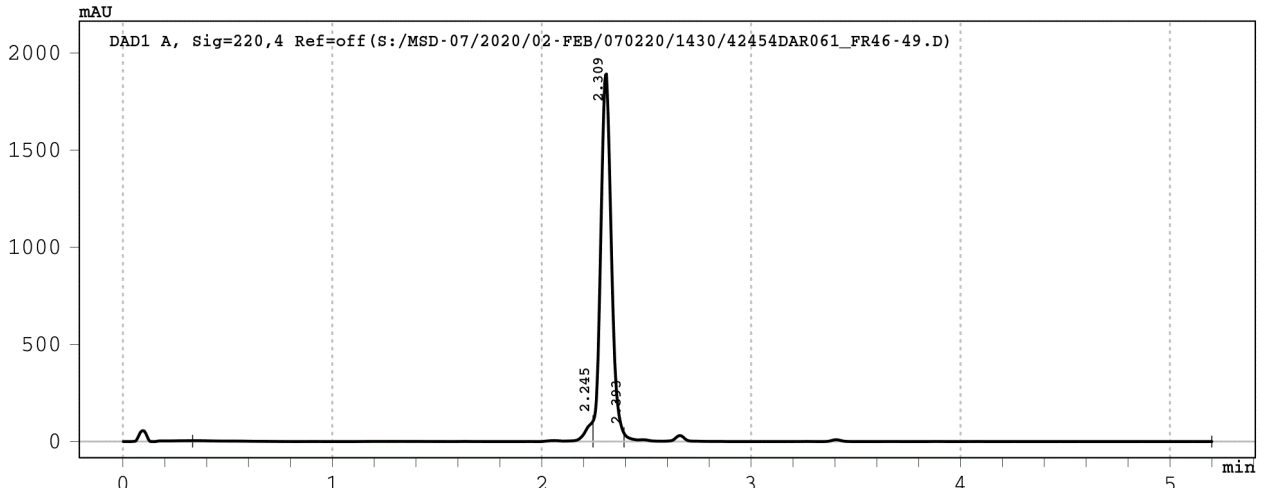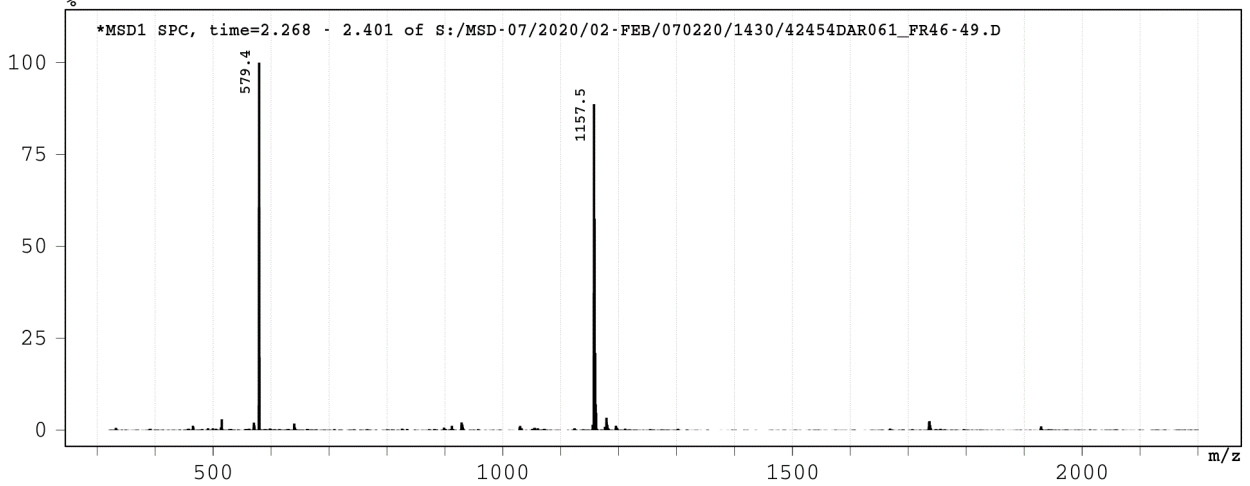

Signal 1: DAD1 A, Sig=220,4 Ref=off

| Peak # | RT [min] | Width [min] | Area   | Area % |
|--------|----------|-------------|--------|--------|
| 1      | 2.245    | 1.91        | 344.0  | 4.7    |
| 2      | 2.309    | 0.15        | 6658.7 | 91.8   |
| 3      | 2.393    | 2.81        | 249.4  | 3.4    |

Data File : S:/MSD-07/2020/02-FEB/110220/1433/42454DAR062\_FR1->



Injection Date : 11-Feb-20, 23:53:13  
Sample Name : 42454DAR062\_FR15-17  
Remarks : Baseline corrected  
Acq. Method : D:/METHODS/5-95-6M.M  
column used : Je\_559  
Analysis Method : C:/CHEM32/1/METHODS/JPT-LCMS.M

Sample Info : 42454\_062-Dr. Martine Darwish H-IVYVHRGV-OH

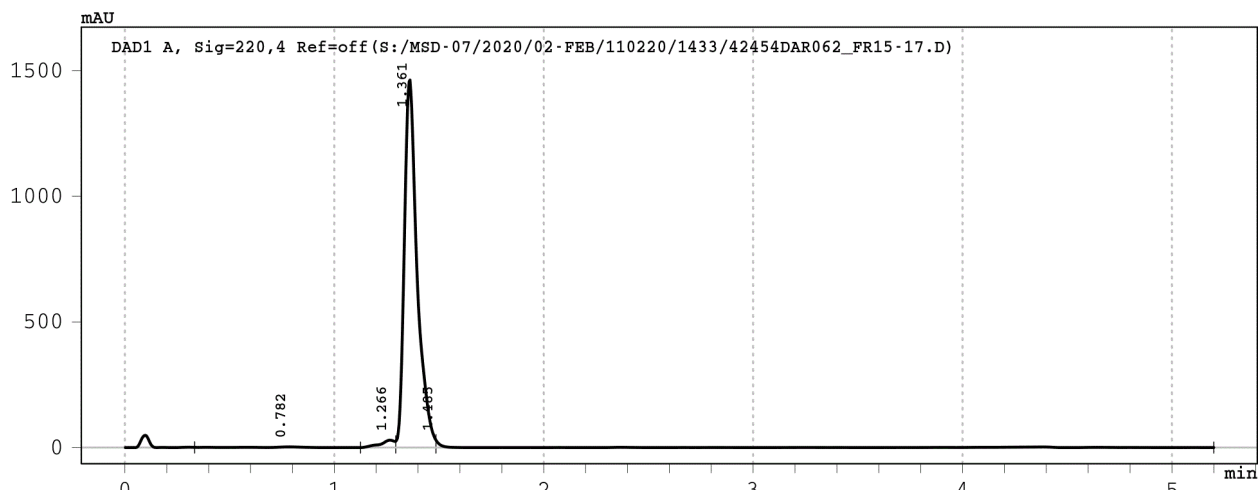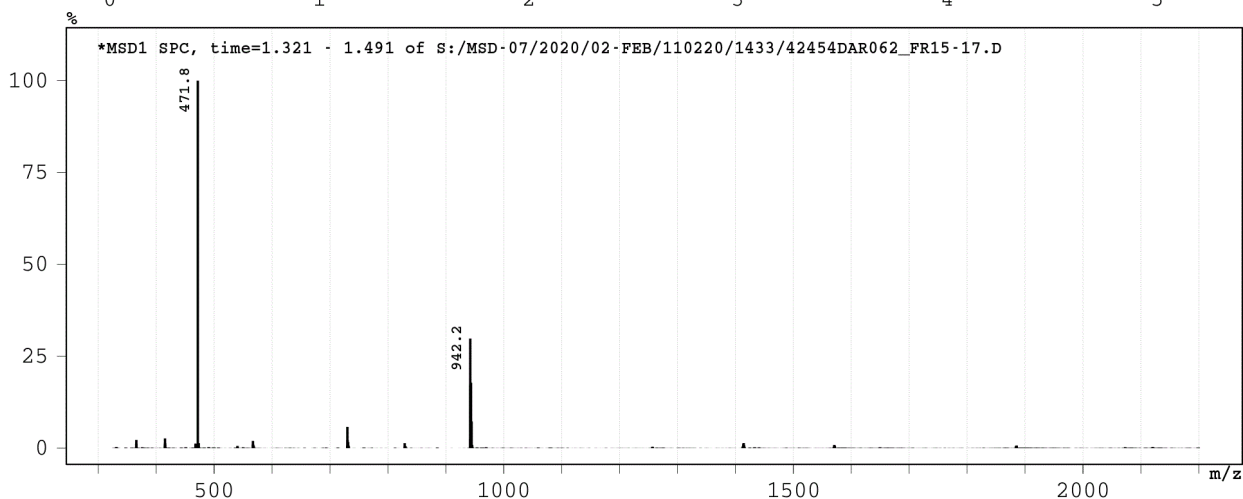

Signal 1: DAD1 A, Sig=220,4 Ref=off

| Peak # | RT [min] | Width [min] | Area   | Area % |
|--------|----------|-------------|--------|--------|
| 1      | 0.782    | 0.79        | 32.6   | 0.5    |
| 2      | 1.266    | 0.17        | 139.3  | 2.1    |
| 3      | 1.361    | 0.19        | 6220.3 | 95.9   |
| 4      | 1.485    | 3.71        | 96.8   | 1.5    |

Data File : S:/MSD-07/2020/02-FEB/050220/1428/42454DAR063\_FR7->



Injection Date : 05-Feb-20, 17:09:51  
Sample Name : 42454DAR063\_FR77  
Remarks : Baseline corrected  
Acq. Method : D:/METHODS/5-95-6M.M  
column used : Je\_559  
Analysis Method : C:/CHEM32/1/METHODS/JPT-LCMS.M

Sample Info : 42454\_063-Dr. Martine Darwish H-WMNKHLNLL-OH

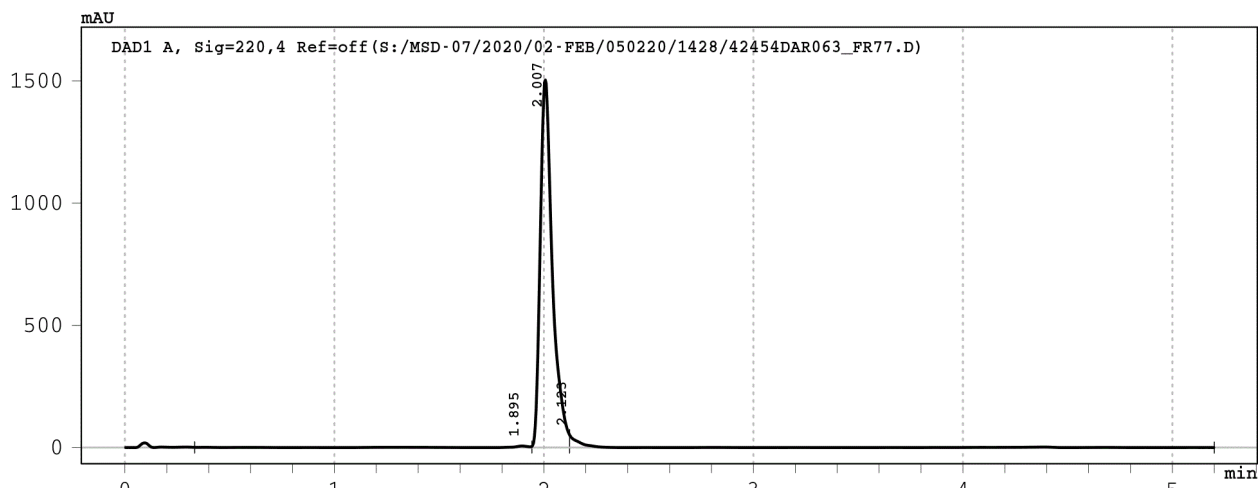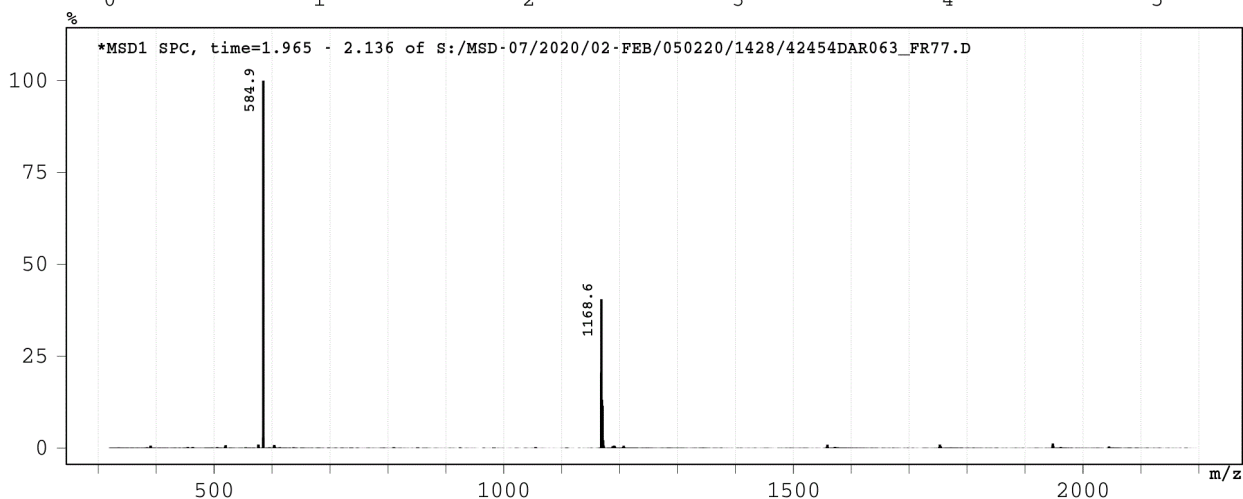

Signal 1: DAD1 A, Sig=220,4 Ref=off

| Peak # | RT [min] | Width [min] | Area   | Area % |
|--------|----------|-------------|--------|--------|
| 1      | 1.895    | 1.61        | 57.5   | 0.9    |
| 2      | 2.007    | 0.18        | 6095.9 | 96.1   |
| 3      | 2.123    | 3.08        | 187.6  | 3.0    |

Data File : S:/MSD-07/2020/02-FEB/050220/1428/42454DAR064\_FR6->  
 Injection Date : 05-Feb-20, 17:26:34  
 Sample Name : 42454DAR064\_FR6-7  
 Remarks : Baseline corrected  
 Acq. Method : D:/METHODS/5-95-6M.M  
 column used : Je\_559  
 Analysis Method : C:/CHEM32/1/METHODS/JPT-LCMS.M



Sample Info : 42454\_064-Dr. Martine Darwish H-SAAERYKWM-OH

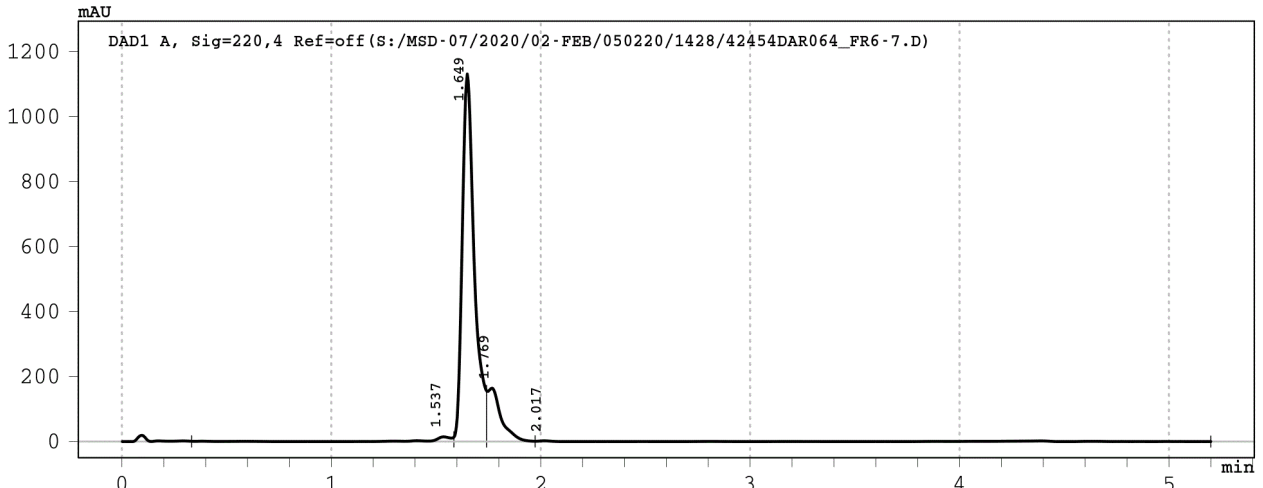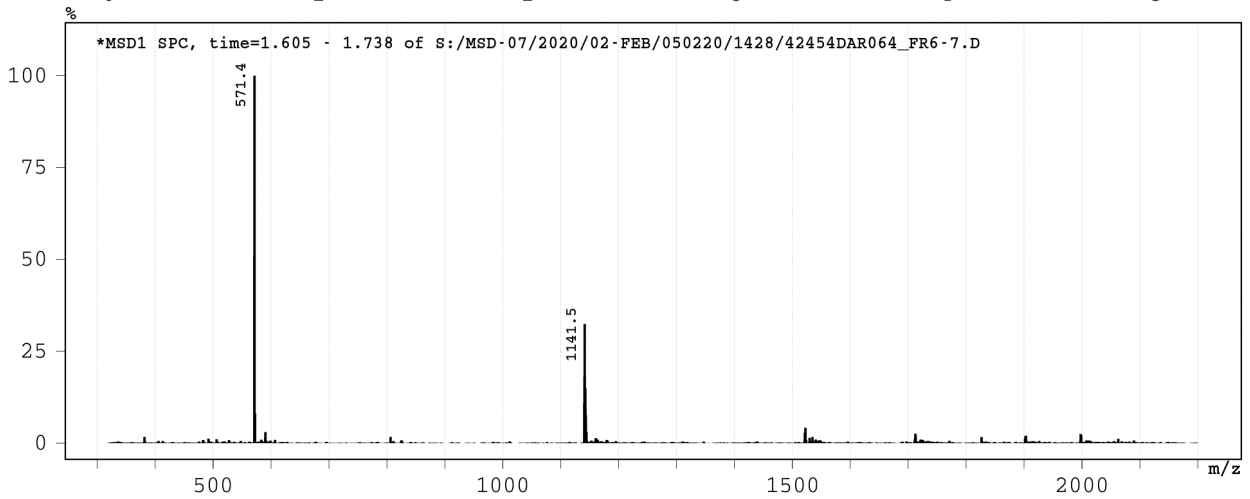

Signal 1: DAD1 A, Sig=220,4 Ref=off

| Peak # | RT [min] | Width [min] | Area   | Area % |
|--------|----------|-------------|--------|--------|
| 1      | 1.537    | 1.25        | 97.6   | 1.8    |
| 2      | 1.649    | 0.16        | 4566.8 | 83.3   |
| 3      | 1.769    | 0.23        | 764.7  | 14.0   |
| 4      | 2.017    | 3.23        | 52.5   | 1.0    |

Data File : S:/MSD-07/2020/02-FEB/050220/1428/42454DAR065\_FR3 ->



Injection Date : 05-Feb-20, 17:34:59  
Sample Name : 42454DAR065\_FR30-31  
Remarks : Baseline corrected  
Acq. Method : D:/METHODS/5-95-6M.M  
column used : Je\_559  
Analysis Method : C:/CHEM32/1/METHODS/JPT-LCMS.M

Sample Info : 42454\_065-Dr. Martine Darwish H-PNAVYFPLV-OH

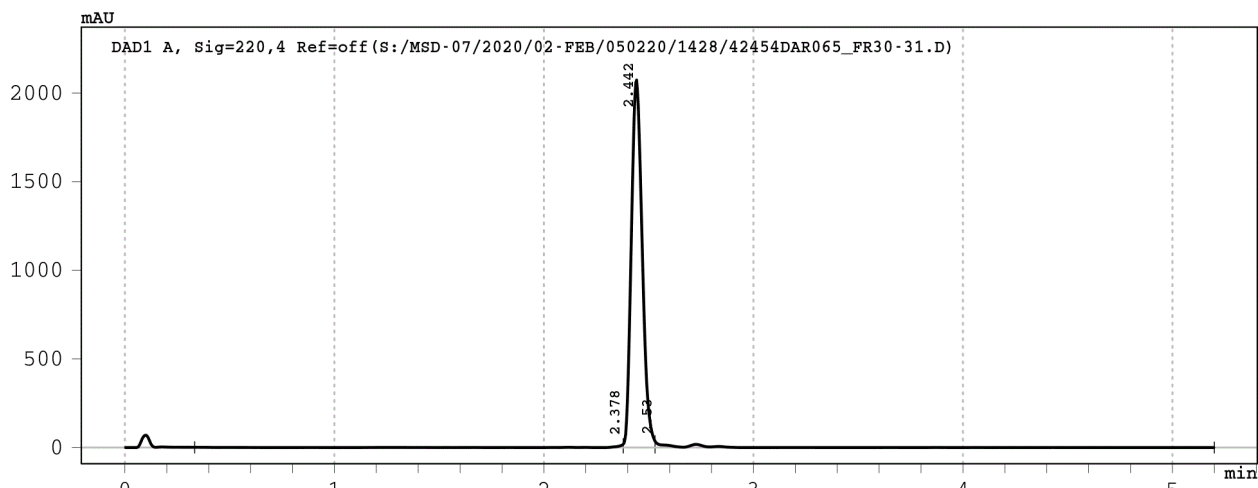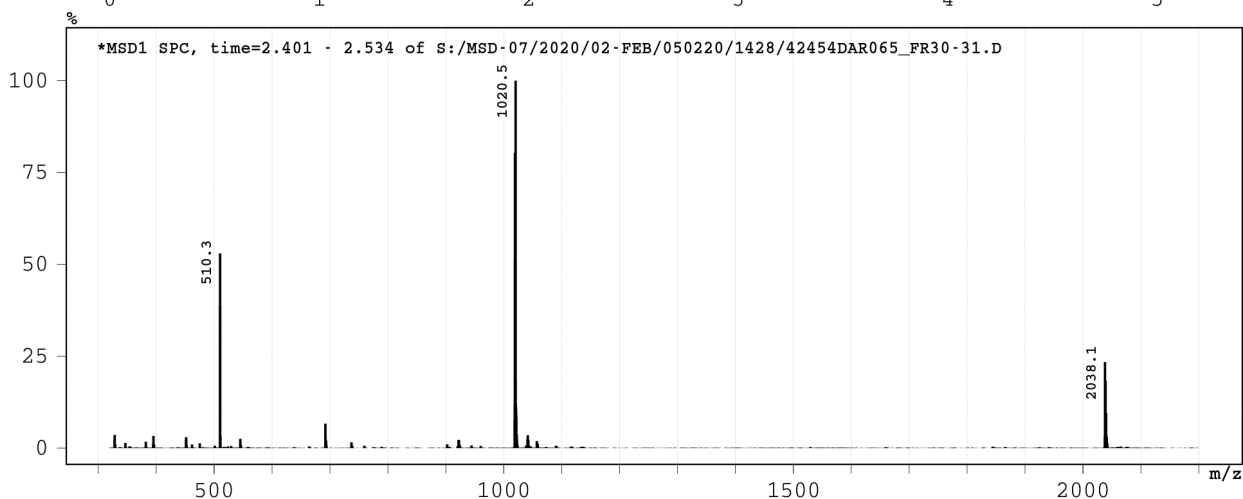

Signal 1: DAD1 A, Sig=220,4 Ref=off

| Peak # | RT [min] | Width [min] | Area   | Area % |
|--------|----------|-------------|--------|--------|
| 1      | 2.378    | 2.05        | 60.6   | 0.8    |
| 2      | 2.442    | 0.15        | 7488.2 | 96.7   |
| 3      | 2.530    | 2.67        | 197.2  | 2.5    |



Data File : S:/MSD-07/2020/02-FEB/110220/1433/42454DAR066\_FR2->



Injection Date : 12-Feb-20, 00:01:36  
Sample Name : 42454DAR066\_FR24-28  
Remarks : Baseline corrected  
Acq. Method : D:/METHODS/5-95-6M.M  
column used : Je\_559  
Analysis Method : C:/CHEM32/1/METHODS/JPT-LCMS.M

Sample Info : 42454\_066-Dr. Martine Darwish H-TKILYPRV-OH

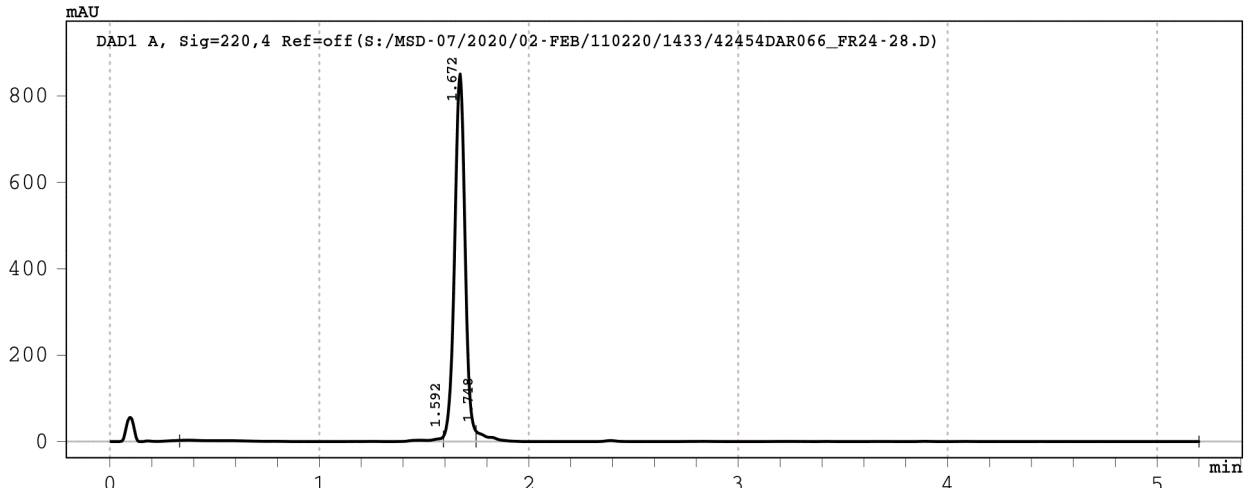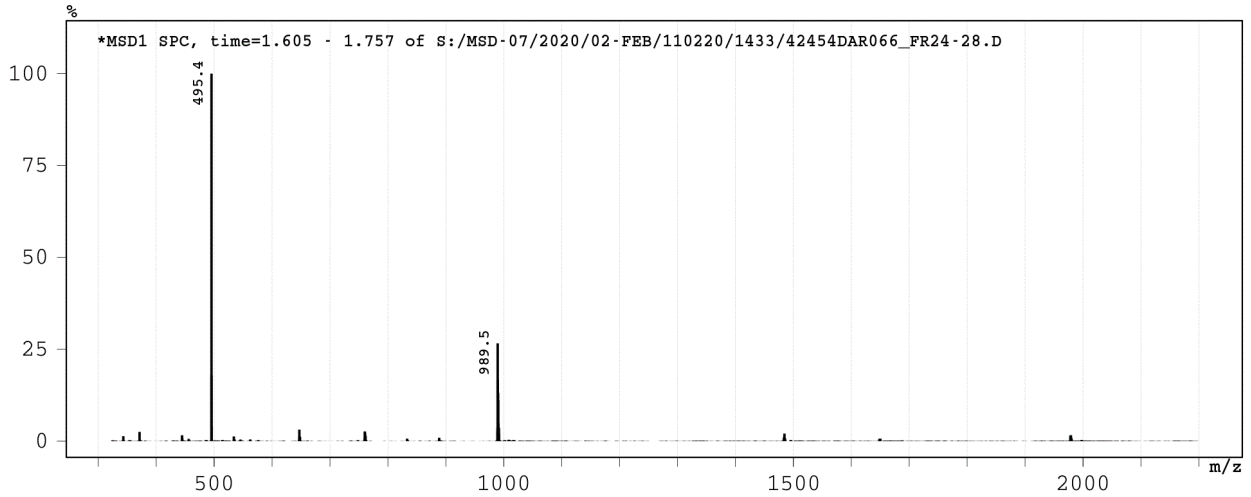

Signal 1: DAD1 A, Sig=220,4 Ref=off

| Peak # | RT [min] | Width [min] | Area   | Area % |
|--------|----------|-------------|--------|--------|
| 1      | 1.592    | 1.26        | 91.4   | 2.9    |
| 2      | 1.672    | 0.16        | 2954.1 | 93.7   |
| 3      | 1.748    | 3.45        | 107.6  | 3.4    |

Data File : S:/MSD-07/2020/02-FEB/050220/1428/42454DAR067\_FR4->  
 Injection Date : 05-Feb-20, 17:43:23  
 Sample Name : 42454DAR067\_FR44-46  
 Remarks : Baseline corrected  
 Acq. Method : D:/METHODS/5-95-6M.M  
 column used : Je\_559  
 Analysis Method : C:/CHEM32/1/METHODS/JPT-LCMS.M



Sample Info : 42454\_067-Dr. Martine Darwish H-ALYVCGSL-OH

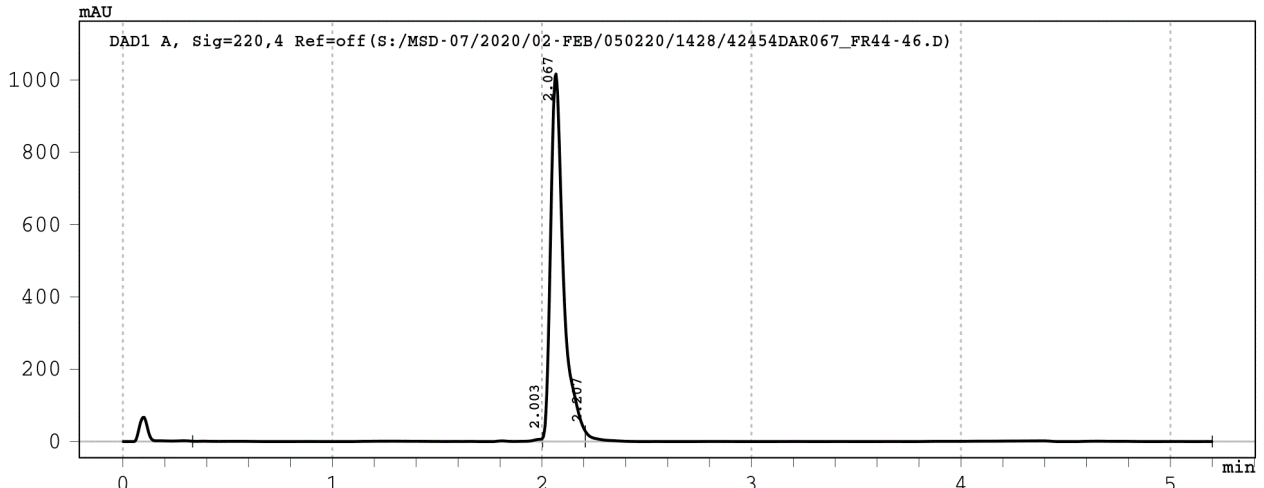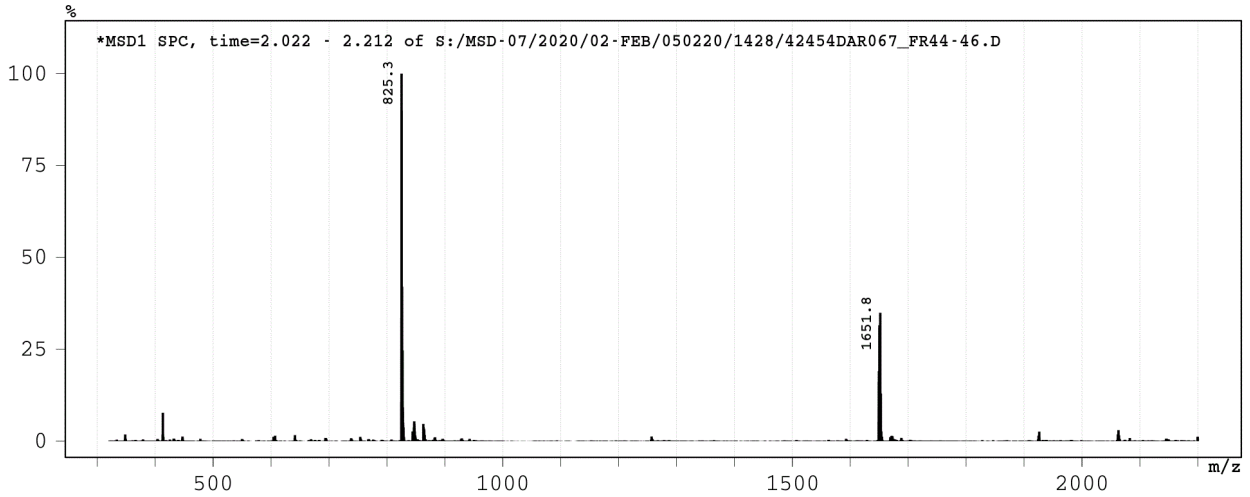

Signal 1: DAD1 A, Sig=220,4 Ref=off

| Peak # | RT [min] | Width [min] | Area   | Area % |
|--------|----------|-------------|--------|--------|
| 1      | 2.003    | 1.67        | 57.1   | 1.3    |
| 2      | 2.067    | 0.20        | 4349.5 | 95.9   |
| 3      | 2.207    | 2.99        | 128.9  | 2.8    |

Data File : S:/MSD-07/2020/02-FEB/050220/1428/42454DAR068\_FR5->



Injection Date : 05-Feb-20, 17:51:47  
Sample Name : 42454DAR068\_FR53-54  
Remarks : Baseline corrected  
Acq. Method : D:/METHODS/5-95-6M.M  
column used : Je\_559  
Analysis Method : C:/CHEM32/1/METHODS/JPT-LCMS.M

Sample Info : 42454\_068-Dr. Martine Darwish H-KALLNGDGAI-OH

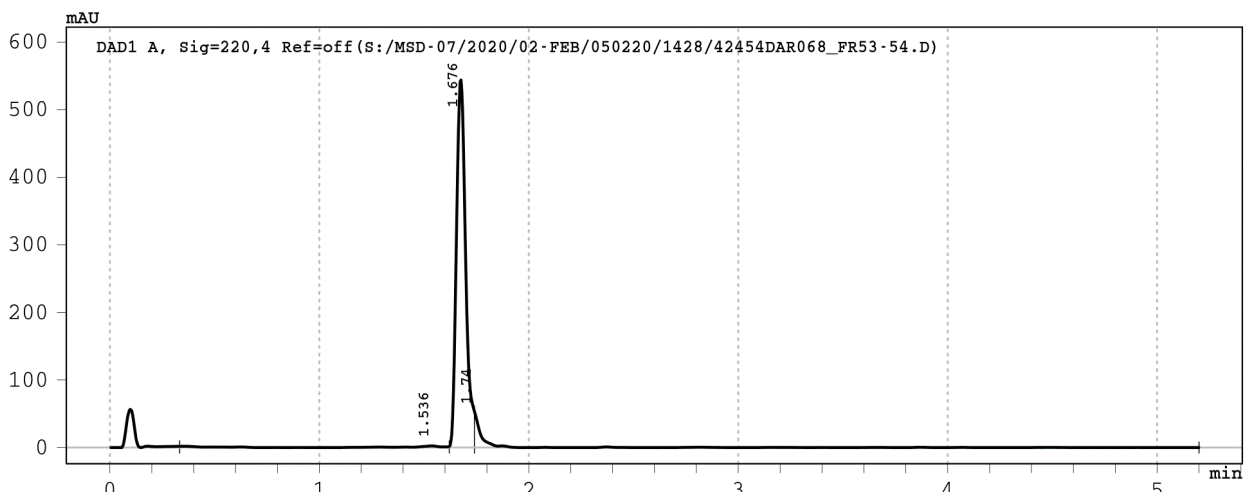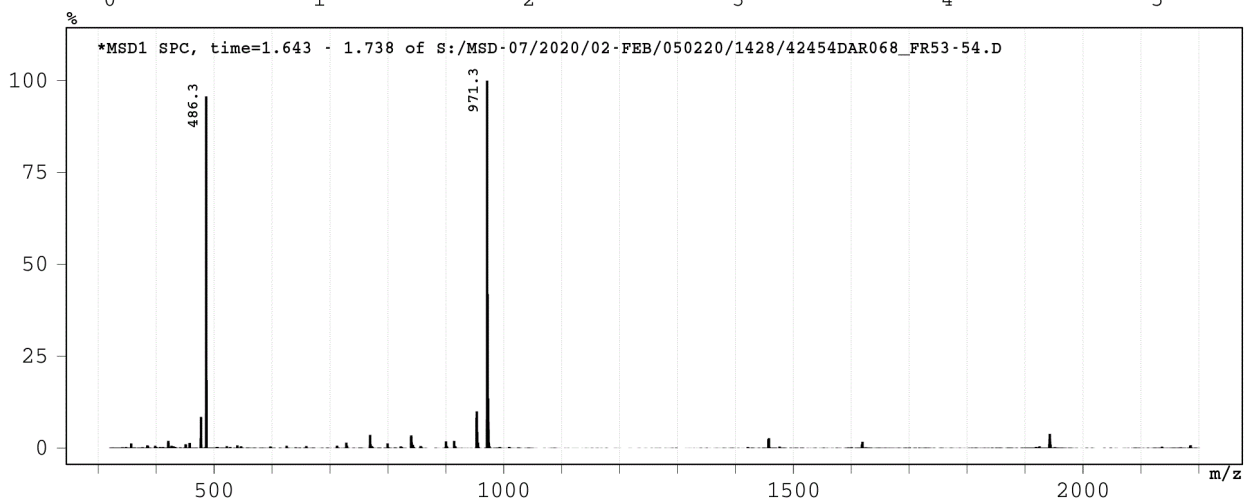

Signal 1: DAD1 A, Sig=220,4 Ref=off

| Peak # | RT [min] | Width [min] | Area   | Area % |
|--------|----------|-------------|--------|--------|
| 1      | 1.536    | 1.29        | 43.5   | 2.4    |
| 2      | 1.676    | 0.12        | 1667.5 | 90.9   |
| 3      | 1.740    | 3.46        | 122.6  | 6.7    |

Data File : S:/MSD-07/2020/02-FEB/050220/1428/42454DAR070\_FR6 ->



Injection Date : 05-Feb-20, 18:00:09  
Sample Name : 42454DAR070\_FR64  
Remarks : Baseline corrected  
Acq. Method : D:/METHODS/5-95-6M.M  
column used : Je\_559  
Analysis Method : C:/CHEM32/1/METHODS/JPT-LCMS.M

Sample Info : 42454\_070-Dr. Martine Darwish H-NNEDYYSLL-OH

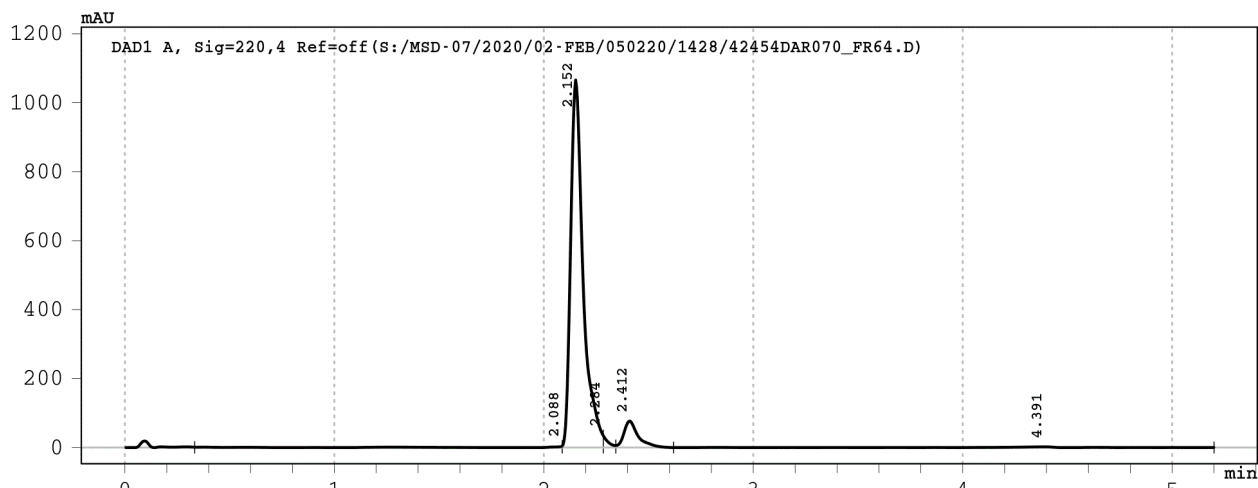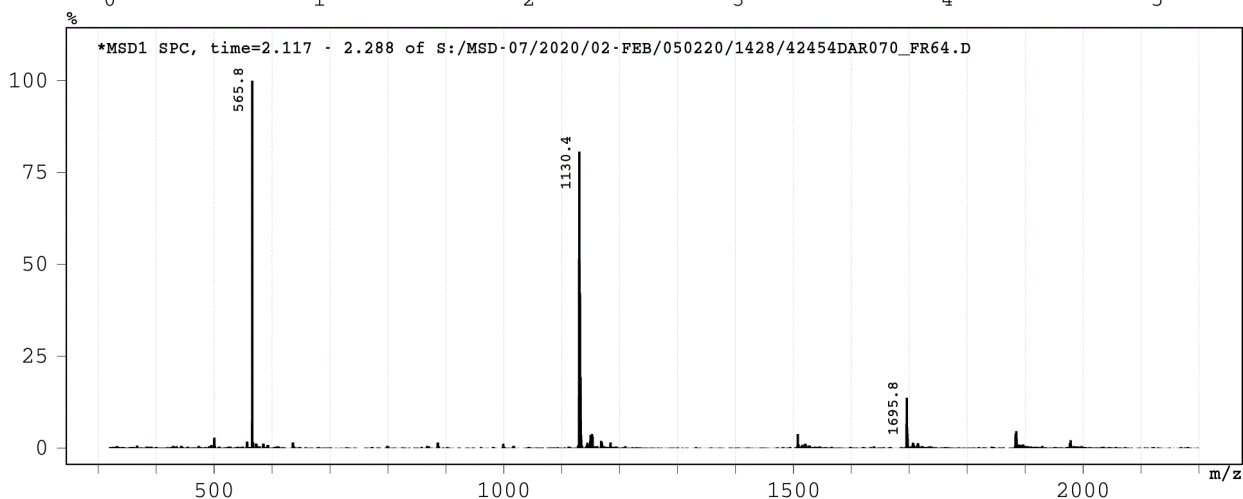

Signal 1: DAD1 A, Sig=220,4 Ref=off

| Peak # | RT [min] | Width [min] | Area   | Area % |
|--------|----------|-------------|--------|--------|
| 1      | 2.088    | 1.75        | 44.6   | 0.9    |
| 2      | 2.152    | 0.20        | 4420.5 | 89.9   |
| 3      | 2.284    | 0.06        | 53.8   | 1.1    |
| 4      | 2.412    | 0.28        | 366.4  | 7.4    |
| 5      | 4.391    | 2.58        | 33.8   | 0.7    |

Data File : S:/MSD-07/2020/02-FEB/050220/1428/42454DAR071\_FR7->



Injection Date : 05-Feb-20, 18:08:32  
Sample Name : 42454DAR071\_FR78  
Remarks : Baseline corrected  
Acq. Method : D:/METHODS/5-95-6M.M  
column used : Je\_559  
Analysis Method : C:/CHEM32/1/METHODS/JPT-LCMS.M

Sample Info : 42454\_071-Dr. Martine Darwish H-AAHRARYFL-OH

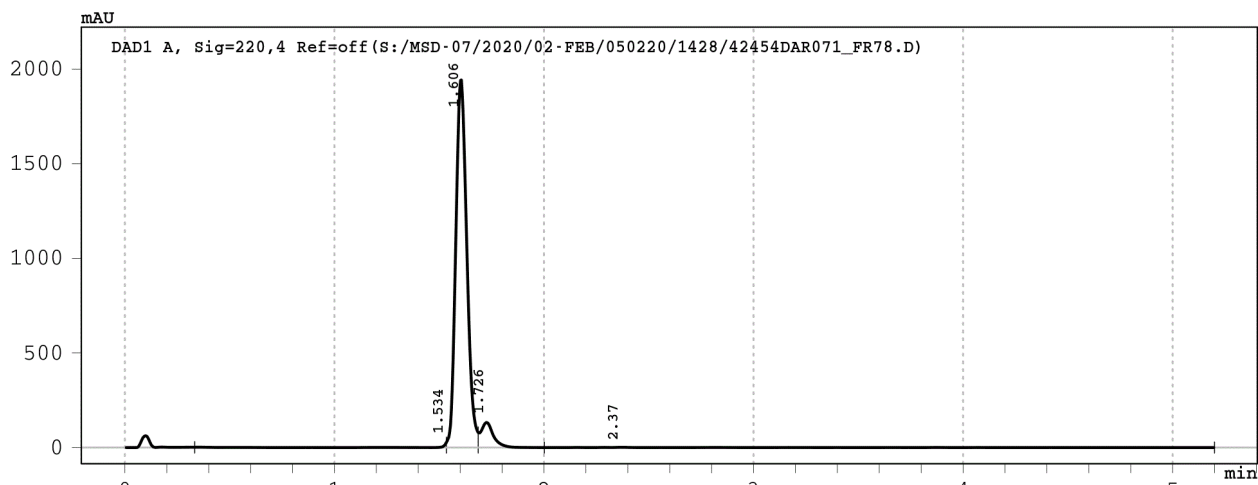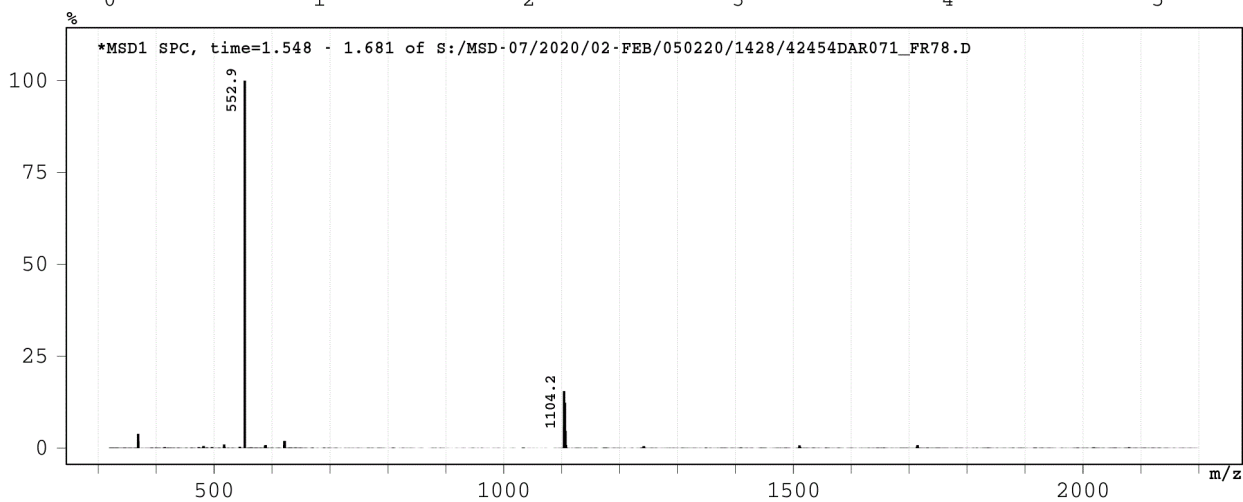

Signal 1: DAD1 A, Sig=220,4 Ref=off

| Peak # | RT [min] | Width [min] | Area   | Area % |
|--------|----------|-------------|--------|--------|
| 1      | 1.534    | 1.20        | 39.3   | 0.5    |
| 2      | 1.606    | 0.15        | 7126.9 | 92.1   |
| 3      | 1.726    | 0.32        | 557.8  | 7.2    |
| 4      | 2.370    | 3.20        | 18.4   | 0.2    |

Data File : S:/MSD-07/2020/02-FEB/050220/1428/42454DAR072\_FR4->



Injection Date : 06-Feb-20, 02:08:27  
Sample Name : 42454DAR072\_FR4-7  
Remarks : Baseline corrected  
Acq. Method : D:/METHODS/5-95-6M.M  
column used : Je\_559  
Analysis Method : C:/CHEM32/1/METHODS/JPT-LCMS.M

Sample Info : 42454\_072-Dr. Martine Darwish H-SIIVFNLL-OH

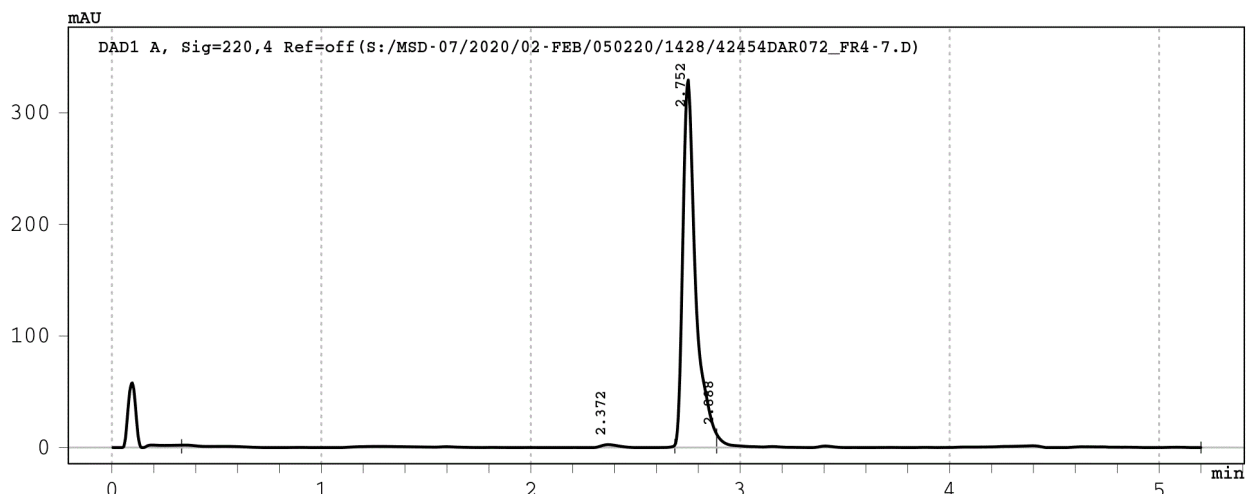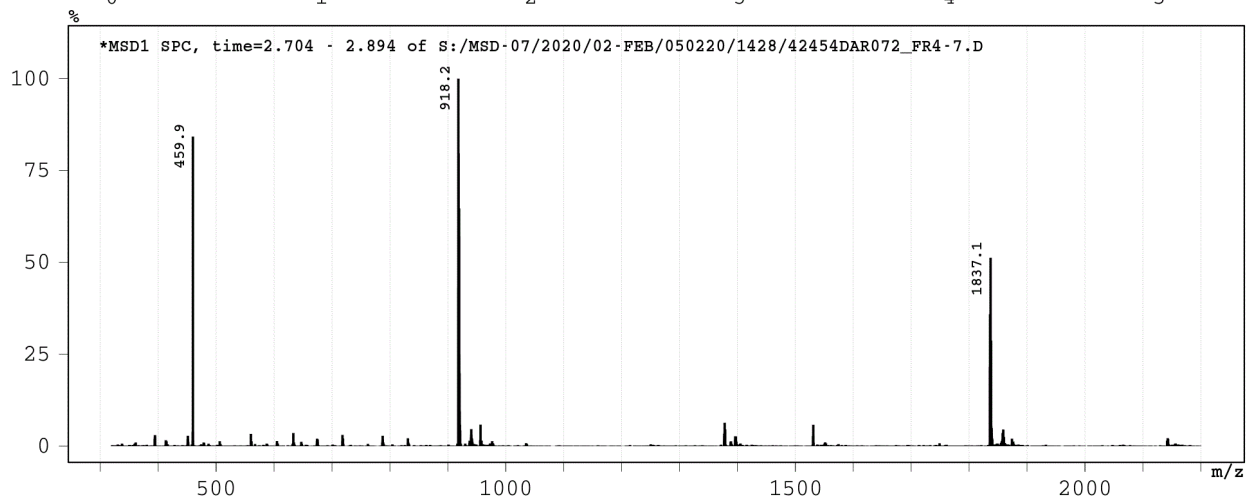

Signal 1: DAD1 A, Sig=220,4 Ref=off

| Peak # | RT [min] | Width [min] | Area   | Area % |
|--------|----------|-------------|--------|--------|
| 1      | 2.372    | 2.35        | 62.3   | 4.0    |
| 2      | 2.752    | 0.20        | 1406.3 | 91.1   |
| 3      | 2.888    | 2.31        | 74.8   | 4.8    |

Data File : S:/MSD-07/2020/02-FEB/050220/1428/42454DAR073\_FR6->  
 Injection Date : 06-Feb-20, 02:33:40  
 Sample Name : 42454DAR073\_FR60-69  
 Remarks : Baseline corrected  
 Acq. Method : D:/METHODS/5-95-6M.M  
 column used : Je\_559  
 Analysis Method : C:/CHEM32/1/METHODS/JPT-LCMS.M



Sample Info : 42454\_073-Dr. Martine Darwish H-PVYFYIAIV-OH

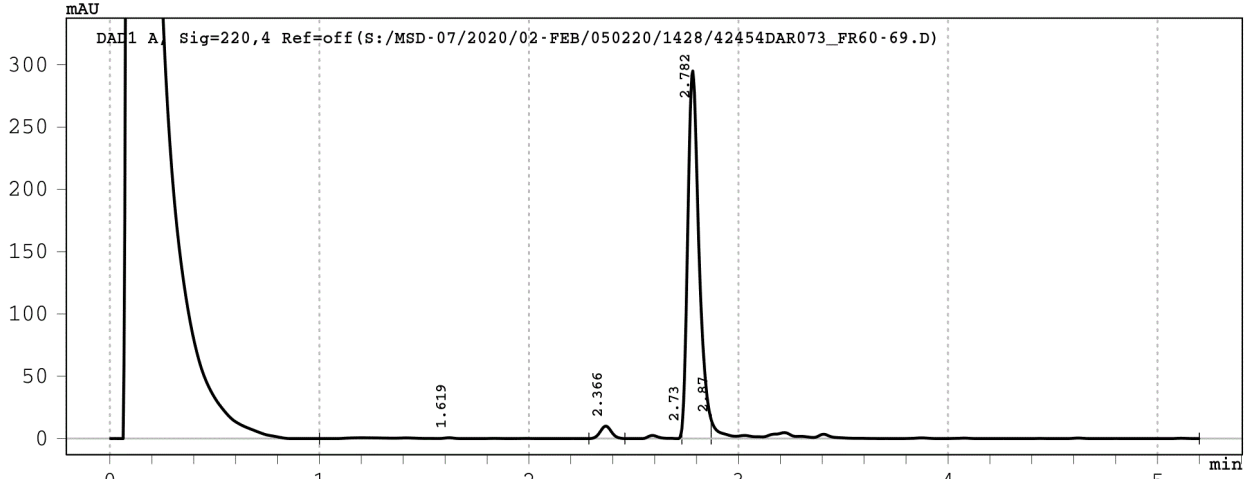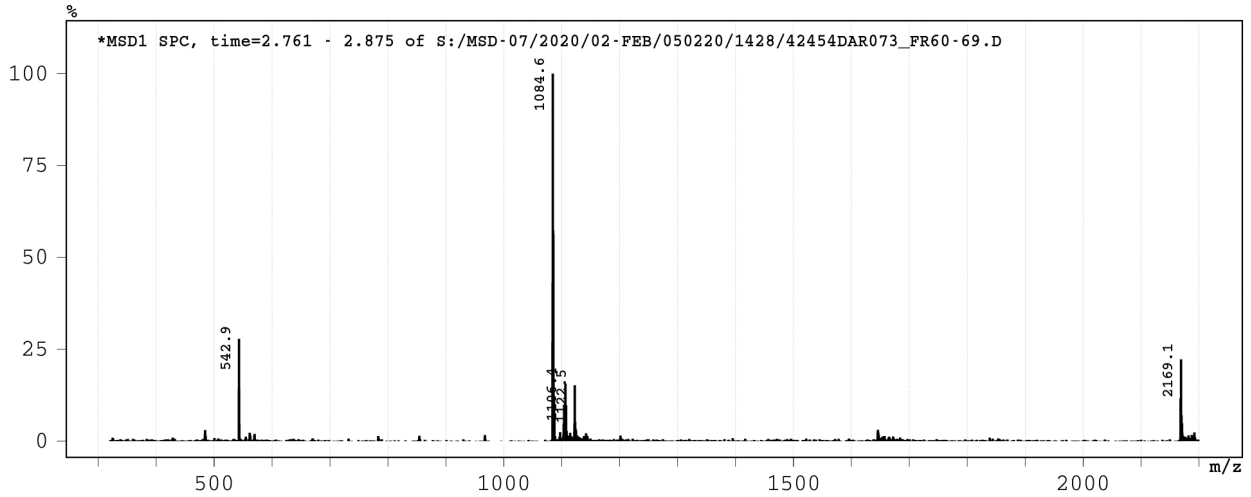

Signal 1: DAD1 A, Sig=220,4 Ref=off

| Peak # | RT [min] | Width [min] | Area   | Area % |
|--------|----------|-------------|--------|--------|
| 1      | 1.619    | 1.29        | 12.7   | 1.0    |
| 2      | 2.366    | 0.17        | 36.9   | 2.9    |
| 3      | 2.730    | 0.27        | 10.7   | 0.8    |
| 4      | 2.782    | 0.14        | 1105.1 | 86.8   |
| 5      | 2.870    | 2.33        | 108.2  | 8.5    |

Data File : S:/MSD-07/2020/02-FEB/050220/1428/42454DAR074\_FR7->



Injection Date : 06-Feb-20, 02:42:04  
Sample Name : 42454DAR074\_FR77-78  
Remarks : Baseline corrected  
Acq. Method : D:/METHODS/5-95-6M.M  
column used : Je\_559  
Analysis Method : C:/CHEM32/1/METHODS/JPT-LCMS.M

Sample Info : 42454\_074-Dr. Martine Darwish H-SSISKAML-OH

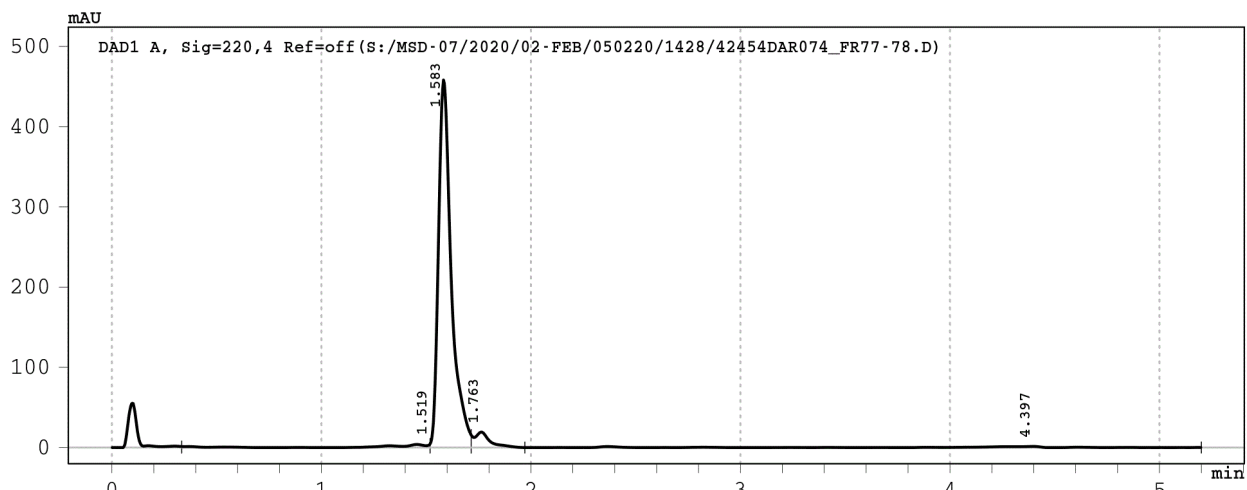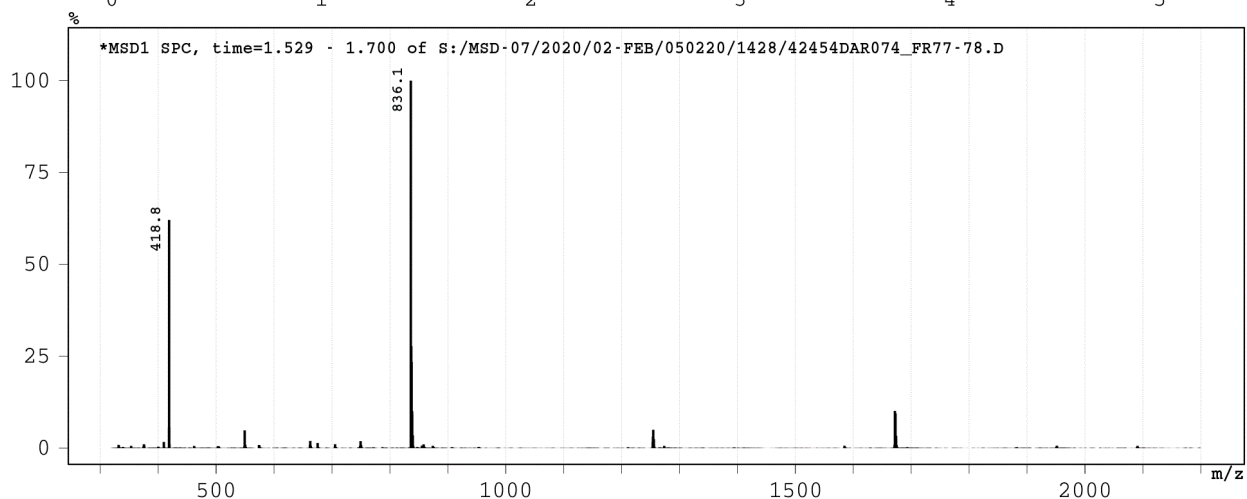

Signal 1: DAD1 A, Sig=220,4 Ref=off

| Peak # | RT [min] | Width [min] | Area   | Area % |
|--------|----------|-------------|--------|--------|
| 1      | 1.519    | 1.19        | 50.9   | 2.4    |
| 2      | 1.583    | 0.20        | 1956.9 | 91.1   |
| 3      | 1.763    | 0.26        | 102.4  | 4.8    |
| 4      | 4.397    | 3.23        | 38.4   | 1.8    |



Data File : S:/MSD-07/2020/02-FEB/050220/1428/42454DAR075\_FR8->  
 Injection Date : 06-Feb-20, 02:50:30  
 Sample Name : 42454DAR075\_FR88-90  
 Remarks : Baseline corrected  
 Acq. Method : D:/METHODS/5-95-6M.M  
 column used : Je\_559  
 Analysis Method : C:/CHEM32/1/METHODS/JPT-LCMS.M



Sample Info : 42454\_075-Dr. Martine Darwish H-SSLTSSVPV-OH

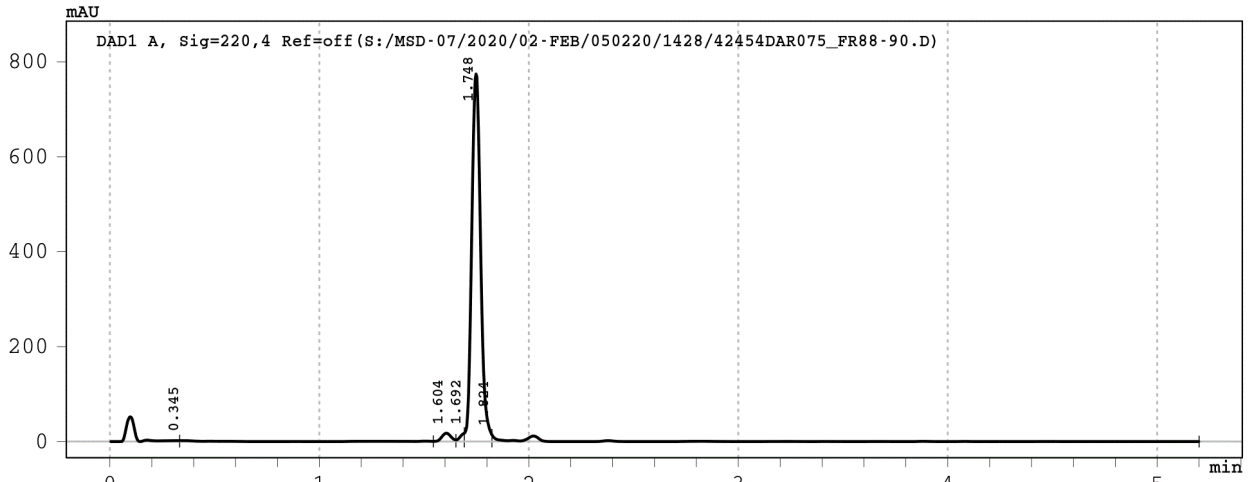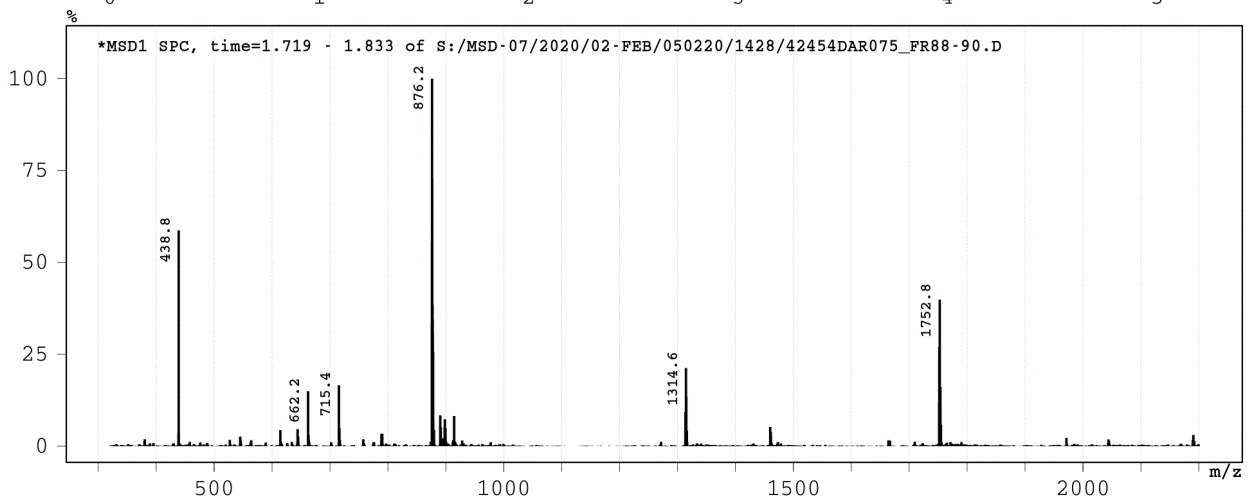

Signal 1: DAD1 A, Sig=220,4 Ref=off

| Peak # | RT [min] | Width [min] | Area   | Area % |
|--------|----------|-------------|--------|--------|
| 1      | 0.345    | 1.21        | 26.7   | 1.1    |
| 2      | 1.604    | 0.11        | 54.1   | 2.2    |
| 3      | 1.692    | 0.04        | 24.0   | 1.0    |
| 4      | 1.748    | 0.13        | 2280.9 | 92.3   |
| 5      | 1.824    | 3.38        | 85.9   | 3.5    |

Data File : S:/MSD-07/2020/02-FEB/050220/1428/42454DAR076\_FR3->  
 Injection Date : 06-Feb-20, 02:58:53  
 Sample Name : 42454DAR076\_FR3-4  
 Remarks : Baseline corrected  
 Acq. Method : D:/METHODS/5-95-6M.M  
 column used : Je\_559  
 Analysis Method : C:/CHEM32/1/METHODS/JPT-LCMS.M



Sample Info : 42454\_076-Dr. Martine Darwish H-KAYTKPELL-OH

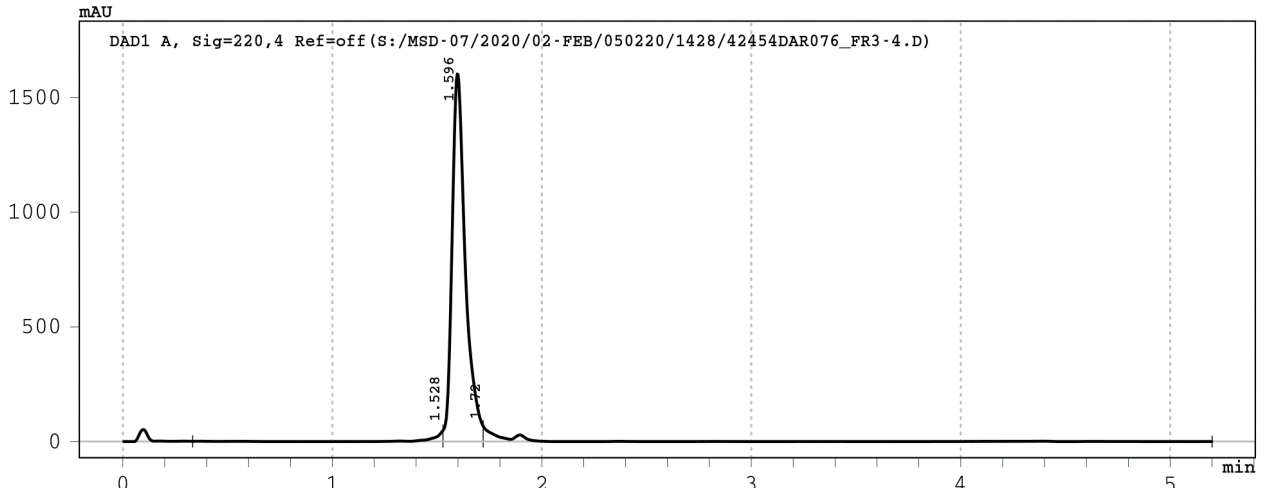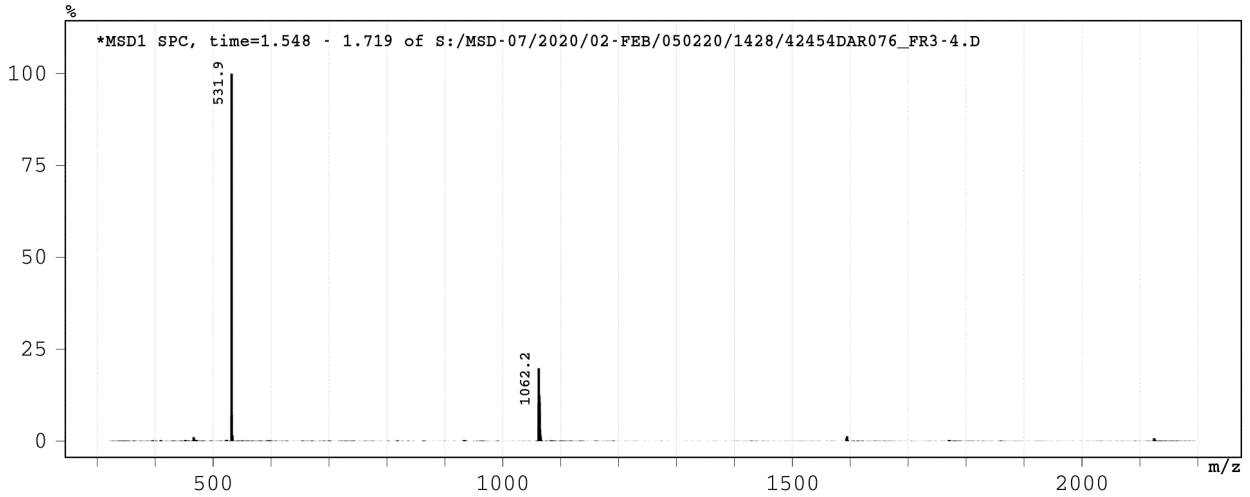

Signal 1: DAD1 A, Sig=220,4 Ref=off

| Peak # | RT [min] | Width [min] | Area   | Area % |
|--------|----------|-------------|--------|--------|
| 1      | 1.528    | 1.19        | 145.4  | 1.9    |
| 2      | 1.596    | 0.19        | 7085.9 | 93.1   |
| 3      | 1.720    | 3.48        | 380.8  | 5.0    |

Data File : S:/MSD-07/2020/02-FEB/180220/1438/42454DAR077\_FR9 ->



Injection Date : 18-Feb-20, 09:41:19  
Sample Name : 42454DAR077\_FR9  
Remarks : Baseline corrected  
Acq. Method : D:/METHODS/5-95-6M.M  
column used : Je\_559  
Analysis Method : C:/CHEM32/1/METHODS/JPT-LCMS.M

Sample Info : 42454\_077-Dr. Martine Darwish H-QIFDYNYNGL-OH

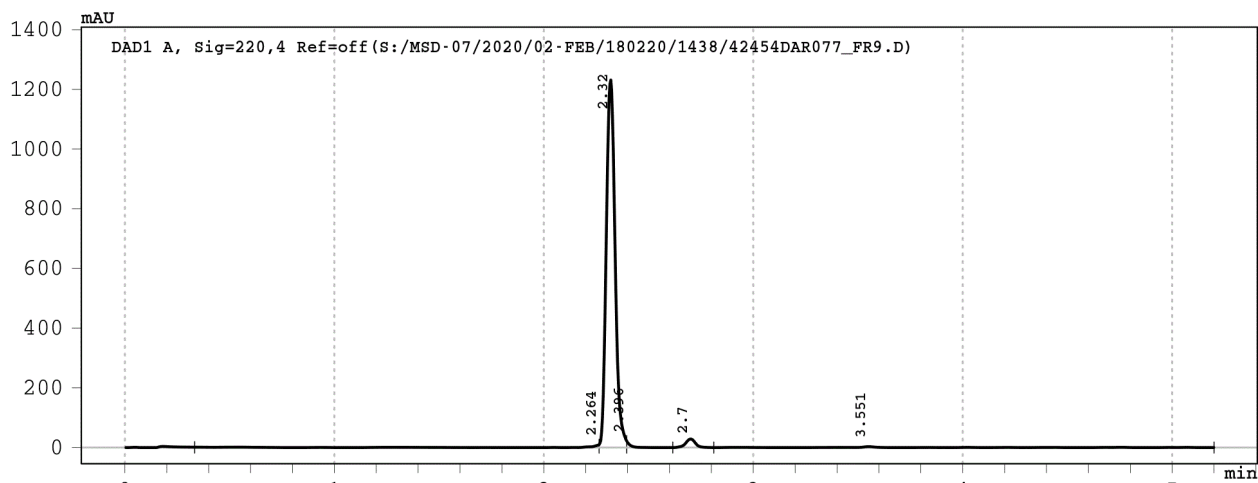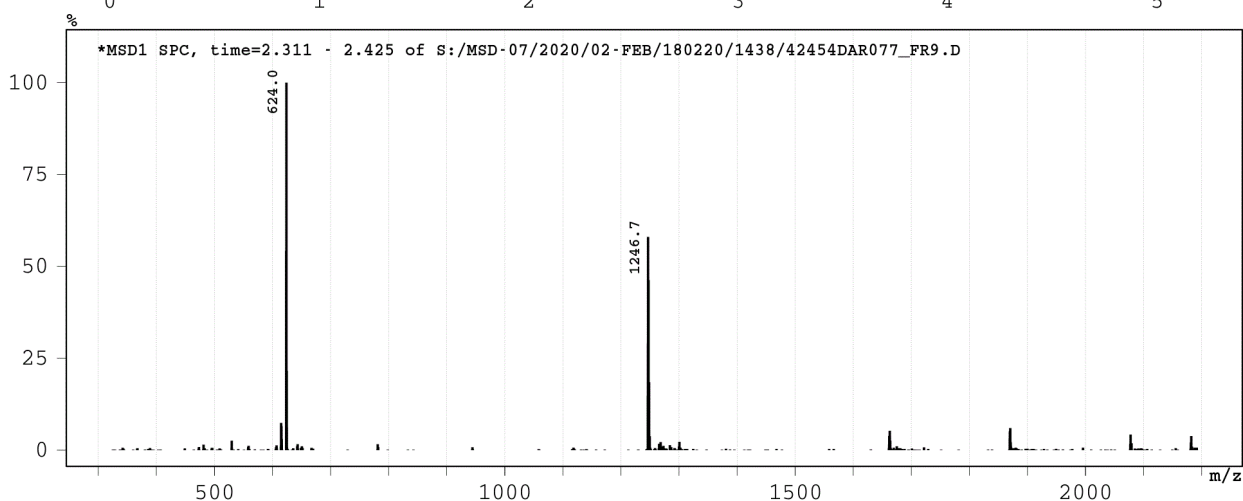

Signal 1: DAD1 A, Sig=220,4 Ref=off

| Peak # | RT [min] | Width [min] | Area   | Area % |
|--------|----------|-------------|--------|--------|
| 1      | 2.264    | 1.93        | 58.0   | 1.5    |
| 2      | 2.320    | 0.13        | 3604.2 | 94.6   |
| 3      | 2.396    | 0.22        | 21.8   | 0.6    |
| 4      | 2.700    | 0.20        | 92.0   | 2.4    |
| 5      | 3.551    | 2.39        | 35.6   | 0.9    |

Data File : S:/MSD-07/2020/02-FEB/050220/1428/42454DAR078\_FR1->  
 Injection Date : 06-Feb-20, 03:07:17  
 Sample Name : 42454DAR078\_FR16  
 Remarks : Baseline corrected  
 Acq. Method : D:/METHODS/5-95-6M.M  
 column used : Je\_559  
 Analysis Method : C:/CHEM32/1/METHODS/JPT-LCMS.M



Sample Info : 42454\_078-Dr. Martine Darwish H-SCRTFLSPL-OH

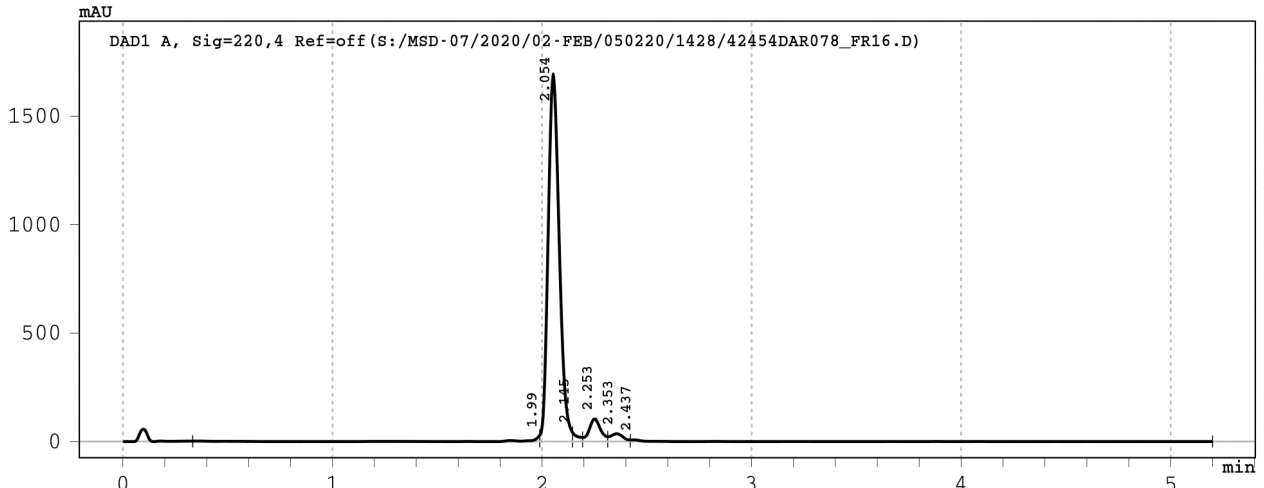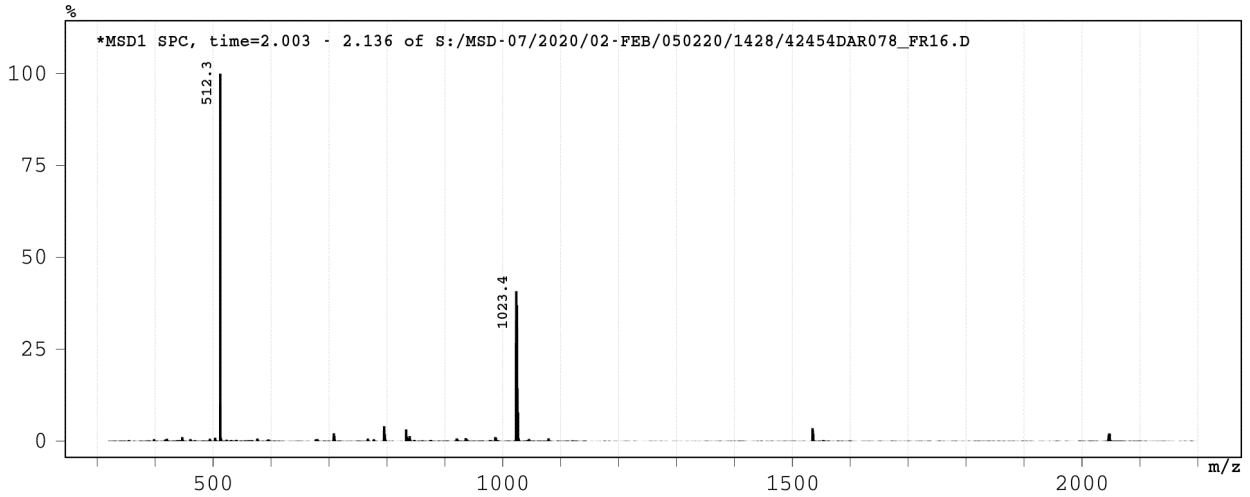

Signal 1: DAD1 A, Sig=220,4 Ref=off

| Peak # | RT [min] | Width [min] | Area   | Area % |
|--------|----------|-------------|--------|--------|
| 1      | 1.990    | 1.66        | 88.8   | 1.3    |
| 2      | 2.054    | 0.16        | 6253.6 | 89.2   |
| 3      | 2.145    | 0.05        | 72.9   | 1.0    |
| 4      | 2.253    | 0.12        | 400.1  | 5.7    |
| 5      | 2.353    | 0.11        | 153.9  | 2.2    |
| 6      | 2.437    | 2.78        | 39.0   | 0.6    |

Data File : S:/MSD-07/2020/02-FEB/050220/1428/42454DAR079\_FR4->



Injection Date : 06-Feb-20, 03:24:08  
Sample Name : 42454DAR079\_FR40-41  
Remarks : Baseline corrected  
Acq. Method : D:/METHODS/5-95-6M.M  
column used : Je\_559  
Analysis Method : C:/CHEM32/1/METHODS/JPT-LCMS.M

Sample Info : 42454\_079-Dr. Martine Darwish H-TSYCPSDL-OH

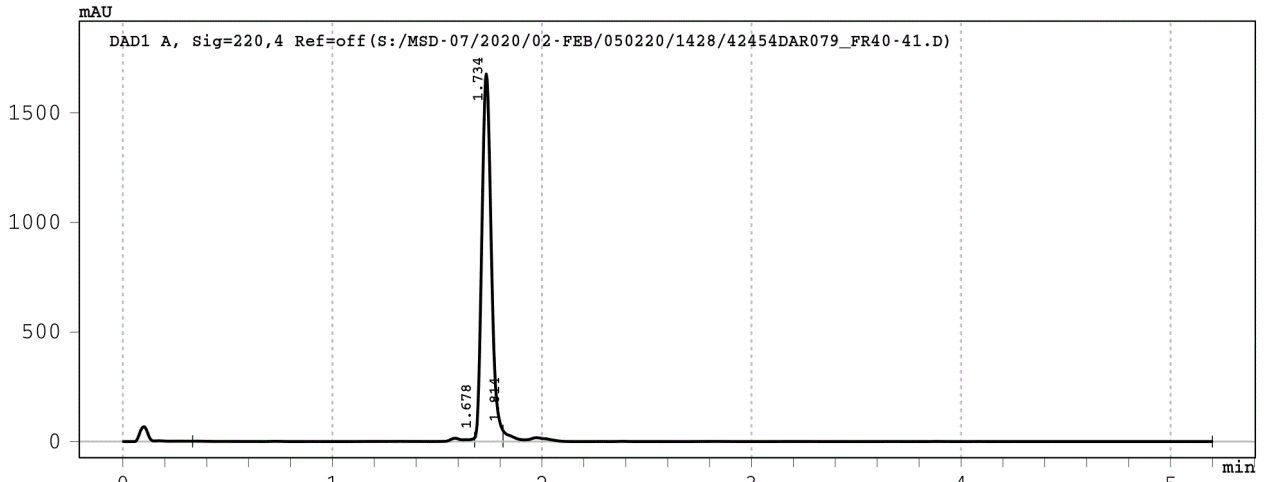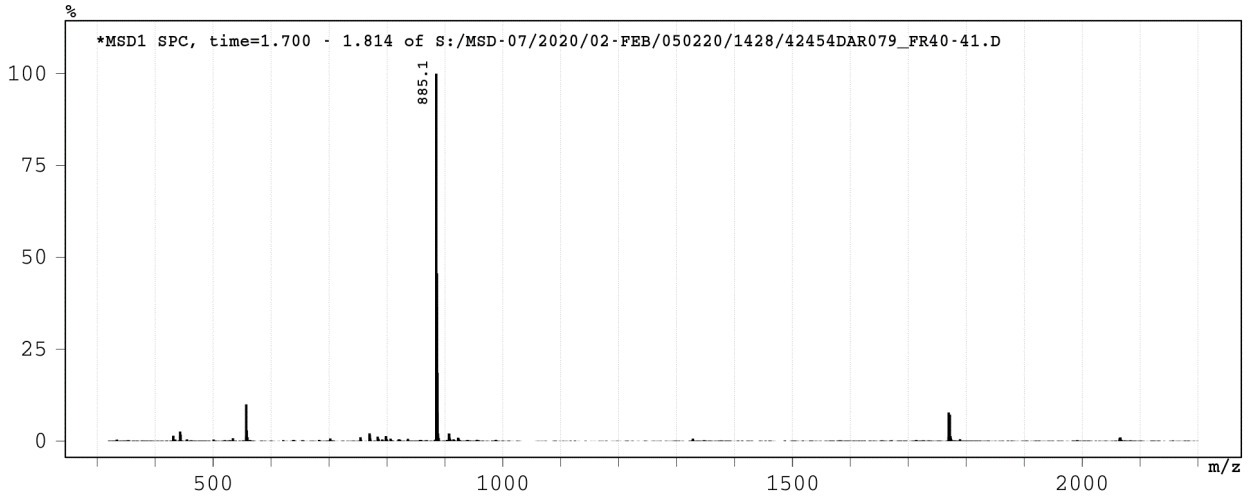

Signal 1: DAD1 A, Sig=220,4 Ref=off

| Peak # | RT [min] | Width [min] | Area   | Area % |
|--------|----------|-------------|--------|--------|
| 1      | 1.678    | 1.35        | 108.3  | 1.9    |
| 2      | 1.734    | 0.14        | 5254.0 | 93.5   |
| 3      | 1.814    | 3.39        | 254.4  | 4.5    |

Data File : S:/MSD-07/2020/02-FEB/060220/1429/42454DAR080\_FR1->



Injection Date : 06-Feb-20, 14:51:25  
Sample Name : 42454DAR080\_FR10-11  
Remarks : Baseline corrected  
Acq. Method : D:/METHODS/5-95-6M.M  
column used : Je\_559  
Analysis Method : C:/CHEM32/1/METHODS/JPT-LCMS.M

Sample Info : 42454\_080-Dr. Martine Darwish H-LQPLFYAL-OH

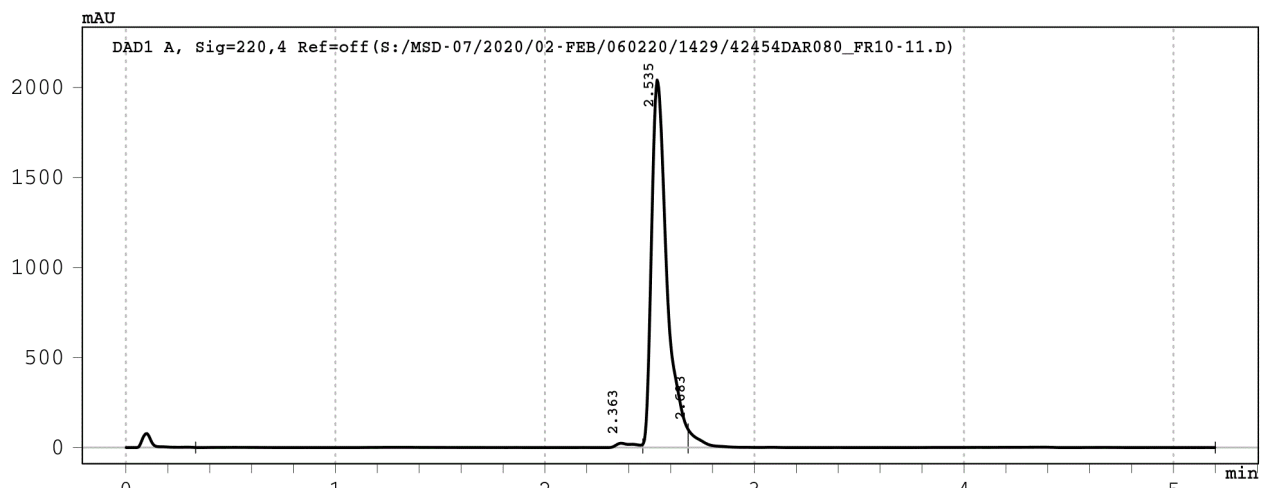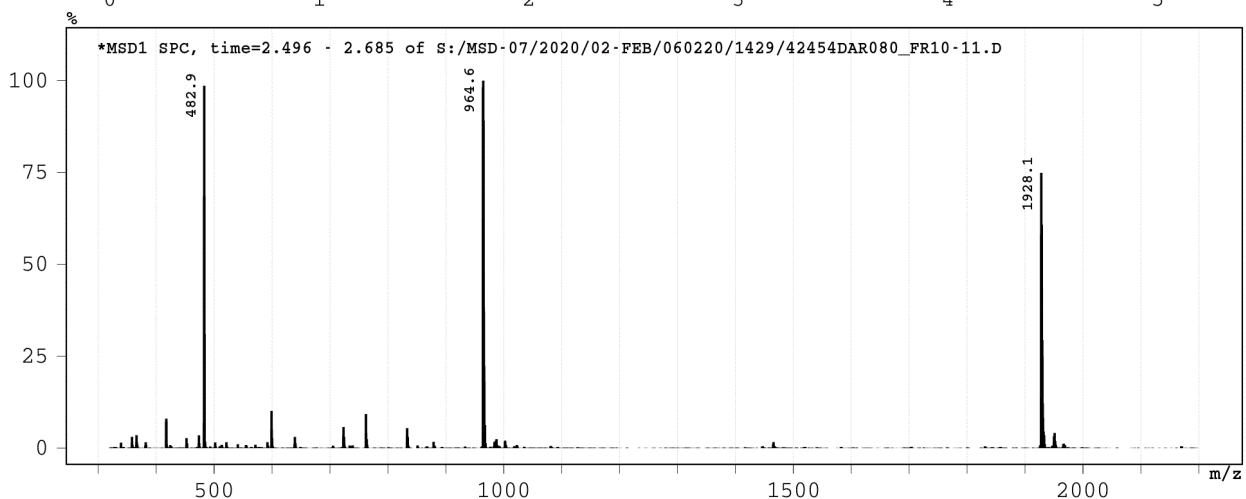

Signal 1: DAD1 A, Sig=220,4 Ref=off

| Peak # | RT [min] | Width [min] | Area    | Area % |
|--------|----------|-------------|---------|--------|
| 1      | 2.363    | 2.13        | 184.7   | 1.7    |
| 2      | 2.535    | 0.22        | 10389.0 | 94.7   |
| 3      | 2.683    | 2.52        | 400.5   | 3.6    |

Data File: S:\MSD-07\2020\02-FEB\050220\142->

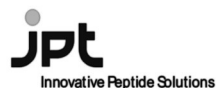

Injection Date : Thu, 6. Feb. 2020  
Sample Name : 240120SG1-72|42454Dar081  
Acq Operator : SYSTEM  
Acq. Method : D:\Data\2020\02-FEB\050220\1428\5-95-6M.M  
column used :  
Analysis Method : C:\Chem32\1\METHODS\DEF\_LC.M

Sample Info : 42454\_081-Dr. Martine Darwish|H-LKYCHLLVL-OH

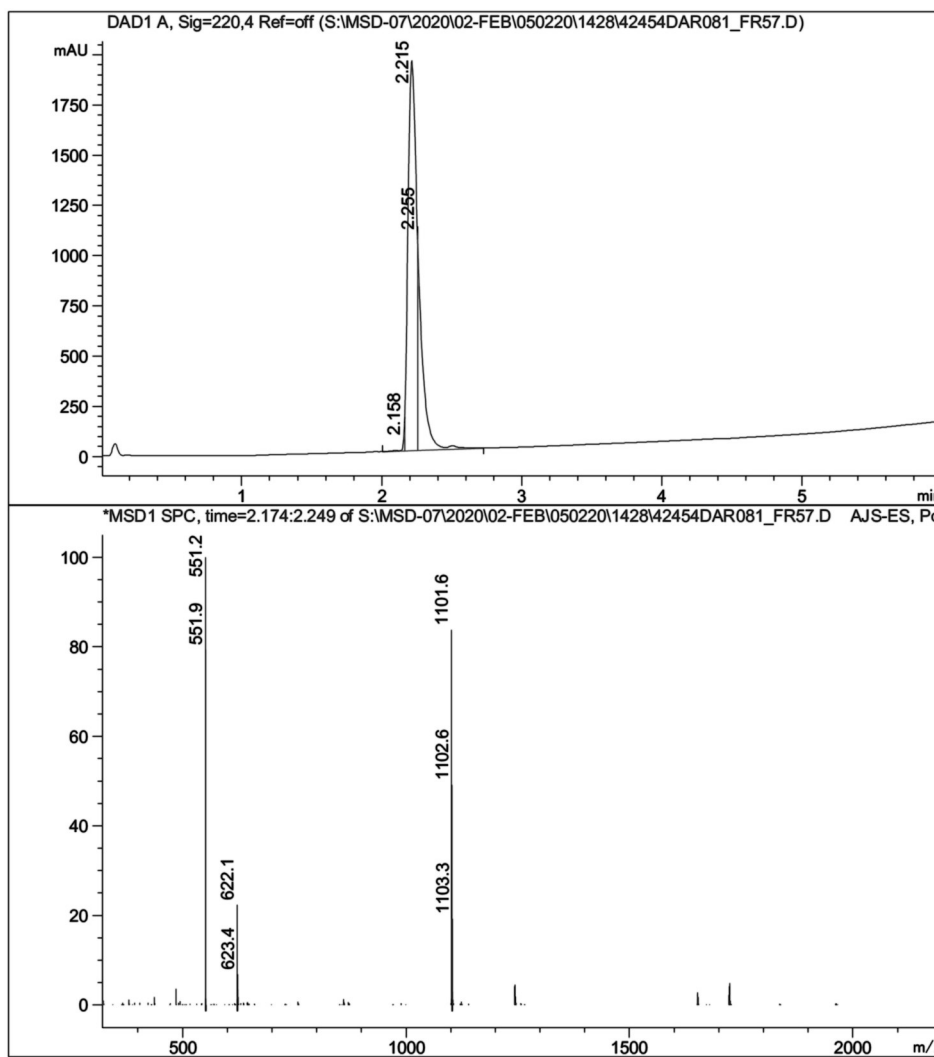

Signal 1: DAD1 A, Sig=220,4 Ref=off

| Peak # | RT [min] | Width [min] | Area   | Area % |
|--------|----------|-------------|--------|--------|
| 1      | 2.158    | 0.0         | 105.4  | 1.0    |
| 2      | 2.215    | 0.1         | 7570.3 | 74.5   |
| 3      | 2.255    | 0.0         | 2480.5 | 24.4   |

\*\*\* End of Report \*\*\*

Data File : S:/MSD-07/2020/02-FEB/050220/1428/42454DAR082\_FR8->  
 Injection Date : 06-Feb-20, 03:40:59  
 Sample Name : 42454DAR082\_FR80-81  
 Remarks : Baseline corrected  
 Acq. Method : D:/METHODS/5-95-6M.M  
 column used : Je\_559  
 Analysis Method : C:/CHEM32/1/METHODS/JPT-LCMS.M



Sample Info : 42454\_082-Dr. Martine Darwish H-FAINMETCWI-OH

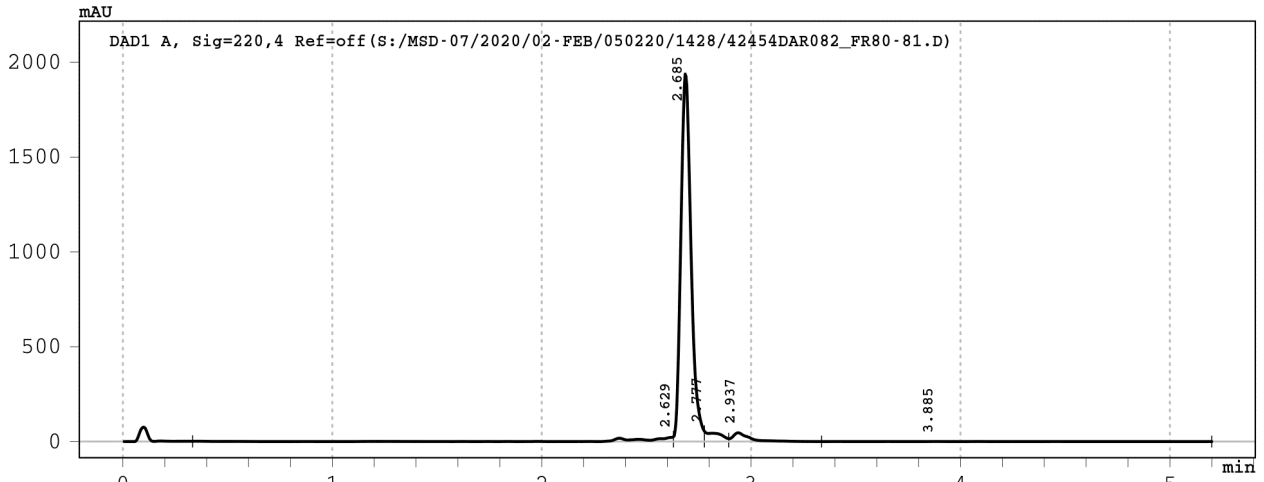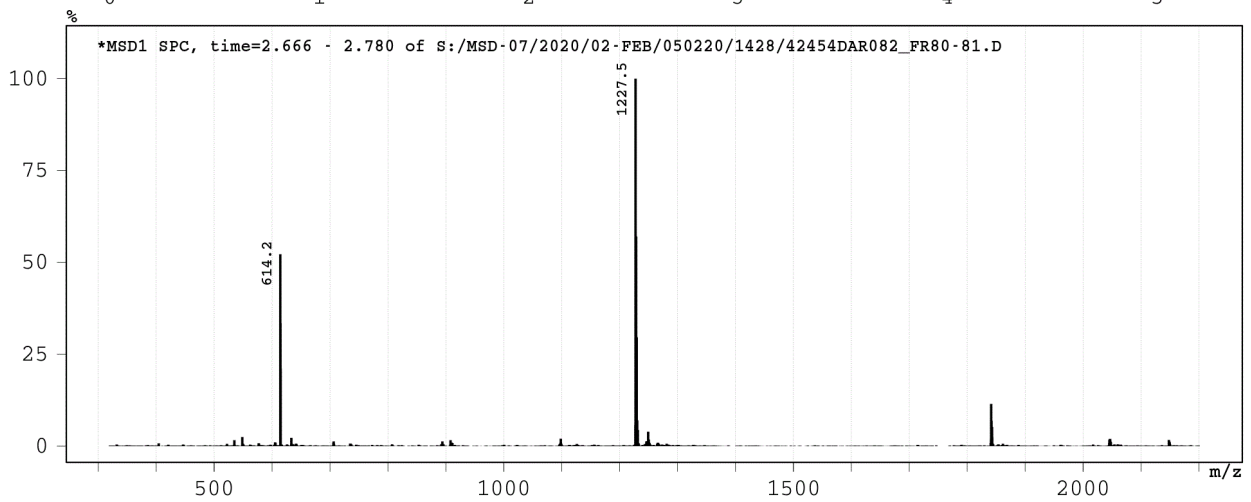

Signal 1: DAD1 A, Sig=220,4 Ref=off

| Peak # | RT [min] | Width [min] | Area   | Area % |
|--------|----------|-------------|--------|--------|
| 1      | 2.629    | 2.30        | 254.6  | 3.5    |
| 2      | 2.685    | 0.15        | 6563.4 | 89.5   |
| 3      | 2.777    | 0.12        | 257.7  | 3.5    |
| 4      | 2.937    | 0.44        | 253.4  | 3.5    |
| 5      | 3.885    | 1.86        | 4.5    | 0.1    |



Data File : S:/MSD-07/2020/02-FEB/050220/1428/42454DAR083\_FR1->  
 Injection Date : 06-Feb-20, 03:49:22  
 Sample Name : 42454DAR083\_FR100+1-2  
 Remarks : Baseline corrected  
 Acq. Method : D:/METHODS/5-95-6M.M  
 column used : Je\_559  
 Analysis Method : C:/CHEM32/1/METHODS/JPT-LCMS.M



Sample Info : 42454\_083-Dr. Martine Darwish H-TSLECLSNL-OH

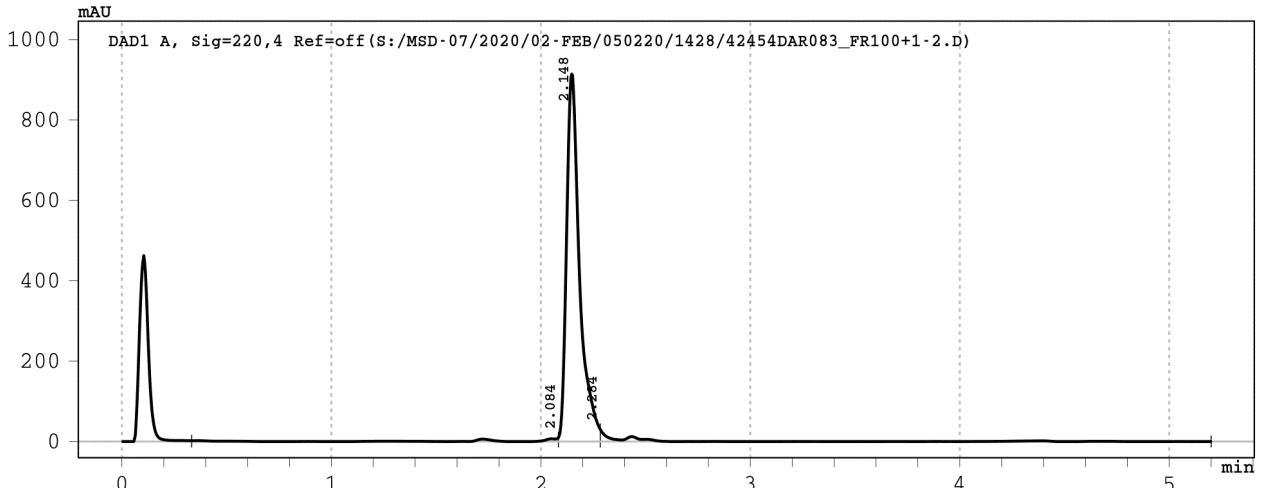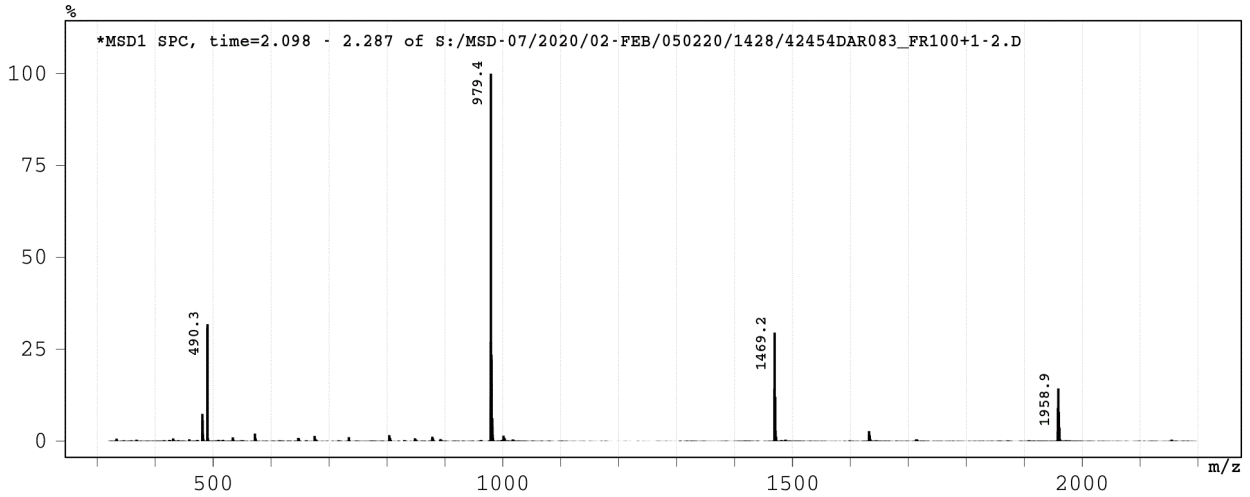

Signal 1: DAD1 A, Sig=220,4 Ref=off

| Peak # | RT [min] | Width [min] | Area   | Area % |
|--------|----------|-------------|--------|--------|
| 1      | 2.084    | 1.75        | 92.8   | 2.2    |
| 2      | 2.148    | 0.20        | 3944.1 | 93.9   |
| 3      | 2.284    | 2.92        | 164.8  | 3.9    |

Data File: S:\MSD-07\2020\02-FEB\050220\142->

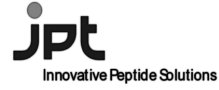

Injection Date : Thu, 6. Feb. 2020  
Sample Name : 240120SGI-74|42454Dar084  
Acq Operator : SYSTEM  
Acq Method : D:\Data\2020\02-FEB\050220\1428\5-95-6M.M  
column used :  
Analysis Method : C:\Chen82\1\METHODS\DEF\_LC.M

Sample Info : 42454\_084- Dr. Martine Darwish|H-CTFSLTKL-CH

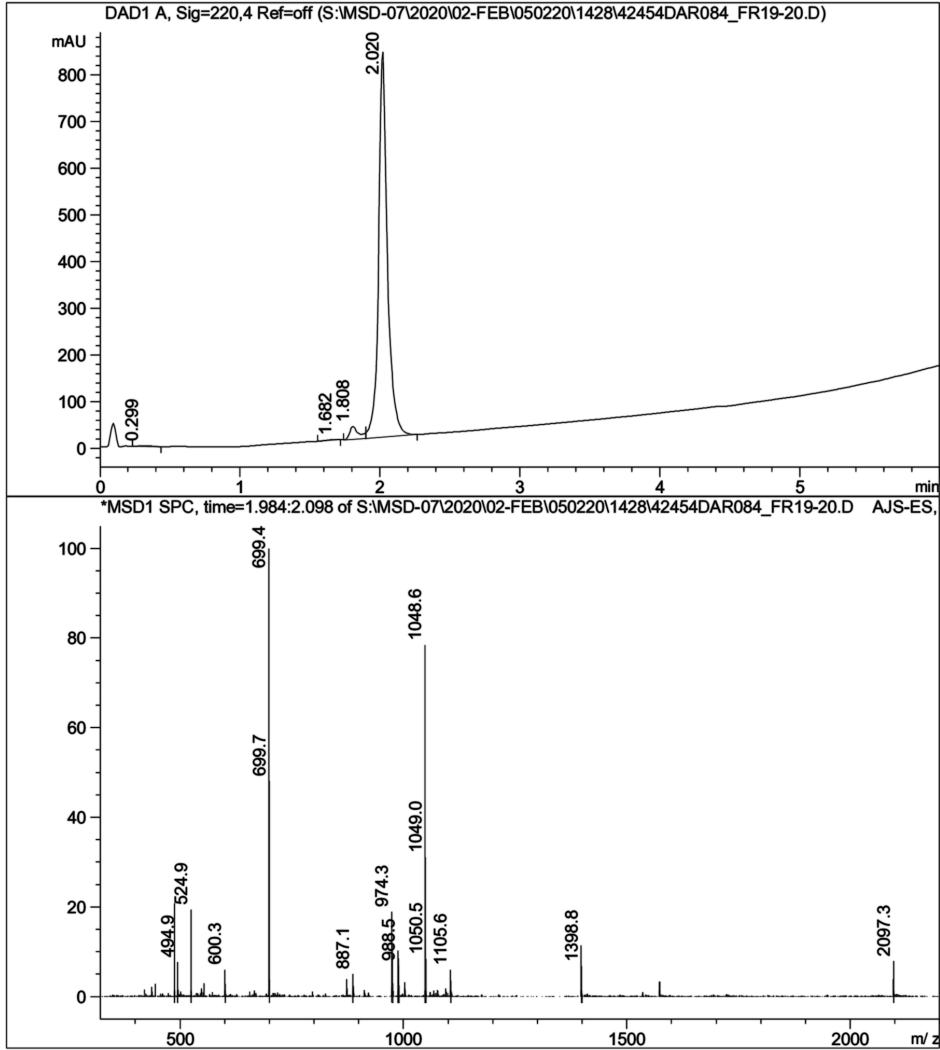

Signal 1: DAD1 A, Sig=220, 4 Ref=off

| Peak # | RT [min] | Width [min] | Area   | Area % |
|--------|----------|-------------|--------|--------|
| 1      | 0.299    | 0.1         | 8.1    | 0.2    |
| 2      | 1.682    | 0.1         | 6.5    | 0.2    |
| 3      | 1.808    | 0.1         | 125.8  | 3.4    |
| 4      | 2.020    | 0.1         | 3612.3 | 96.3   |

\*\*\* End of Report \*\*\*

Data File : S:/MSD-07/2020/02-FEB/060220/1429/42454DAR085\_FR2->



Injection Date : 06-Feb-20, 14:59:48  
Sample Name : 42454DAR085\_FR24-25  
Remarks : Baseline corrected  
Acq. Method : D:/METHODS/5-95-6M.M  
column used : Je\_559  
Analysis Method : C:/CHEM32/1/METHODS/JPT-LCMS.M

Sample Info : 42454\_085-Dr. Martine Darwish H-SIYSSRRFHV-OH

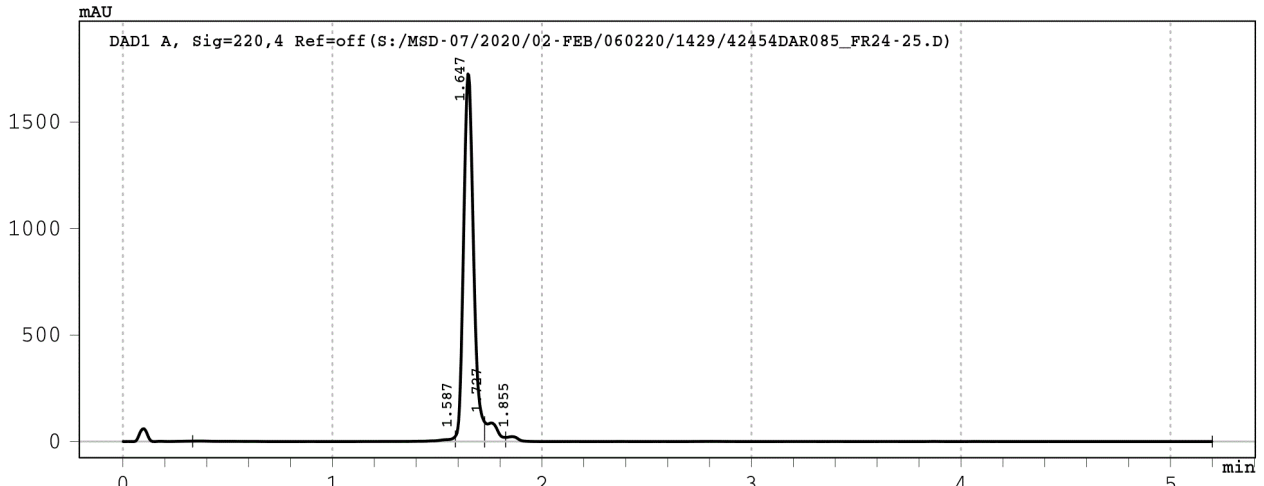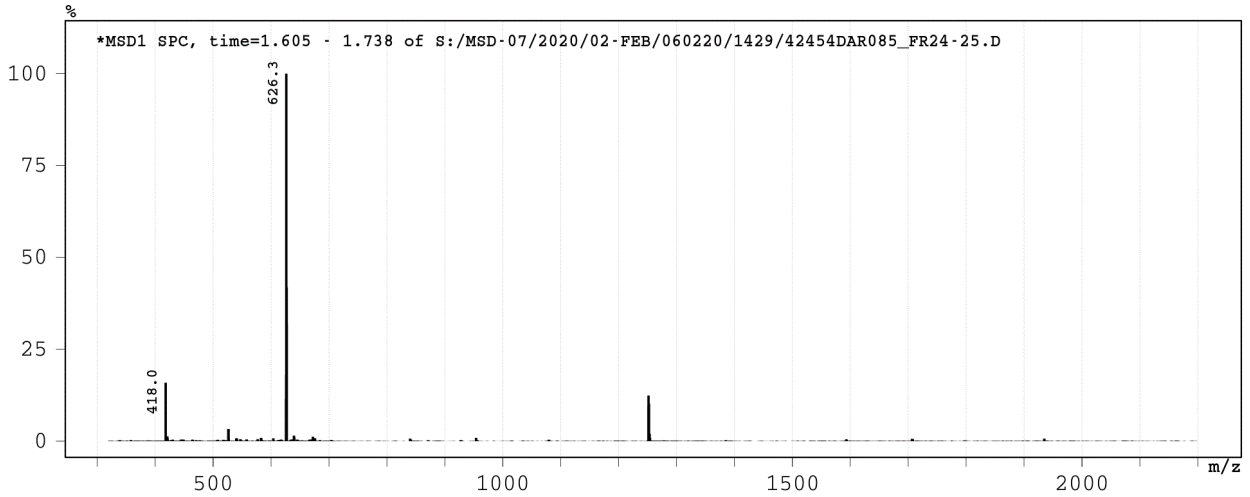

Signal 1: DAD1 A, Sig=220,4 Ref=off

| Peak # | RT [min] | Width [min] | Area   | Area % |
|--------|----------|-------------|--------|--------|
| 1      | 1.587    | 1.25        | 93.9   | 1.5    |
| 2      | 1.647    | 0.14        | 5693.9 | 91.1   |
| 3      | 1.727    | 0.10        | 361.7  | 5.8    |
| 4      | 1.855    | 3.37        | 97.6   | 1.6    |

Data File : S:/MSD-07/2020/02-FEB/060220/1429/42454DAR086\_FR4->  
 Injection Date : 06-Feb-20, 15:08:11  
 Sample Name : 42454DAR086\_FR41-42  
 Remarks : Baseline corrected  
 Acq. Method : D:/METHODS/5-95-6M.M  
 column used : Je\_559  
 Analysis Method : C:/CHEM32/1/METHODS/JPT-LCMS.M



Sample Info : 42454\_086-Dr. Martine Darwish H-ISYLGKNATI-OH

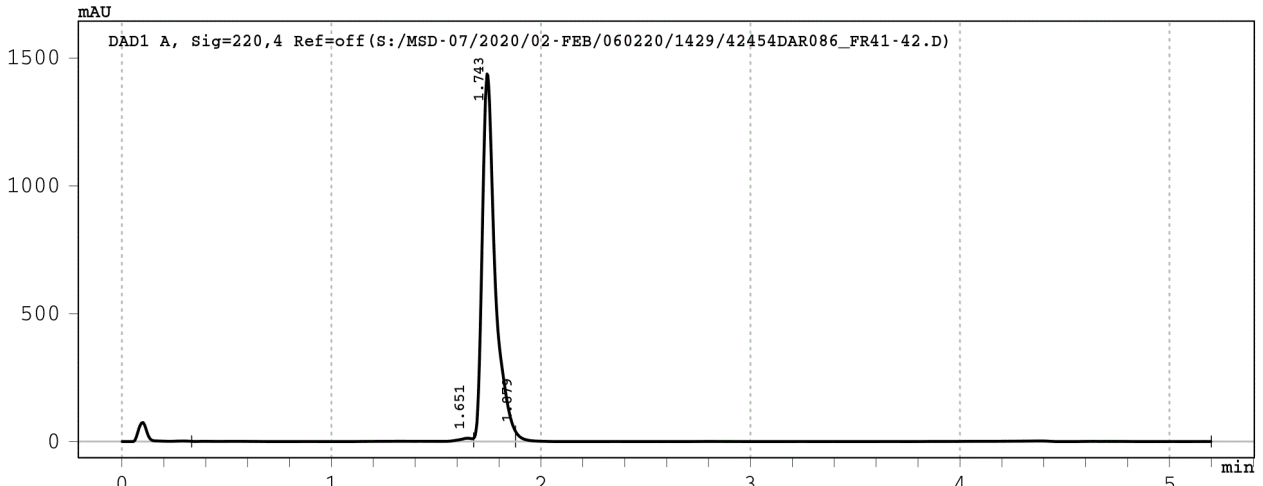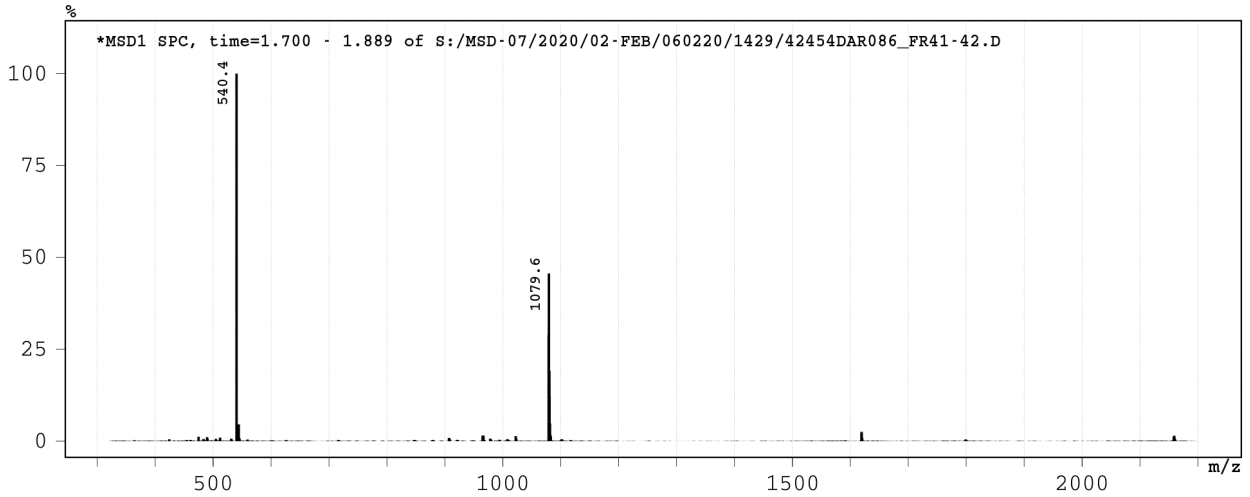

Signal 1: DAD1 A, Sig=220,4 Ref=off

| Peak # | RT [min] | Width [min] | Area   | Area % |
|--------|----------|-------------|--------|--------|
| 1      | 1.651    | 1.35        | 94.5   | 1.5    |
| 2      | 1.743    | 0.20        | 6153.8 | 96.6   |
| 3      | 1.879    | 3.32        | 123.6  | 1.9    |

Data File : S:/MSD-07/2020/02-FEB/060220/1429/42454DAR087\_FR5->



Injection Date : 06-Feb-20, 15:16:34  
Sample Name : 42454DAR087\_FR51-52  
Remarks : Baseline corrected  
Acq. Method : D:/METHODS/5-95-6M.M  
column used : Je\_559  
Analysis Method : C:/CHEM32/1/METHODS/JPT-LCMS.M

Sample Info : 42454\_087-Dr. Martine Darwish H-SHYRAYIL-OH

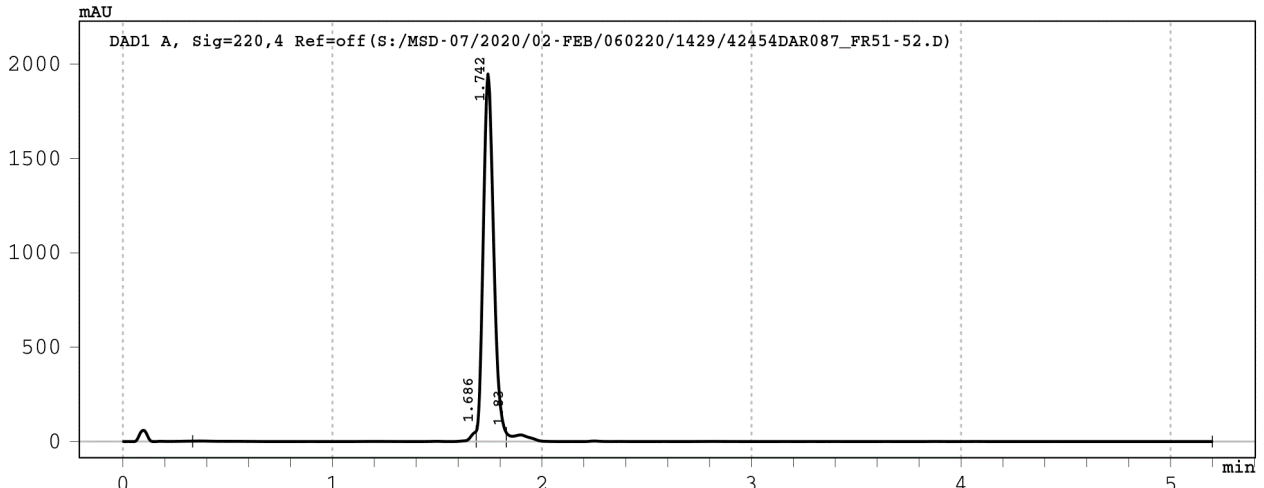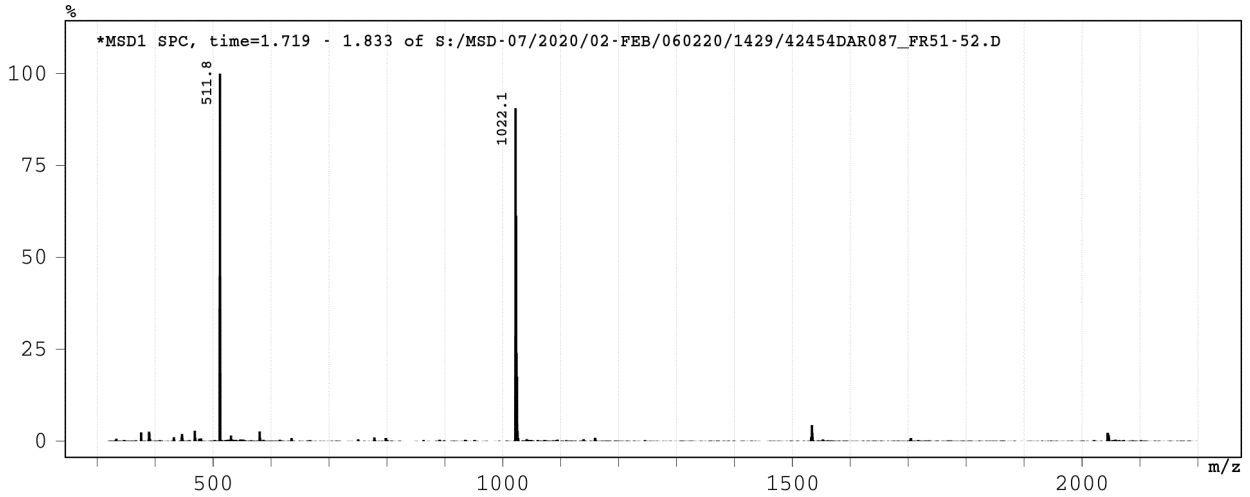

Signal 1: DAD1 A, Sig=220,4 Ref=off

| Peak # | RT [min] | Width [min] | Area   | Area % |
|--------|----------|-------------|--------|--------|
| 1      | 1.686    | 1.35        | 126.3  | 1.8    |
| 2      | 1.742    | 0.14        | 6739.1 | 94.5   |
| 3      | 1.830    | 3.37        | 265.2  | 3.7    |

Data File : S:/MSD-07/2020/02-FEB/060220/1429/42454DAR088\_FR7->



Injection Date : 06-Feb-20, 15:33:58  
Sample Name : 42454DAR088\_FR72-73  
Remarks : Baseline corrected  
Acq. Method : D:/METHODS/5-95-6M.M  
column used : Je\_559  
Analysis Method : C:/CHEM32/1/METHODS/JPT-LCMS.M

Sample Info : 42454\_088-Dr. Martine Darwish H-VFFPRHREL-OH

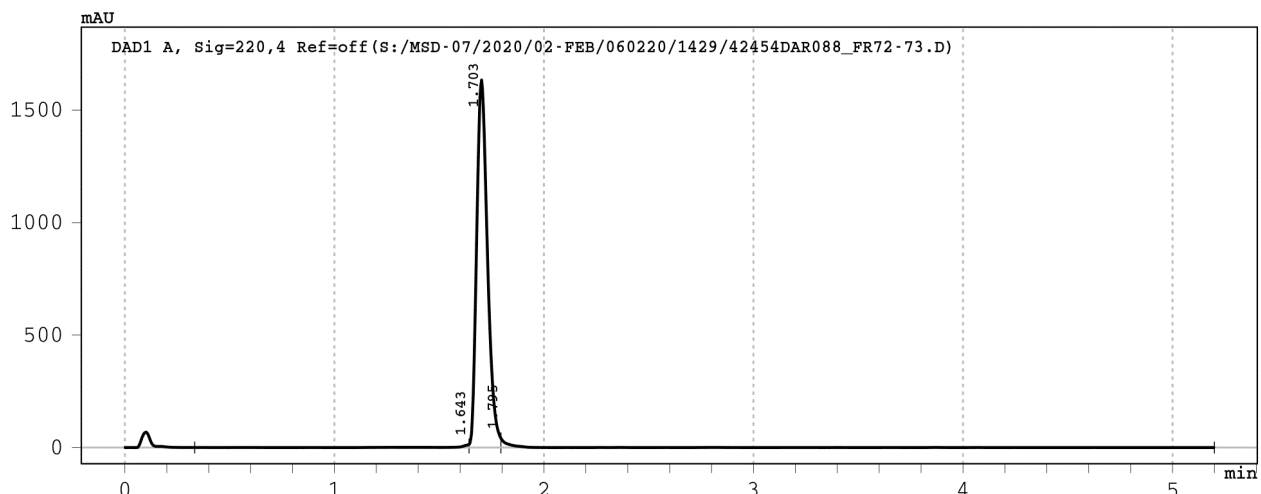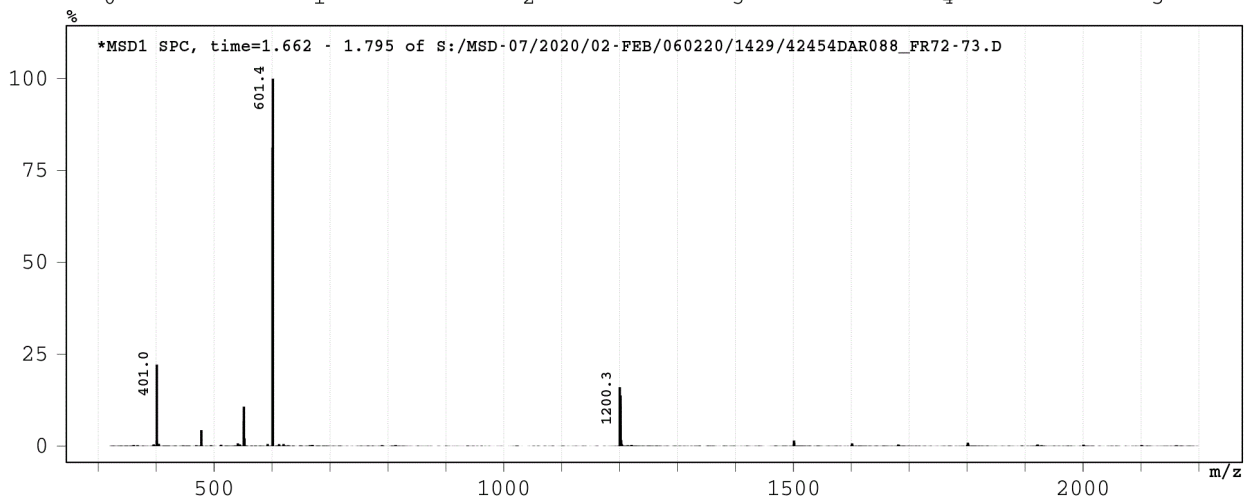

Signal 1: DAD1 A, Sig=220,4 Ref=off

| Peak # | RT [min] | Width [min] | Area   | Area % |
|--------|----------|-------------|--------|--------|
| 1      | 1.643    | 1.31        | 47.6   | 0.8    |
| 2      | 1.703    | 0.15        | 5855.9 | 97.5   |
| 3      | 1.795    | 3.41        | 104.2  | 1.7    |

Data File : S:/MSD-07/2020/02-FEB/050220/1428/42454DAR089\_FR3->  
 Injection Date : 06-Feb-20, 04:14:36  
 Sample Name : 42454DAR089\_FR38-39  
 Remarks : Baseline corrected  
 Acq. Method : D:/METHODS/5-95-6M.M  
 column used : Je\_559  
 Analysis Method : C:/CHEM32/1/METHODS/JPT-LCMS.M



Sample Info : 42454\_089-Dr. Martine Darwish H-MTYLHNLEM-OH

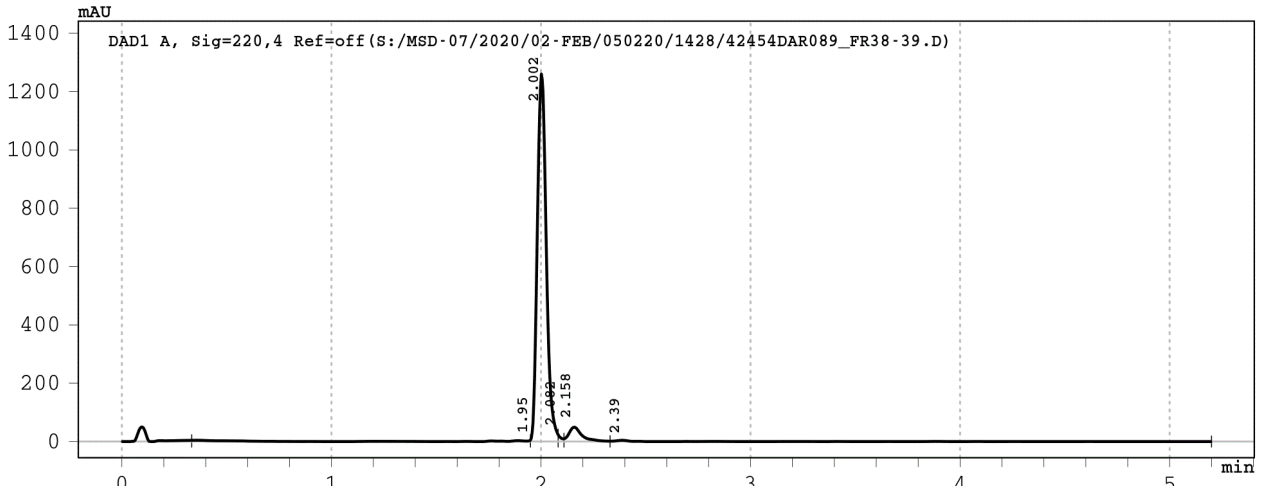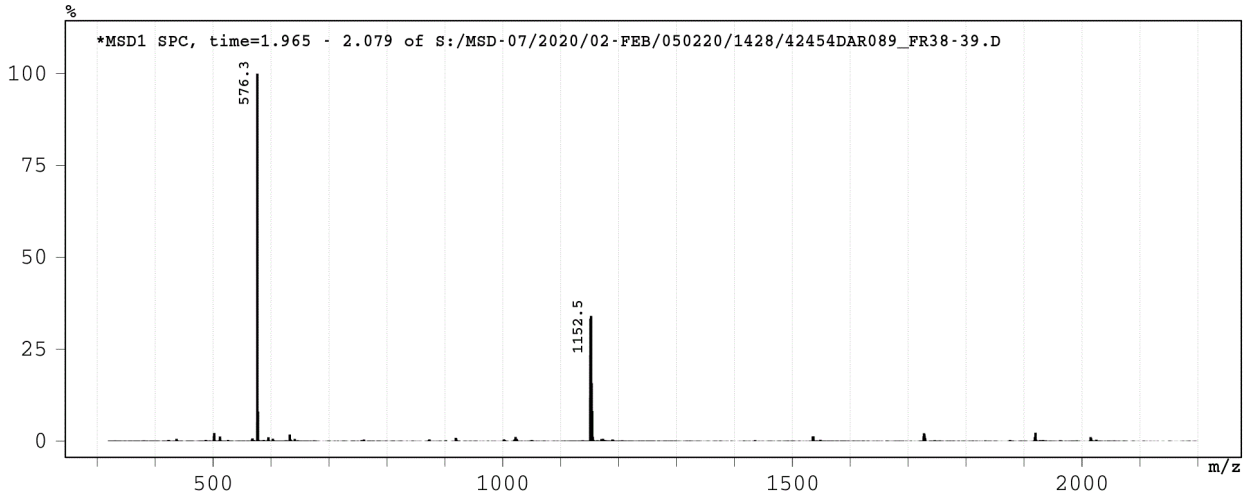

Signal 1: DAD1 A, Sig=220,4 Ref=off

| Peak # | RT [min] | Width [min] | Area   | Area % |
|--------|----------|-------------|--------|--------|
| 1      | 1.950    | 1.62        | 93.1   | 2.3    |
| 2      | 2.002    | 0.13        | 3754.4 | 91.2   |
| 3      | 2.082    | 0.03        | 22.5   | 0.5    |
| 4      | 2.158    | 0.22        | 217.7  | 5.3    |
| 5      | 2.390    | 2.87        | 30.4   | 0.7    |

Data File : S:/MSD-07/2020/02-FEB/050220/1428/42454DAR090\_FR4->  
 Injection Date : 06-Feb-20, 04:23:01  
 Sample Name : 42454DAR090\_FR45-46  
 Remarks : Baseline corrected  
 Acq. Method : D:/METHODS/5-95-6M.M  
 column used : Je\_559  
 Analysis Method : C:/CHEM32/1/METHODS/JPT-LCMS.M



Sample Info : 42454\_090-Dr. Martine Darwish H-IVLEHMNI-OH

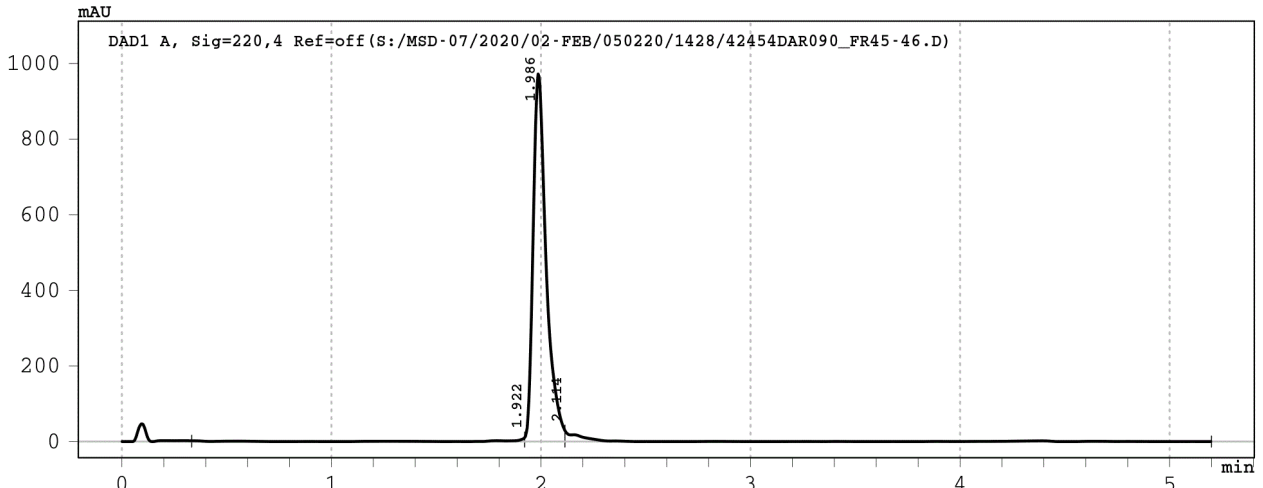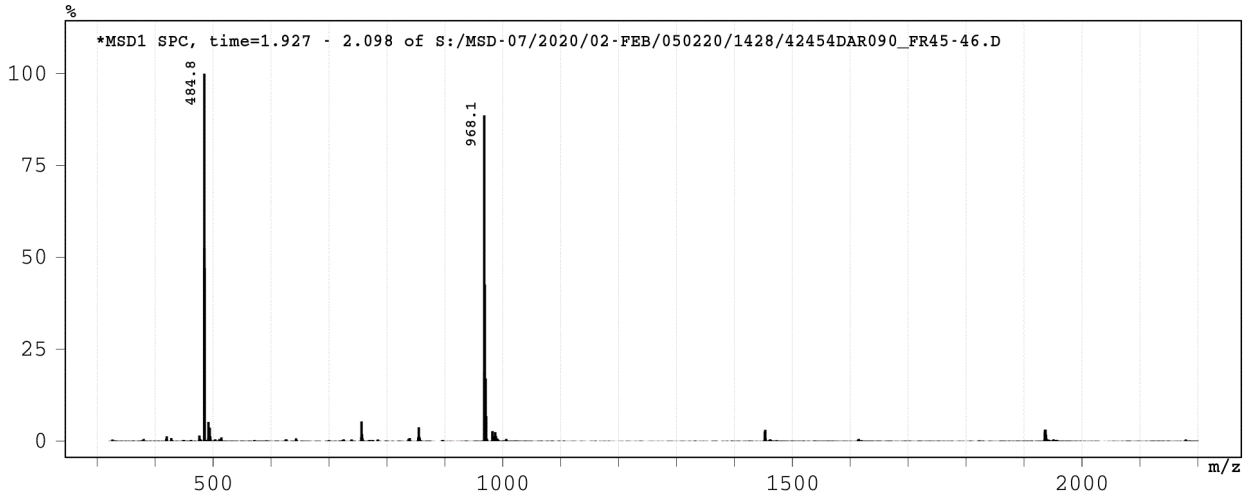

Signal 1: DAD1 A, Sig=220,4 Ref=off

| Peak # | RT [min] | Width [min] | Area   | Area % |
|--------|----------|-------------|--------|--------|
| 1      | 1.922    | 1.59        | 60.4   | 1.4    |
| 2      | 1.986    | 0.19        | 4225.9 | 94.7   |
| 3      | 2.114    | 3.09        | 174.1  | 3.9    |



Data File : S:/MSD-07/2020/02-FEB/050220/1428/42454DAR091\_FR1->



Injection Date : 05-Feb-20, 18:16:57  
Sample Name : 42454DAR091\_FR12  
Remarks : Baseline corrected  
Acq. Method : D:/METHODS/5-95-6M.M  
column used : Je\_559  
Analysis Method : C:/CHEM32/1/METHODS/JPT-LCMS.M

Sample Info : 42454\_091-Dr. Martine Darwish H-LSFAQRTLYM-OH

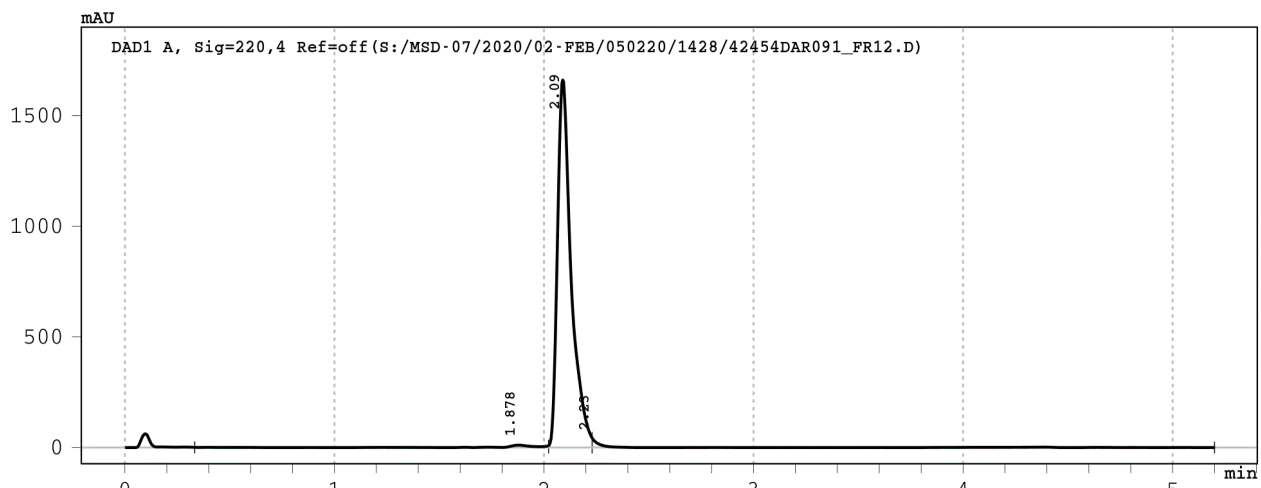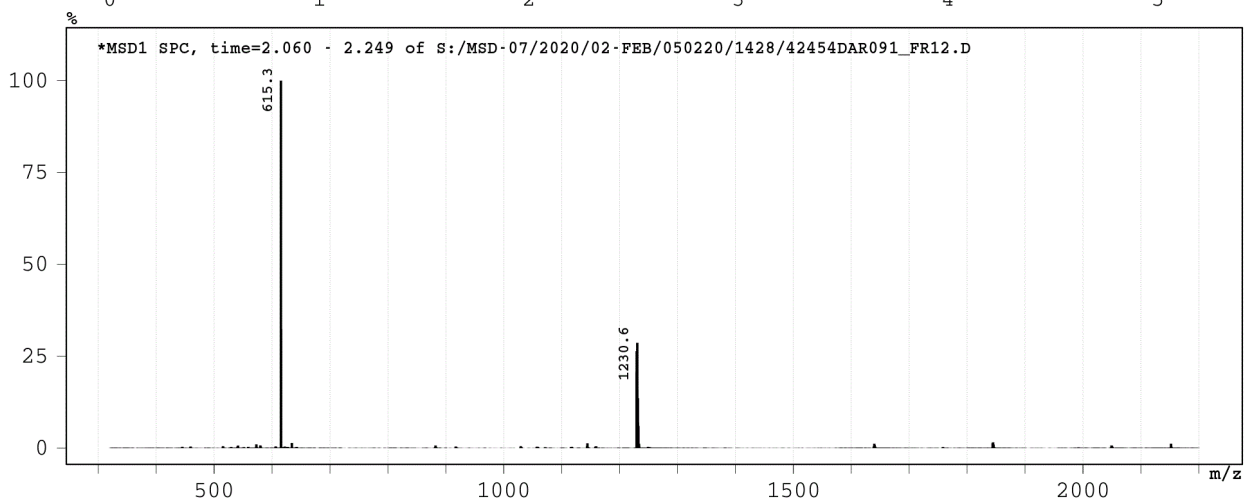

Signal 1: DAD1 A, Sig=220,4 Ref=off

| Peak # | RT [min] | Width [min] | Area   | Area % |
|--------|----------|-------------|--------|--------|
| 1      | 1.878    | 1.69        | 114.6  | 1.5    |
| 2      | 2.090    | 0.21        | 7561.6 | 96.8   |
| 3      | 2.230    | 2.97        | 138.3  | 1.8    |

Data File : S:/MSD-07/2020/02-FEB/050220/1428/42454DAR092\_FR2->



Injection Date : 05-Feb-20, 18:25:21  
Sample Name : 42454DAR092\_FR27-28  
Remarks : Baseline corrected  
Acq. Method : D:/METHODS/5-95-6M.M  
column used : Je\_559  
Analysis Method : C:/CHEM32/1/METHODS/JPT-LCMS.M

Sample Info : 42454\_092-Dr. Martine Darwish H-MNIAHLHL-OH

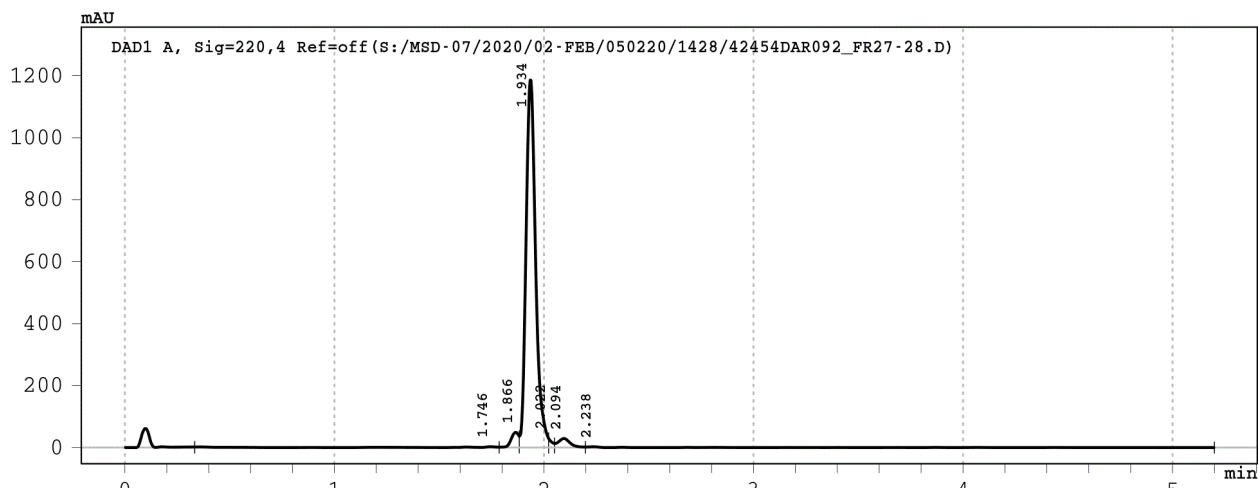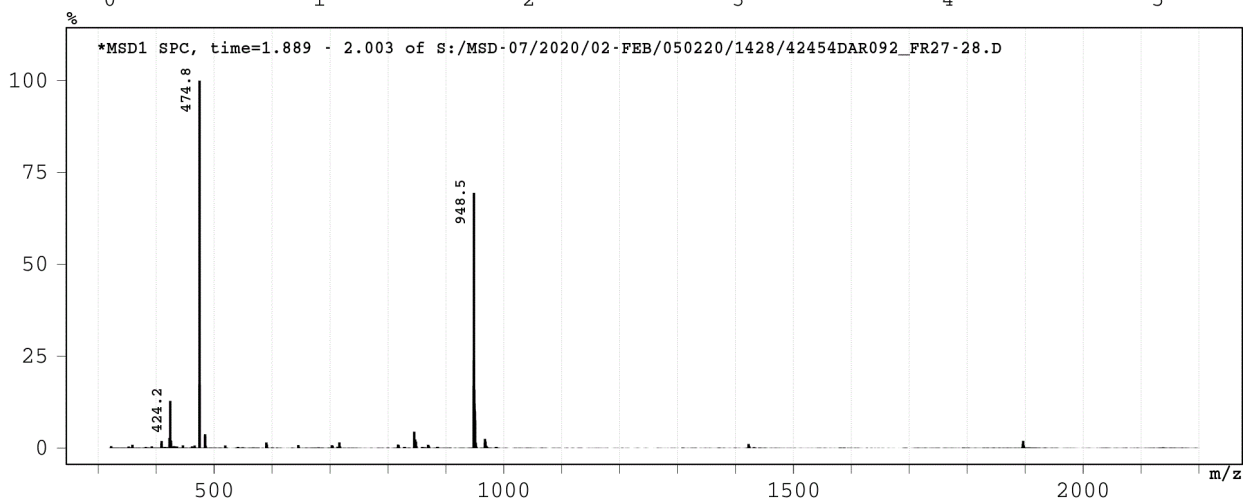

Signal 1: DAD1 A, Sig=220,4 Ref=off

| Peak # | RT [min] | Width [min] | Area   | Area % |
|--------|----------|-------------|--------|--------|
| 1      | 1.746    | 1.45        | 44.4   | 1.1    |
| 2      | 1.866    | 0.10        | 119.8  | 2.9    |
| 3      | 1.934    | 0.14        | 3786.9 | 91.8   |
| 4      | 2.022    | 0.03        | 32.0   | 0.8    |
| 5      | 2.094    | 0.15        | 118.5  | 2.9    |
| 6      | 2.238    | 3.00        | 21.8   | 0.5    |

Data File : S:/MSD-07/2020/02-FEB/050220/1428/42454DAR093\_FR3->



Injection Date : 05-Feb-20, 18:33:44  
Sample Name : 42454DAR093\_FR35-36  
Remarks : Baseline corrected  
Acq. Method : D:/METHODS/5-95-6M.M  
column used : Je\_559  
Analysis Method : C:/CHEM32/1/METHODS/JPT-LCMS.M

Sample Info : 42454\_093-Dr. Martine Darwish H-CAYSISSGI-OH

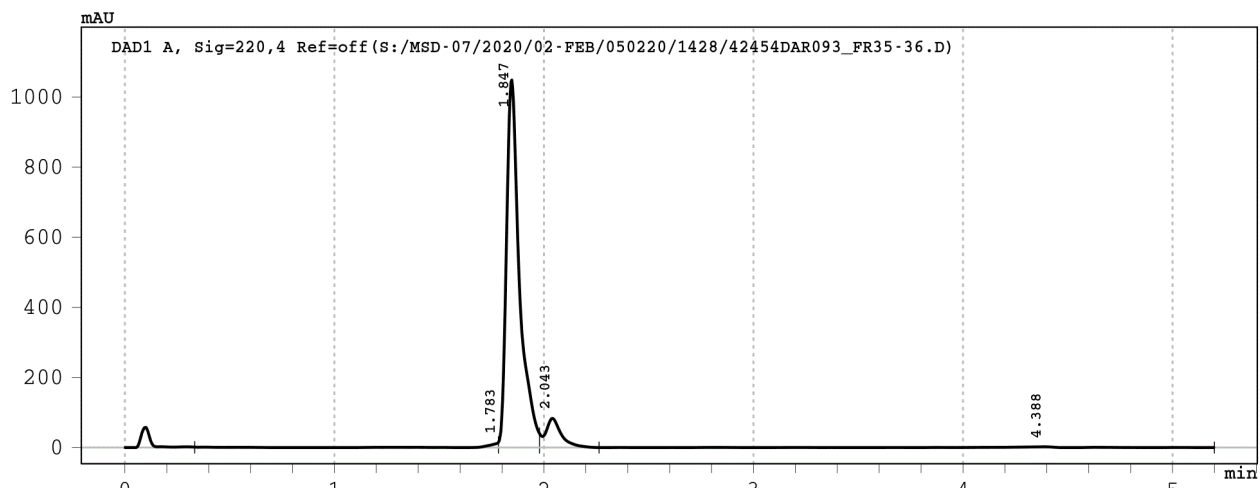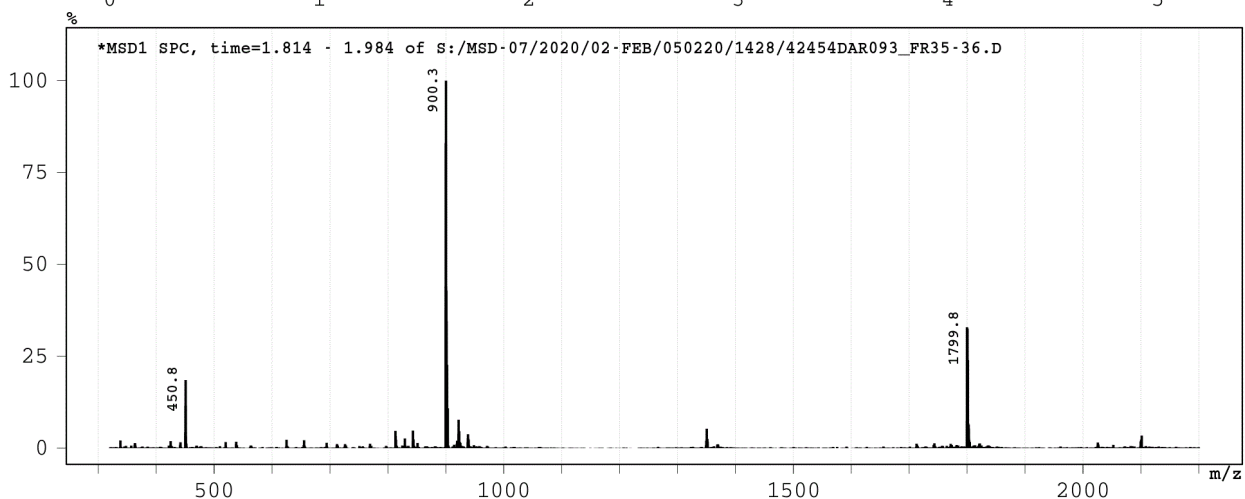

Signal 1: DAD1 A, Sig=220,4 Ref=off

| Peak # | RT [min] | Width [min] | Area   | Area % |
|--------|----------|-------------|--------|--------|
| 1      | 1.783    | 1.45        | 62.4   | 1.2    |
| 2      | 1.847    | 0.20        | 4551.2 | 89.3   |
| 3      | 2.043    | 0.28        | 443.0  | 8.7    |
| 4      | 4.388    | 2.94        | 42.1   | 0.8    |

Data File : S:/MSD-07/2020/02-FEB/050220/1428/42454DAR094\_FR5->



Injection Date : 05-Feb-20, 18:42:10  
Sample Name : 42454DAR094\_FR53  
Remarks : Baseline corrected  
Acq. Method : D:/METHODS/5-95-6M.M  
column used : Je\_559  
Analysis Method : C:/CHEM32/1/METHODS/JPT-LCMS.M

Sample Info : 42454\_094-Dr. Martine Darwish H-DVYPFHMIL-OH

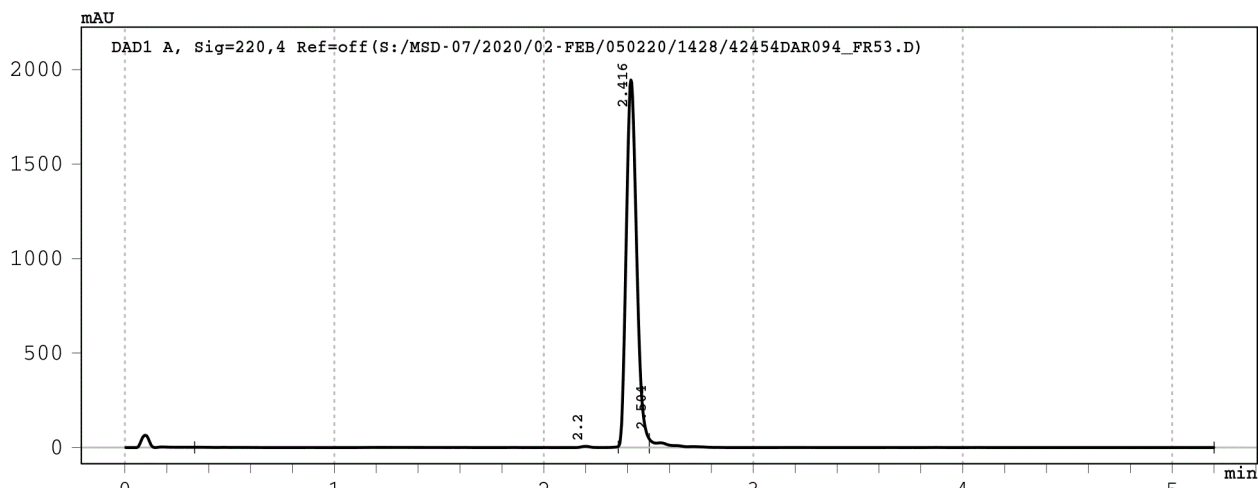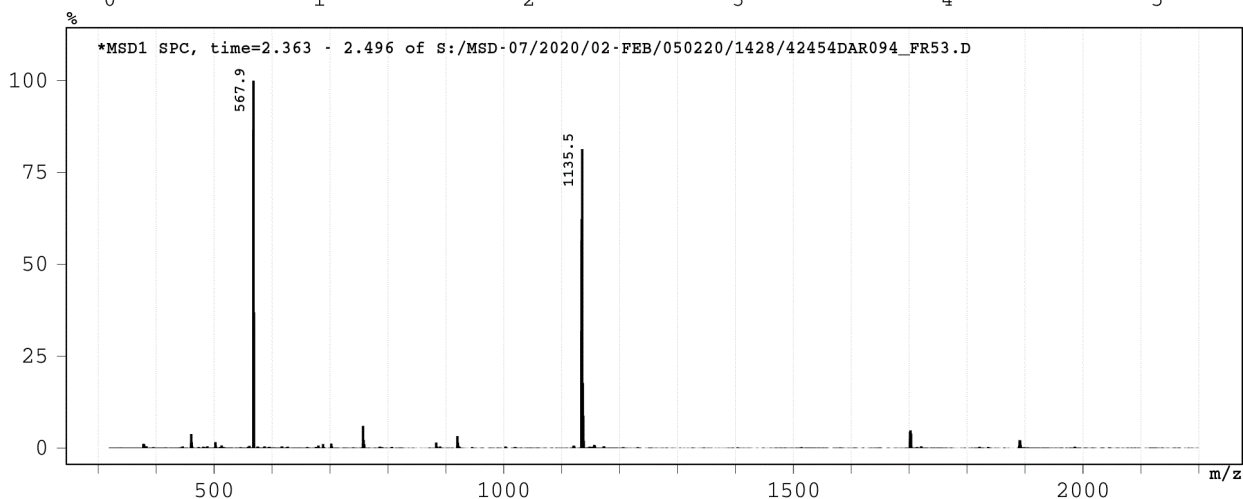

Signal 1: DAD1 A, Sig=220,4 Ref=off

| Peak # | RT [min] | Width [min] | Area   | Area % |
|--------|----------|-------------|--------|--------|
| 1      | 2.200    | 2.02        | 54.2   | 0.8    |
| 2      | 2.416    | 0.15        | 6700.8 | 96.1   |
| 3      | 2.504    | 2.70        | 214.7  | 3.1    |

Data File : S:/MSD-07/2020/02-FEB/180220/1438/42454DAR095\_FR1->  
Injection Date : 18-Feb-20, 09:49:42  
Sample Name : 42454DAR095\_FR17  
Remarks : Baseline corrected  
Acq. Method : D:/METHODS/5-95-6M.M  
column used : Je\_559  
Analysis Method : C:/CHEM32/1/METHODS/JPT-LCMS.M



Sample Info : 42454\_095-Dr. Martine Darwish H-QIYAFLQGF-OH

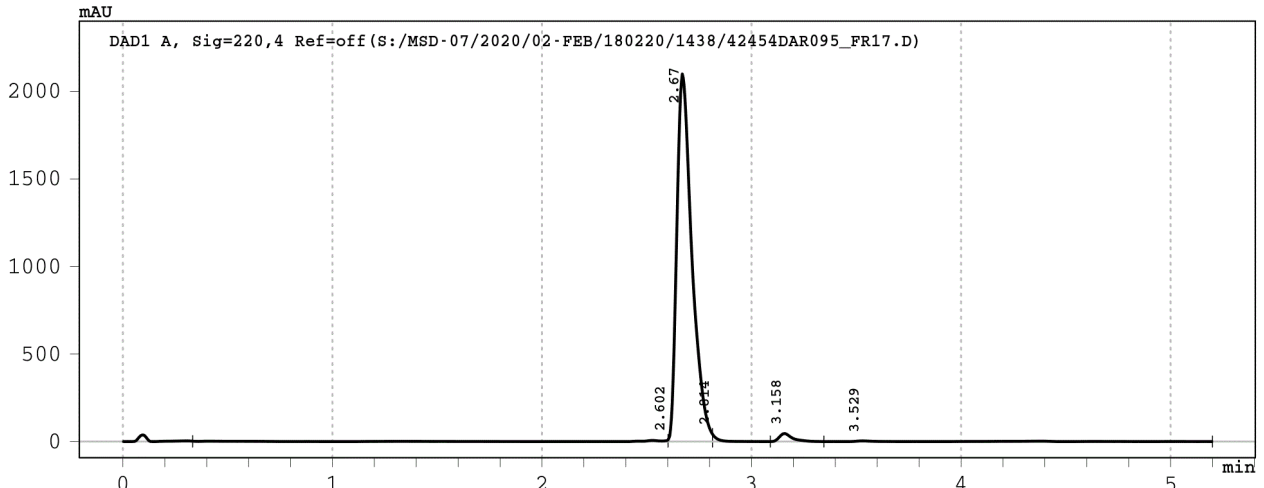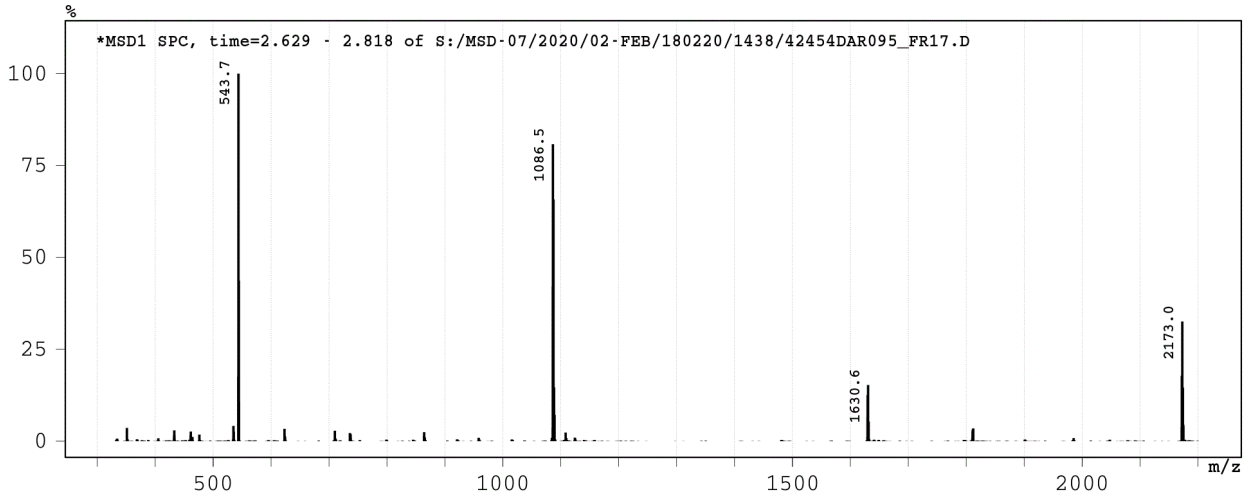

Signal 1: DAD1 A, Sig=220,4 Ref=off

| Peak # | RT [min] | Width [min] | Area    | Area % |
|--------|----------|-------------|---------|--------|
| 1      | 2.602    | 2.27        | 101.7   | 0.9    |
| 2      | 2.670    | 0.21        | 10521.8 | 96.2   |
| 3      | 2.814    | 0.28        | 60.1    | 0.5    |
| 4      | 3.158    | 0.26        | 195.7   | 1.8    |
| 5      | 3.529    | 1.85        | 60.0    | 0.5    |

Data File : S:/MSD-07/2020/02-FEB/060220/1429/42454DAR096\_FR2->



Injection Date : 06-Feb-20, 15:42:21  
Sample Name : 42454DAR096\_FR2-3  
Remarks : Baseline corrected  
Acq. Method : D:/METHODS/5-95-6M.M  
column used : Je\_559  
Analysis Method : C:/CHEM32/1/METHODS/JPT-LCMS.M

Sample Info : 42454\_096-Dr. Martine Darwish H-PSLLNWTRV-OH

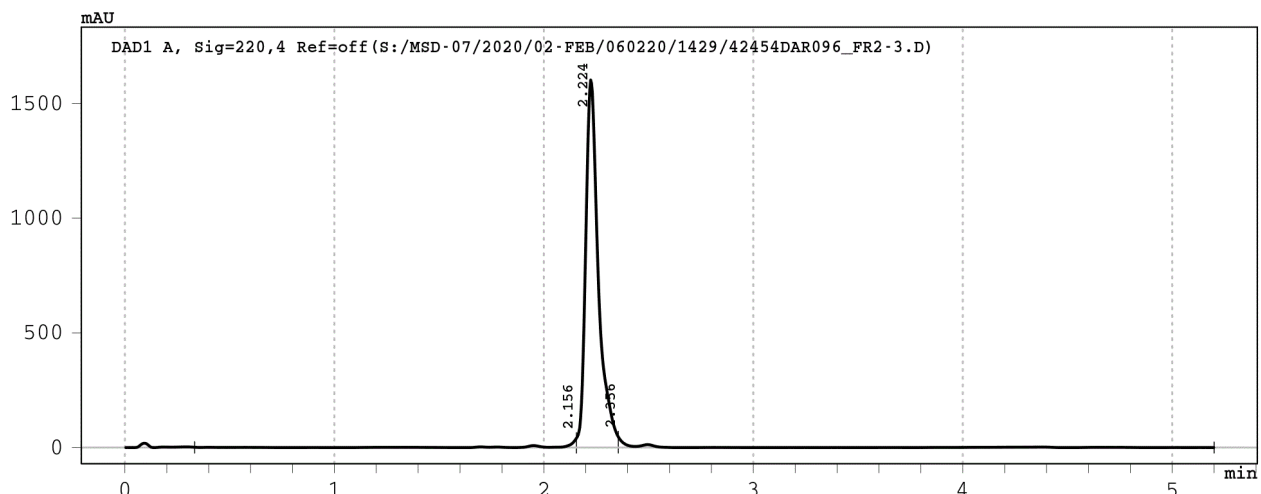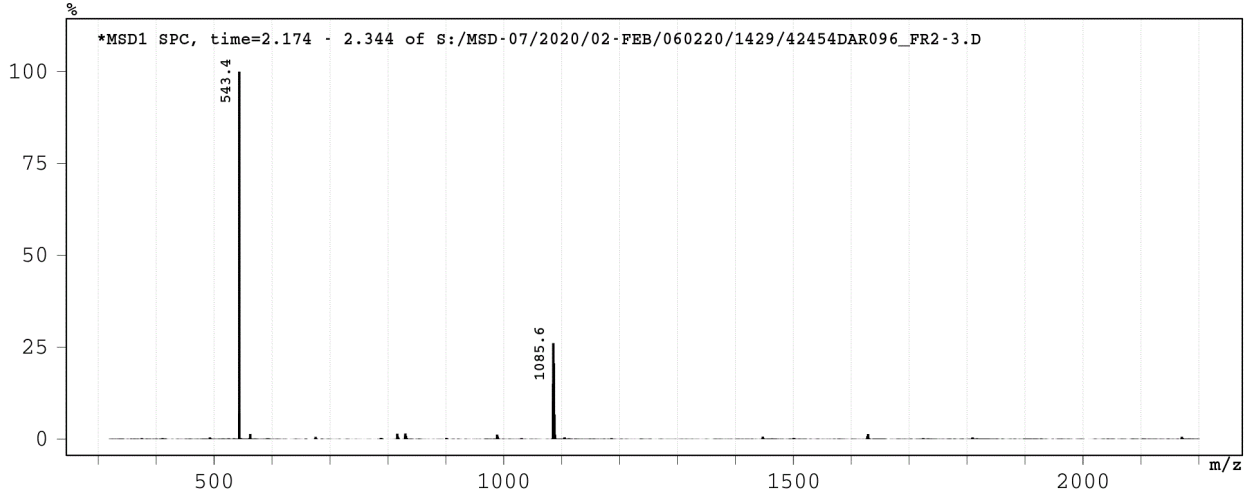

Signal 1: DAD1 A, Sig=220,4 Ref=off

| Peak # | RT [min] | Width [min] | Area   | Area % |
|--------|----------|-------------|--------|--------|
| 1      | 2.156    | 1.82        | 142.8  | 2.0    |
| 2      | 2.224    | 0.20        | 6782.2 | 95.3   |
| 3      | 2.356    | 2.84        | 193.8  | 2.7    |

Data File : S:/MSD-07/2020/02-FEB/060220/1429/42454DAR097\_FR3->



Injection Date : 06-Feb-20, 15:50:41  
Sample Name : 42454DAR097\_FR35-36  
Remarks : Baseline corrected  
Acq. Method : D:/METHODS/5-95-6M.M  
column used : Je\_559  
Analysis Method : C:/CHEM32/1/METHODS/JPT-LCMS.M

Sample Info : 42454\_097-Dr. Martine Darwish H-KGYPHWPAL-OH

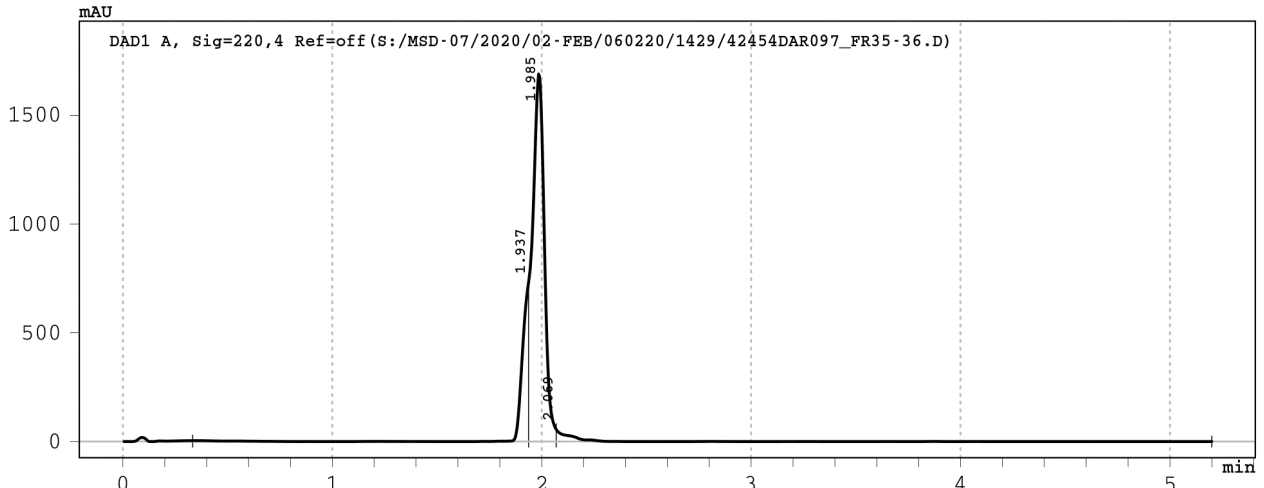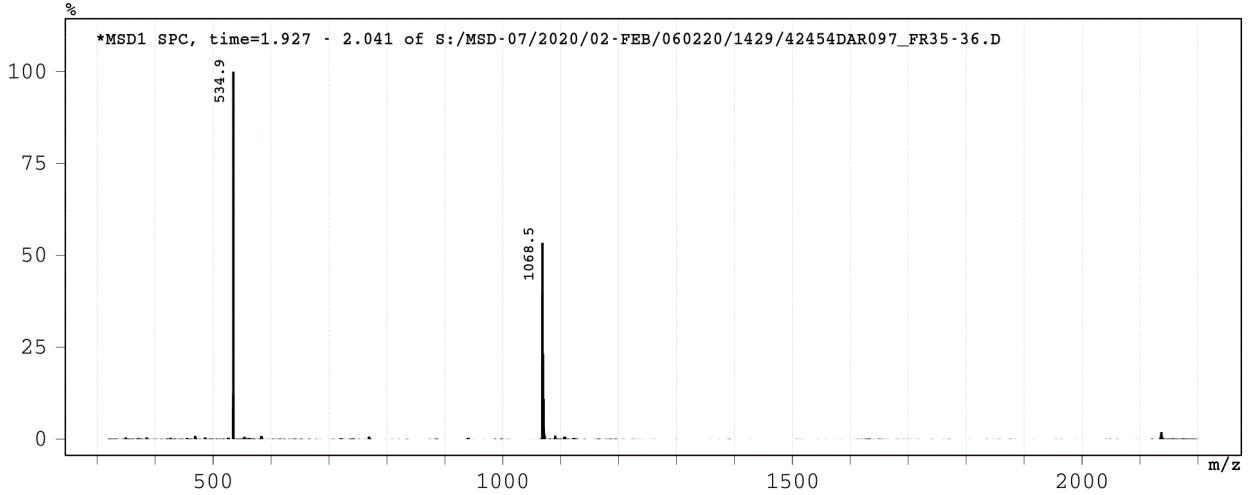

Signal 1: DAD1 A, Sig=220,4 Ref=off

| Peak # | RT [min] | Width [min] | Area   | Area % |
|--------|----------|-------------|--------|--------|
| 1      | 1.937    | 1.60        | 1482.1 | 17.7   |
| 2      | 1.985    | 0.13        | 6633.3 | 79.3   |
| 3      | 2.069    | 3.13        | 247.9  | 3.0    |

Data File : S:/MSD-07/2020/02-FEB/050220/1428/42454DAR098\_FR6->  
 Injection Date : 05-Feb-20, 18:50:35  
 Sample Name : 42454DAR098\_FR63-64  
 Remarks : Baseline corrected  
 Acq. Method : D:/METHODS/5-95-6M.M  
 column used : Je\_559  
 Analysis Method : C:/CHEM32/1/METHODS/JPT-LCMS.M



Sample Info : 42454\_098-Dr. Martine Darwish H-CVYEHTAVL-OH

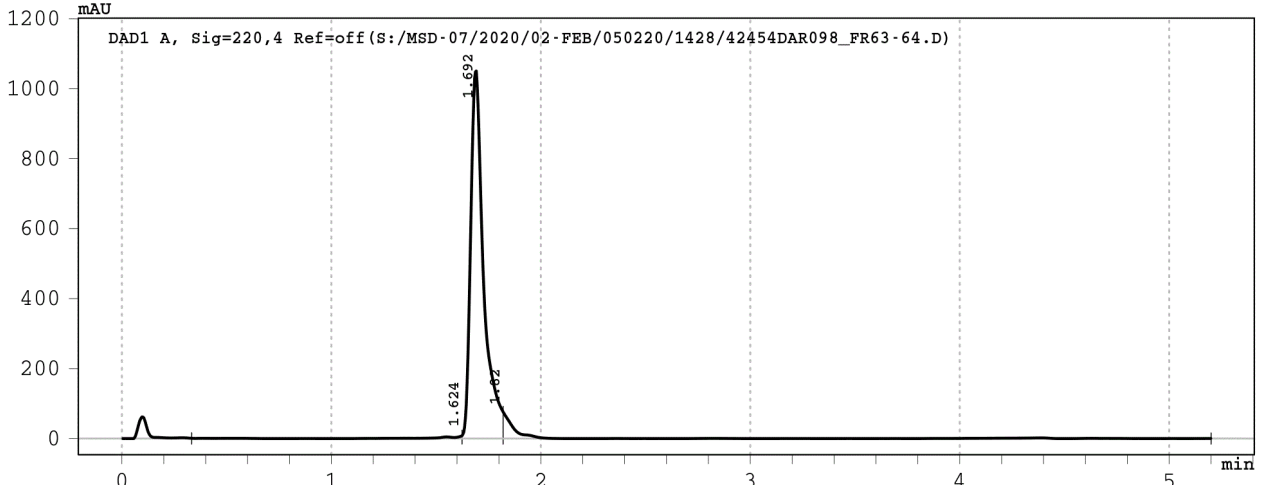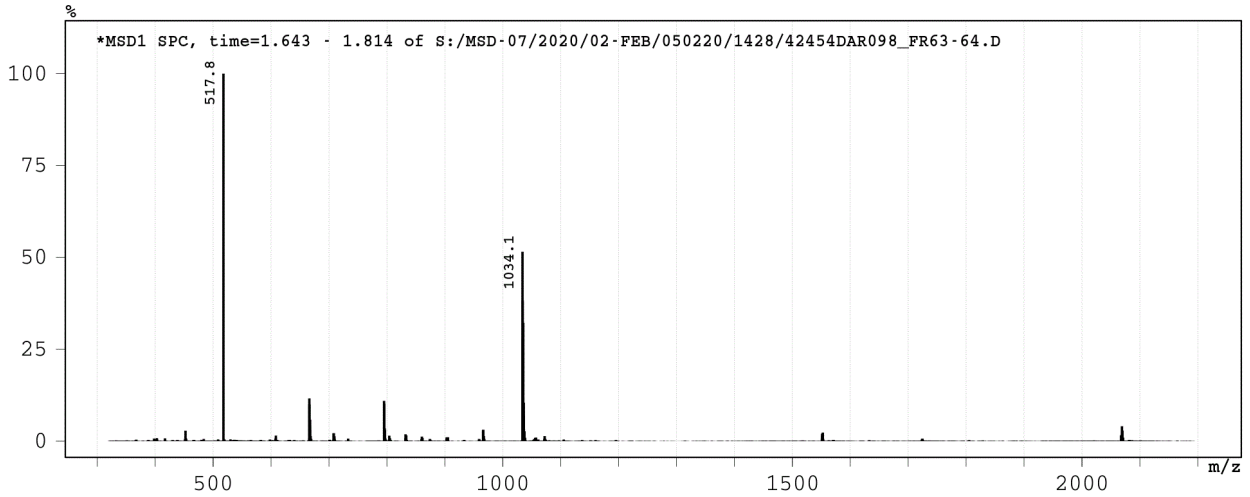

Signal 1: DAD1 A, Sig=220,4 Ref=off

| Peak # | RT [min] | Width [min] | Area   | Area % |
|--------|----------|-------------|--------|--------|
| 1      | 1.624    | 1.29        | 57.4   | 1.2    |
| 2      | 1.692    | 0.20        | 4529.8 | 92.8   |
| 3      | 1.820    | 3.38        | 291.6  | 6.0    |



Data File : S:/MSD-07/2020/02-FEB/060220/1429/42454DAR099\_FR5->  
 Injection Date : 06-Feb-20, 15:59:04  
 Sample Name : 42454DAR099\_FR53  
 Remarks : Baseline corrected  
 Acq. Method : D:/METHODS/5-95-6M.M  
 column used : Je\_559  
 Analysis Method : C:/CHEM32/1/METHODS/JPT-LCMS.M



Sample Info : 42454\_099-Dr. Martine Darwish H-ESRSRFQTL-OH

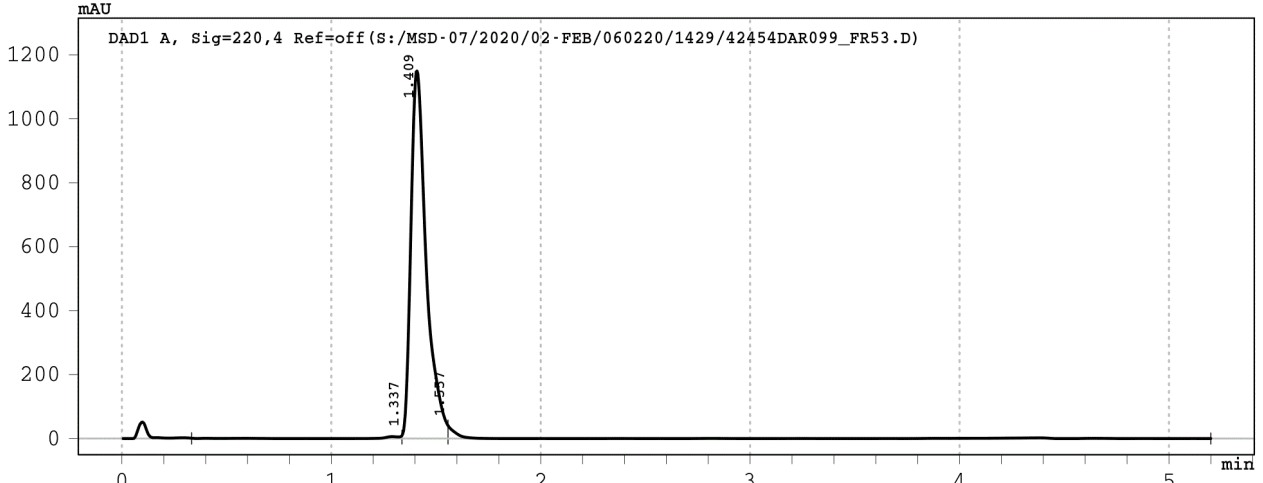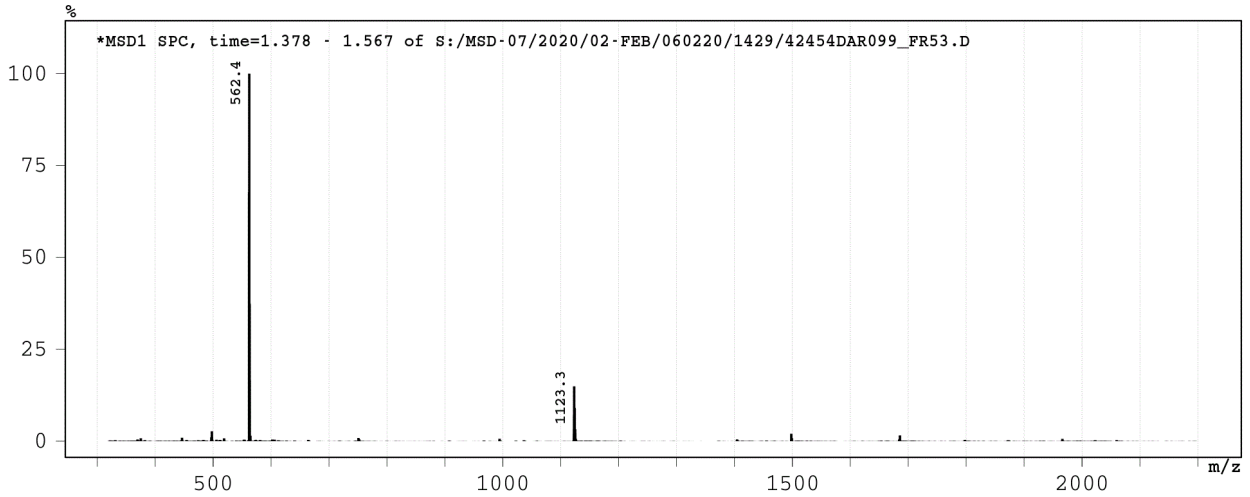

Signal 1: DAD1 A, Sig=220,4 Ref=off

| Peak # | RT [min] | Width [min] | Area   | Area % |
|--------|----------|-------------|--------|--------|
| 1      | 1.337    | 1.00        | 41.5   | 0.7    |
| 2      | 1.409    | 0.22        | 5869.5 | 96.9   |
| 3      | 1.557    | 3.64        | 148.9  | 2.5    |

Data File : S:/MSD-07/2020/02-FEB/050220/1428/42454DAR100\_FR8->  
Injection Date : 05-Feb-20, 18:59:00  
Sample Name : 42454DAR100\_FR80-81  
Remarks : Baseline corrected  
Acq. Method : D:/METHODS/5-95-6M.M  
column used : Je\_559  
Analysis Method : C:/CHEM32/1/METHODS/JPT-LCMS.M



Sample Info : 42454\_100-Dr. Martine Darwish H-KMSSNAFFV-OH

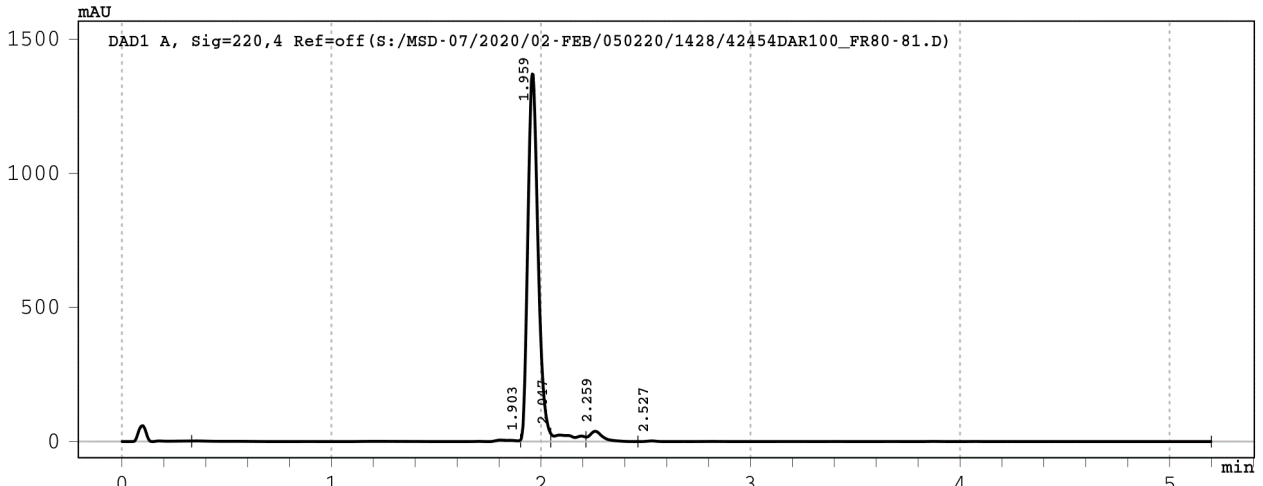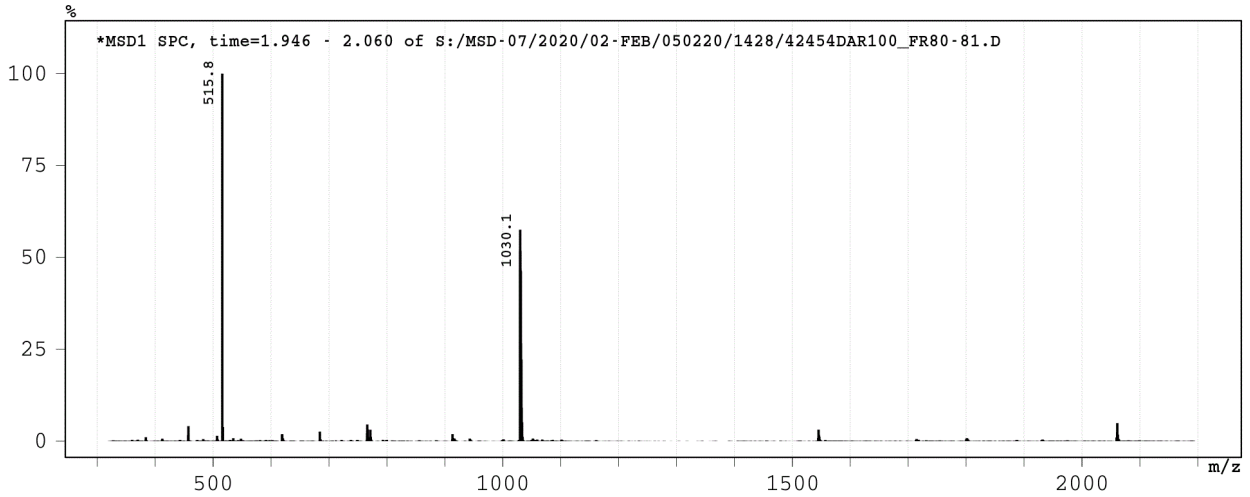

Signal 1: DAD1 A, Sig=220,4 Ref=off

| Peak # | RT [min] | Width [min] | Area   | Area % |
|--------|----------|-------------|--------|--------|
| 1      | 1.903    | 1.57        | 65.5   | 1.3    |
| 2      | 1.959    | 0.14        | 4650.2 | 91.0   |
| 3      | 2.047    | 0.17        | 208.5  | 4.1    |
| 4      | 2.259    | 0.25        | 170.0  | 3.3    |
| 5      | 2.527    | 2.74        | 13.7   | 0.3    |

Data File : S:/MSD-07/2020/02-FEB/060220/1429/42454DAR101\_FR6 ->



Injection Date : 06-Feb-20, 16:41:34  
Sample Name : 42454DAR101\_FR60  
Remarks : Baseline corrected  
Acq. Method : D:/METHODS/5-95-6M.M  
column used : Je\_559  
Analysis Method : C:/CHEM32/1/METHODS/JPT-LCMS.M

Sample Info : 42454\_101-Dr. Martine Darwish H-SYVVKLRGL-OH

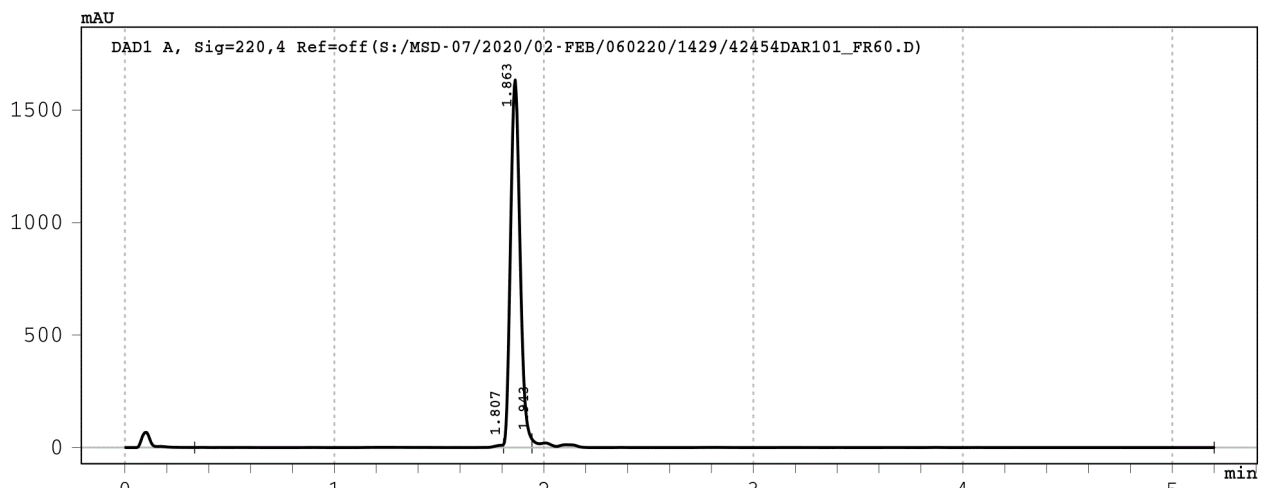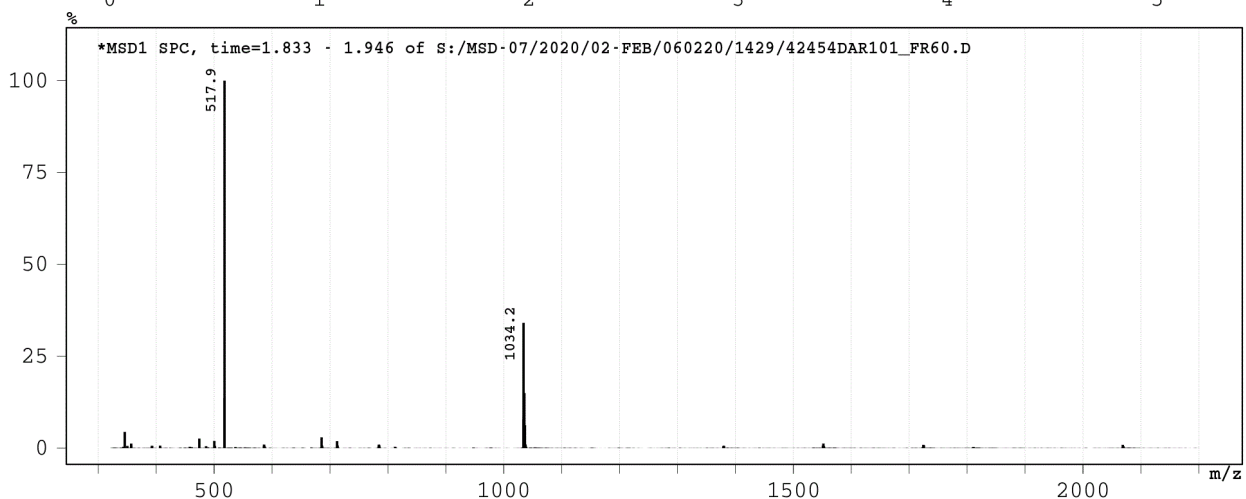

Signal 1: DAD1 A, Sig=220,4 Ref=off

| Peak # | RT [min] | Width [min] | Area   | Area % |
|--------|----------|-------------|--------|--------|
| 1      | 1.807    | 1.47        | 50.5   | 0.9    |
| 2      | 1.863    | 0.14        | 5174.5 | 95.4   |
| 3      | 1.943    | 3.26        | 200.0  | 3.7    |

Data File : S:/MSD-07/2020/02-FEB/060220/1429/42454DAR102\_FR6->



Injection Date : 06-Feb-20, 16:49:58  
Sample Name : 42454DAR102\_FR69-71  
Remarks : Baseline corrected  
Acq. Method : D:/METHODS/5-95-6M.M  
column used : Je\_559  
Analysis Method : C:/CHEM32/1/METHODS/JPT-LCMS.M

Sample Info : 42454\_102-Dr. Martine Darwish H-IHPKAFPL-OH

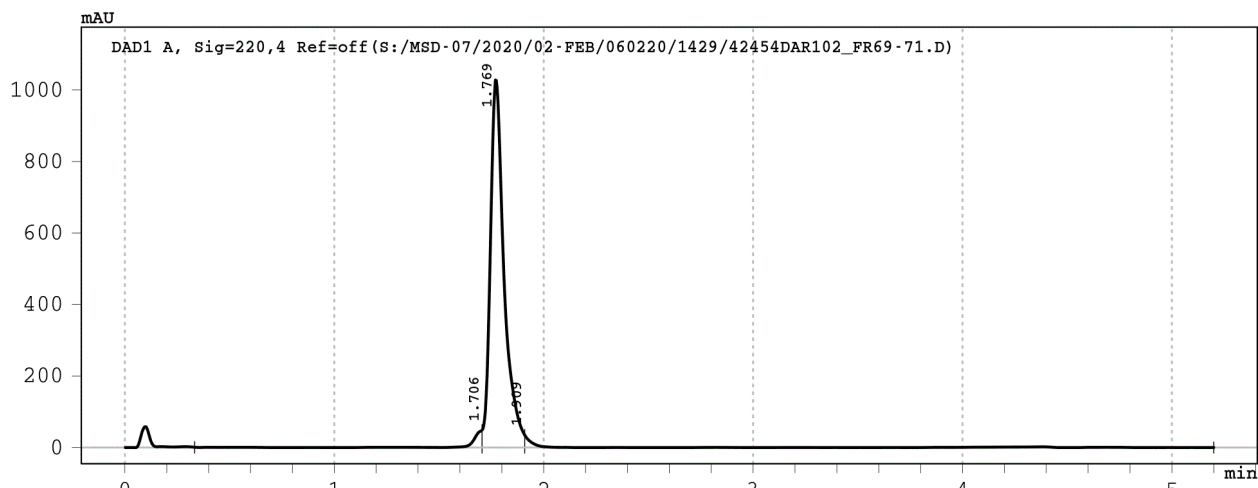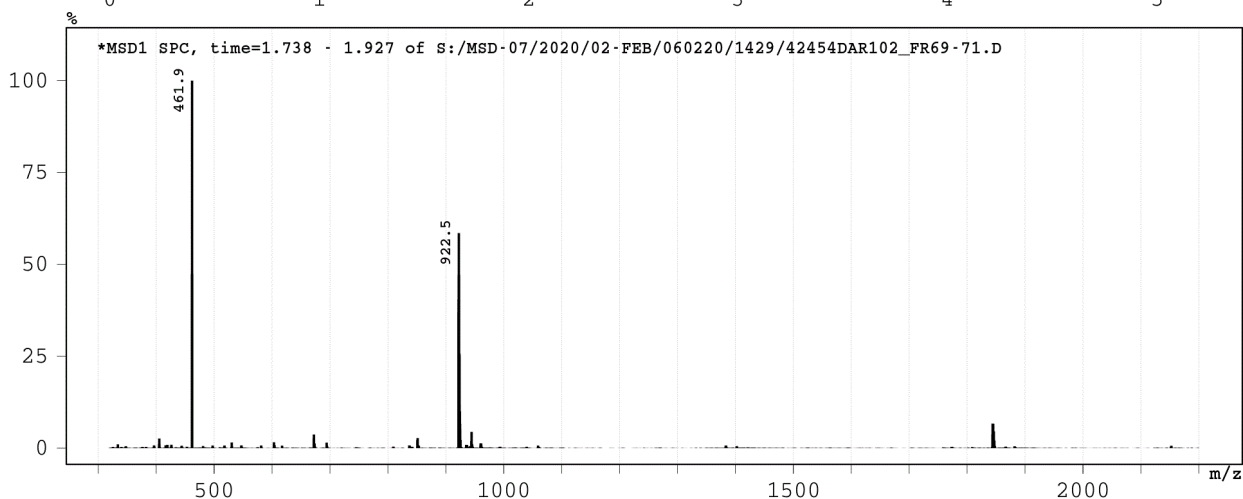

Signal 1: DAD1 A, Sig=220,4 Ref=off

| Peak # | RT [min] | Width [min] | Area   | Area % |
|--------|----------|-------------|--------|--------|
| 1      | 1.706    | 1.37        | 144.3  | 2.9    |
| 2      | 1.769    | 0.20        | 4684.6 | 94.4   |
| 3      | 1.909    | 3.29        | 131.4  | 2.6    |

Data File : S:/MSD-07/2020/02-FEB/070220/1430/42454DAR103\_FR4->  
 Injection Date : 07-Feb-20, 15:52:26  
 Sample Name : 42454DAR103\_FR4-6  
 Remarks : Baseline corrected  
 Acq. Method : D:/METHODS/5-95-6M.M  
 column used : Je\_559  
 Analysis Method : C:/CHEM32/1/METHODS/JPT-LCMS.M



Sample Info : 42454\_103-Dr. Martine Darwish H-IHPKAPPF-OH

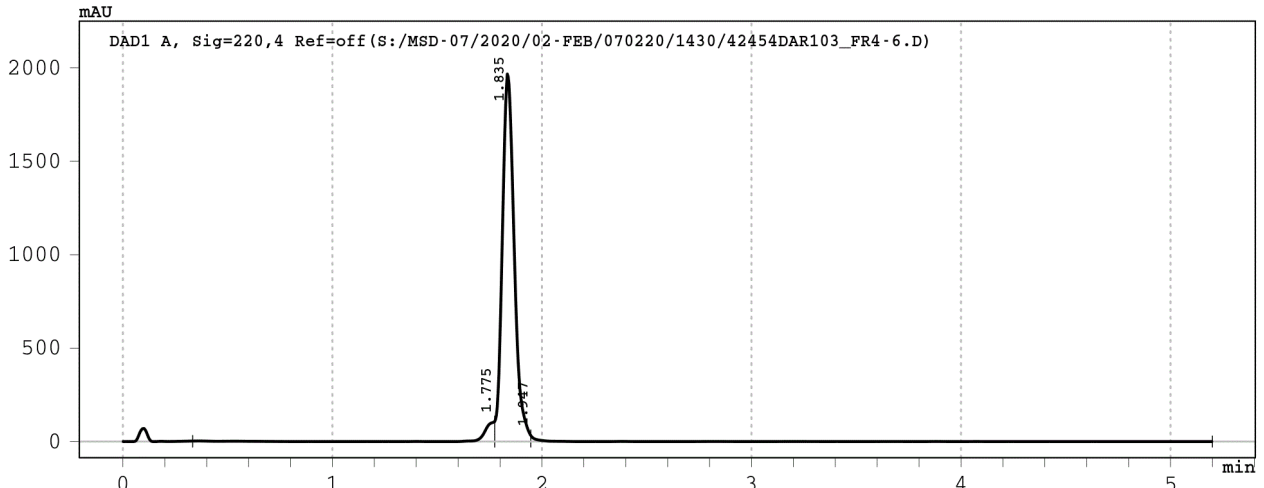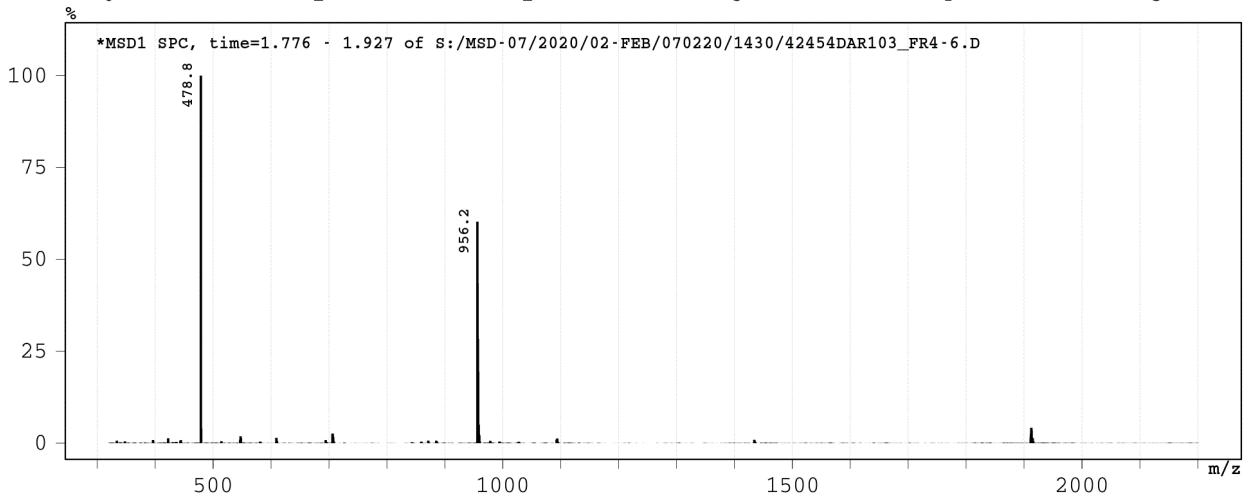

Signal 1: DAD1 A, Sig=220,4 Ref=off

| Peak # | RT [min] | Width [min] | Area   | Area % |
|--------|----------|-------------|--------|--------|
| 1      | 1.775    | 1.44        | 364.1  | 4.4    |
| 2      | 1.835    | 0.17        | 7770.7 | 94.7   |
| 3      | 1.947    | 3.25        | 70.9   | 0.9    |

Data File : S:/MSD-07/2020/02-FEB/070220/1430/42454DAR104\_FR1->  
 Injection Date : 07-Feb-20, 16:00:47  
 Sample Name : 42454DAR104\_FR19-21  
 Remarks : Baseline corrected  
 Acq. Method : D:/METHODS/5-95-6M.M  
 column used : Je\_559  
 Analysis Method : C:/CHEM32/1/METHODS/JPT-LCMS.M



Sample Info : 42454\_104-Dr. Martine Darwish H-SLLAWRAL-OH

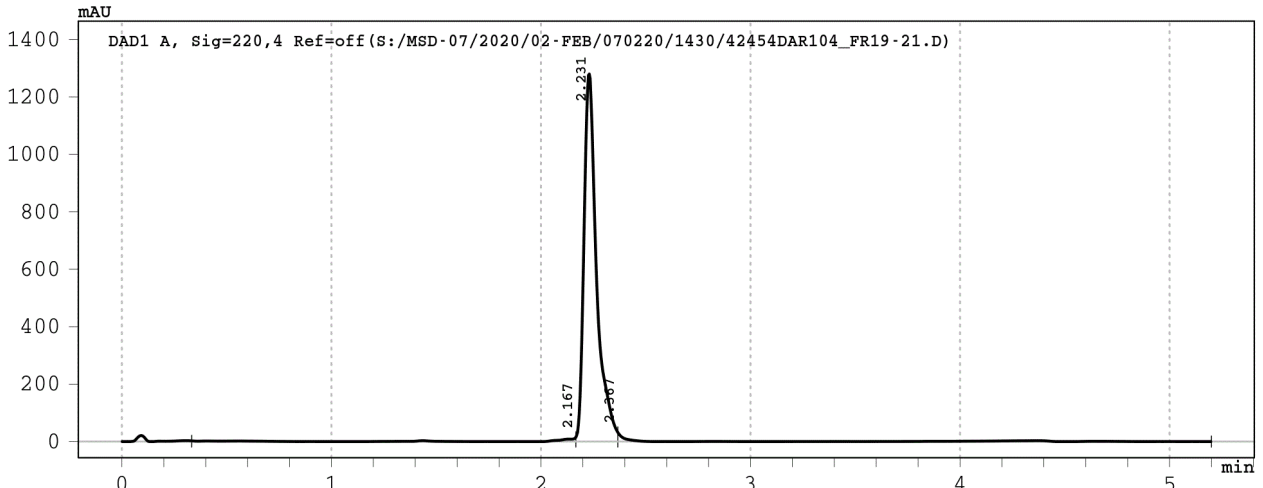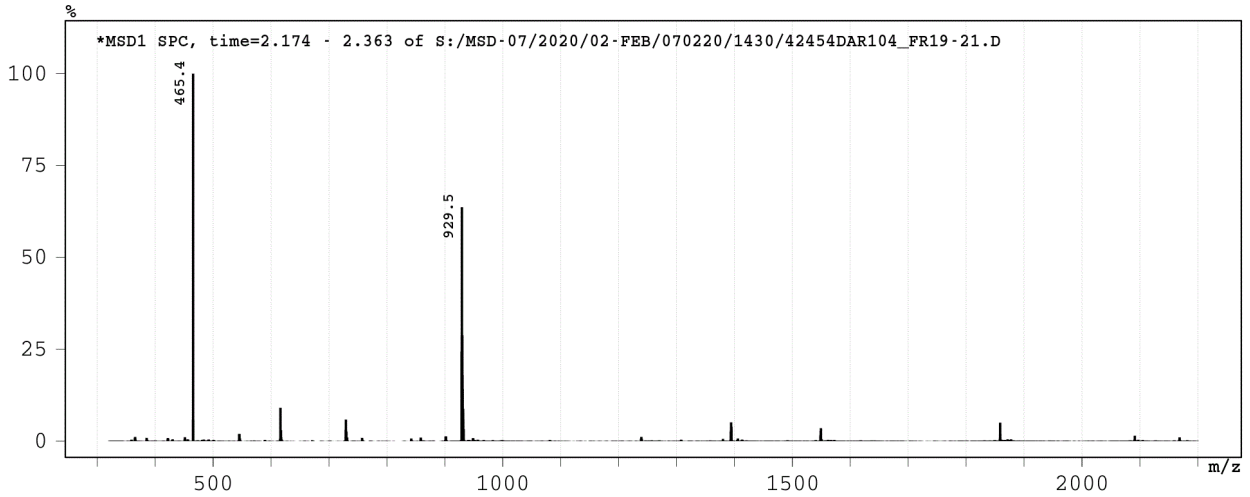

Signal 1: DAD1 A, Sig=220,4 Ref=off

| Peak # | RT [min] | Width [min] | Area   | Area % |
|--------|----------|-------------|--------|--------|
| 1      | 2.167    | 1.83        | 108.6  | 1.9    |
| 2      | 2.231    | 0.20        | 5364.8 | 95.5   |
| 3      | 2.367    | 2.83        | 143.4  | 2.6    |

Data File : S:/MSD-07/2020/02-FEB/070220/1430/42454DAR105\_FR4->



Injection Date : 07-Feb-20, 16:09:09  
Sample Name : 42454DAR105\_FR43  
Remarks : Baseline corrected  
Acq. Method : D:/METHODS/5-95-6M.M  
column used : Je\_559  
Analysis Method : C:/CHEM32/1/METHODS/JPT-LCMS.M

Sample Info : 42454\_105-Dr. Martine Darwish H-AWLSKVSRL-OH

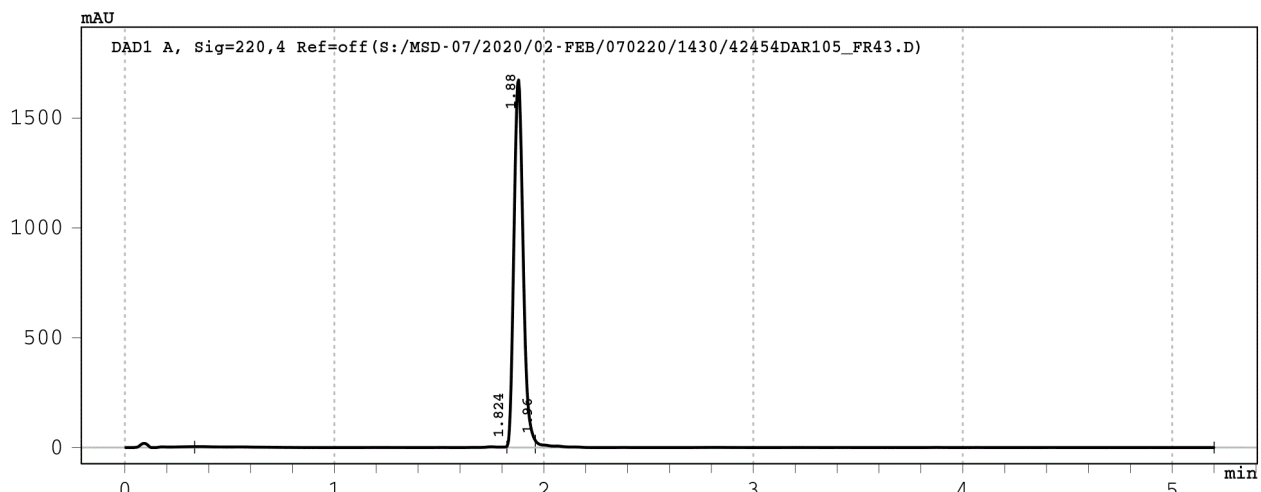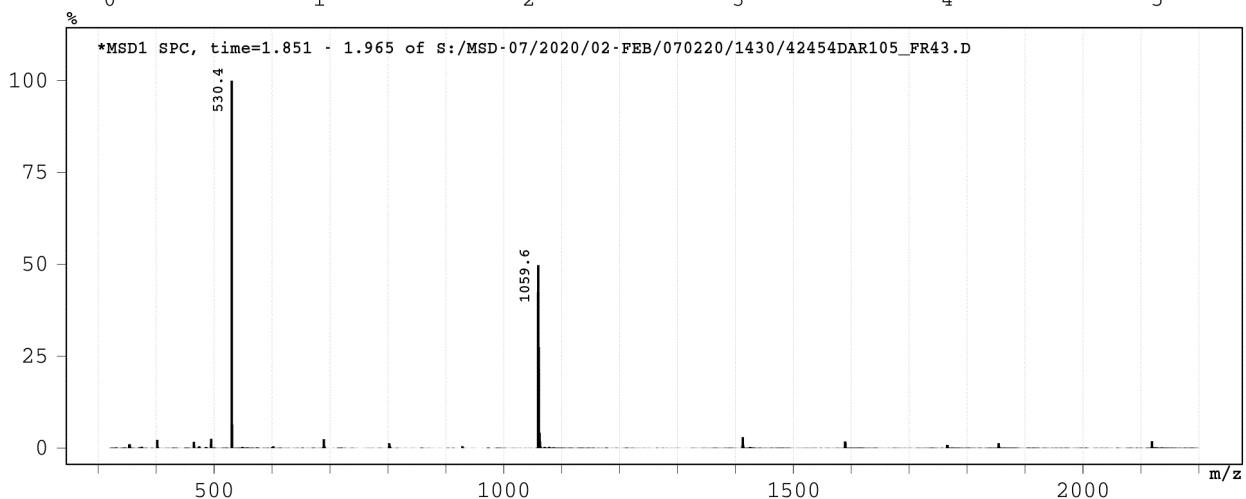

Signal 1: DAD1 A, Sig=220,4 Ref=off

| Peak # | RT [min] | Width [min] | Area   | Area % |
|--------|----------|-------------|--------|--------|
| 1      | 1.824    | 1.49        | 84.1   | 1.6    |
| 2      | 1.880    | 0.14        | 5111.6 | 96.4   |
| 3      | 1.960    | 3.24        | 107.7  | 2.0    |

Data File : S:/MSD-07/2020/02-FEB/070220/1430/42454DAR106\_FR6->  
 Injection Date : 07-Feb-20, 16:17:31  
 Sample Name : 42454DAR106\_FR60  
 Remarks : Baseline corrected  
 Acq. Method : D:/METHODS/5-95-6M.M  
 column used : Je\_559  
 Analysis Method : C:/CHEM32/1/METHODS/JPT-LCMS.M



Sample Info : 42454\_106-Dr. Martine Darwish H-SSLKSYVQL-OH

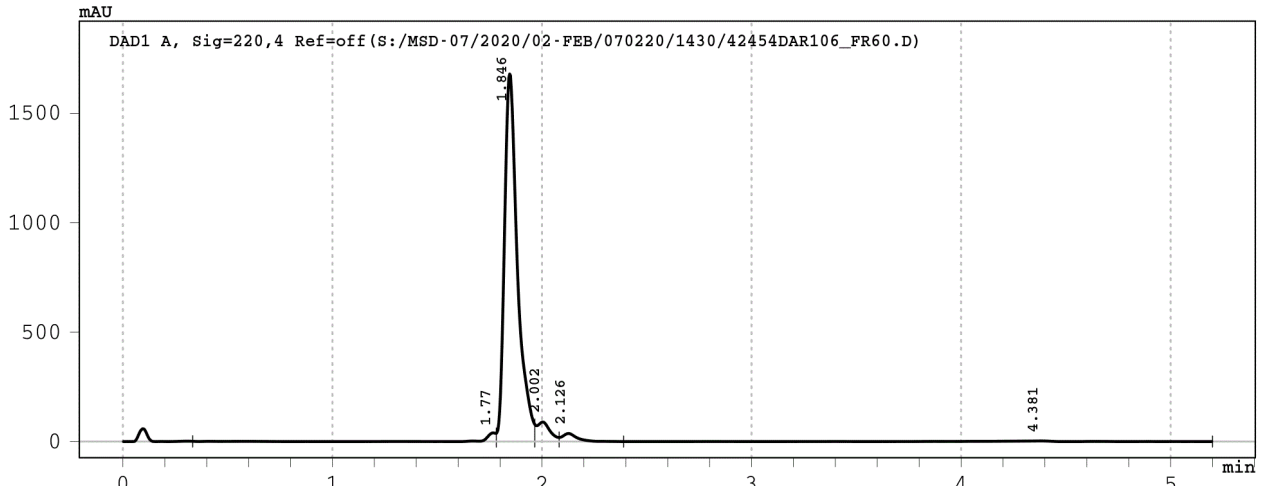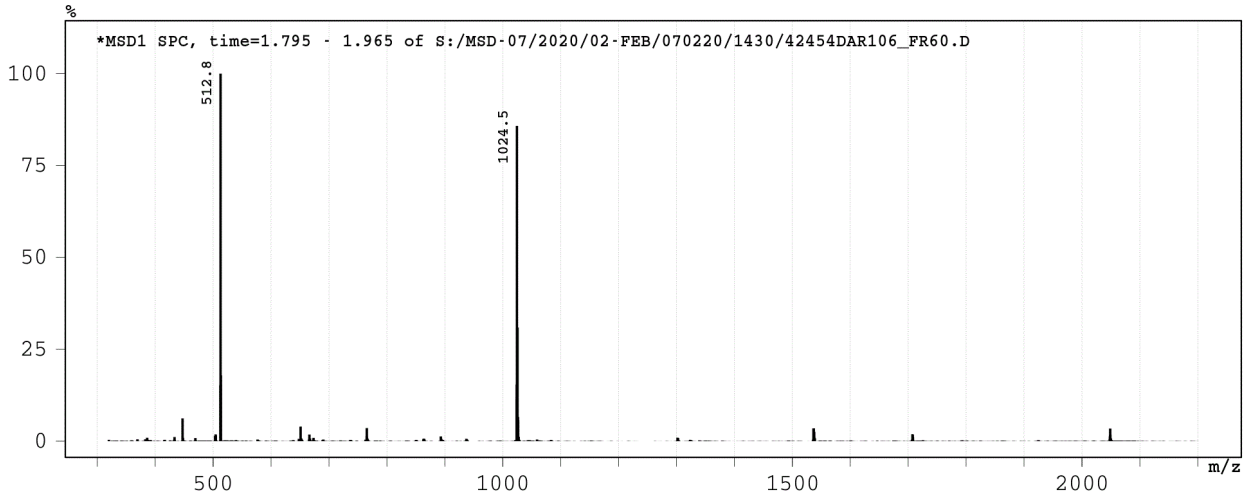

Signal 1: DAD1 A, Sig=220,4 Ref=off

| Peak # | RT [min] | Width [min] | Area   | Area % |
|--------|----------|-------------|--------|--------|
| 1      | 1.770    | 1.45        | 132.4  | 1.6    |
| 2      | 1.846    | 0.18        | 7261.2 | 90.3   |
| 3      | 2.002    | 0.12        | 407.1  | 5.1    |
| 4      | 2.126    | 0.31        | 182.7  | 2.3    |
| 5      | 4.381    | 2.81        | 61.9   | 0.8    |



Data File : S:/MSD-07/2020/02-FEB/070220/1430/42454DAR107\_FR7->  
 Injection Date : 07-Feb-20, 16:25:56  
 Sample Name : 42454DAR107\_FR72-73  
 Remarks : Baseline corrected  
 Acq. Method : D:/METHODS/5-95-6M.M  
 column used : Je\_559  
 Analysis Method : C:/CHEM32/1/METHODS/JPT-LCMS.M



Sample Info : 42454\_107-Dr. Martine Darwish H-VNGLLYVSV-OH

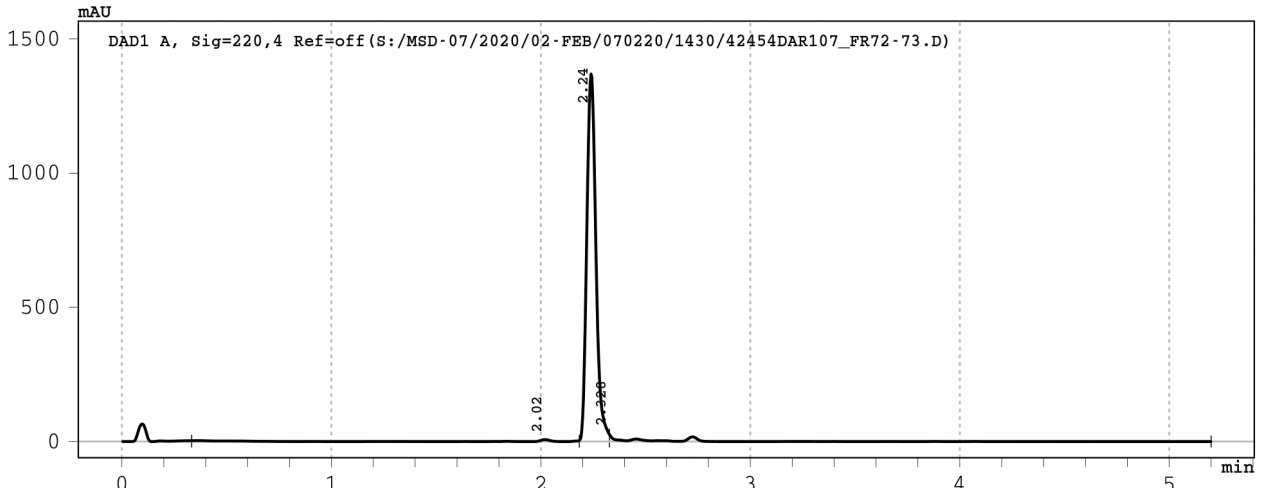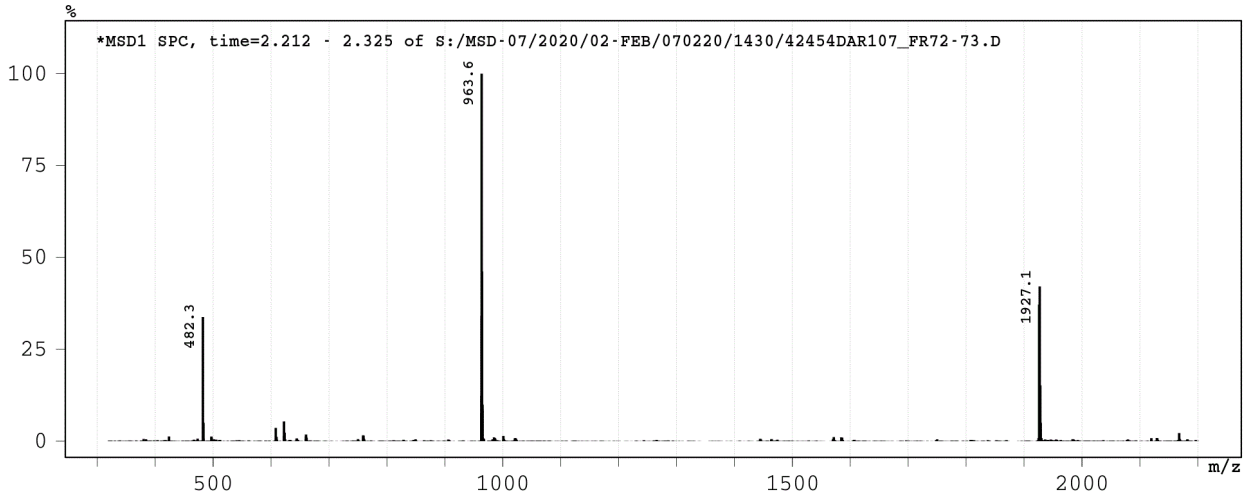

Signal 1: DAD1 A, Sig=220,4 Ref=off

| Peak # | RT [min] | Width [min] | Area   | Area % |
|--------|----------|-------------|--------|--------|
| 1      | 2.020    | 1.85        | 78.8   | 1.8    |
| 2      | 2.240    | 0.14        | 4157.4 | 94.6   |
| 3      | 2.328    | 2.87        | 160.0  | 3.6    |

Data File : S:/MSD-07/2020/02-FEB/050220/1428/42454DAR108\_FR1->



Injection Date : 05-Feb-20, 19:07:23  
Sample Name : 42454DAR108\_FR17-18  
Remarks : Baseline corrected  
Acq. Method : D:/METHODS/5-95-6M.M  
column used : Je\_559  
Analysis Method : C:/CHEM32/1/METHODS/JPT-LCMS.M

Sample Info : 42454\_108-Dr. Martine Darwish H-RVYLMPLL-OH

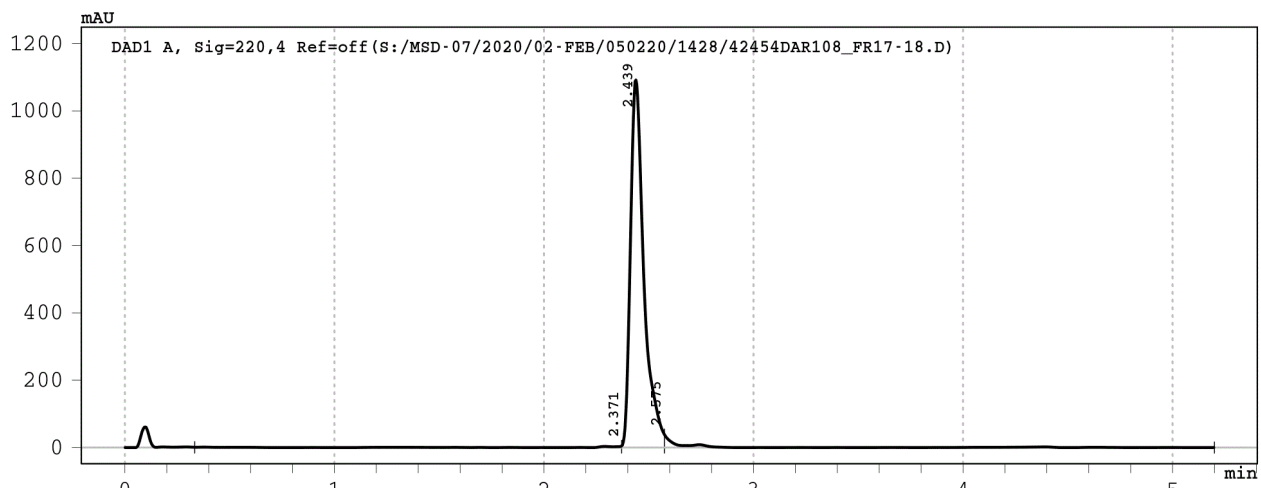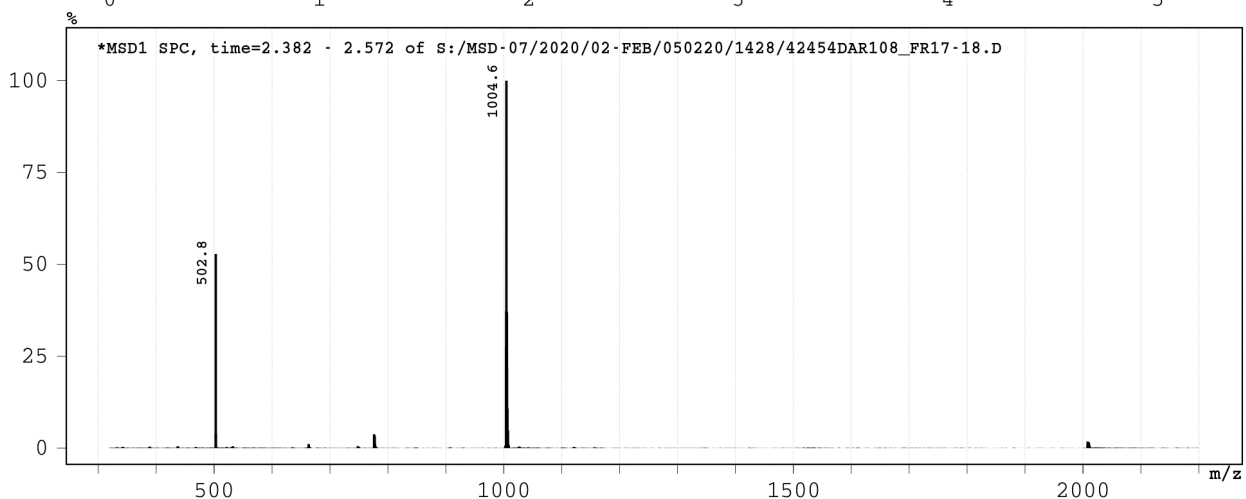

Signal 1: DAD1 A, Sig=220,4 Ref=off

| Peak # | RT [min] | Width [min] | Area   | Area % |
|--------|----------|-------------|--------|--------|
| 1      | 2.371    | 2.04        | 54.0   | 1.1    |
| 2      | 2.439    | 0.20        | 4875.2 | 95.5   |
| 3      | 2.575    | 2.63        | 176.4  | 3.5    |

Data File : S:/MSD-07/2020/02-FEB/070220/1430/42454DAR109\_FR8->



Injection Date : 07-Feb-20, 16:34:18  
Sample Name : 42454DAR109\_FR82  
Remarks : Baseline corrected  
Acq. Method : D:/METHODS/5-95-6M.M  
column used : Je\_559  
Analysis Method : C:/CHEM32/1/METHODS/JPT-LCMS.M

Sample Info : 42454\_109-Dr. Martine Darwish H-AALLNSAVL-OH

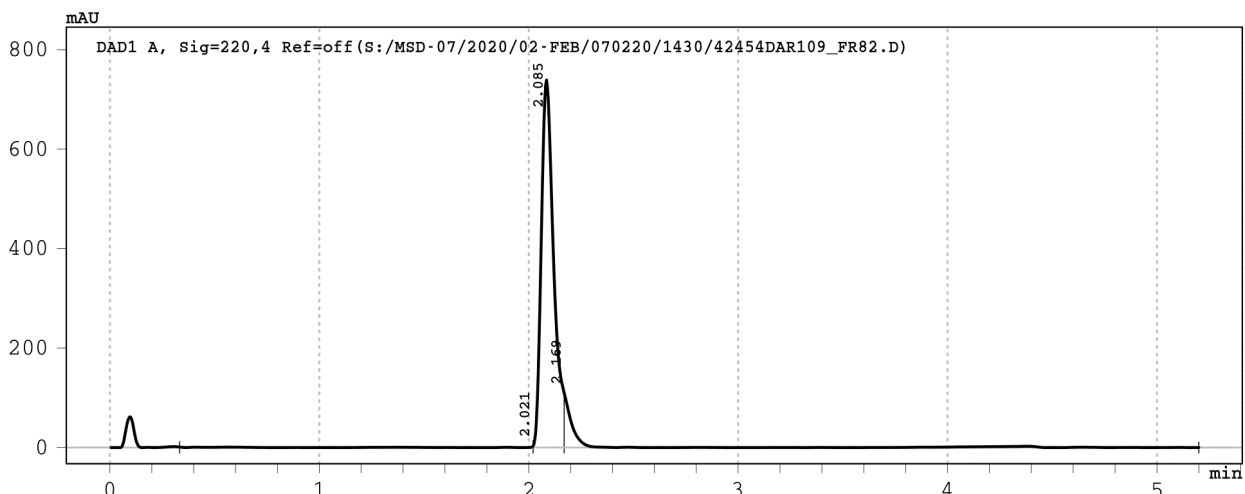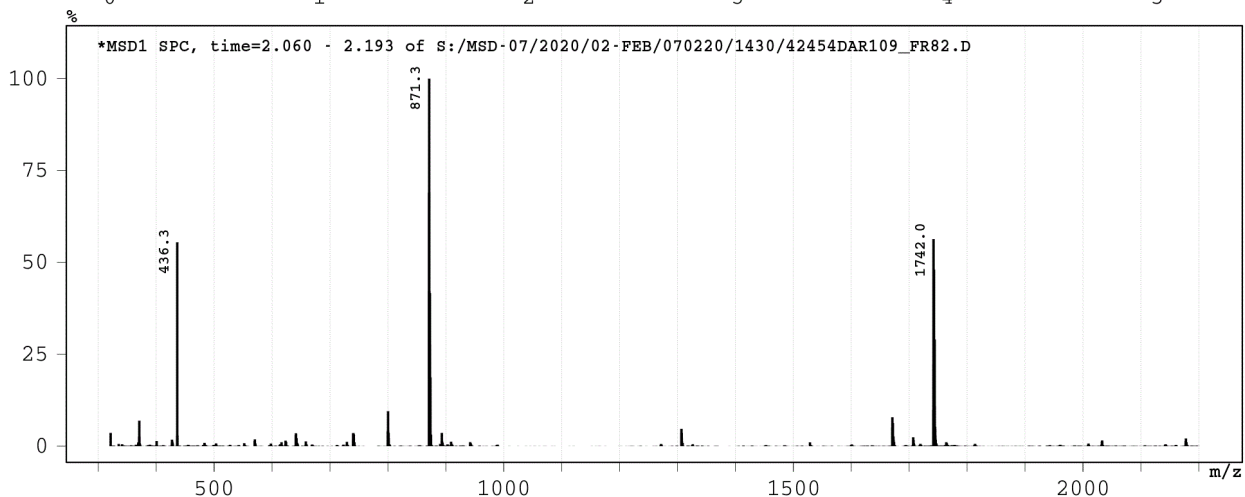

Signal 1: DAD1 A, Sig=220,4 Ref=off

| Peak # | RT [min] | Width [min] | Area   | Area % |
|--------|----------|-------------|--------|--------|
| 1      | 2.021    | 1.69        | 25.5   | 0.8    |
| 2      | 2.085    | 0.15        | 3029.1 | 89.5   |
| 3      | 2.169    | 3.03        | 331.0  | 9.8    |

Data File : S:/MSD-07/2020/02-FEB/070220/1430/42454DAR110\_FR2 ->



Injection Date : 07-Feb-20, 16:42:43  
Sample Name : 42454DAR110\_FR2  
Remarks : Baseline corrected  
Acq. Method : D:/METHODS/5-95-6M.M  
column used : Je\_559  
Analysis Method : C:/CHEM32/1/METHODS/JPT-LCMS.M

Sample Info : 42454\_110-Dr. Martine Darwish H-VQINNPVTFLL-OH

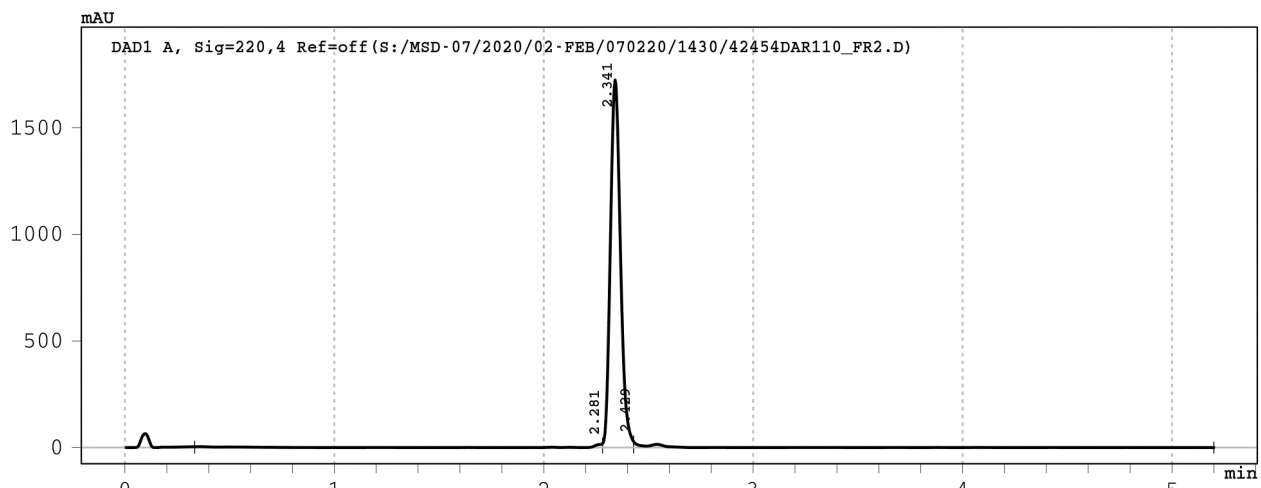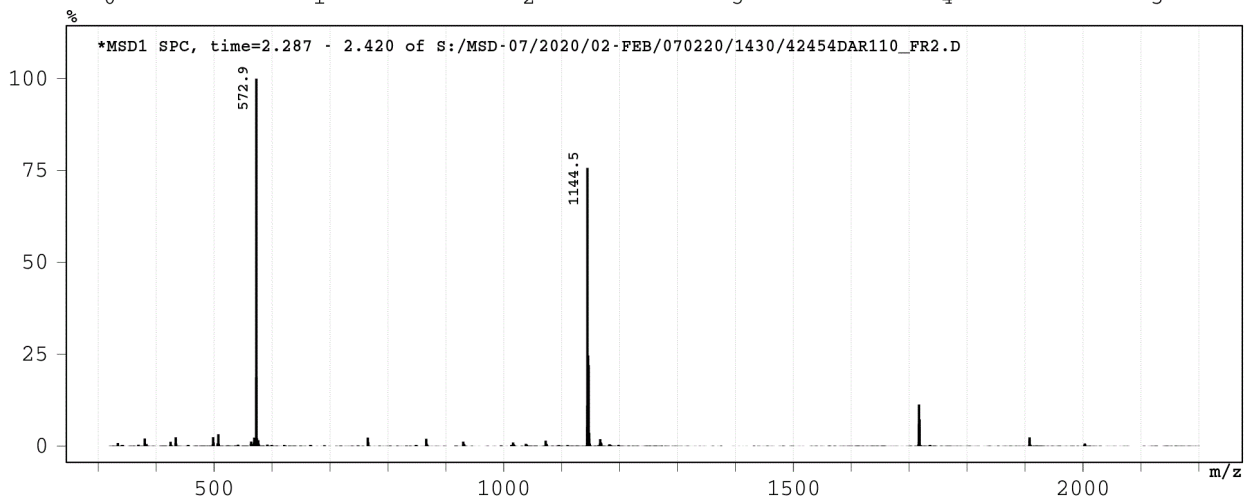

Signal 1: DAD1 A, Sig=220,4 Ref=off

| Peak # | RT [min] | Width [min] | Area   | Area % |
|--------|----------|-------------|--------|--------|
| 1      | 2.281    | 1.95        | 100.8  | 1.7    |
| 2      | 2.341    | 0.15        | 5749.2 | 96.2   |
| 3      | 2.429    | 2.77        | 128.3  | 2.1    |

Data File : S:/MSD-07/2020/02-FEB/070220/1430/42454DAR112\_FR7->



Injection Date : 07-Feb-20, 16:51:05  
Sample Name : 42454DAR112\_FR7-9  
Remarks : Baseline corrected  
Acq. Method : D:/METHODS/5-95-6M.M  
column used : Je\_559  
Analysis Method : C:/CHEM32/1/METHODS/JPT-LCMS.M

Sample Info : 42454\_112-Dr. Martine Darwish H-SQESNGVYV-OH

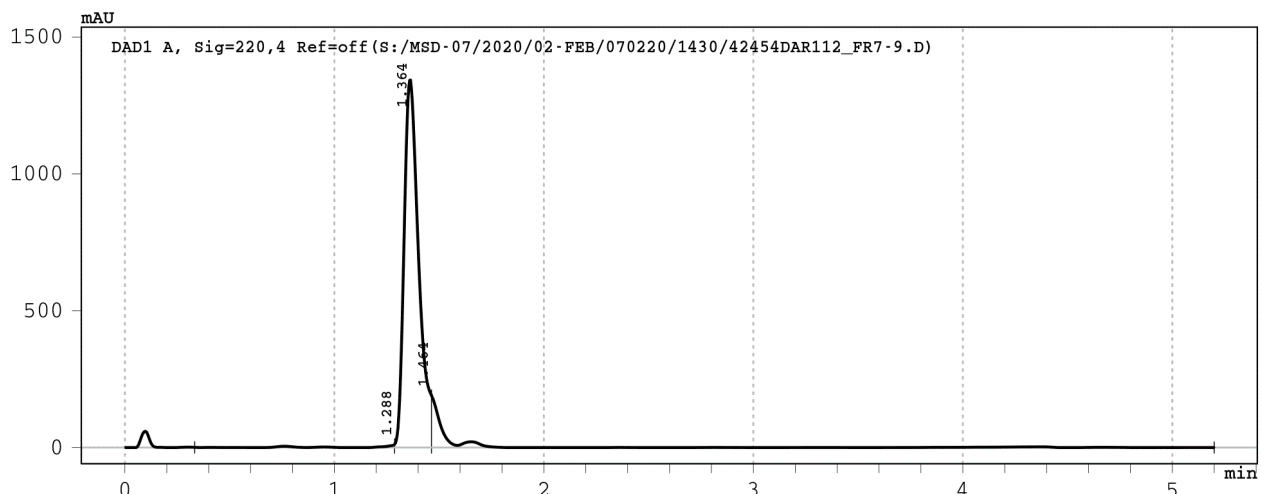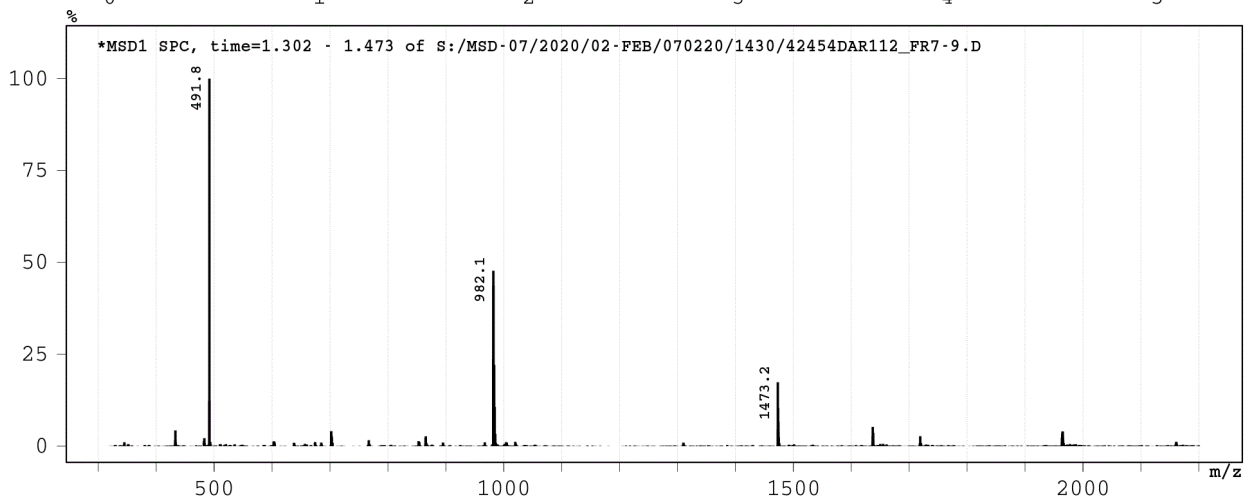

Signal 1: DAD1 A, Sig=220,4 Ref=off

| Peak # | RT [min] | Width [min] | Area   | Area % |
|--------|----------|-------------|--------|--------|
| 1      | 1.288    | 0.95        | 64.8   | 0.9    |
| 2      | 1.364    | 0.18        | 6496.3 | 89.4   |
| 3      | 1.464    | 3.74        | 709.3  | 9.8    |

Data File : S:/MSD-07/2020/02-FEB/050220/1428/42454DAR113\_FR3->  
 Injection Date : 05-Feb-20, 19:15:47  
 Sample Name : 42454DAR113\_FR36-37  
 Remarks : Baseline corrected  
 Acq. Method : D:/METHODS/5-95-6M.M  
 column used : Je\_559  
 Analysis Method : C:/CHEM32/1/METHODS/JPT-LCMS.M



Sample Info : 42454\_113-Dr. Martine Darwish H-IVYLYVVC-OH

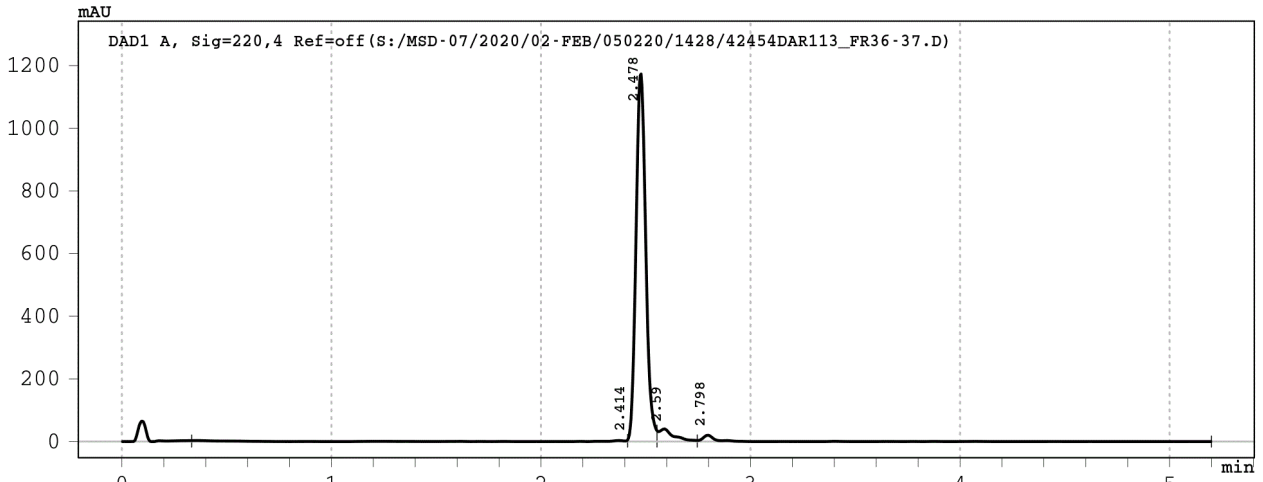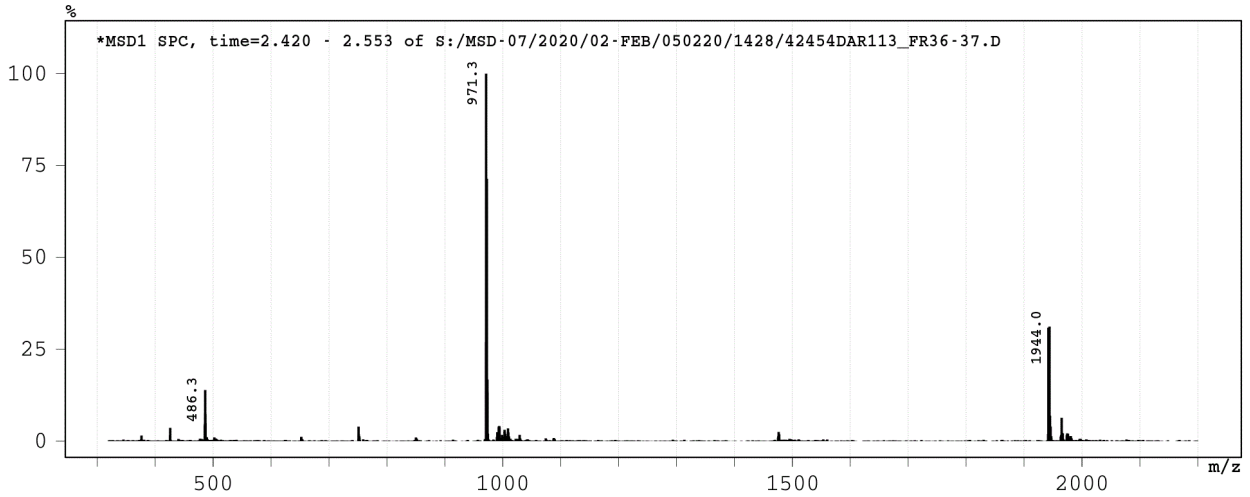

Signal 1: DAD1 A, Sig=220,4 Ref=off

| Peak # | RT [min] | Width [min] | Area   | Area % |
|--------|----------|-------------|--------|--------|
| 1      | 2.414    | 2.08        | 69.8   | 1.7    |
| 2      | 2.478    | 0.14        | 3806.3 | 91.2   |
| 3      | 2.590    | 0.19        | 207.4  | 5.0    |
| 4      | 2.798    | 2.45        | 89.5   | 2.1    |

Data File : S:/MSD-07/2020/02-FEB/070220/1430/42454DAR114\_FR2->



Injection Date : 07-Feb-20, 16:59:28  
Sample Name : 42454DAR114\_FR20-22  
Remarks : Baseline corrected  
Acq. Method : D:/METHODS/5-95-6M.M  
column used : Je\_559  
Analysis Method : C:/CHEM32/1/METHODS/JPT-LCMS.M

Sample Info : 42454\_114-Dr. Martine Darwish H-AFFEAASI-OH

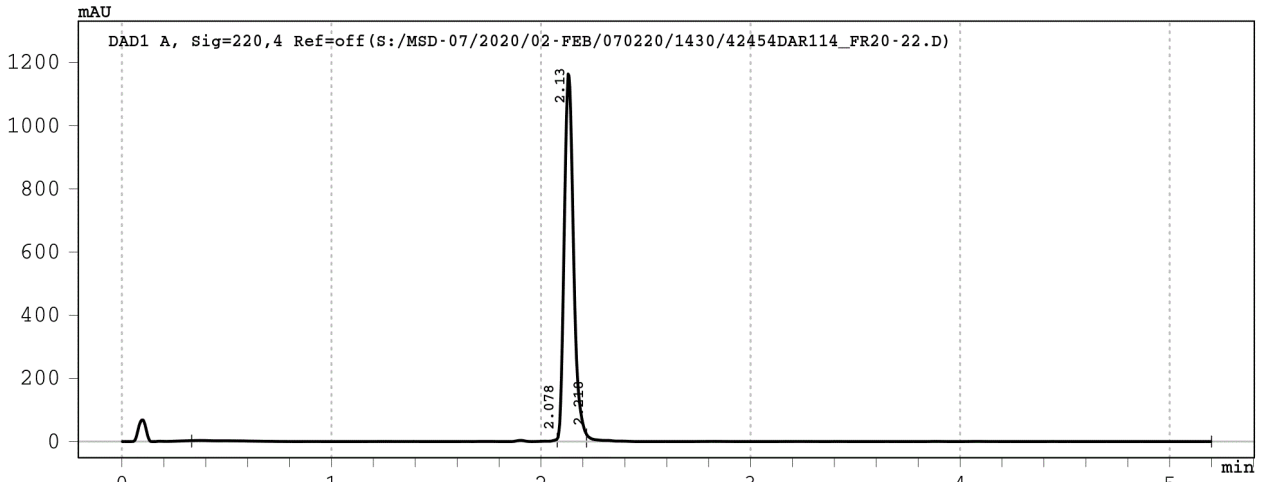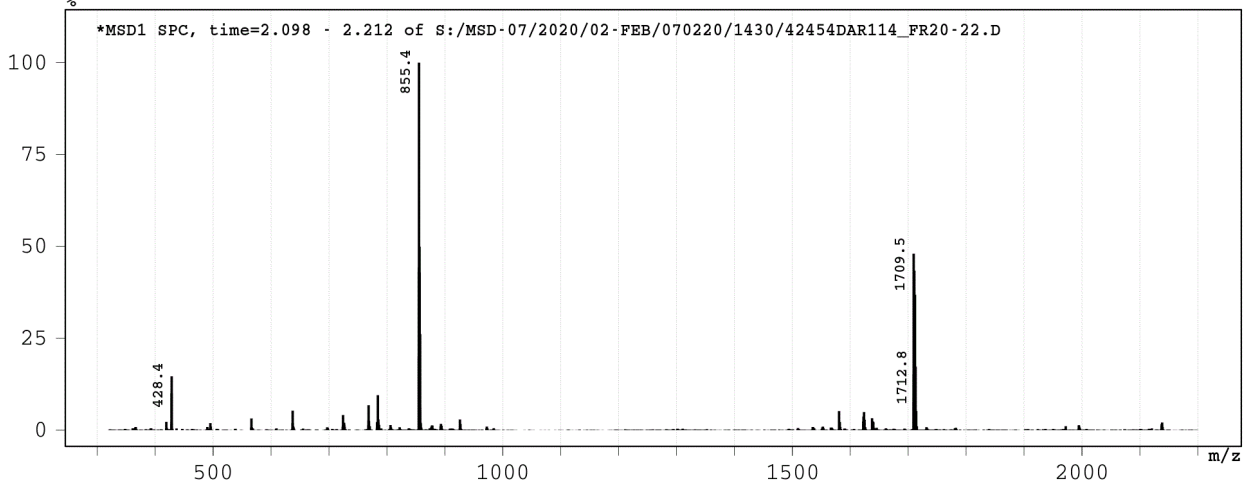

Signal 1: DAD1 A, Sig=220,4 Ref=off

| Peak # | RT [min] | Width [min] | Area   | Area % |
|--------|----------|-------------|--------|--------|
| 1      | 2.078    | 1.74        | 73.9   | 2.0    |
| 2      | 2.130    | 0.14        | 3617.5 | 96.4   |
| 3      | 2.218    | 2.98        | 63.1   | 1.7    |

Data File : S:/MSD-07/2020/02-FEB/140220/1435/42454DAR115\_FR1->  
 Injection Date : 14-Feb-20, 23:53:14  
 Sample Name : 42454DAR115\_FR18-19  
 Remarks : Baseline corrected  
 Acq. Method : D:/METHODS/5-95-6M.M  
 column used : Je\_559  
 Analysis Method : C:/CHEM32/1/METHODS/JPT-LCMS.M



Sample Info : 42454\_115-Dr. Martine Darwish H-IQIAKEMAL-OH

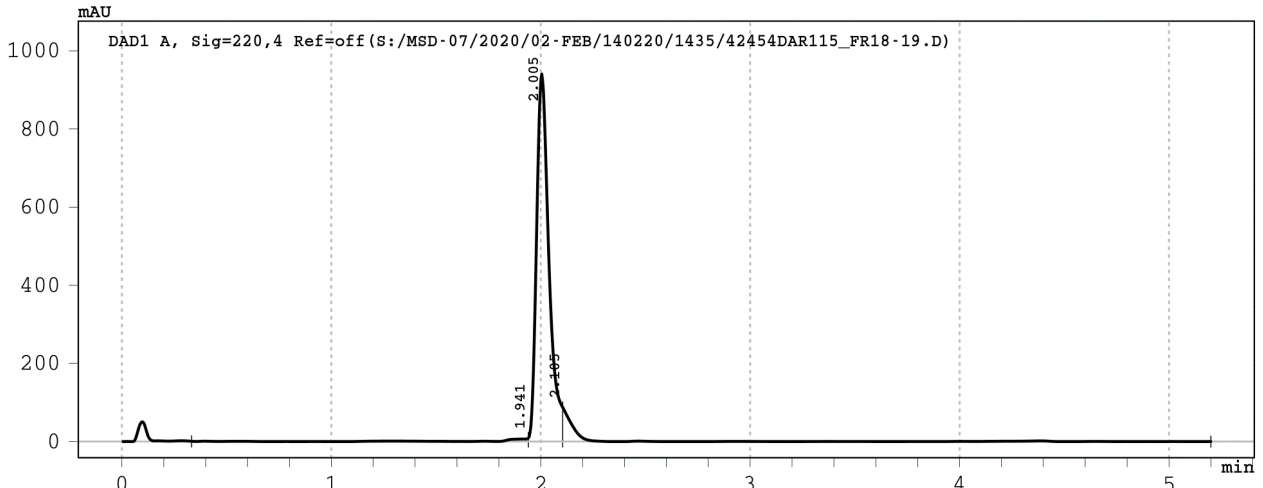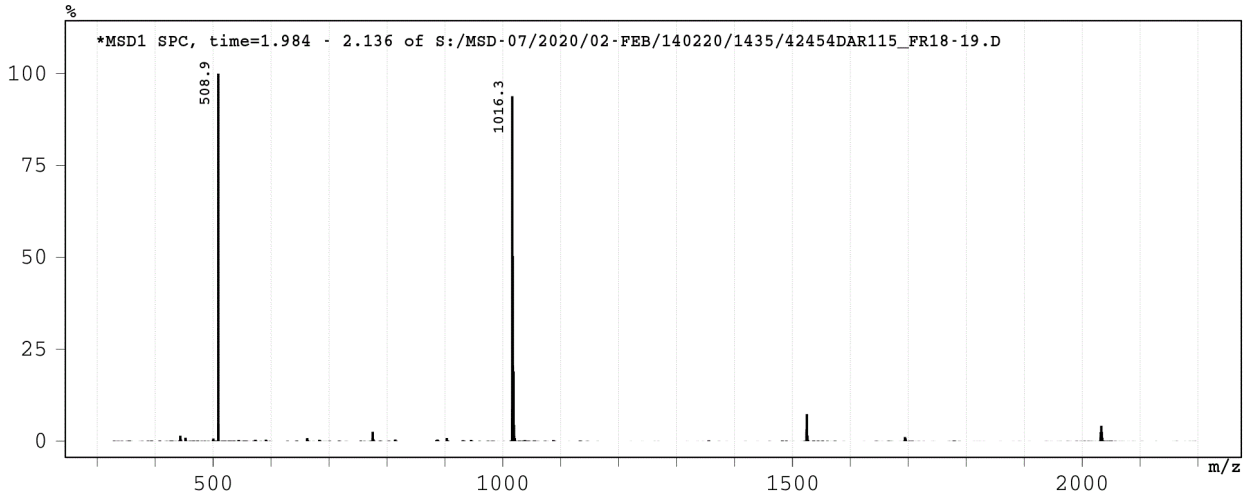

Signal 1: DAD1 A, Sig=220,4 Ref=off

| Peak # | RT [min] | Width [min] | Area   | Area % |
|--------|----------|-------------|--------|--------|
| 1      | 1.941    | 1.61        | 79.3   | 1.9    |
| 2      | 2.005    | 0.16        | 3857.2 | 91.1   |
| 3      | 2.105    | 3.10        | 298.9  | 7.1    |



Data File : S:/MSD-07/2020/02-FEB/070220/1430/42454DAR116\_FR2->



Injection Date : 07-Feb-20, 17:07:50  
Sample Name : 42454DAR116\_FR25-26  
Remarks : Baseline corrected  
Acq. Method : D:/METHODS/5-95-6M.M  
column used : Je\_559  
Analysis Method : C:/CHEM32/1/METHODS/JPT-LCMS.M

Sample Info : 42454\_116-Dr. Martine Darwish H-ASISTATPV-OH

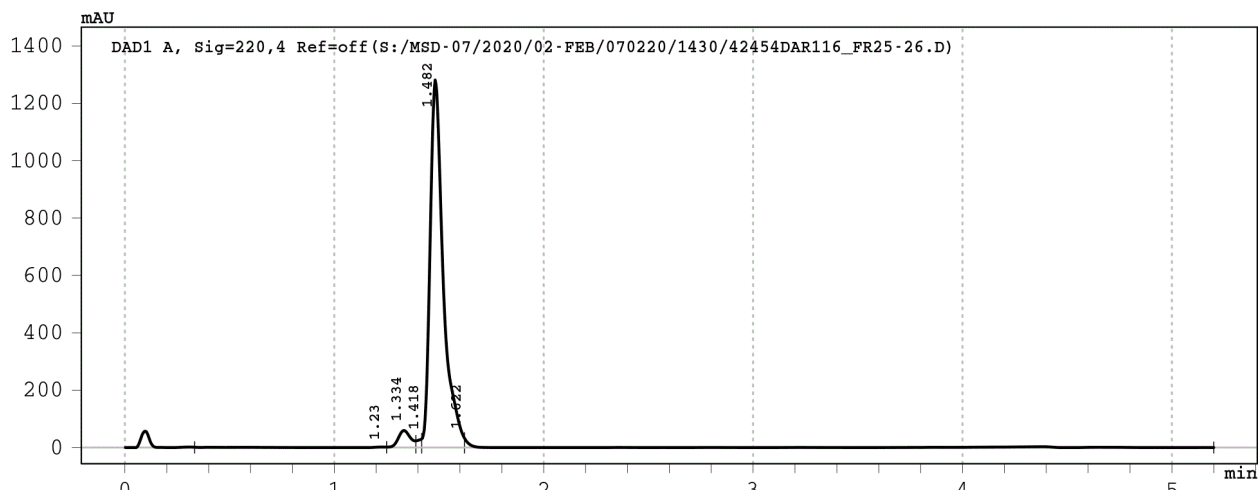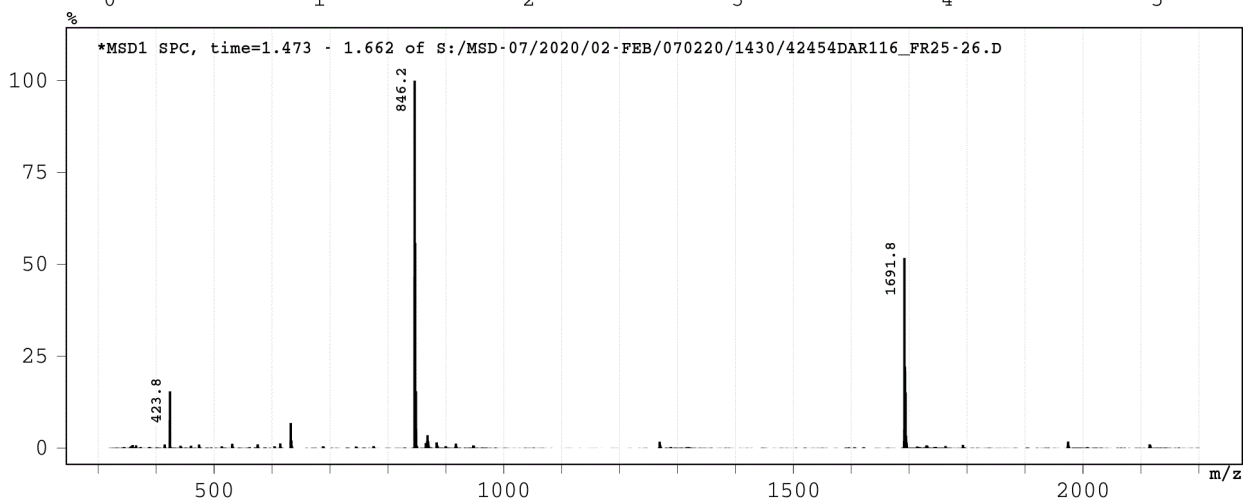

Signal 1: DAD1 A, Sig=220,4 Ref=off

| Peak # | RT [min] | Width [min] | Area   | Area % |
|--------|----------|-------------|--------|--------|
| 1      | 1.230    | 0.92        | 21.4   | 0.4    |
| 2      | 1.334    | 0.14        | 244.1  | 4.1    |
| 3      | 1.418    | 0.03        | 43.8   | 0.7    |
| 4      | 1.482    | 0.20        | 5592.2 | 92.9   |
| 5      | 1.622    | 3.58        | 120.9  | 2.0    |

Data File : S:/MSD-07/2020/02-FEB/050220/1428/42454DAR117\_FR5->  
 Injection Date : 05-Feb-20, 19:24:10  
 Sample Name : 42454DAR117\_FR52  
 Remarks : Baseline corrected  
 Acq. Method : D:/METHODS/5-95-6M.M  
 column used : Je\_559  
 Analysis Method : C:/CHEM32/1/METHODS/JPT-LCMS.M



Sample Info : 42454\_117-Dr. Martine Darwish H-WARCNFNLL-OH

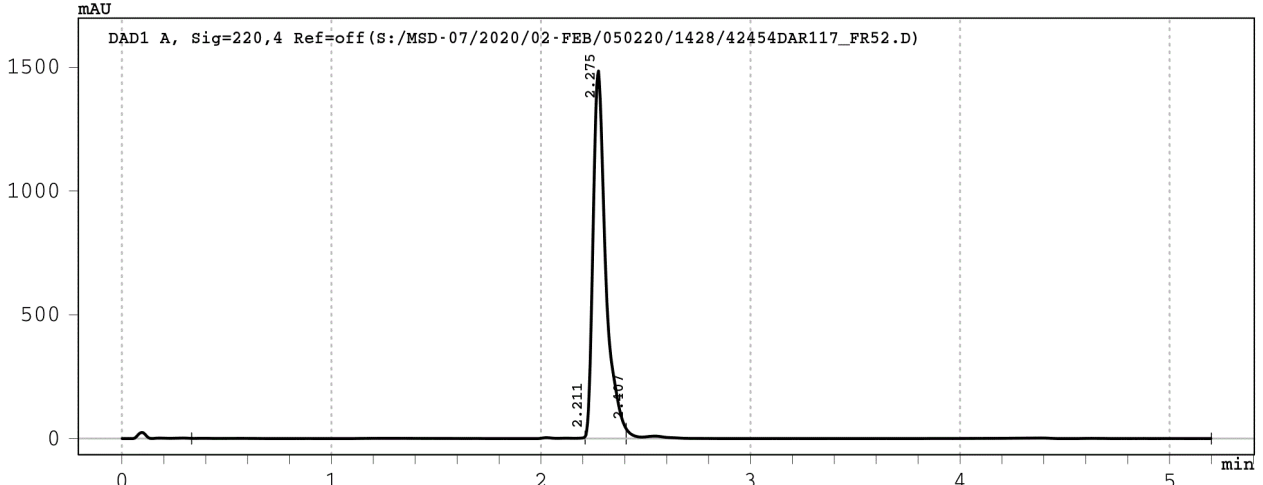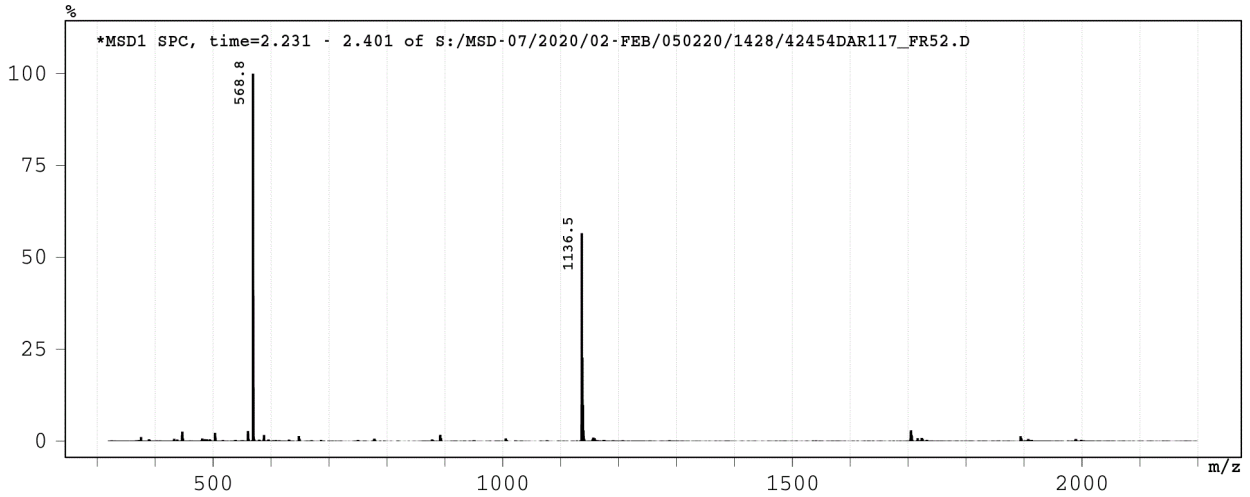

Signal 1: DAD1 A, Sig=220,4 Ref=off

| Peak # | RT [min] | Width [min] | Area   | Area % |
|--------|----------|-------------|--------|--------|
| 1      | 2.211    | 1.88        | 56.2   | 0.9    |
| 2      | 2.275    | 0.20        | 6240.0 | 96.4   |
| 3      | 2.407    | 2.79        | 178.7  | 2.8    |

Data File : S:/MSD-07/2020/02-FEB/140220/1435/42454DAR118\_FR2->  
 Injection Date : 15-Feb-20, 00:01:36  
 Sample Name : 42454DAR118\_FR23-24  
 Remarks : Baseline corrected  
 Acq. Method : D:/METHODS/5-95-6M.M  
 column used : Je\_559  
 Analysis Method : C:/CHEM32/1/METHODS/JPT-LCMS.M



Sample Info : 42454\_118-Dr. Martine Darwish H-CTLQFEAAL-OH

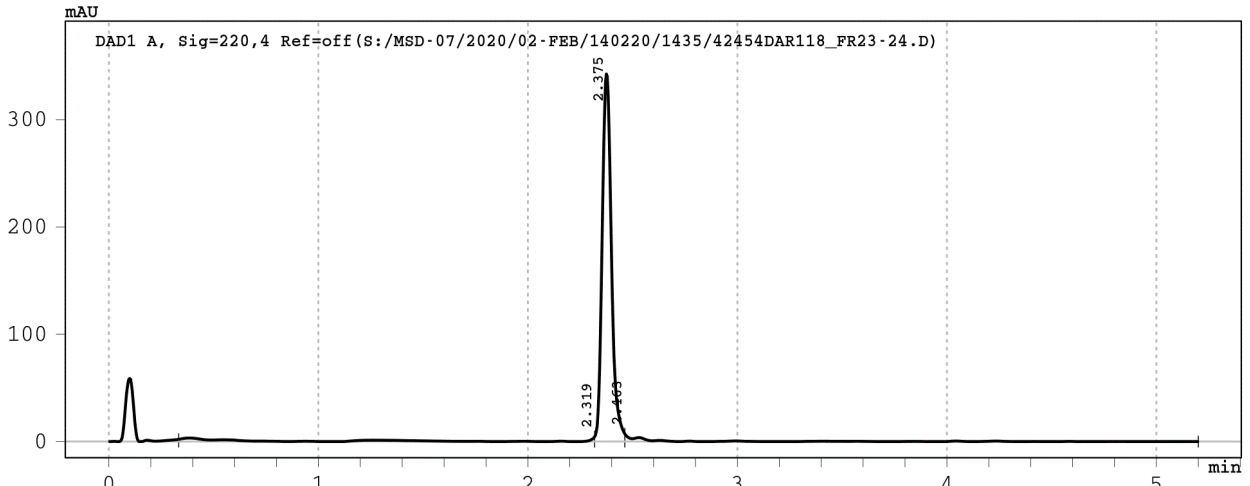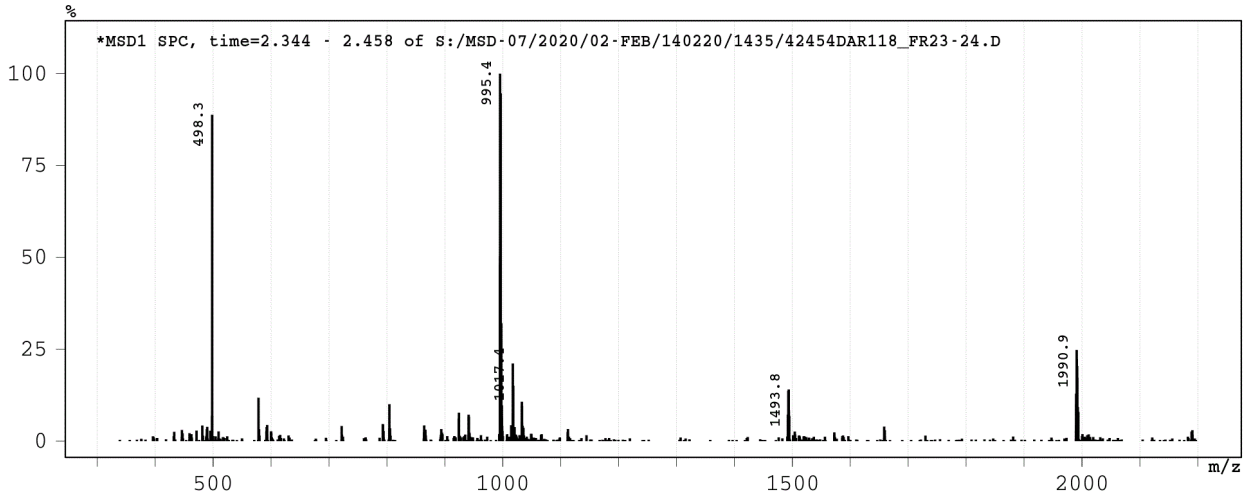

Signal 1: DAD1 A, Sig=220,4 Ref=off

| Peak # | RT [min] | Width [min] | Area   | Area % |
|--------|----------|-------------|--------|--------|
| 1      | 2.319    | 1.99        | 74.9   | 6.4    |
| 2      | 2.375    | 0.14        | 1057.0 | 90.1   |
| 3      | 2.463    | 2.74        | 40.7   | 3.5    |

Data File : S:/MSD-07/2020/02-FEB/140220/1435/42454DAR119\_FR2->



Injection Date : 15-Feb-20, 00:09:59  
Sample Name : 42454DAR119\_FR27-28  
Remarks : Baseline corrected  
Acq. Method : D:/METHODS/5-95-6M.M  
column used : Je\_559  
Analysis Method : C:/CHEM32/1/METHODS/JPT-LCMS.M

Sample Info : 42454\_119-Dr. Martine Darwish H-AALTFRRL-OH

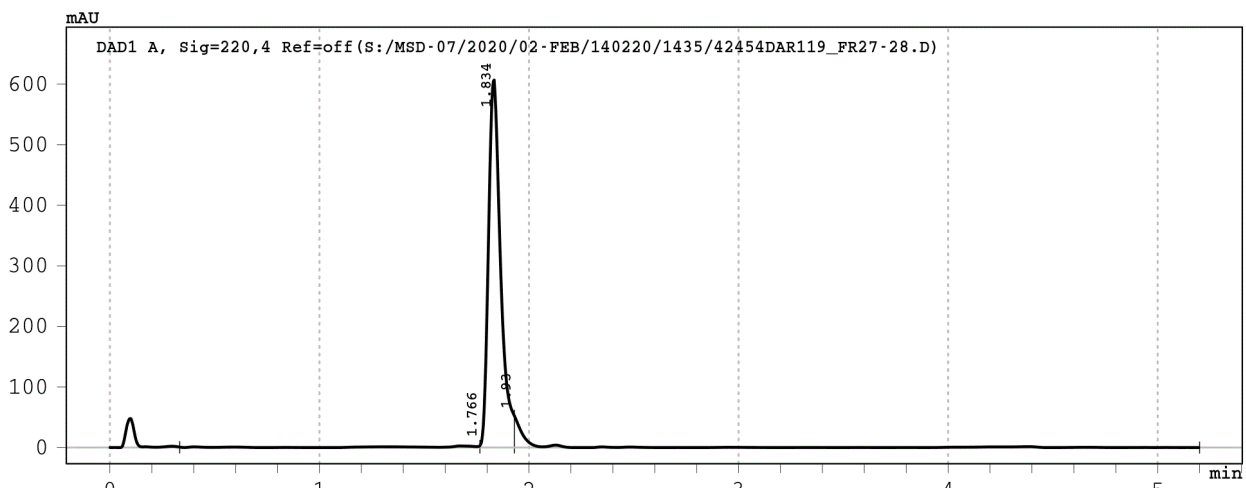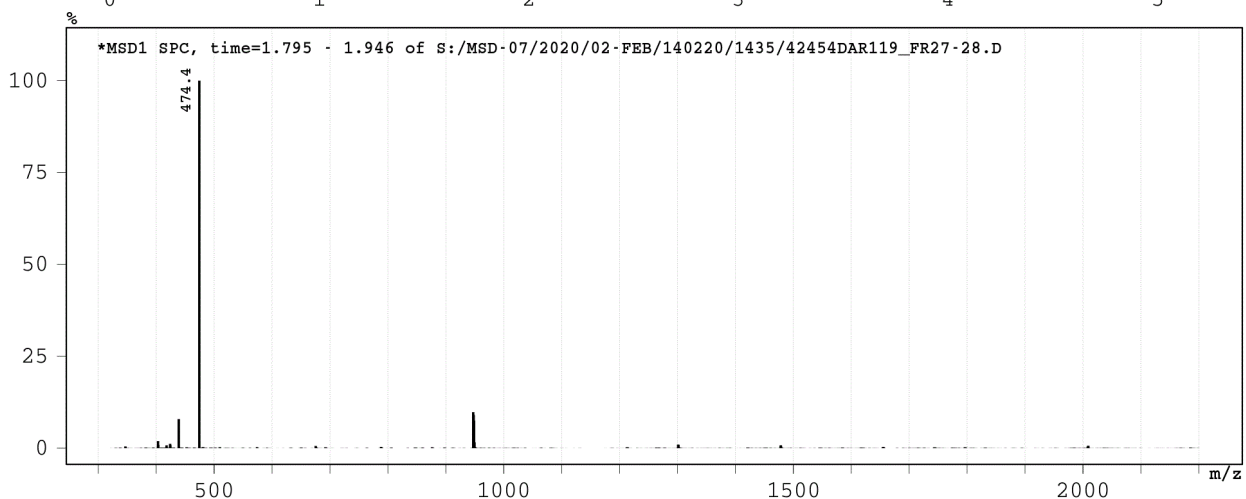

Signal 1: DAD1 A, Sig=220,4 Ref=off

| Peak # | RT [min] | Width [min] | Area   | Area % |
|--------|----------|-------------|--------|--------|
| 1      | 1.766    | 1.43        | 55.5   | 2.1    |
| 2      | 1.834    | 0.16        | 2440.1 | 91.0   |
| 3      | 1.930    | 3.27        | 185.5  | 6.9    |

Data File: S:\MSD-07\2020\02-FEB\060220\142->

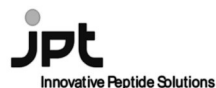

Injection Date : Thu, 6. Feb. 2020  
Sample Name : 240120SG1-87|42454Dar120  
Acq Operator : SYSTEM  
Acq. Method : D:\Data\2020\02-FEB\060220\1429\5-95-6M.M  
column used :  
Analysis Method : C:\Chem32\1\METHODS\DEF\_LC.M

Sample Info : 42454\_120-Dr. Martine Darwish|H-CGLVPLARL-OH

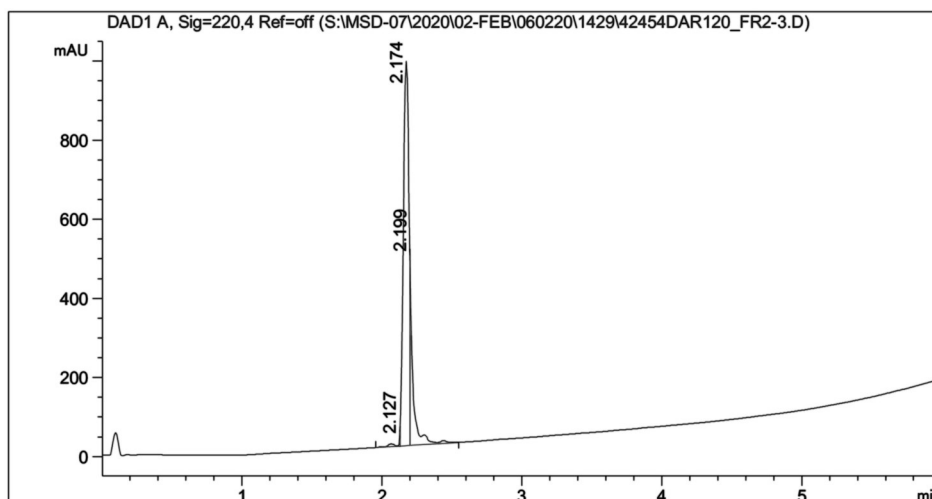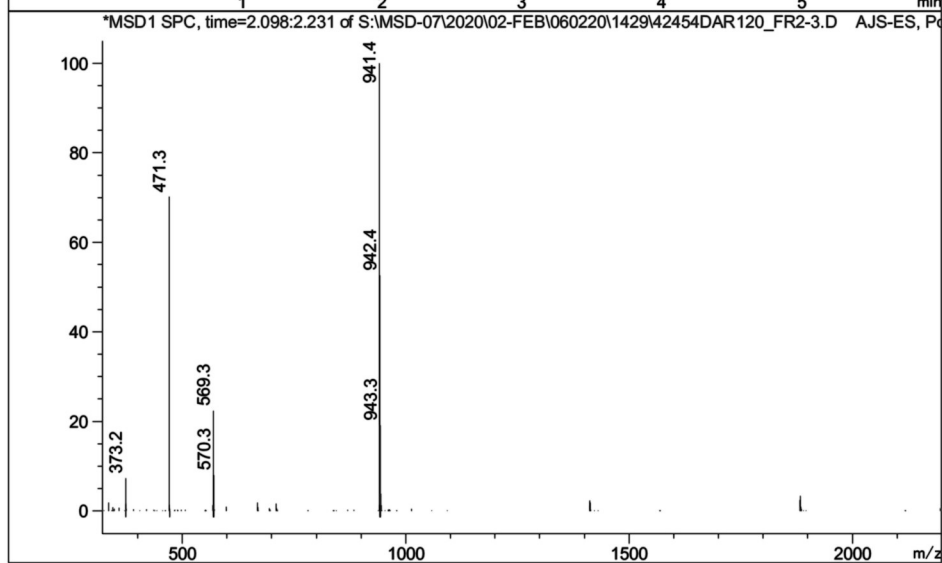

Signal 1: DAD1 A, Sig=220,4 Ref=off

| Peak # | RT [min] | Width [min] | Area   | Area % |
|--------|----------|-------------|--------|--------|
| 1      | 2.127    | 0.0         | 47.8   | 1.4    |
| 2      | 2.174    | 0.0         | 2664.3 | 80.6   |
| 3      | 2.199    | 0.0         | 595.3  | 18.0   |

\*\*\* End of Report \*\*\*

Data File : S:/MSD-07/2020/02-FEB/070220/1430/42454DAR121\_FR3->



Injection Date : 07-Feb-20, 17:16:14  
Sample Name : 42454DAR121\_FR35-36  
Remarks : Baseline corrected  
Acq. Method : D:/METHODS/5-95-6M.M  
column used : Je\_559  
Analysis Method : C:/CHEM32/1/METHODS/JPT-LCMS.M

Sample Info : 42454\_121-Dr. Martine Darwish H-LNFLHNFITRI-OH

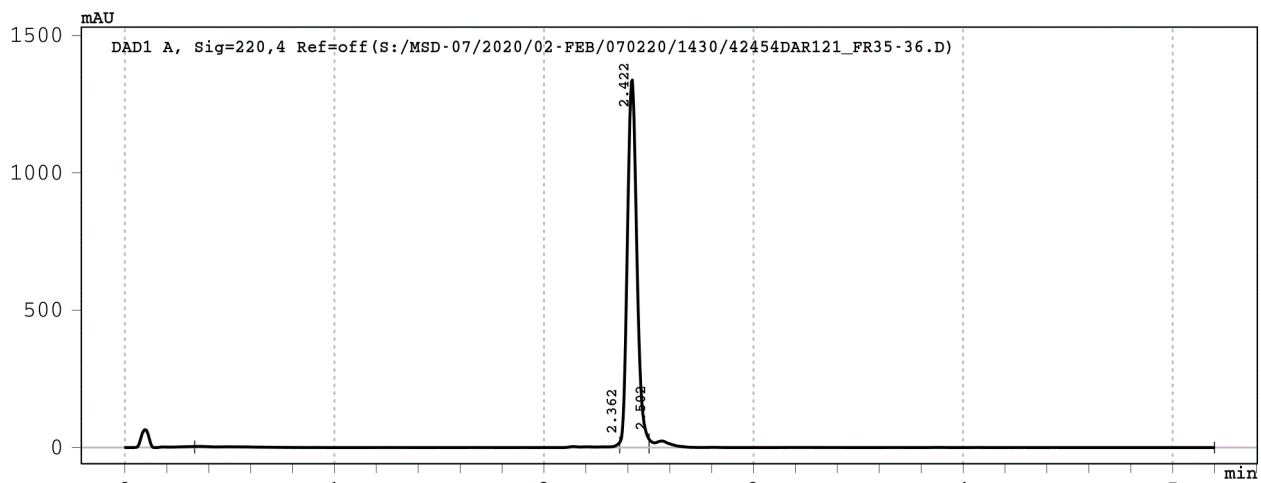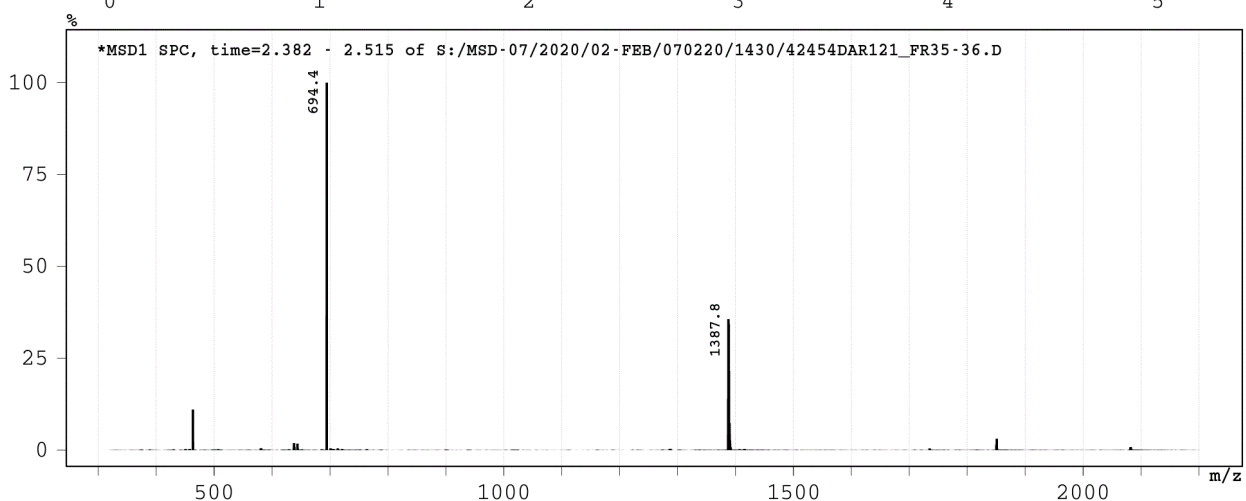

Signal 1: DAD1 A, Sig=220,4 Ref=off

| Peak # | RT [min] | Width [min] | Area   | Area % |
|--------|----------|-------------|--------|--------|
| 1      | 2.362    | 2.03        | 109.8  | 2.4    |
| 2      | 2.422    | 0.14        | 4220.9 | 93.9   |
| 3      | 2.502    | 2.70        | 163.2  | 3.6    |

Data File : S:/MSD-07/2020/02-FEB/070220/1430/42454DAR122\_FR4 ->



Injection Date : 07-Feb-20, 17:24:38  
Sample Name : 42454DAR122\_FR41  
Remarks : Baseline corrected  
Acq. Method : D:/METHODS/5-95-6M.M  
column used : Je\_559  
Analysis Method : C:/CHEM32/1/METHODS/JPT-LCMS.M

Sample Info : 42454\_122-Dr. Martine Darwish H-EALVNLNKL-OH

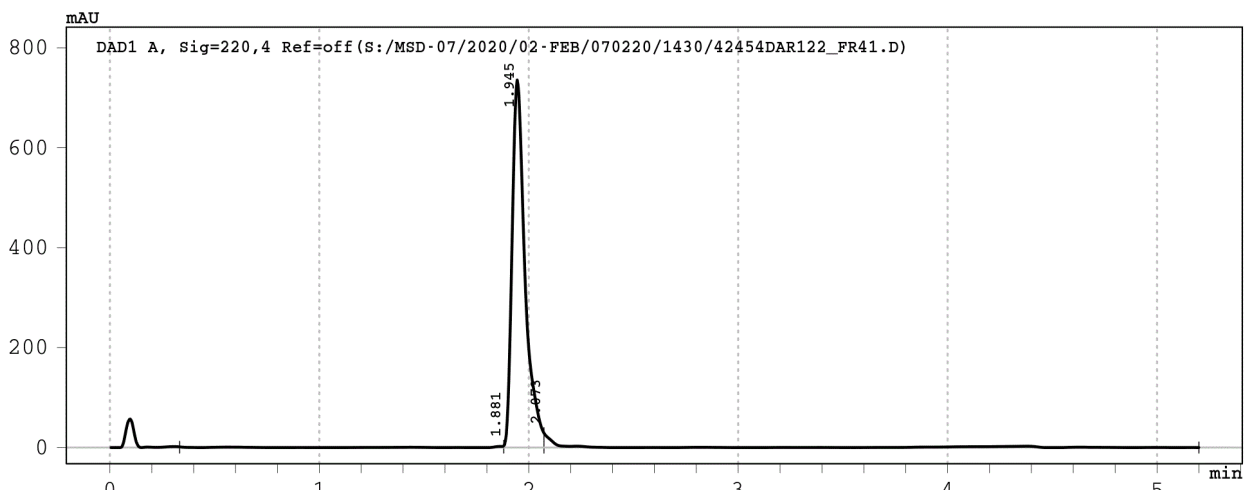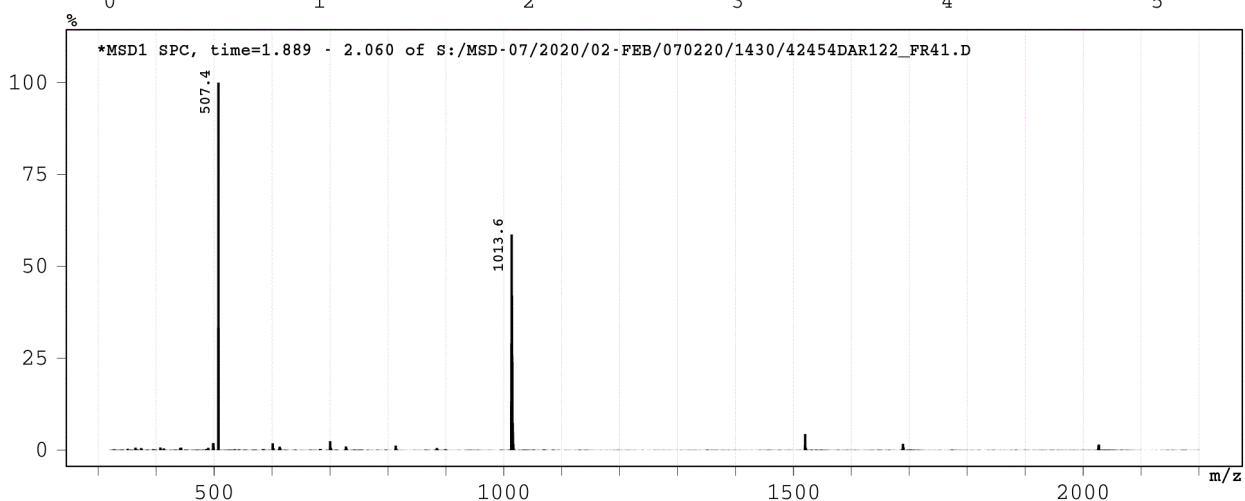

Signal 1: DAD1 A, Sig=220,4 Ref=off

| Peak # | RT [min] | Width [min] | Area   | Area % |
|--------|----------|-------------|--------|--------|
| 1      | 1.881    | 1.55        | 24.8   | 0.7    |
| 2      | 1.945    | 0.19        | 3171.3 | 94.4   |
| 3      | 2.073    | 3.13        | 163.3  | 4.9    |

Data File : S:/MSD-07/2020/02-FEB/060220/1429/42454DAR123\_FR7->



Injection Date : 06-Feb-20, 18:30:33  
Sample Name : 42454DAR123\_FR7-8  
Remarks : Baseline corrected  
Acq. Method : D:/METHODS/5-95-6M.M  
column used : Je\_559  
Analysis Method : C:/CHEM32/1/METHODS/JPT-LCMS.M

Sample Info : 42454\_123-Dr. Martine Darwish H-VMKAHRTSL-OH

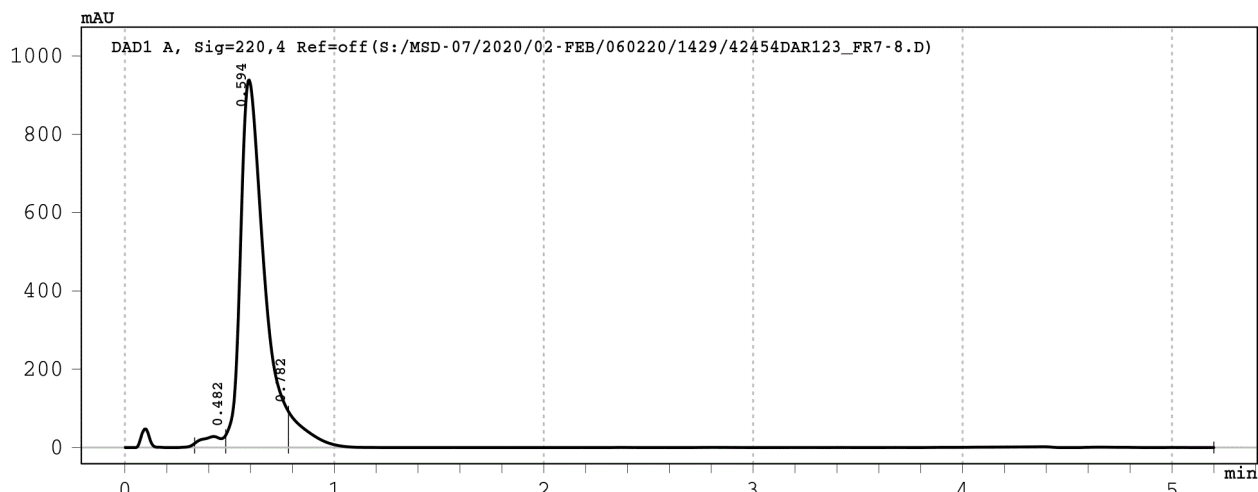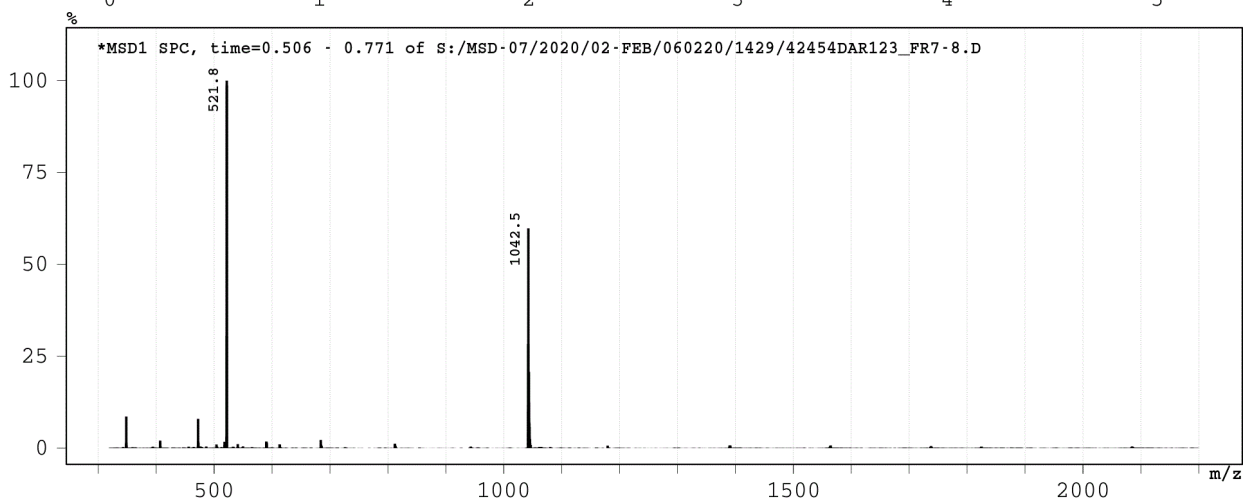

Signal 1: DAD1 A, Sig=220,4 Ref=off

| Peak # | RT [min] | Width [min] | Area   | Area % |
|--------|----------|-------------|--------|--------|
| 1      | 0.482    | 0.15        | 204.9  | 2.6    |
| 2      | 0.594    | 0.30        | 7228.1 | 90.2   |
| 3      | 0.782    | 4.42        | 583.7  | 7.3    |



Data File : S:/MSD-07/2020/02-FEB/070220/1430/42454DAR124\_FR4->  
 Injection Date : 07-Feb-20, 17:33:02  
 Sample Name : 42454DAR124\_FR48-50  
 Remarks : Baseline corrected  
 Acq. Method : D:/METHODS/5-95-6M.M  
 column used : Je\_559  
 Analysis Method : C:/CHEM32/1/METHODS/JPT-LCMS.M



Sample Info : 42454\_124-Dr. Martine Darwish H-SVFGQSNL-OH

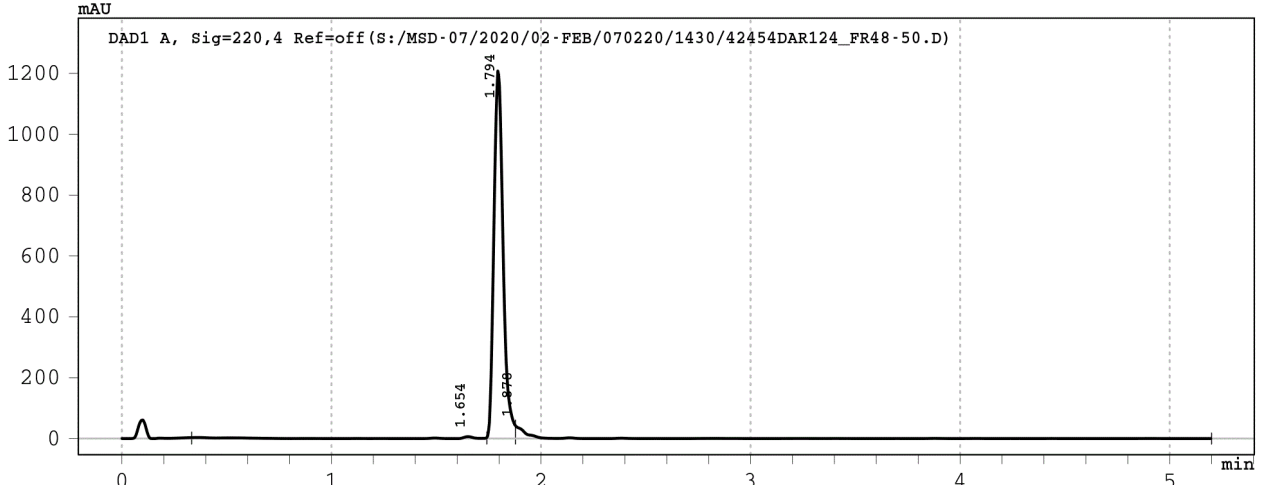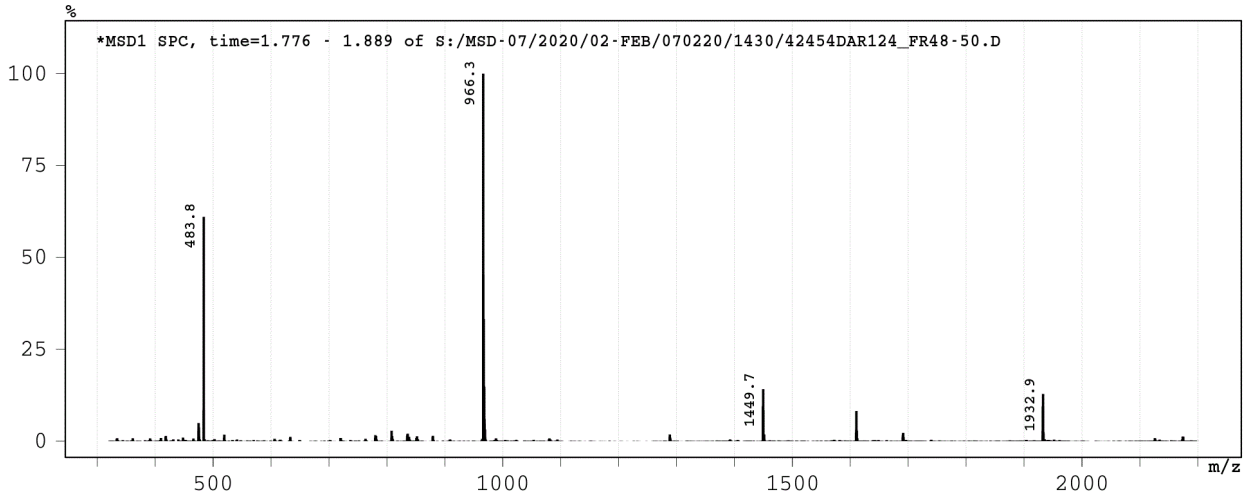

Signal 1: DAD1 A, Sig=220,4 Ref=off

| Peak # | RT [min] | Width [min] | Area   | Area % |
|--------|----------|-------------|--------|--------|
| 1      | 1.654    | 1.41        | 71.7   | 1.8    |
| 2      | 1.794    | 0.14        | 3706.5 | 94.2   |
| 3      | 1.878    | 3.32        | 156.3  | 4.0    |

Data File : S:/MSD-07/2020/02-FEB/110220/1433/42454DAR125\_FR3->



Injection Date : 12-Feb-20, 00:09:59  
Sample Name : 42454DAR125\_FR39-41  
Remarks : Baseline corrected  
Acq. Method : D:/METHODS/5-95-6M.M  
column used : Je\_559  
Analysis Method : C:/CHEM32/1/METHODS/JPT-LCMS.M

Sample Info : 42454\_125-Dr. Martine Darwish H-SLRSFQAL-OH

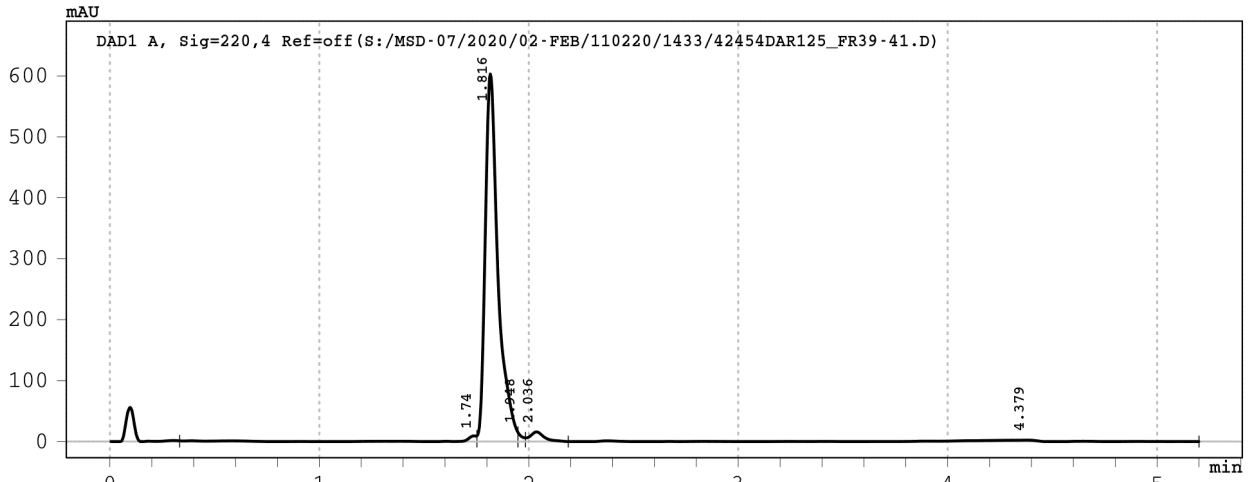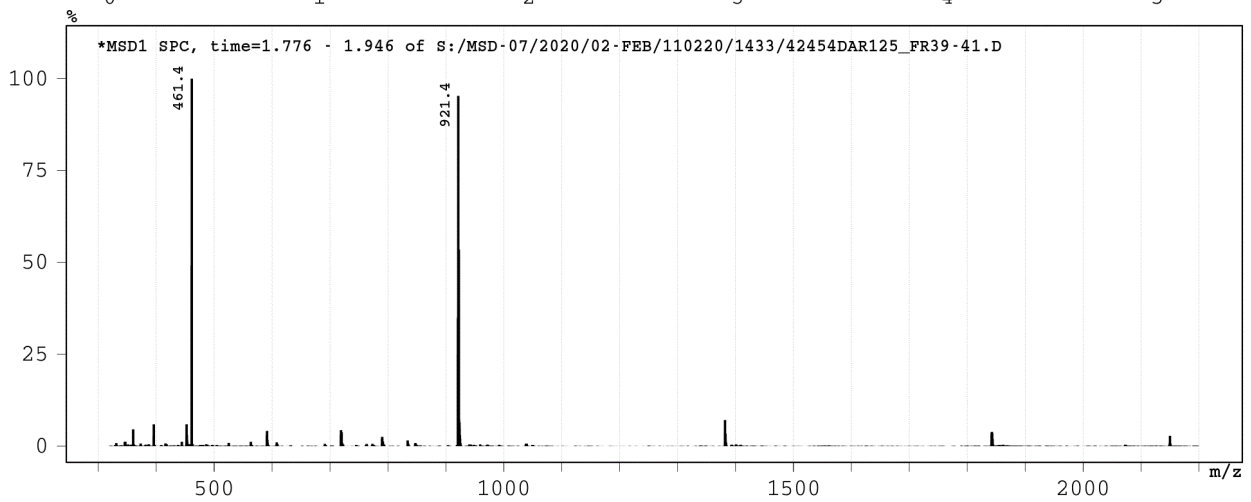

Signal 1: DAD1 A, Sig=220,4 Ref=off

| Peak # | RT [min] | Width [min] | Area   | Area % |
|--------|----------|-------------|--------|--------|
| 1      | 1.740    | 1.42        | 51.4   | 1.9    |
| 2      | 1.816    | 0.20        | 2561.4 | 92.4   |
| 3      | 1.948    | 0.04        | 19.1   | 0.7    |
| 4      | 2.036    | 0.20        | 73.9   | 2.7    |
| 5      | 4.379    | 3.01        | 67.6   | 2.4    |

Data File : S:/MSD-07/2020/02-FEB/070220/1430/42454DAR126\_FR6->



Injection Date : 07-Feb-20, 17:41:24  
Sample Name : 42454DAR126\_FR62  
Remarks : Baseline corrected  
Acq. Method : D:/METHODS/5-95-6M.M  
column used : Je\_559  
Analysis Method : C:/CHEM32/1/METHODS/JPT-LCMS.M

Sample Info : 42454\_126-Dr. Martine Darwish H-FSLSFQHPV-OH

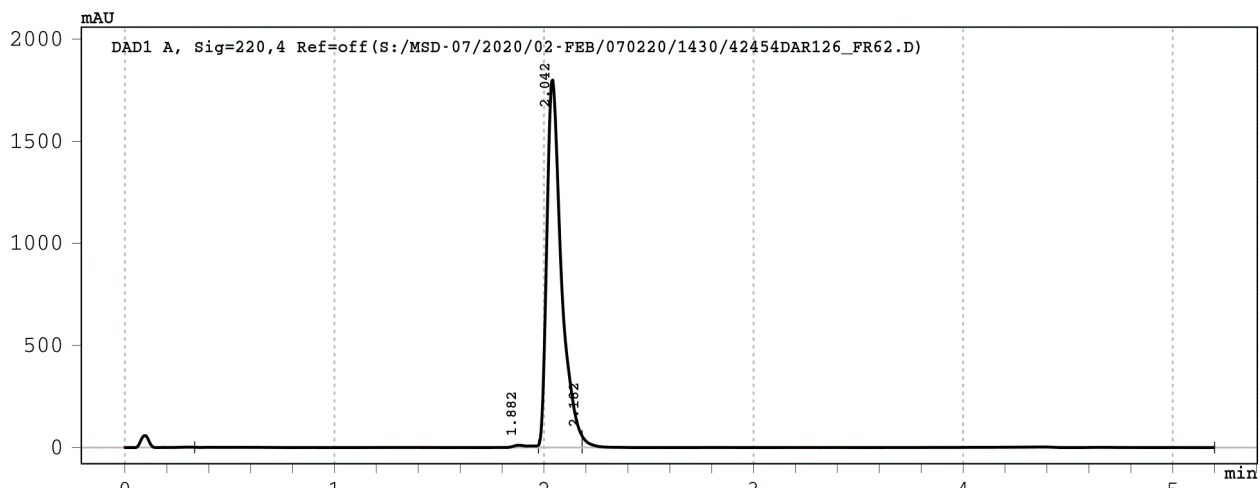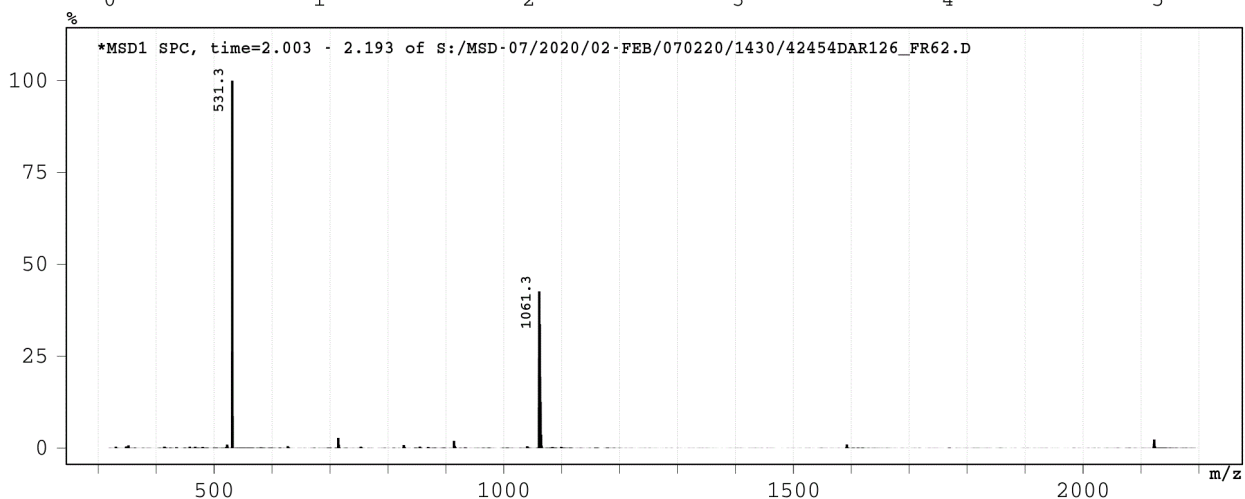

Signal 1: DAD1 A, Sig=220,4 Ref=off

| Peak # | RT [min] | Width [min] | Area   | Area % |
|--------|----------|-------------|--------|--------|
| 1      | 1.882    | 1.64        | 95.8   | 1.1    |
| 2      | 2.042    | 0.21        | 8656.1 | 96.9   |
| 3      | 2.182    | 3.02        | 182.3  | 2.0    |

Data File : S:/MSD-07/2020/02-FEB/110220/1433/42454DAR127\_FR5->  
 Injection Date : 12-Feb-20, 00:18:23  
 Sample Name : 42454DAR127\_FR53-55  
 Remarks : Baseline corrected  
 Acq. Method : D:/METHODS/5-95-6M.M  
 column used : Je\_559  
 Analysis Method : C:/CHEM32/1/METHODS/JPT-LCMS.M



Sample Info : 42454\_127-Dr. Martine Darwish H-SSVLFEYM-OH

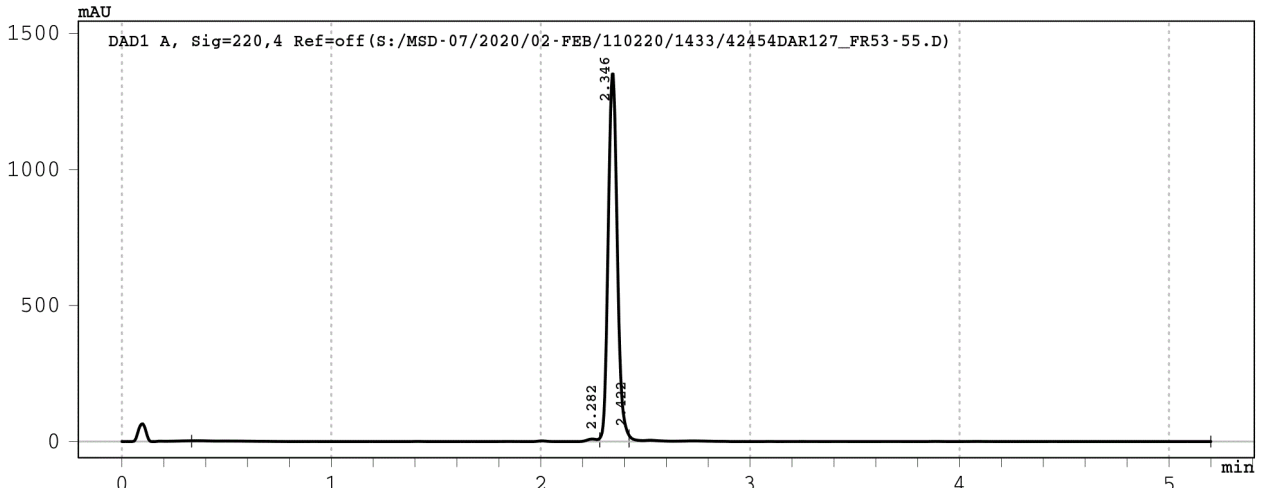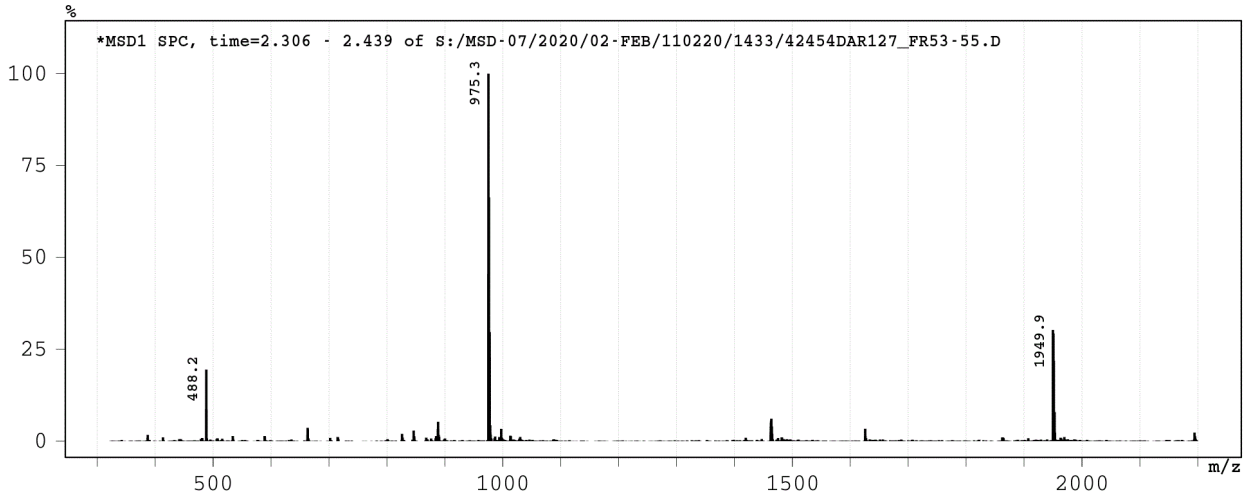

Signal 1: DAD1 A, Sig=220,4 Ref=off

| Peak # | RT [min] | Width [min] | Area   | Area % |
|--------|----------|-------------|--------|--------|
| 1      | 2.282    | 1.95        | 83.8   | 2.0    |
| 2      | 2.346    | 0.14        | 4103.7 | 96.0   |
| 3      | 2.422    | 2.78        | 87.3   | 2.0    |

Data File : S:/MSD-07/2020/02-FEB/070220/1430/42454DAR128\_FR7->



Injection Date : 07-Feb-20, 17:49:46  
Sample Name : 42454DAR128\_FR73-74  
Remarks : Baseline corrected  
Acq. Method : D:/METHODS/5-95-6M.M  
column used : Je\_559  
Analysis Method : C:/CHEM32/1/METHODS/JPT-LCMS.M

Sample Info : 42454\_128-Dr. Martine Darwish H-SVYRHQQPT-OH

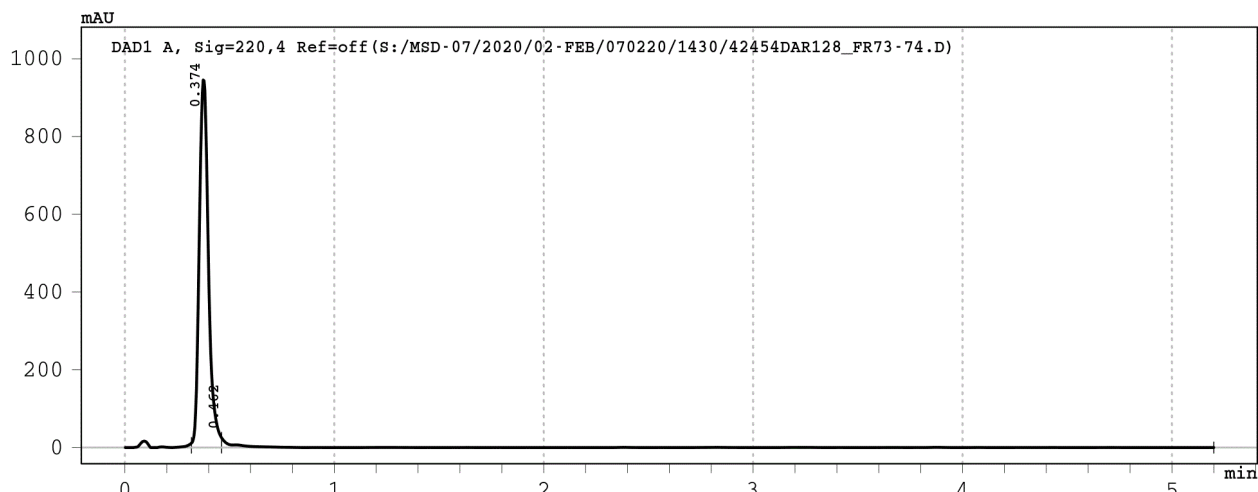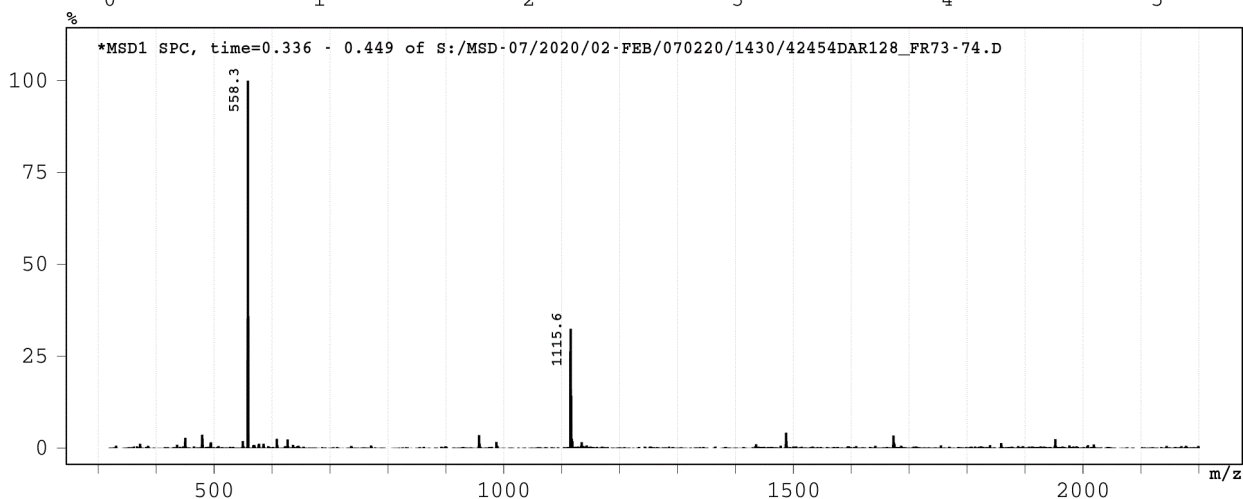

Signal 1: DAD1 A, Sig=220,4 Ref=off

| Peak # | RT [min] | Width [min] | Area   | Area % |
|--------|----------|-------------|--------|--------|
| 1      | 0.374    | 0.14        | 2910.7 | 96.7   |
| 2      | 0.462    | 4.74        | 99.1   | 3.3    |

Data File : S:/MSD-07/2020/02-FEB/060220/1429/42454DAR129\_FR1->



Injection Date : 06-Feb-20, 18:38:56  
Sample Name : 42454DAR129\_FR16-18  
Remarks : Baseline corrected  
Acq. Method : D:/METHODS/5-95-6M.M  
column used : Je\_559  
Analysis Method : C:/CHEM32/1/METHODS/JPT-LCMS.M

Sample Info : 42454\_129-Dr. Martine Darwish H-CAMGFFLQI-OH

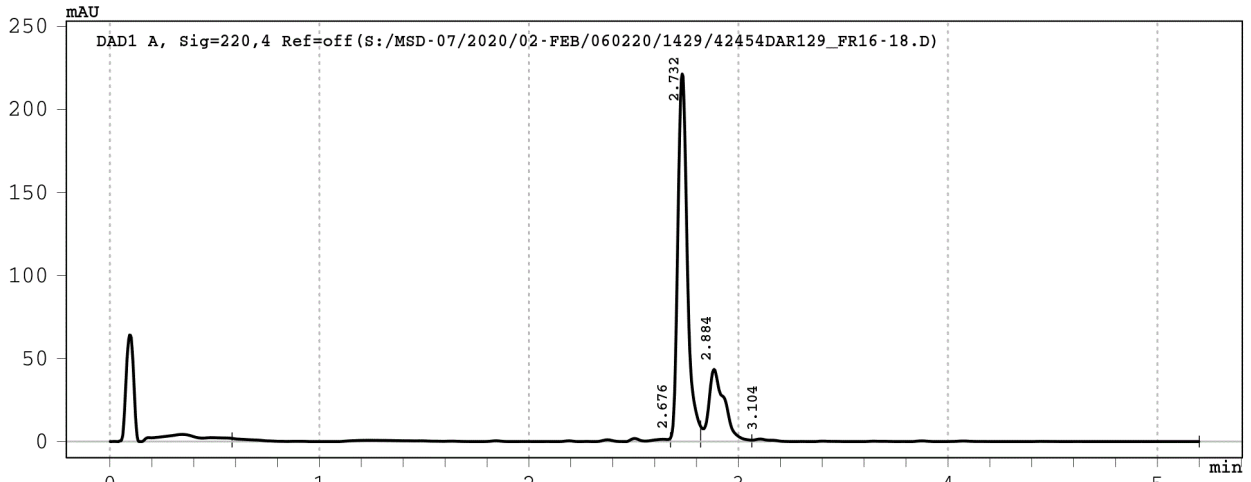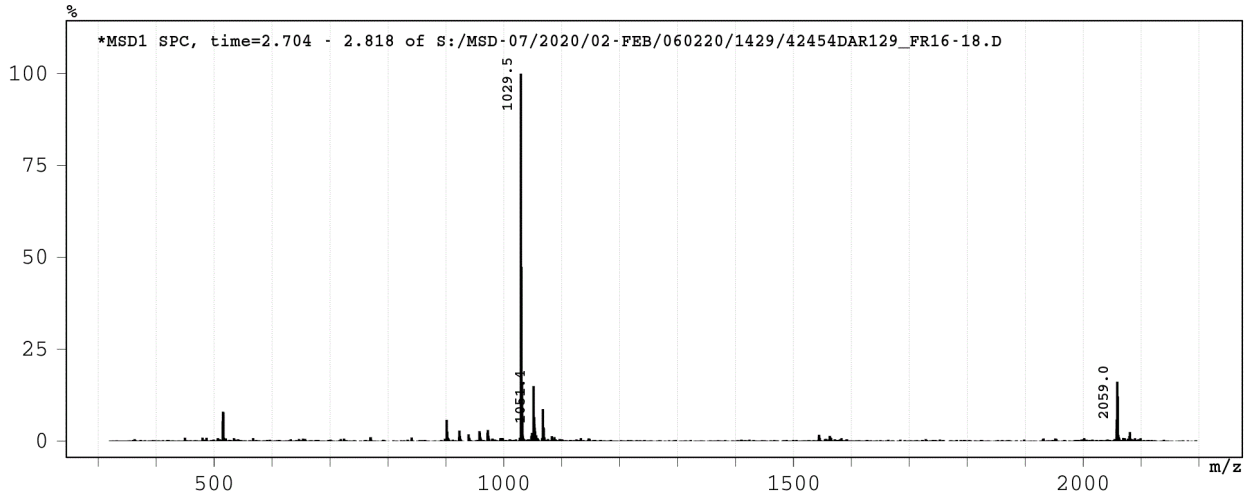

Signal 1: DAD1 A, Sig=220,4 Ref=off

| Peak # | RT [min] | Width [min] | Area  | Area % |
|--------|----------|-------------|-------|--------|
| 1      | 2.676    | 2.09        | 45.9  | 4.6    |
| 2      | 2.732    | 0.14        | 704.9 | 71.0   |
| 3      | 2.884    | 0.24        | 229.4 | 23.1   |
| 4      | 3.104    | 2.14        | 13.0  | 1.3    |

Data File : S:/MSD-07/2020/02-FEB/180220/1438/42454DAR130\_FR3 ->



Injection Date : 18-Feb-20, 09:58:03  
Sample Name : 42454DAR130\_FR30  
Remarks : Baseline corrected  
Acq. Method : D:/METHODS/5-95-6M.M  
column used : Je\_559  
Analysis Method : C:/CHEM32/1/METHODS/JPT-LCMS.M

Sample Info : 42454\_130-Dr. Martine Darwish H-QQHTFAQV-OH

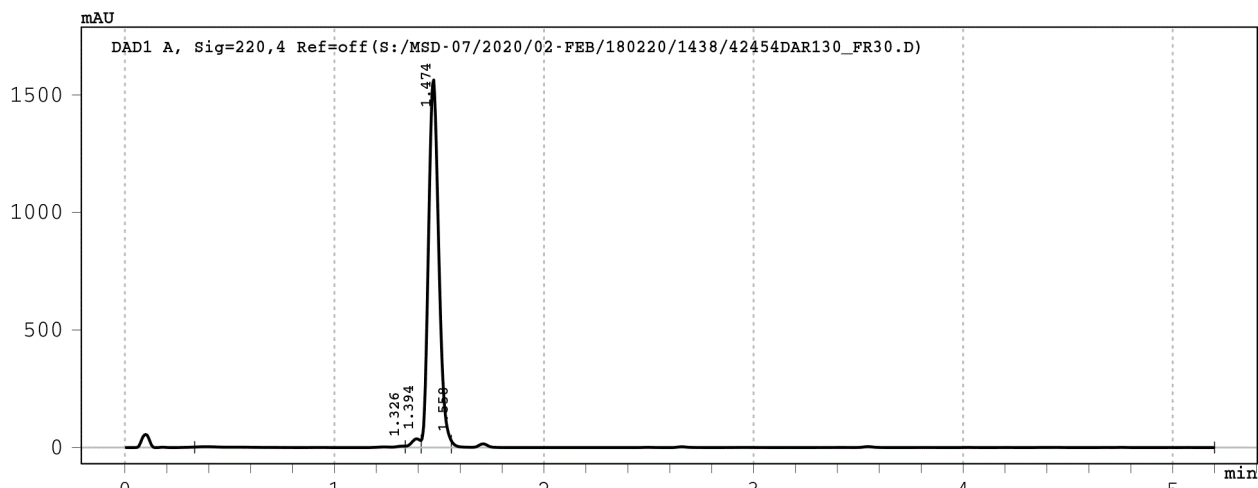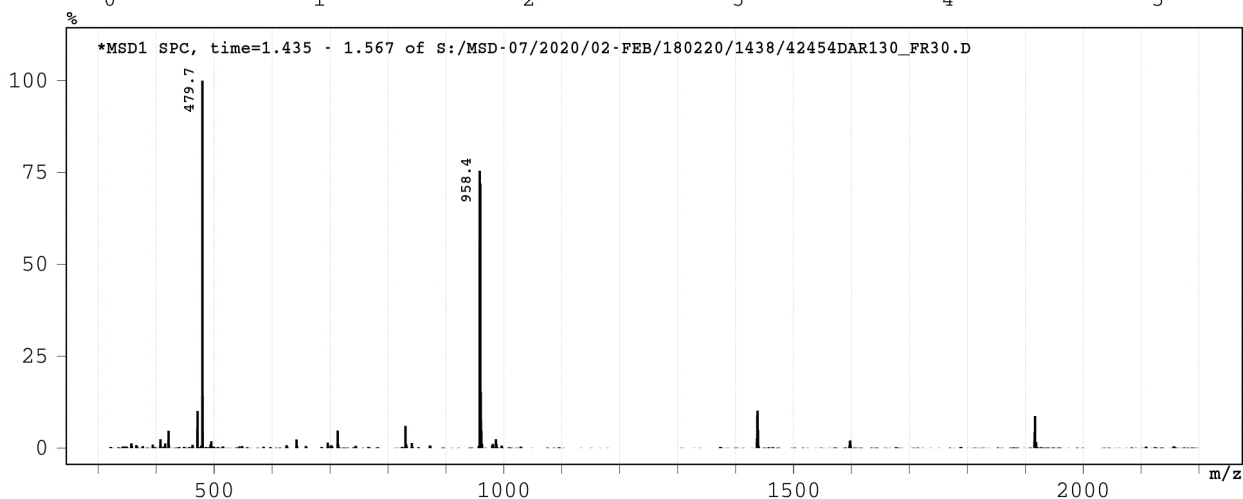

Signal 1: DAD1 A, Sig=220,4 Ref=off

| Peak # | RT [min] | Width [min] | Area   | Area % |
|--------|----------|-------------|--------|--------|
| 1      | 1.326    | 1.00        | 68.7   | 1.2    |
| 2      | 1.394    | 0.08        | 107.7  | 1.9    |
| 3      | 1.474    | 0.14        | 5317.9 | 94.7   |
| 4      | 1.558    | 3.64        | 123.6  | 2.2    |

Data File : S:/MSD-07/2020/02-FEB/110220/1433/42454DAR131\_FR6->  
 Injection Date : 12-Feb-20, 00:26:47  
 Sample Name : 42454DAR131\_FR64-65  
 Remarks : Baseline corrected  
 Acq. Method : D:/METHODS/5-95-6M.M  
 column used : Je\_559  
 Analysis Method : C:/CHEM32/1/METHODS/JPT-LCMS.M



Sample Info : 42454\_131-Dr. Martine Darwish H-VGYCETLL-OH

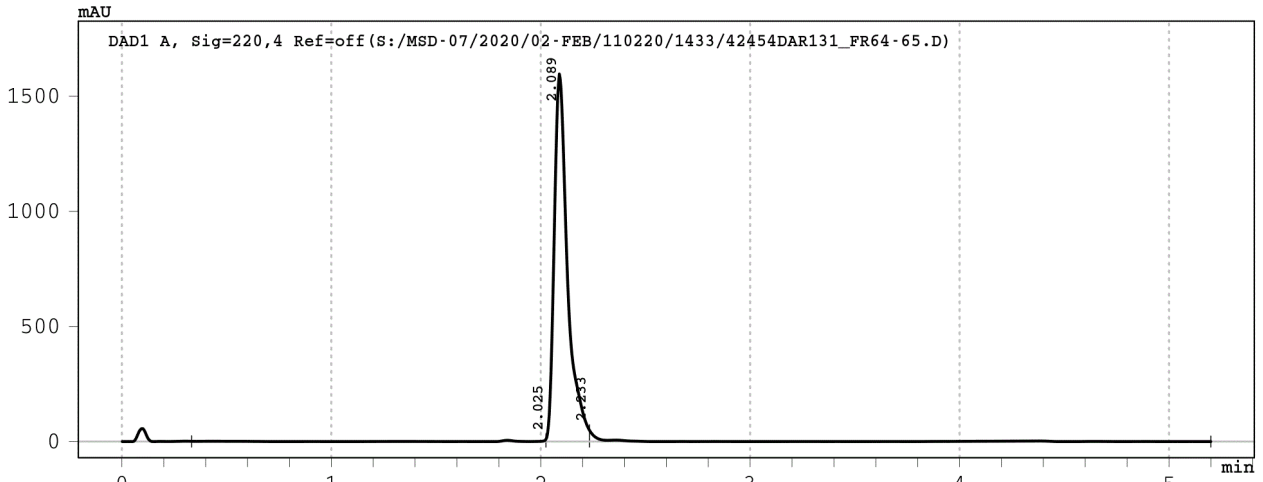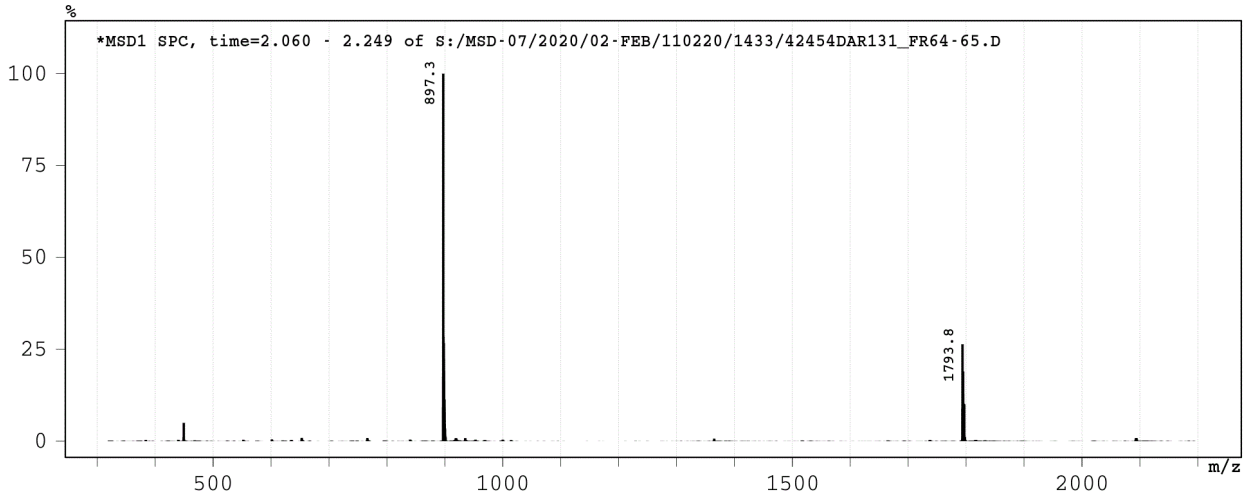

Signal 1: DAD1 A, Sig=220,4 Ref=off

| Peak # | RT [min] | Width [min] | Area   | Area % |
|--------|----------|-------------|--------|--------|
| 1      | 2.025    | 1.69        | 52.9   | 0.7    |
| 2      | 2.089    | 0.21        | 7053.4 | 96.8   |
| 3      | 2.233    | 2.97        | 183.4  | 2.5    |



Data File : S:/MSD-07/2020/02-FEB/070220/1430/42454DAR132\_FR3->  
 Injection Date : 07-Feb-20, 17:58:10  
 Sample Name : 42454DAR132\_FR3-4  
 Remarks : Baseline corrected  
 Acq. Method : D:/METHODS/5-95-6M.M  
 column used : Je\_559  
 Analysis Method : C:/CHEM32/1/METHODS/JPT-LCMS.M



Sample Info : 42454\_132-Dr. Martine Darwish H-TGYVERSPL-OH

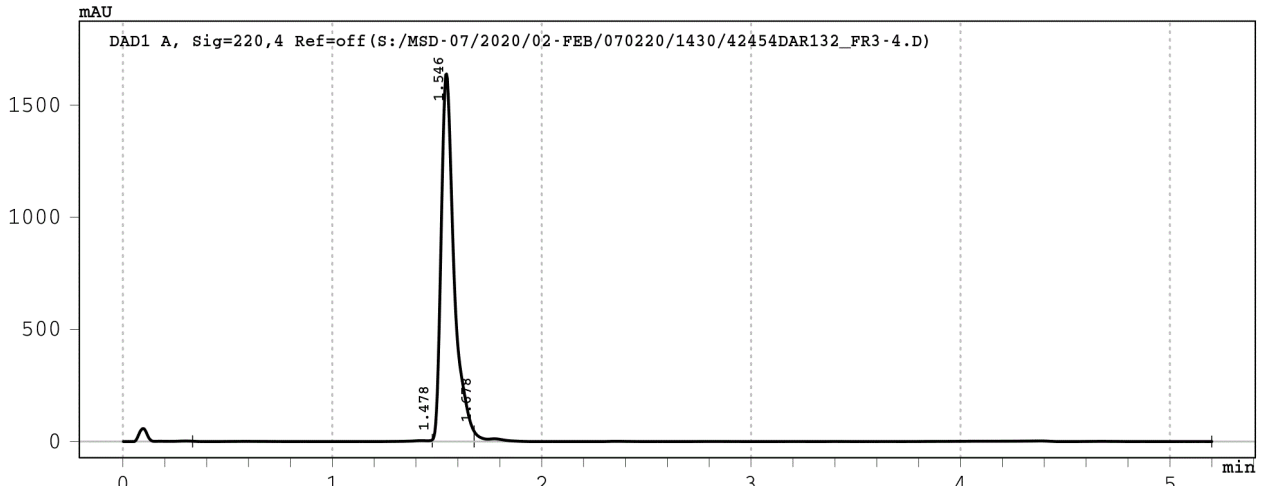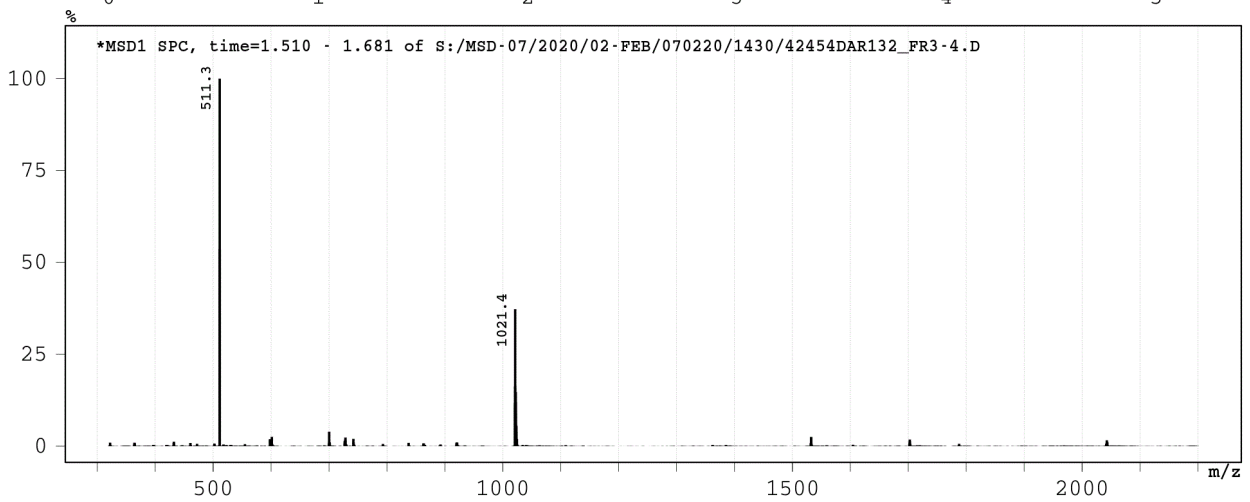

Signal 1: DAD1 A, Sig=220,4 Ref=off

| Peak # | RT [min] | Width [min] | Area   | Area % |
|--------|----------|-------------|--------|--------|
| 1      | 1.478    | 1.14        | 39.1   | 0.5    |
| 2      | 1.546    | 0.20        | 7033.6 | 96.5   |
| 3      | 1.678    | 3.52        | 219.3  | 3.0    |

Data File : S:/MSD-07/2020/02-FEB/110220/1433/42454DAR133\_FR8->  
 Injection Date : 12-Feb-20, 00:35:14  
 Sample Name : 42454DAR133\_FR81-83  
 Remarks : Baseline corrected  
 Acq. Method : D:/METHODS/5-95-6M.M  
 column used : Je\_559  
 Analysis Method : C:/CHEM32/1/METHODS/JPT-LCMS.M



Sample Info : 42454\_133-Dr. Martine Darwish H-ATINFRRL-OH

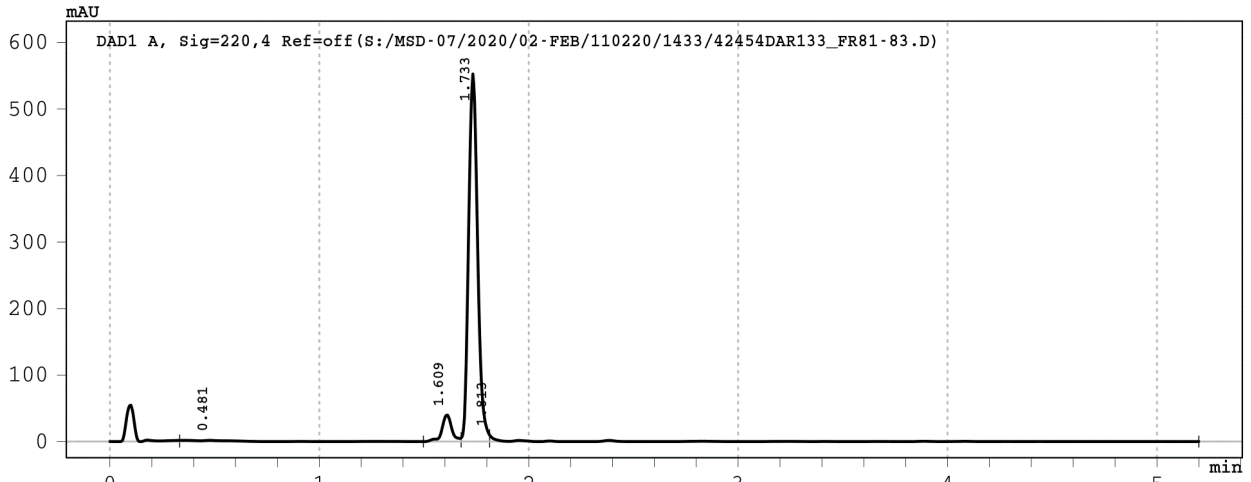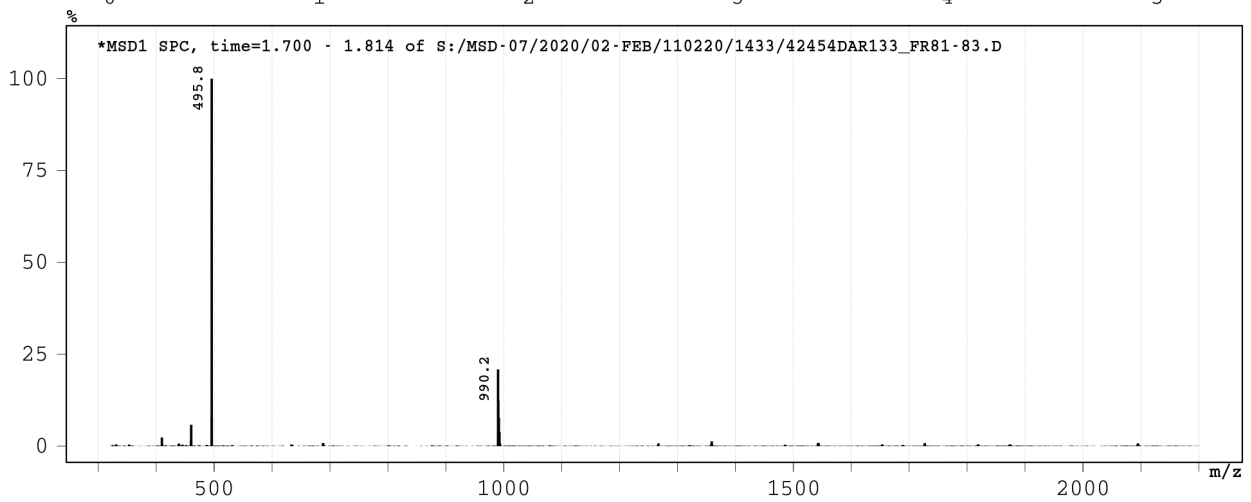

Signal 1: DAD1 A, Sig=220,4 Ref=off

| Peak # | RT [min] | Width [min] | Area   | Area % |
|--------|----------|-------------|--------|--------|
| 1      | 0.481    | 1.16        | 28.3   | 1.5    |
| 2      | 1.609    | 0.18        | 130.8  | 7.1    |
| 3      | 1.733    | 0.14        | 1653.6 | 89.4   |
| 4      | 1.813    | 3.39        | 37.9   | 2.0    |

Data File : S:/MSD-07/2020/02-FEB/070220/1430/42454DAR134\_FR1->  
 Injection Date : 07-Feb-20, 18:06:33  
 Sample Name : 42454DAR134\_FR18-19  
 Remarks : Baseline corrected  
 Acq. Method : D:/METHODS/5-95-6M.M  
 column used : Je\_559  
 Analysis Method : C:/CHEM32/1/METHODS/JPT-LCMS.M



Sample Info : 42454\_134-Dr. Martine Darwish H-YLSHLKRV-OH

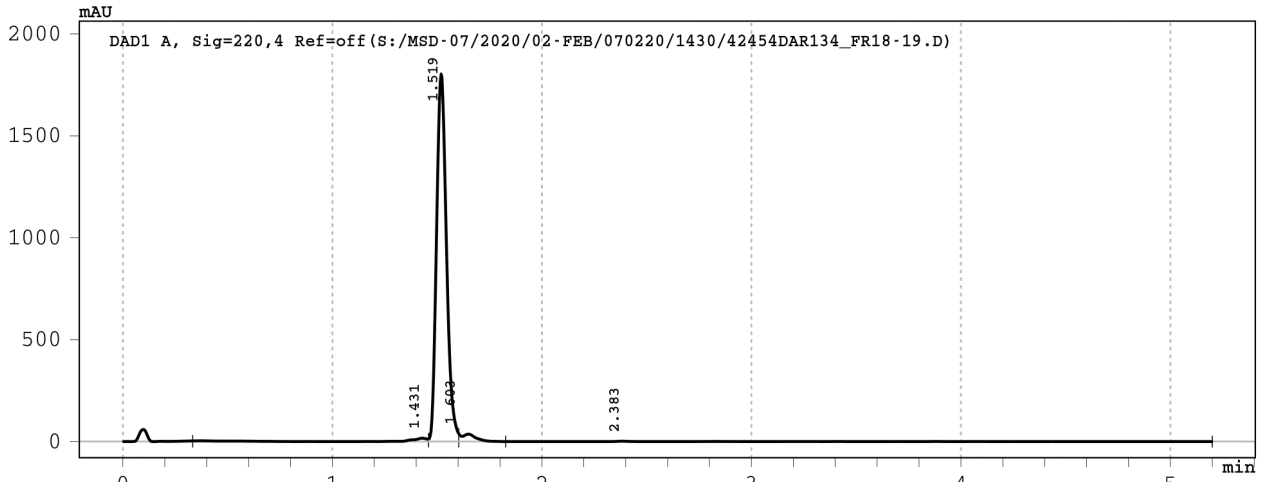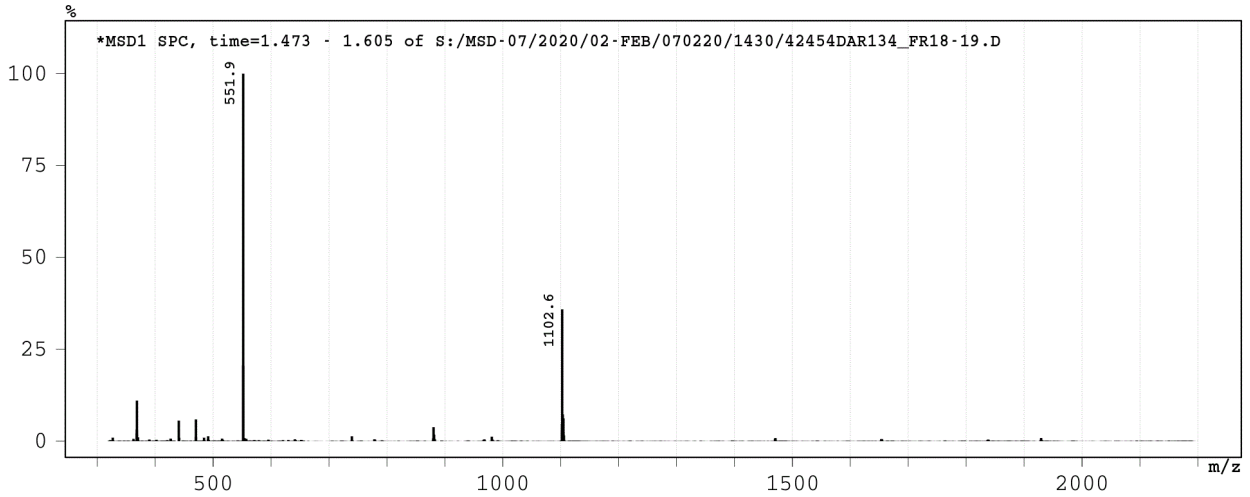

Signal 1: DAD1 A, Sig=220,4 Ref=off

| Peak # | RT [min] | Width [min] | Area   | Area % |
|--------|----------|-------------|--------|--------|
| 1      | 1.431    | 1.13        | 134.5  | 2.1    |
| 2      | 1.519    | 0.14        | 5934.0 | 94.7   |
| 3      | 1.603    | 0.22        | 181.5  | 2.9    |
| 4      | 2.383    | 3.37        | 16.8   | 0.3    |

Data File : S:/MSD-07/2020/02-FEB/140220/1435/42454DAR135\_FR4->  
 Injection Date : 15-Feb-20, 00:18:27  
 Sample Name : 42454DAR135\_FR40-41  
 Remarks : Baseline corrected  
 Acq. Method : D:/METHODS/5-95-6M.M  
 column used : Je\_559  
 Analysis Method : C:/CHEM32/1/METHODS/JPT-LCMS.M



Sample Info : 42454\_135-Dr. Martine Darwish H-VLIQWLPAL-OH

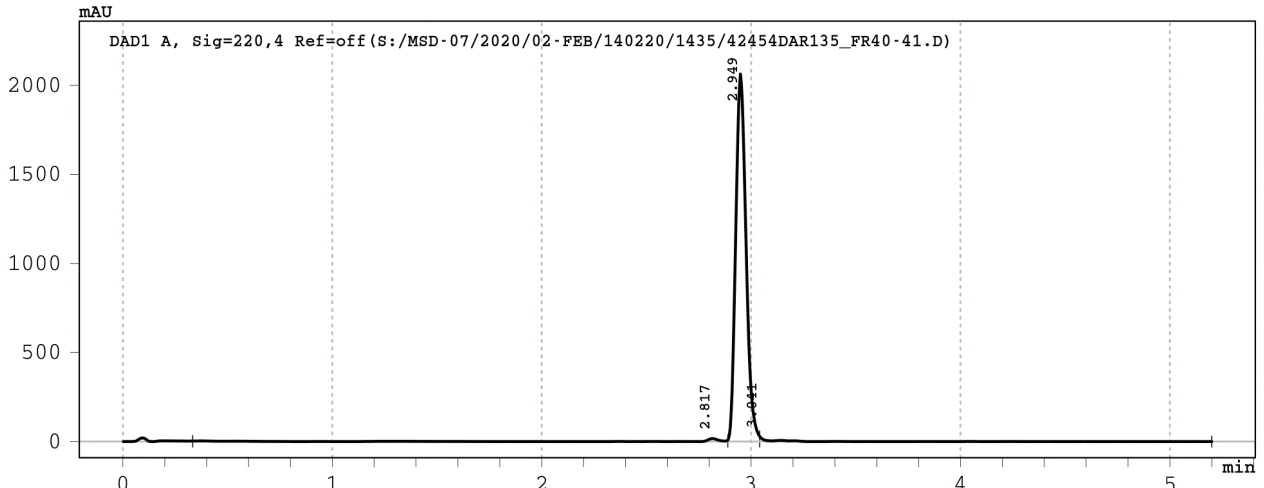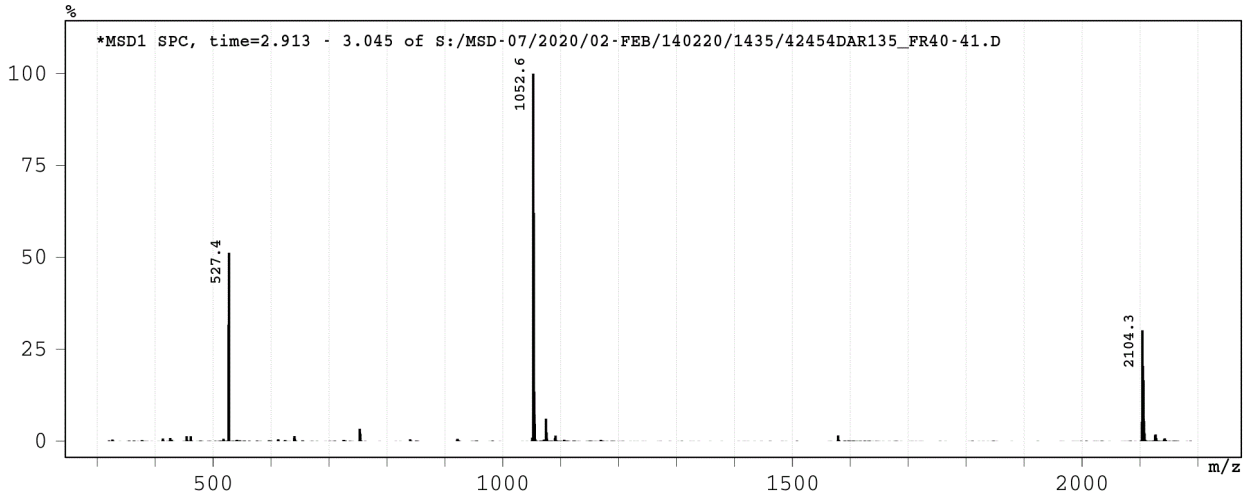

Signal 1: DAD1 A, Sig=220,4 Ref=off

| Peak # | RT [min] | Width [min] | Area   | Area % |
|--------|----------|-------------|--------|--------|
| 1      | 2.817    | 2.56        | 136.8  | 1.9    |
| 2      | 2.949    | 0.15        | 7060.5 | 97.0   |
| 3      | 3.041    | 2.16        | 79.0   | 1.1    |

Data File : S:/MSD-07/2020/02-FEB/070220/1430/42454DAR136\_FR3->  
 Injection Date : 07-Feb-20, 18:14:56  
 Sample Name : 42454DAR136\_FR35-37  
 Remarks : Baseline corrected  
 Acq. Method : D:/METHODS/5-95-6M.M  
 column used : Je\_559  
 Analysis Method : C:/CHEM32/1/METHODS/JPT-LCMS.M



Sample Info : 42454\_136-Dr. Martine Darwish H-FNFWLHKLI-OH

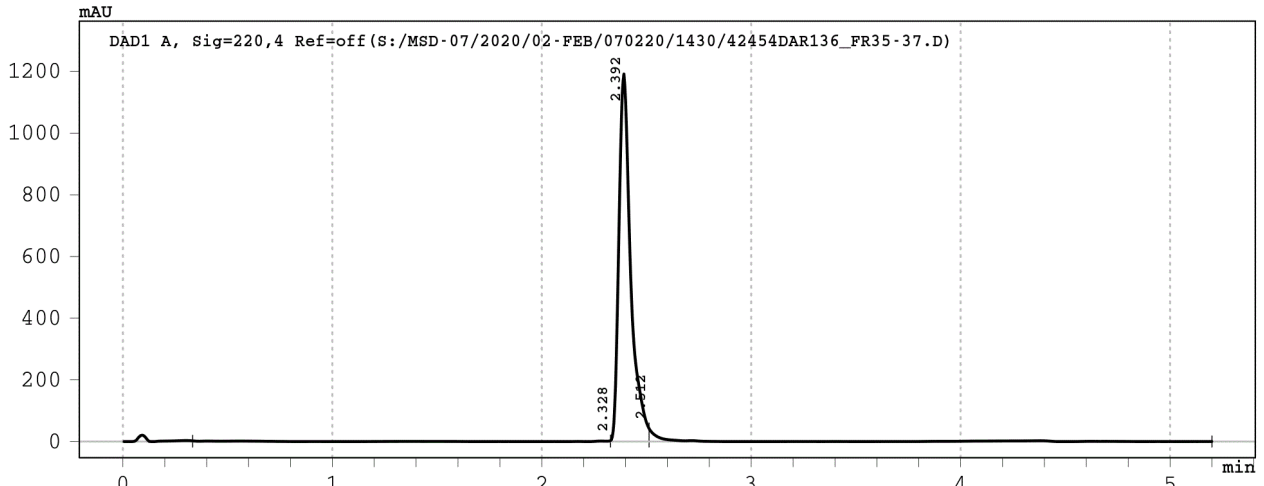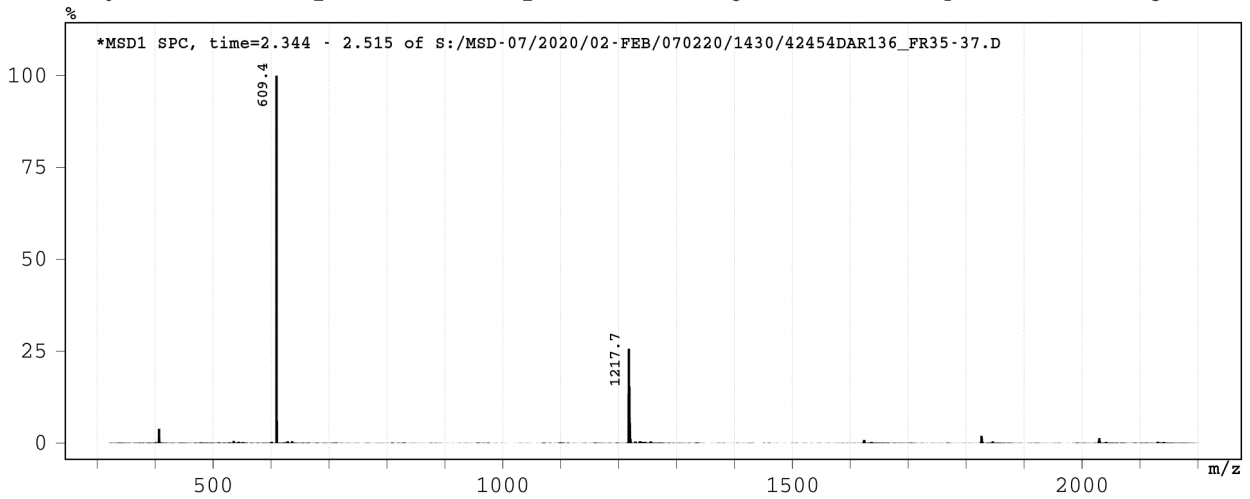

Signal 1: DAD1 A, Sig=220,4 Ref=off

| Peak # | RT [min] | Width [min] | Area   | Area % |
|--------|----------|-------------|--------|--------|
| 1      | 2.328    | 2.00        | 48.8   | 1.0    |
| 2      | 2.392    | 0.18        | 4676.0 | 95.1   |
| 3      | 2.512    | 2.69        | 191.8  | 3.9    |

Data File : S:/MSD-07/2020/02-FEB/070220/1430/42454DAR137\_FR5->



Injection Date : 07-Feb-20, 18:23:17  
Sample Name : 42454DAR137\_FR51-52  
Remarks : Baseline corrected  
Acq. Method : D:/METHODS/5-95-6M.M  
column used : Je\_559  
Analysis Method : C:/CHEM32/1/METHODS/JPT-LCMS.M

Sample Info : 42454\_137-Dr. Martine Darwish H-ASYSLVAHI-OH

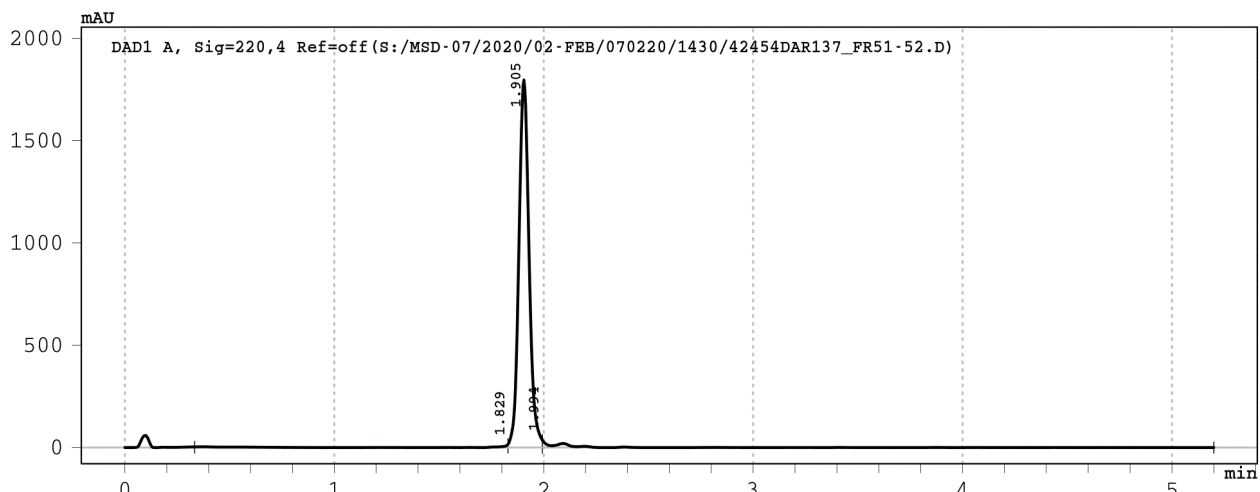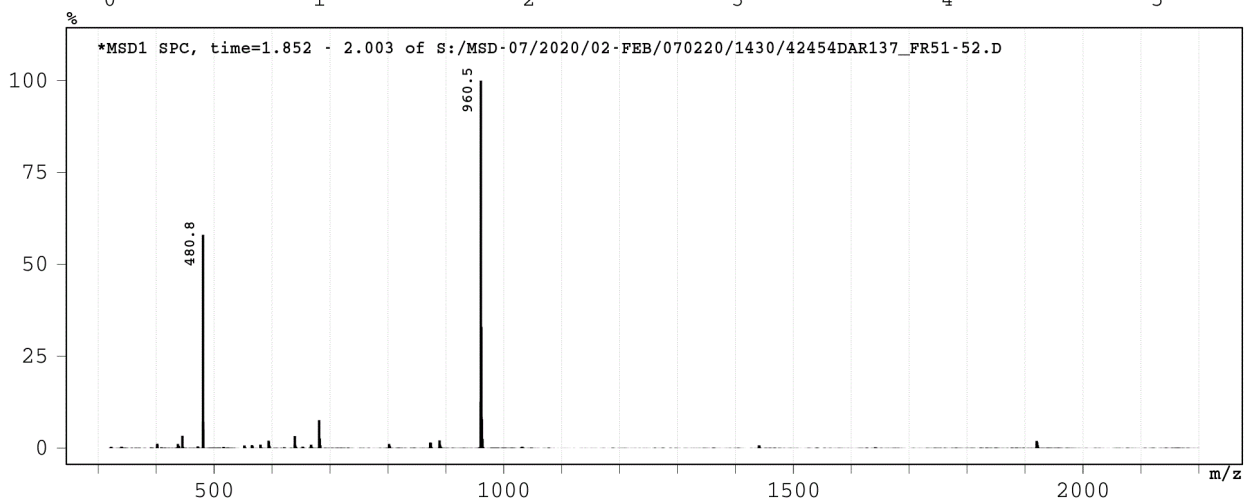

Signal 1: DAD1 A, Sig=220,4 Ref=off

| Peak # | RT [min] | Width [min] | Area   | Area % |
|--------|----------|-------------|--------|--------|
| 1      | 1.829    | 1.50        | 86.2   | 1.4    |
| 2      | 1.905    | 0.16        | 6074.7 | 95.9   |
| 3      | 1.994    | 3.21        | 172.5  | 2.7    |

Data File : S:/MSD-07/2020/02-FEB/110220/1433/42454DAR138\_FR1->



Injection Date : 12-Feb-20, 00:43:40  
Sample Name : 42454DAR138\_FR10-11  
Remarks : Baseline corrected  
Acq. Method : D:/METHODS/5-95-6M.M  
column used : Je\_559  
Analysis Method : C:/CHEM32/1/METHODS/JPT-LCMS.M

Sample Info : 42454\_138-Dr. Martine Darwish H-TSIMQLYL-OH

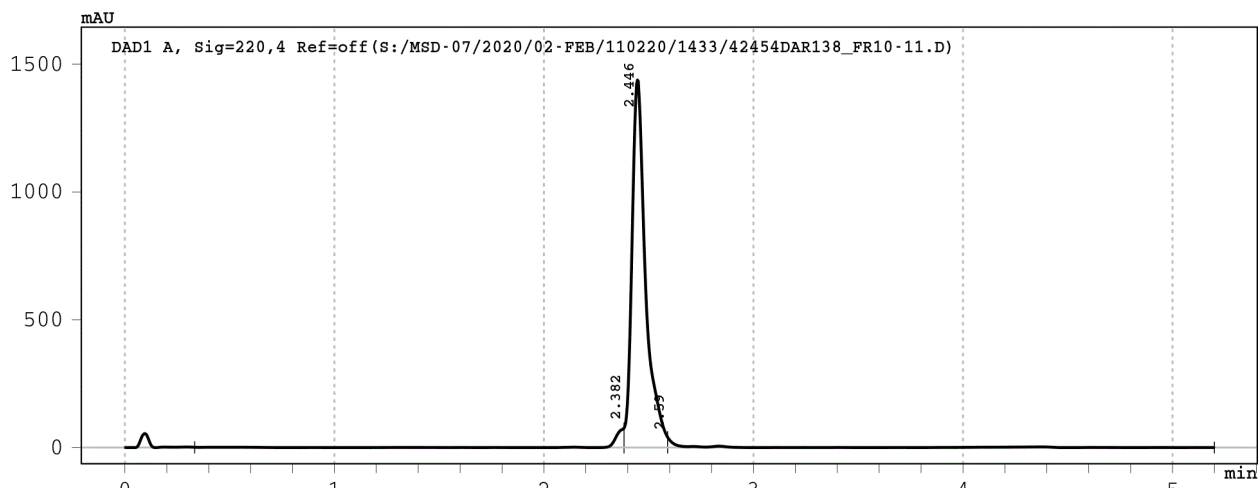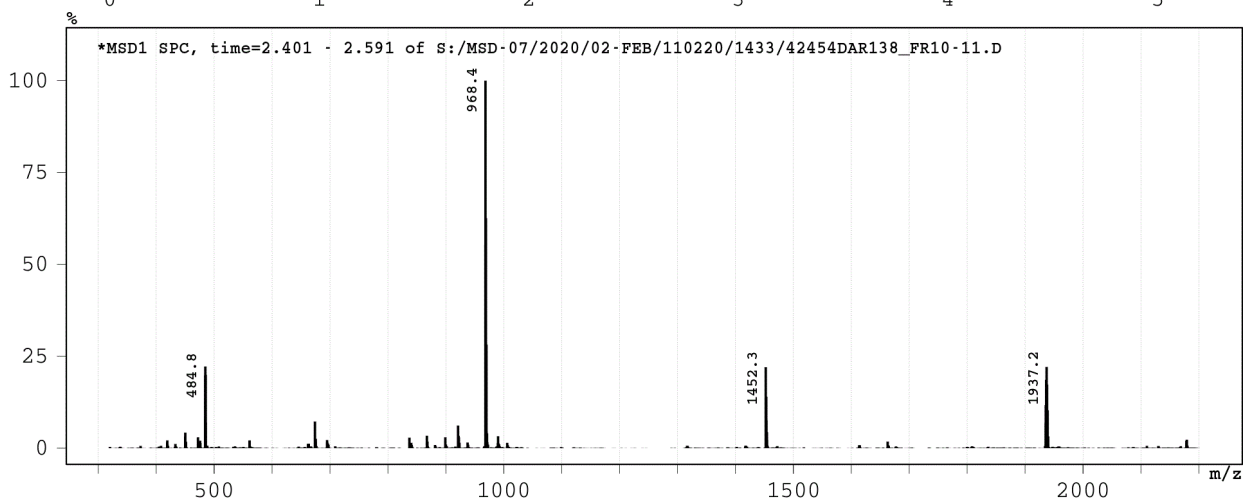

Signal 1: DAD1 A, Sig=220,4 Ref=off

| Peak # | RT [min] | Width [min] | Area   | Area % |
|--------|----------|-------------|--------|--------|
| 1      | 2.382    | 2.05        | 221.2  | 3.2    |
| 2      | 2.446    | 0.21        | 6522.4 | 94.3   |
| 3      | 2.590    | 2.61        | 172.3  | 2.5    |

Data File : S:/MSD-07/2020/02-FEB/060220/1429/42454DAR139\_FR2->



Injection Date : 06-Feb-20, 18:47:18  
Sample Name : 42454DAR139\_FR25-26  
Remarks : Baseline corrected  
Acq. Method : D:/METHODS/5-95-6M.M  
column used : Je\_559  
Analysis Method : C:/CHEM32/1/METHODS/JPT-LCMS.M

Sample Info : 42454\_139-Dr. Martine Darwish H-MALSTYYAL-OH

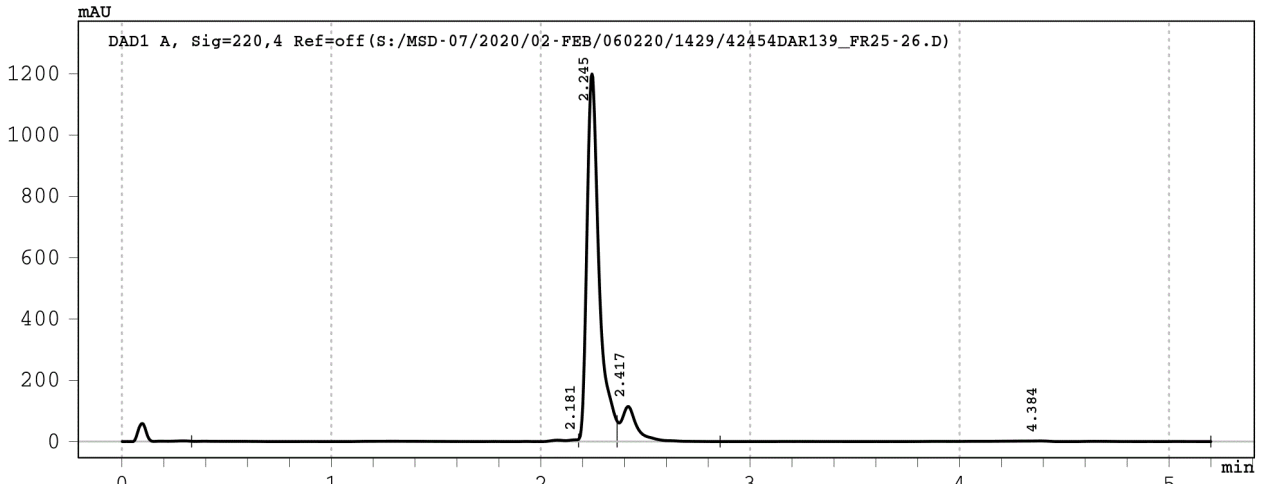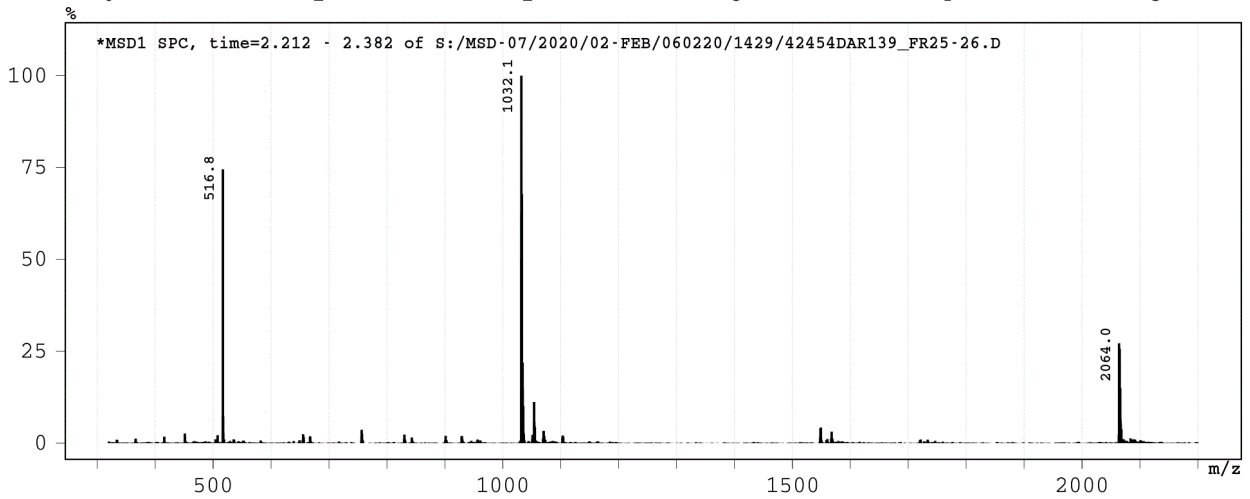

Signal 1: DAD1 A, Sig=220,4 Ref=off

| Peak # | RT [min] | Width [min] | Area   | Area % |
|--------|----------|-------------|--------|--------|
| 1      | 2.181    | 1.85        | 69.4   | 1.2    |
| 2      | 2.245    | 0.18        | 4875.6 | 86.9   |
| 3      | 2.417    | 0.49        | 616.1  | 11.0   |
| 4      | 4.384    | 2.34        | 46.8   | 0.8    |



Inj. Date : 14-Feb-20, 18:09:02  
 Sample Name : 42454DAR140\_FR60-61\_A  
 Column used : Je-2502  
 Remarks : Baseline corrected  
 Acq. Method : D:/METHODS/5-95-6M.M

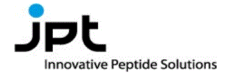

Data File : S:/MSD-07/2020/02-FEB/140220/1435/42454DAR140\_FR6->

Sample Info : 42454\_140-Dr. Martine Darwish  
 H-KGYRHRVPL-OH

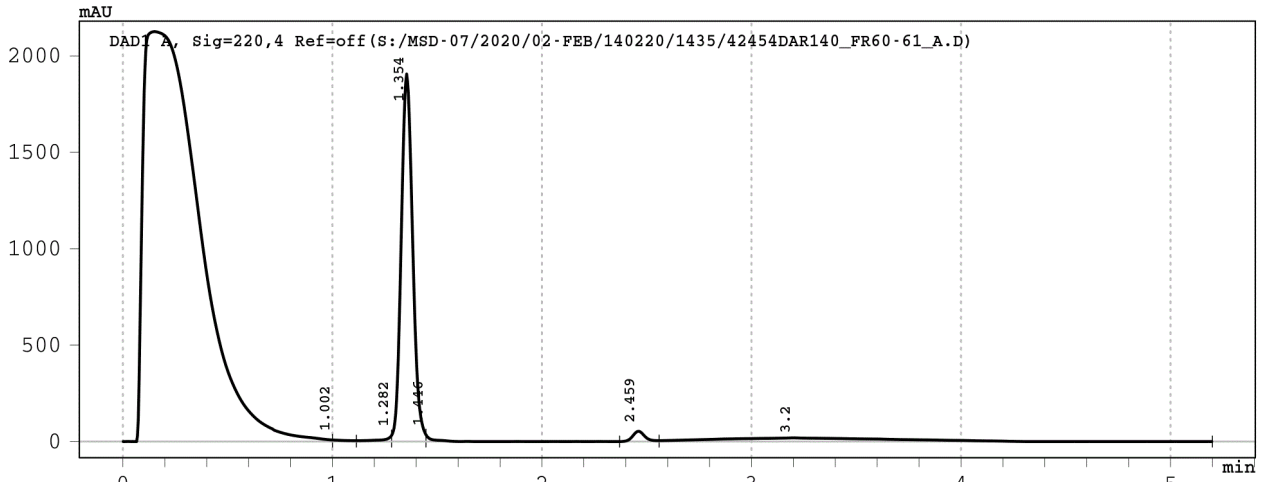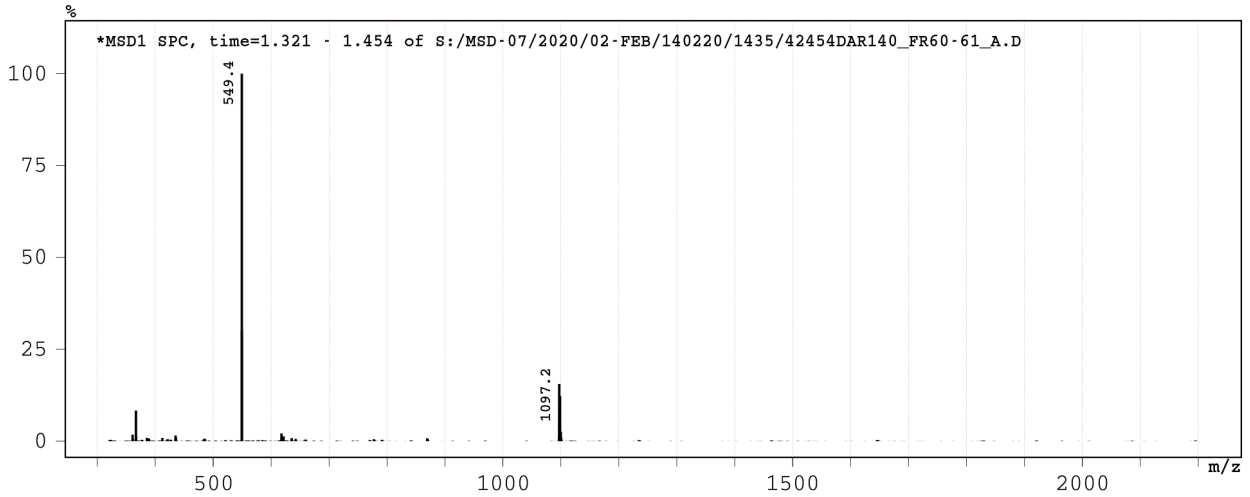

Signal 1: DAD1 A, Sig=220,4 Ref=off

| Peak # | RT [min] | Width [min] | Area   | Area % |
|--------|----------|-------------|--------|--------|
| 1      | 1.002    | 0.11        | 38.7   | 0.4    |
| 2      | 1.282    | 0.17        | 84.5   | 1.0    |
| 3      | 1.354    | 0.16        | 7231.5 | 82.4   |
| 4      | 1.446    | 0.92        | 68.9   | 0.8    |
| 5      | 2.459    | 0.19        | 217.7  | 2.5    |
| 6      | 3.200    | 2.64        | 1129.8 | 12.9   |

Data File : S:/MSD-07/2020/02-FEB/060220/1429/42454DAR141\_FR3->



Injection Date : 06-Feb-20, 18:55:42  
Sample Name : 42454DAR141\_FR36-37  
Remarks : Baseline corrected  
Acq. Method : D:/METHODS/5-95-6M.M  
column used : Je\_559  
Analysis Method : C:/CHEM32/1/METHODS/JPT-LCMS.M

Sample Info : 42454\_141-Dr. Martine Darwish H-INPHWNFEKM-OH

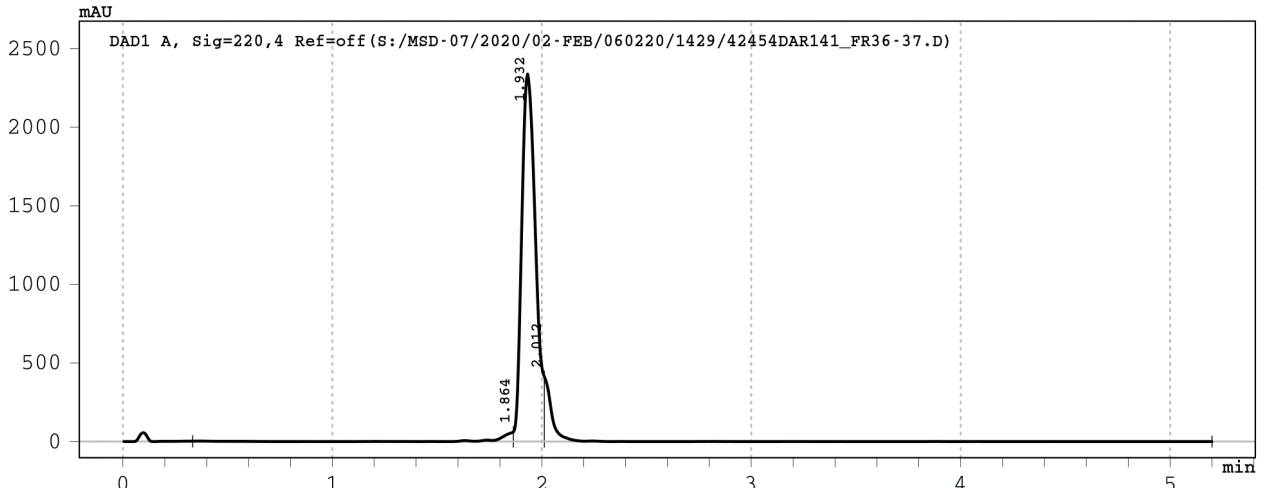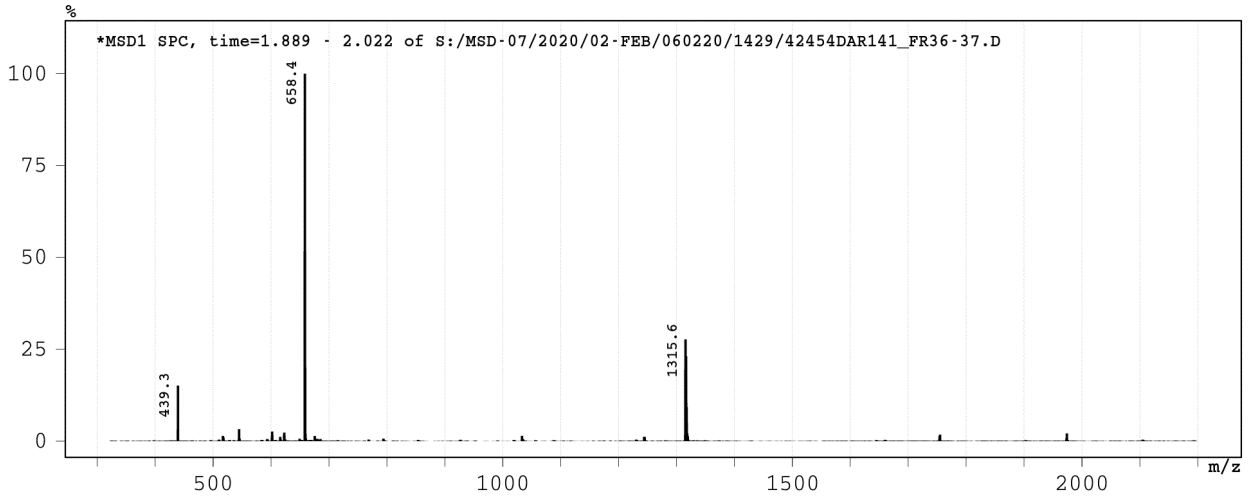

Signal 1: DAD1 A, Sig=220,4 Ref=off

| Peak # | RT [min] | Width [min] | Area    | Area % |
|--------|----------|-------------|---------|--------|
| 1      | 1.864    | 1.53        | 277.2   | 2.3    |
| 2      | 1.932    | 0.15        | 10657.2 | 89.3   |
| 3      | 2.012    | 3.19        | 1006.2  | 8.4    |

Data File : S:/MSD-07/2020/02-FEB/060220/1429/42454DAR142\_FR4->  
 Injection Date : 06-Feb-20, 19:04:07  
 Sample Name : 42454DAR142\_FR47-48  
 Remarks : Baseline corrected  
 Acq. Method : D:/METHODS/5-95-6M.M  
 column used : Je\_559  
 Analysis Method : C:/CHEM32/1/METHODS/JPT-LCMS.M



Sample Info : 42454\_142-Dr. Martine Darwish H-VIYQLCAF-OH

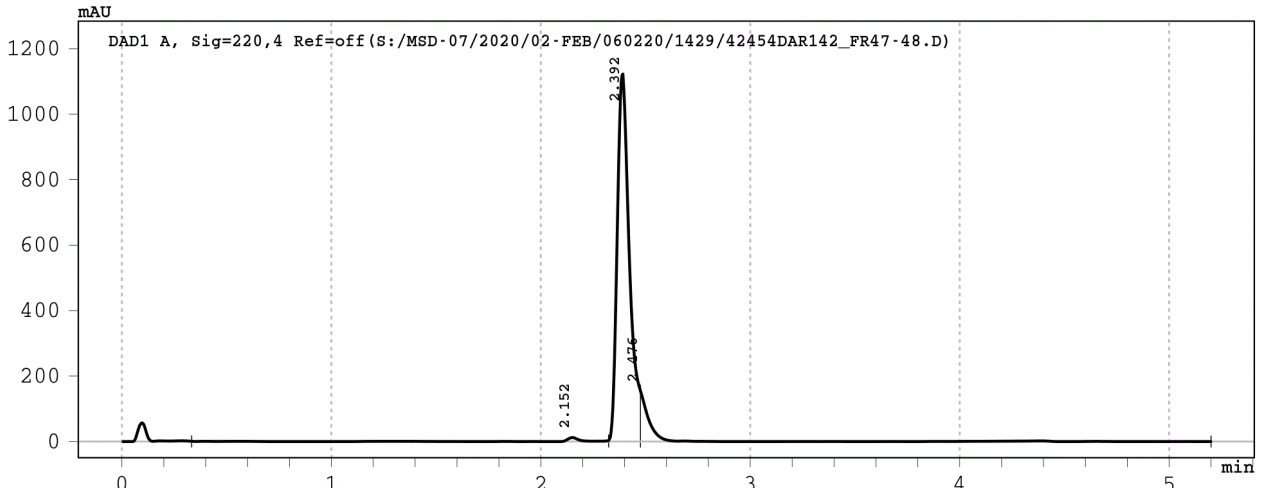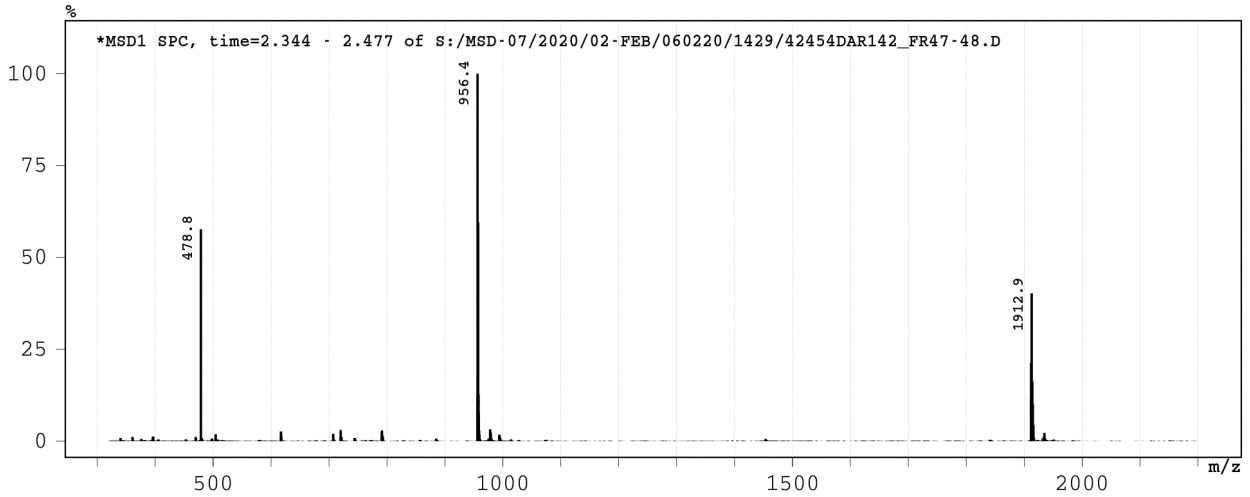

Signal 1: DAD1 A, Sig=220,4 Ref=off

| Peak # | RT [min] | Width [min] | Area   | Area % |
|--------|----------|-------------|--------|--------|
| 1      | 2.152    | 1.99        | 77.8   | 1.5    |
| 2      | 2.392    | 0.15        | 4535.7 | 89.6   |
| 3      | 2.476    | 2.72        | 446.9  | 8.8    |

Data File : S:/MSD-07/2020/02-FEB/060220/1429/42454DAR143\_FR5->  
 Injection Date : 06-Feb-20, 19:12:32  
 Sample Name : 42454DAR143\_FR51-52  
 Remarks : Baseline corrected  
 Acq. Method : D:/METHODS/5-95-6M.M  
 column used : Je\_559  
 Analysis Method : C:/CHEM32/1/METHODS/JPT-LCMS.M



Sample Info : 42454\_143-Dr. Martine Darwish H-ICAVKFLKL-OH

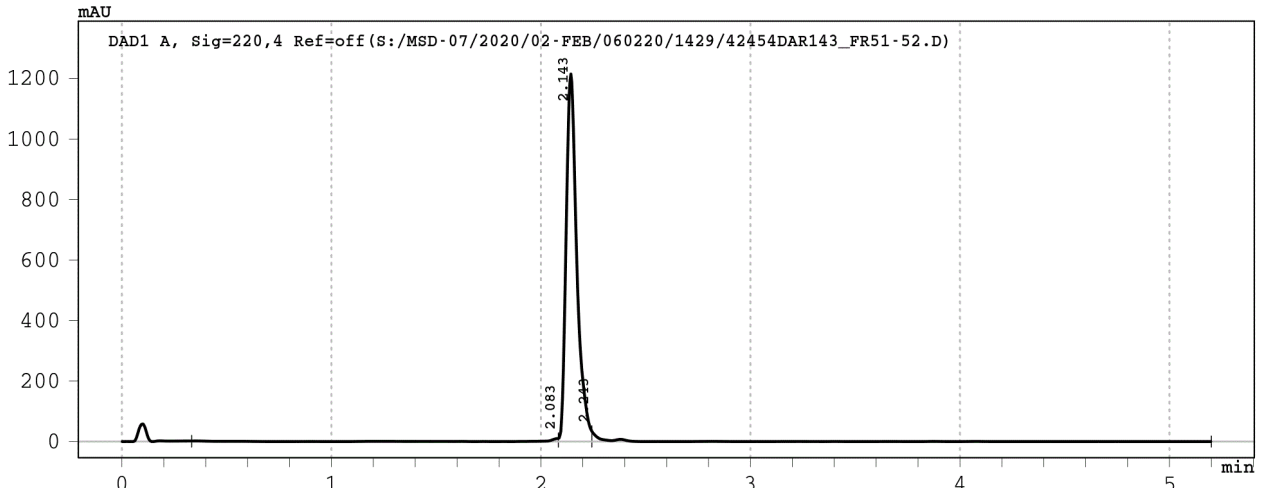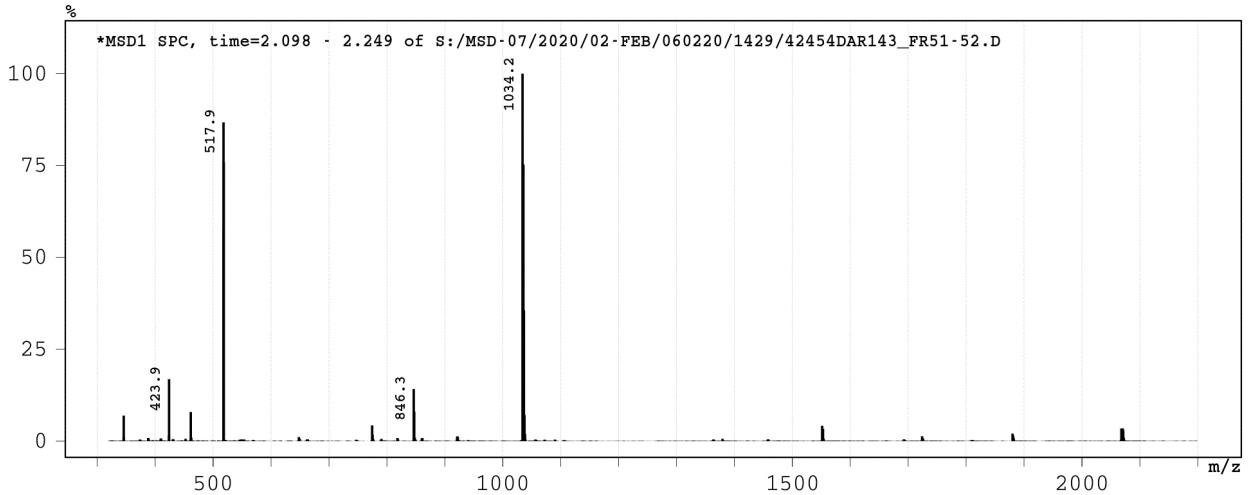

Signal 1: DAD1 A, Sig=220,4 Ref=off

| Peak # | RT [min] | Width [min] | Area   | Area % |
|--------|----------|-------------|--------|--------|
| 1      | 2.083    | 1.75        | 61.0   | 1.4    |
| 2      | 2.143    | 0.16        | 4335.9 | 96.4   |
| 3      | 2.243    | 2.96        | 99.2   | 2.2    |

Data File : S:/MSD-07/2020/02-FEB/140220/1435/42454DAR144\_FR5->



Injection Date : 15-Feb-20, 00:26:49  
Sample Name : 42454DAR144\_FR53  
Remarks : Baseline corrected  
Acq. Method : D:/METHODS/5-95-6M.M  
column used : Je\_559  
Analysis Method : C:/CHEM32/1/METHODS/JPT-LCMS.M

Sample Info : 42454\_144-Dr. Martine Darwish H-TWHEWRYFF-OH

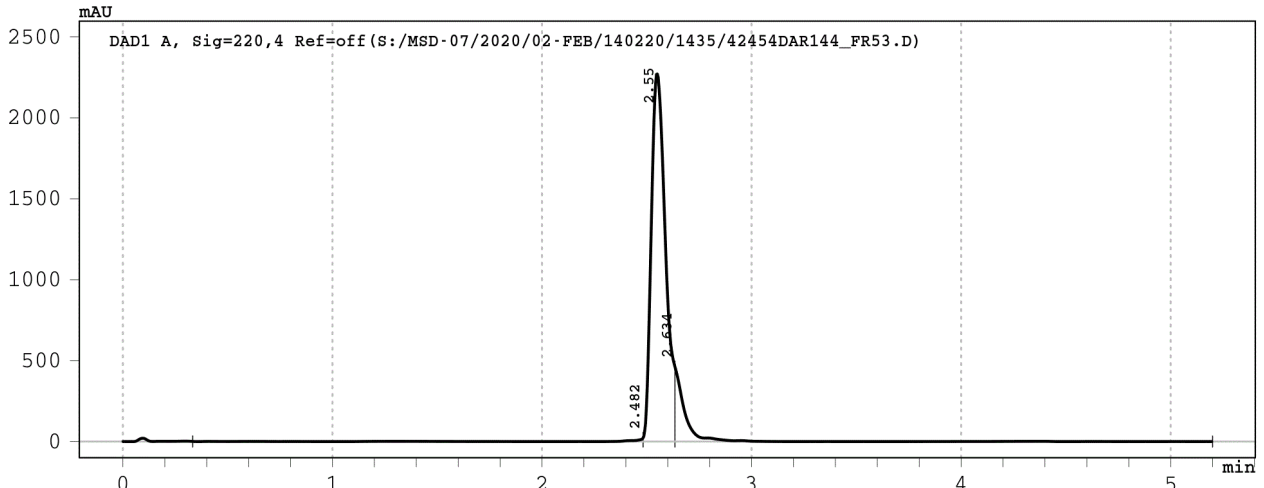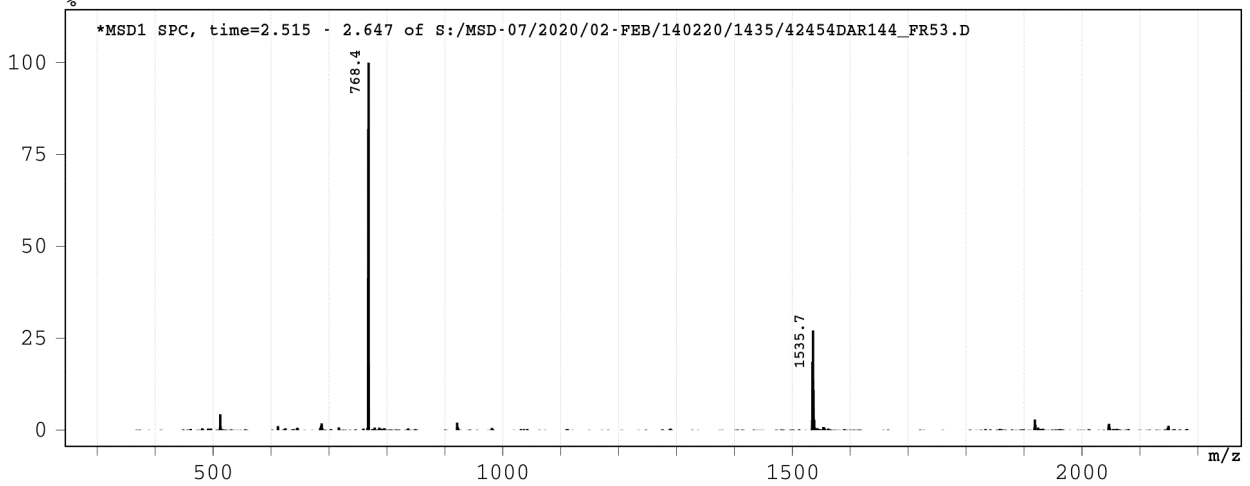

Signal 1: DAD1 A, Sig=220,4 Ref=off

| Peak # | RT [min] | Width [min] | Area    | Area % |
|--------|----------|-------------|---------|--------|
| 1      | 2.482    | 2.15        | 95.8    | 0.8    |
| 2      | 2.550    | 0.15        | 10709.4 | 87.3   |
| 3      | 2.634    | 2.57        | 1463.0  | 11.9   |

Data File : S:/MSD-07/2020/02-FEB/140220/1435/42454DAR145\_FR8->



Injection Date : 15-Feb-20, 00:35:11  
Sample Name : 42454DAR145\_FR81-83  
Remarks : Baseline corrected  
Acq. Method : D:/METHODS/5-95-6M.M  
column used : Je\_559  
Analysis Method : C:/CHEM32/1/METHODS/JPT-LCMS.M

Sample Info : 42454\_145-Dr. Martine Darwish H-IILETIWL-OH

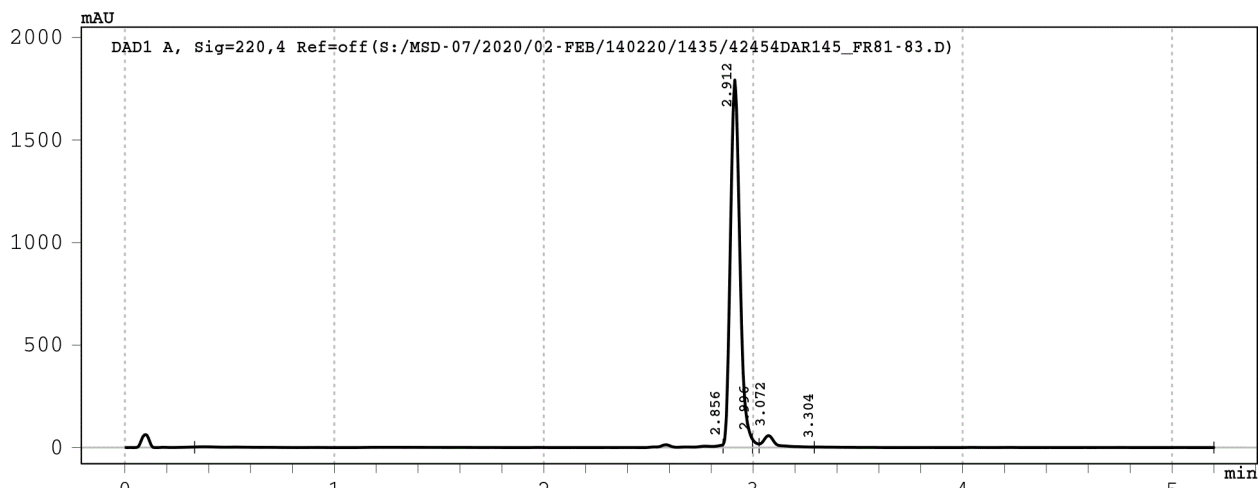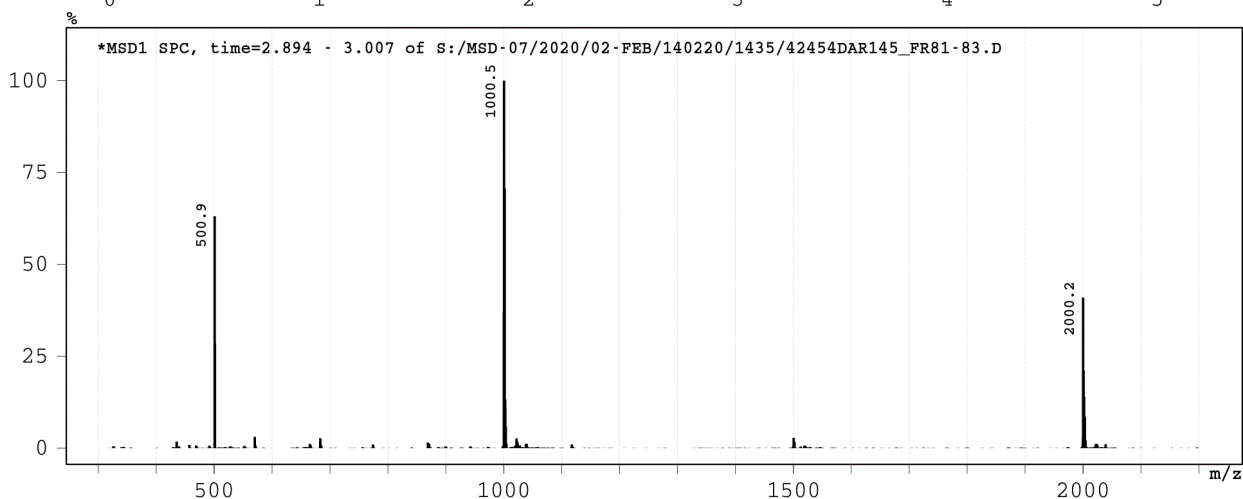

Signal 1: DAD1 A, Sig=220,4 Ref=off

| Peak # | RT [min] | Width [min] | Area   | Area % |
|--------|----------|-------------|--------|--------|
| 1      | 2.856    | 2.52        | 191.3  | 3.1    |
| 2      | 2.912    | 0.14        | 5619.2 | 91.6   |
| 3      | 2.996    | 0.03        | 47.8   | 0.8    |
| 4      | 3.072    | 0.26        | 246.1  | 4.0    |
| 5      | 3.304    | 1.91        | 31.4   | 0.5    |

Data File : S:/MSD-07/2020/02-FEB/140220/1435/42454DAR146\_FR2->



Injection Date : 15-Feb-20, 00:43:33  
Sample Name : 42454DAR146\_FR2-4  
Remarks : Baseline corrected  
Acq. Method : D:/METHODS/5-95-6M.M  
column used : Je\_559  
Analysis Method : C:/CHEM32/1/METHODS/JPT-LCMS.M

Sample Info : 42454\_146-Dr. Martine Darwish H-SASTNPNAM-OH

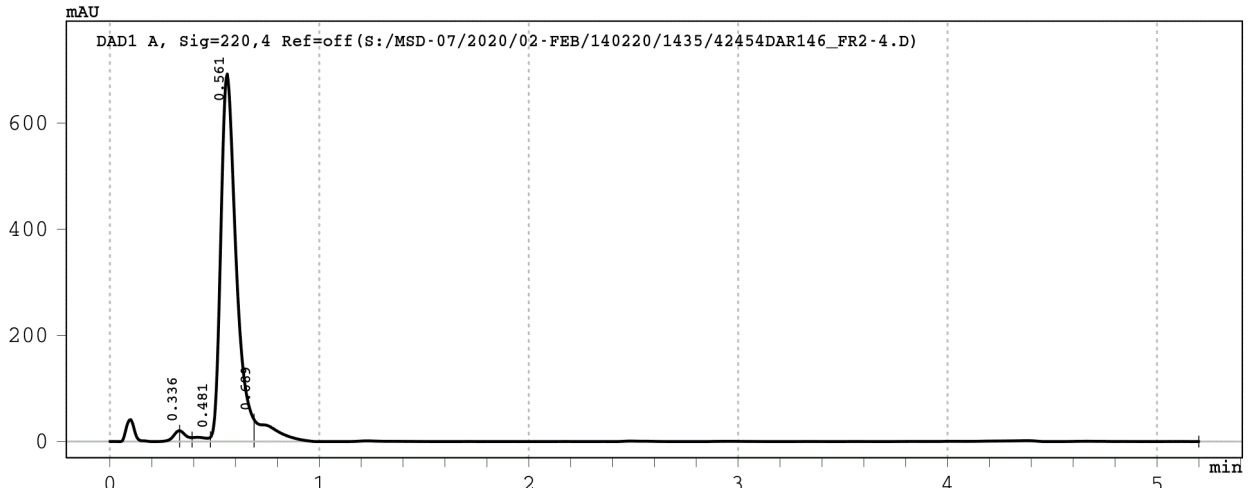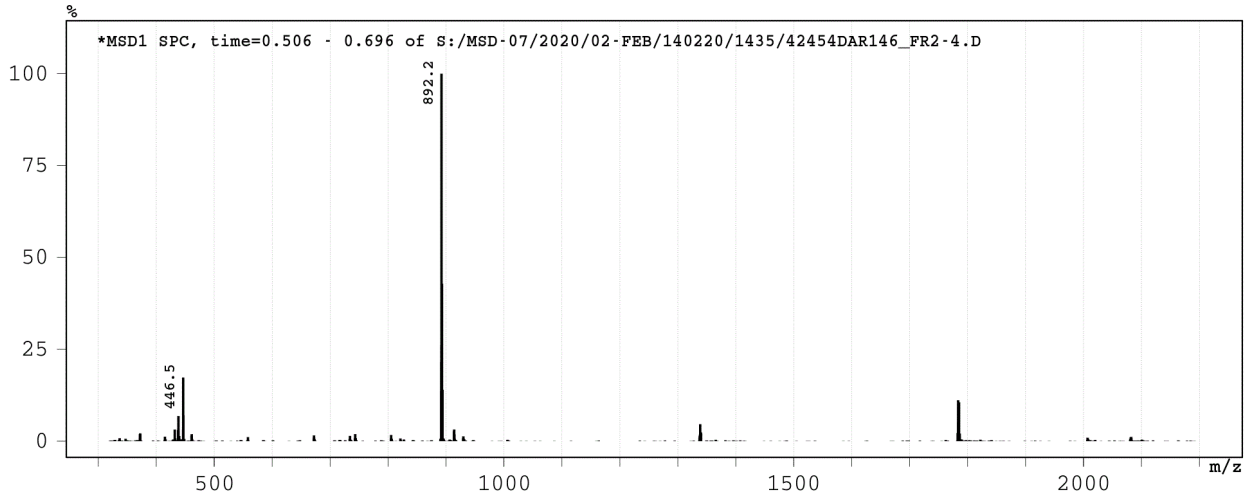

Signal 1: DAD1 A, Sig=220,4 Ref=off

| Peak # | RT [min] | Width [min] | Area   | Area % |
|--------|----------|-------------|--------|--------|
| 1      | 0.336    | 0.06        | 40.5   | 1.0    |
| 2      | 0.481    | 0.09        | 38.2   | 1.0    |
| 3      | 0.561    | 0.21        | 3497.7 | 89.6   |
| 4      | 0.689    | 4.51        | 327.5  | 8.4    |

Data File : S:/MSD-07/2020/02-FEB/070220/1430/42454DAR147\_FR5->  
 Injection Date : 07-Feb-20, 18:48:25  
 Sample Name : 42454DAR147\_FR5-6  
 Remarks : Baseline corrected  
 Acq. Method : D:/METHODS/5-95-6M.M  
 column used : Je\_559  
 Analysis Method : C:/CHEM32/1/METHODS/JPT-LCMS.M



Sample Info : 42454\_147-Dr. Martine Darwish H-KGYFFNKGTL-OH

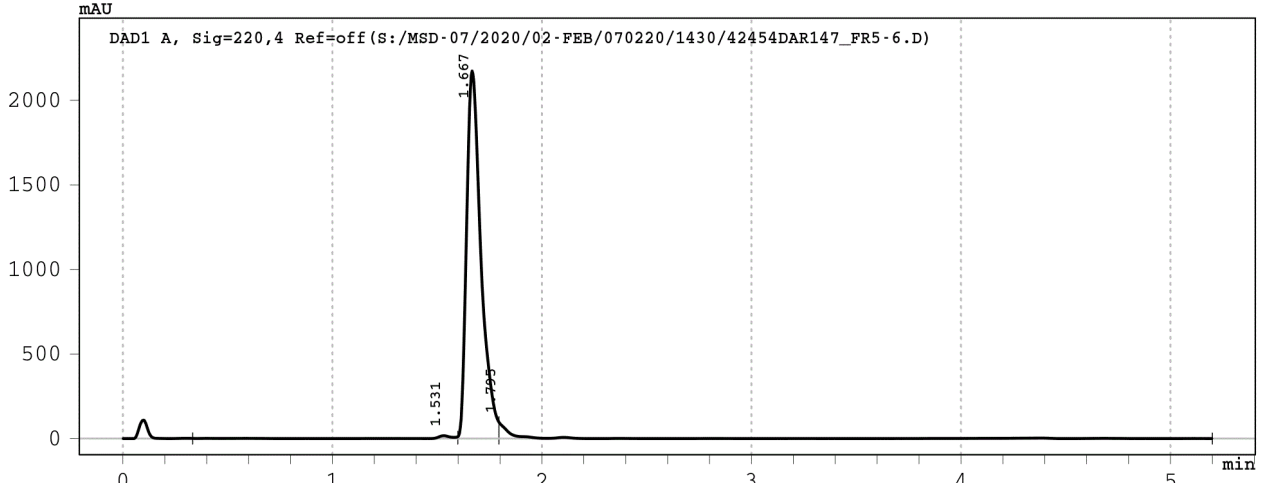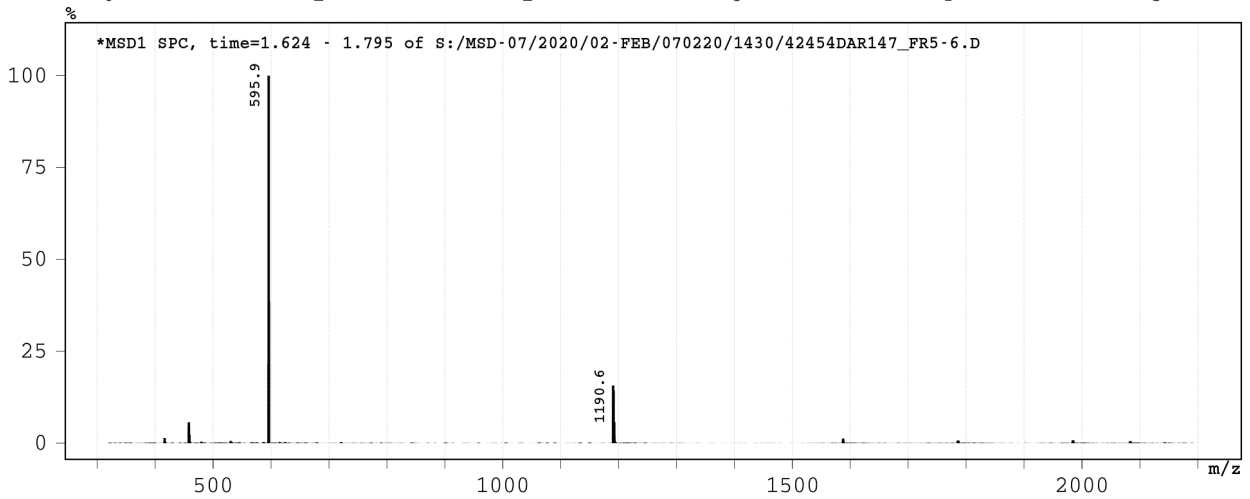

Signal 1: DAD1 A, Sig=220,4 Ref=off

| Peak # | RT [min] | Width [min] | Area    | Area % |
|--------|----------|-------------|---------|--------|
| 1      | 1.531    | 1.27        | 89.1    | 0.8    |
| 2      | 1.667    | 0.20        | 10377.3 | 95.5   |
| 3      | 1.795    | 3.41        | 397.0   | 3.7    |



Data File : S:/MSD-07/2020/02-FEB/070220/1430/42454DAR148\_FR1->



Injection Date : 07-Feb-20, 18:56:49  
Sample Name : 42454DAR148\_FR17  
Remarks : Baseline corrected  
Acq. Method : D:/METHODS/5-95-6M.M  
column used : Je\_559  
Analysis Method : C:/CHEM32/1/METHODS/JPT-LCMS.M

Sample Info : 42454\_148-Dr. Martine Darwish H-VRFSLPSHL-OH

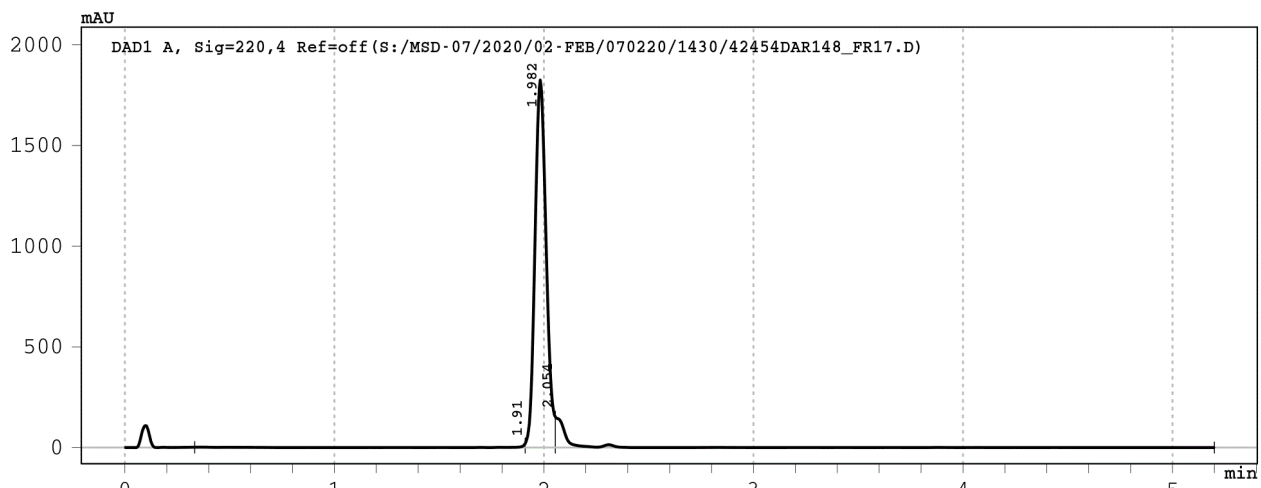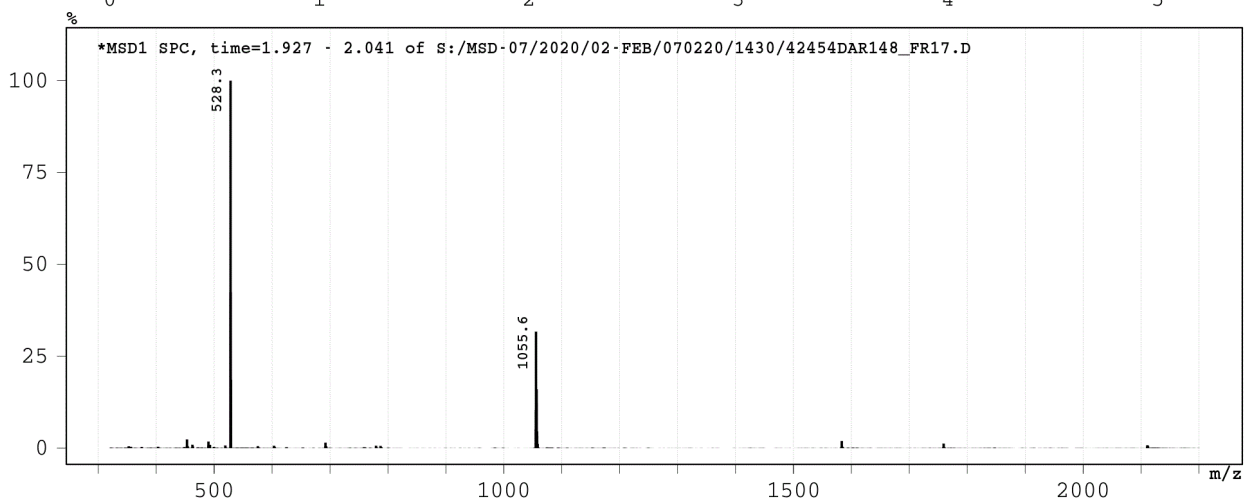

Signal 1: DAD1 A, Sig=220,4 Ref=off

| Peak # | RT [min] | Width [min] | Area   | Area % |
|--------|----------|-------------|--------|--------|
| 1      | 1.910    | 1.58        | 47.1   | 0.6    |
| 2      | 1.982    | 0.14        | 6783.1 | 92.2   |
| 3      | 2.054    | 3.15        | 524.0  | 7.1    |

Data File : S:/MSD-07/2020/02-FEB/070220/1430/42454DAR149\_FR3 ->



Injection Date : 07-Feb-20, 19:05:14  
Sample Name : 42454DAR149\_FR31-32  
Remarks : Baseline corrected  
Acq. Method : D:/METHODS/5-95-6M.M  
column used : Je\_559  
Analysis Method : C:/CHEM32/1/METHODS/JPT-LCMS.M

Sample Info : 42454\_149-Dr. Martine Darwish H-CWYLALVSAL-OH

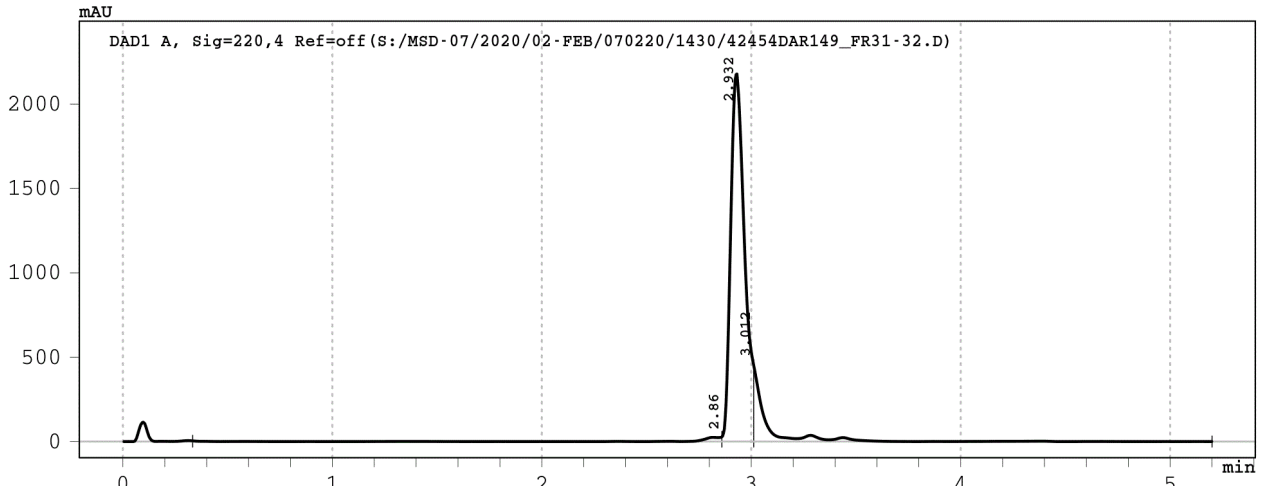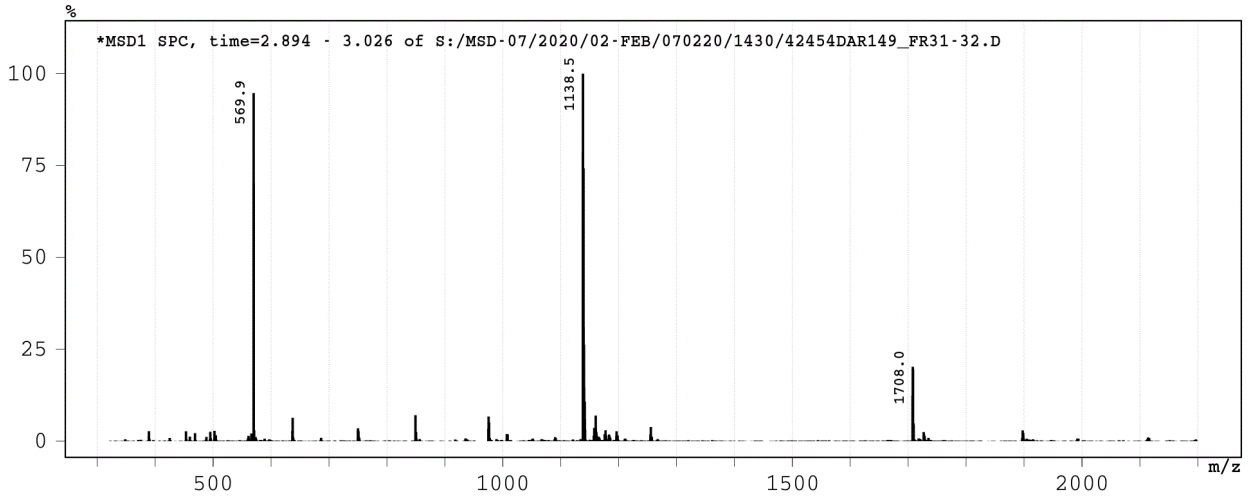

Signal 1: DAD1 A, Sig=220,4 Ref=off

| Peak # | RT [min] | Width [min] | Area    | Area % |
|--------|----------|-------------|---------|--------|
| 1      | 2.860    | 2.53        | 172.2   | 1.5    |
| 2      | 2.932    | 0.15        | 10018.0 | 84.6   |
| 3      | 3.012    | 2.19        | 1653.6  | 14.0   |

Data File: S:\MSD-07\2020\02-FEB\070220\143->

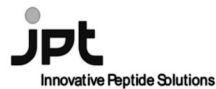

Injection Date : Fri, 7. Feb. 2020  
Sample Name : 240120SG2-72|42454Dar150  
Acq Operator : SYSTEM  
Acq. Method : D:\Data\2020\02-FEB\070220\1430\5-95-6M.M  
column used :  
Analysis Method : C:\Chem32\1\METHODS\DEF\_LC.M

Sample Info : 42454\_150-Dr. Martine Darwish|H-SSPSFAKI-OH

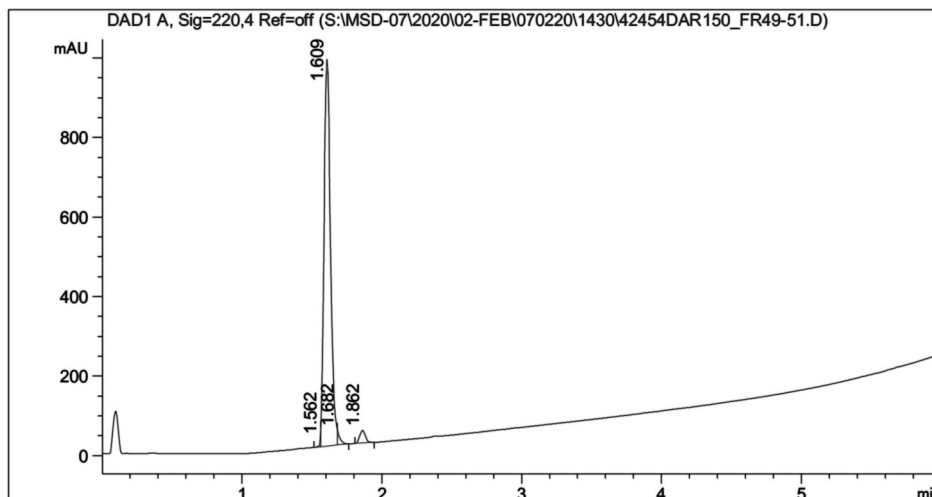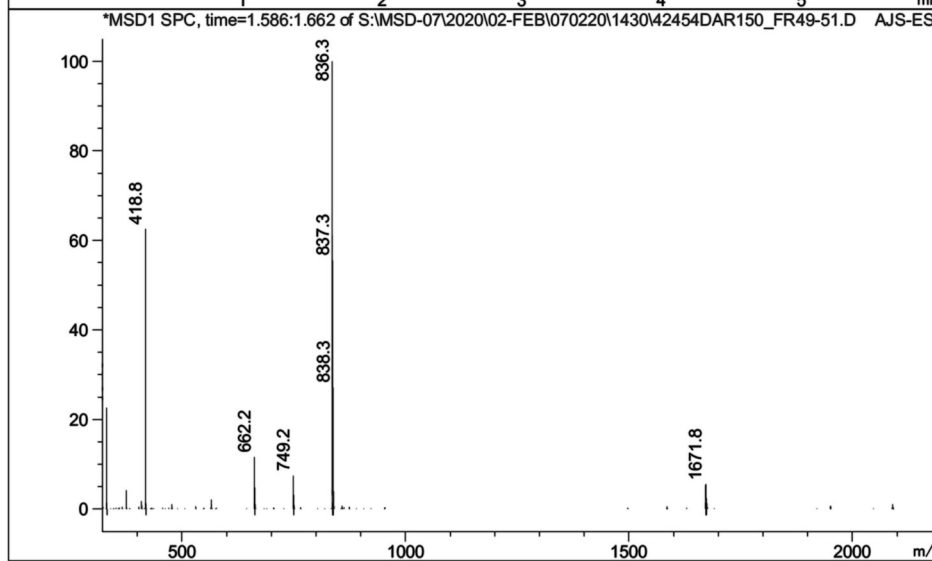

Signal 1: DAD1 A, Sig=220,4 Ref=off

| Peak # | RT [min] | Width [min] | Area   | Area % |
|--------|----------|-------------|--------|--------|
| 1      | 1.562    | 0.0         | 30.0   | 0.9    |
| 2      | 1.609    | 0.1         | 3102.6 | 95.1   |
| 3      | 1.682    | 0.0         | 41.3   | 1.3    |
| 4      | 1.862    | 0.0         | 89.4   | 2.7    |

=====  
\*\*\* End of Report \*\*\*

Data File : S:/MSD-07/2020/02-FEB/060220/1429/42454DAR151\_FR5->  
 Injection Date : 06-Feb-20, 19:20:54  
 Sample Name : 42454DAR151\_FR58-59  
 Remarks : Baseline corrected  
 Acq. Method : D:/METHODS/5-95-6M.M  
 column used : Je\_559  
 Analysis Method : C:/CHEM32/1/METHODS/JPT-LCMS.M



Sample Info : 42454\_151-Dr. Martine Darwish H-SSPGFCNTFL-OH

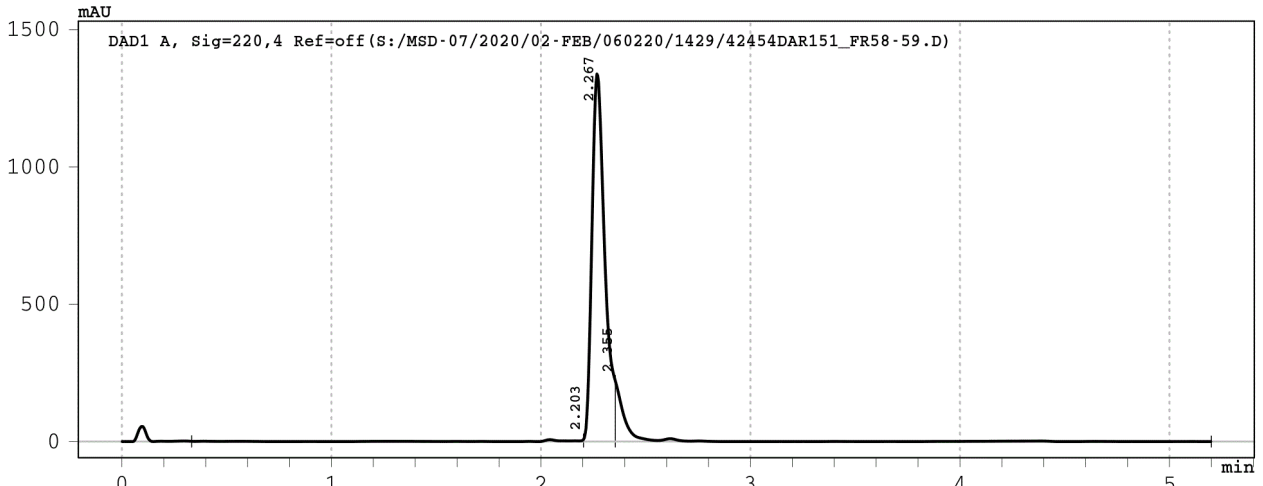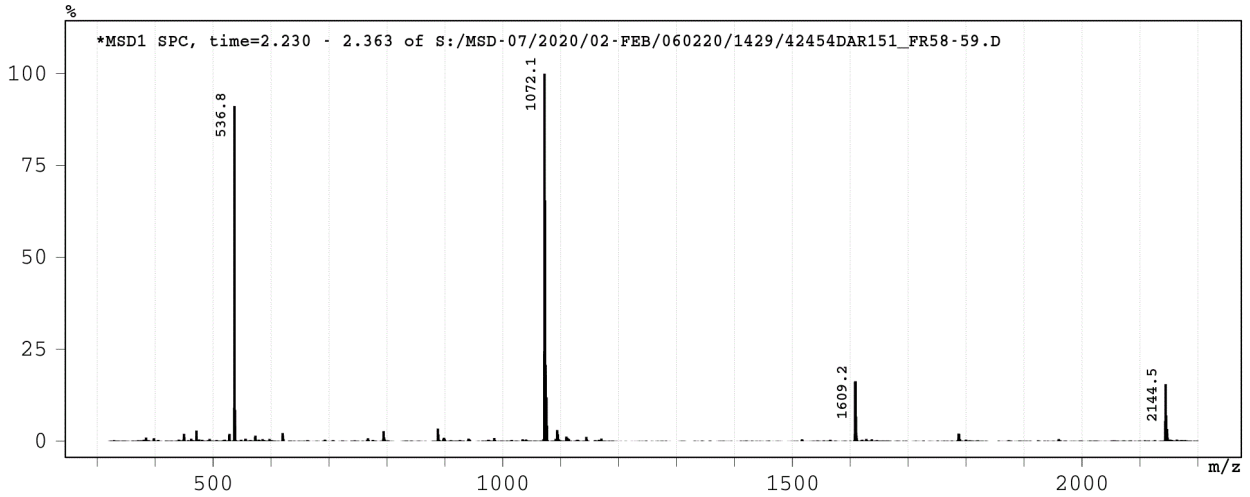

Signal 1: DAD1 A, Sig=220,4 Ref=off

| Peak # | RT [min] | Width [min] | Area   | Area % |
|--------|----------|-------------|--------|--------|
| 1      | 2.203    | 1.87        | 73.4   | 1.1    |
| 2      | 2.267    | 0.15        | 5713.6 | 88.1   |
| 3      | 2.355    | 2.84        | 701.2  | 10.8   |

Data File : S:/MSD-07/2020/02-FEB/110220/1433/42454DAR152\_FR1 ->



Injection Date : 12-Feb-20, 00:52:04  
Sample Name : 42454DAR152\_FR19  
Remarks : Baseline corrected  
Acq. Method : D:/METHODS/5-95-6M.M  
column used : Je\_559  
Analysis Method : C:/CHEM32/1/METHODS/JPT-LCMS.M

Sample Info : 42454\_152-Dr. Martine Darwish H-FSLQFALL-OH

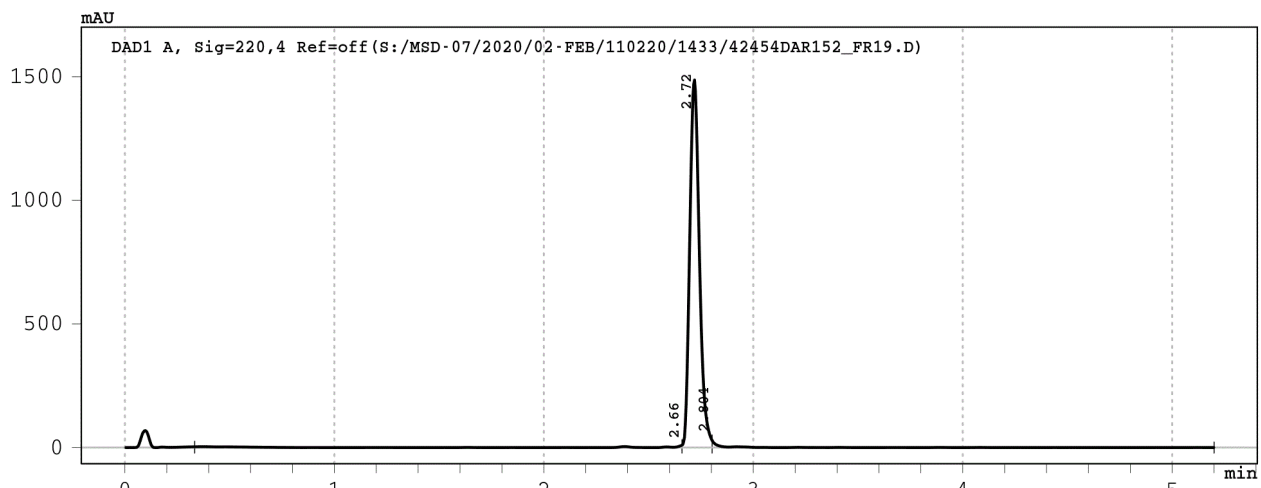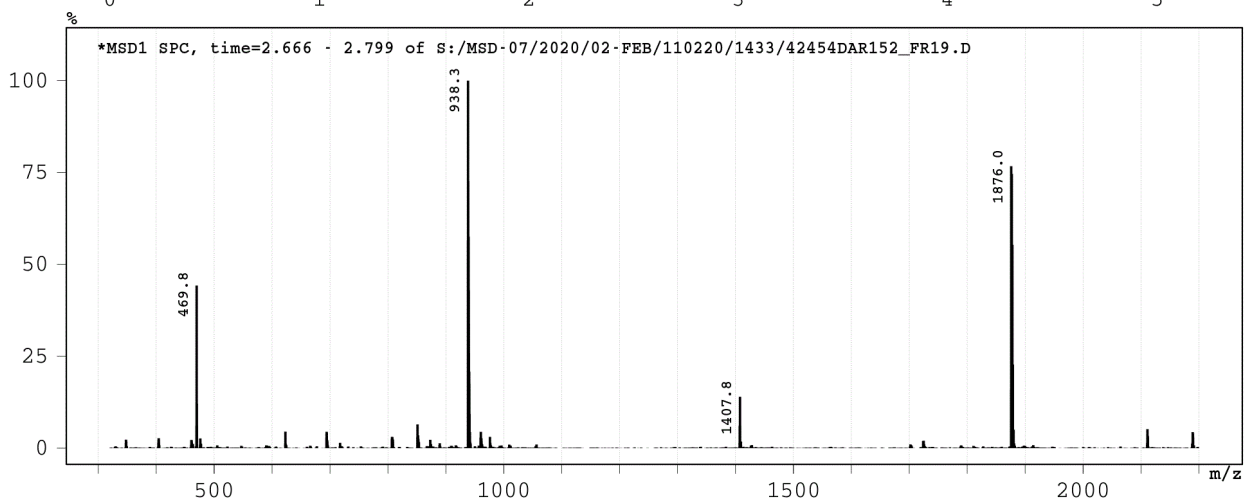

Signal 1: DAD1 A, Sig=220,4 Ref=off

| Peak # | RT [min] | Width [min] | Area   | Area % |
|--------|----------|-------------|--------|--------|
| 1      | 2.660    | 2.33        | 85.2   | 1.7    |
| 2      | 2.720    | 0.14        | 4775.8 | 96.9   |
| 3      | 2.804    | 2.40        | 66.2   | 1.3    |

Data File : S:/MSD-07/2020/02-FEB/110220/1433/42454DAR153\_FR2->



Injection Date : 12-Feb-20, 01:00:30  
Sample Name : 42454DAR153\_FR26-27  
Remarks : Baseline corrected  
Acq. Method : D:/METHODS/5-95-6M.M  
column used : Je\_559  
Analysis Method : C:/CHEM32/1/METHODS/JPT-LCMS.M

Sample Info : 42454\_153-Dr. Martine Darwish H-SSMVPSAL-OH

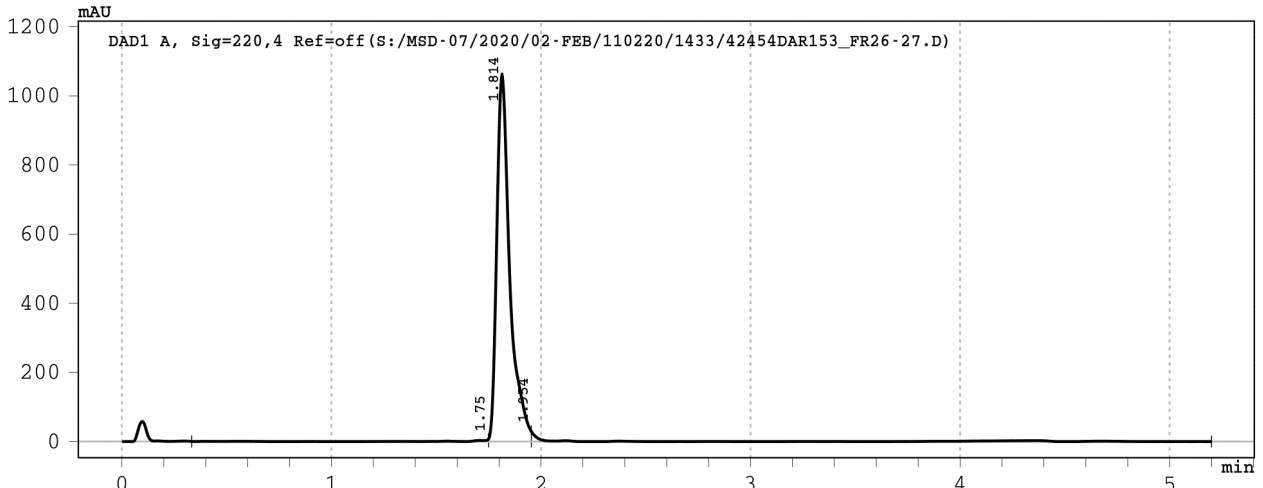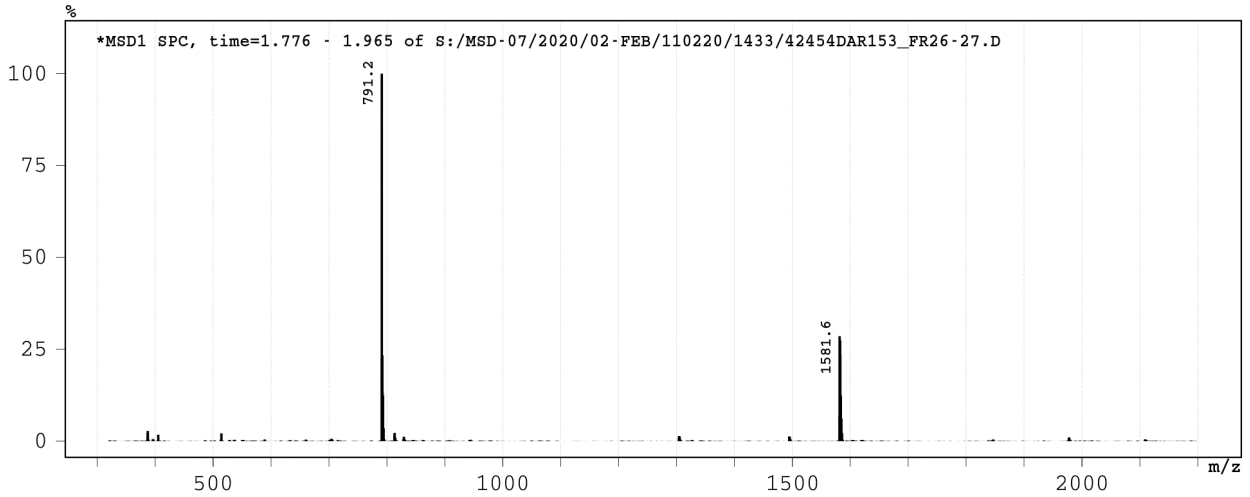

Signal 1: DAD1 A, Sig=220,4 Ref=off

| Peak # | RT [min] | Width [min] | Area   | Area % |
|--------|----------|-------------|--------|--------|
| 1      | 1.750    | 1.42        | 34.4   | 0.7    |
| 2      | 1.814    | 0.20        | 4597.2 | 96.3   |
| 3      | 1.954    | 3.25        | 140.1  | 2.9    |

Data File : S:/MSD-07/2020/02-FEB/070220/1430/42454DAR154\_FR5->  
 Injection Date : 07-Feb-20, 19:22:01  
 Sample Name : 42454DAR154\_FR54  
 Remarks : Baseline corrected  
 Acq. Method : D:/METHODS/5-95-6M.M  
 column used : Je\_559  
 Analysis Method : C:/CHEM32/1/METHODS/JPT-LCMS.M



Sample Info : 42454\_154-Dr. Martine Darwish H-YSGANATAT-OH

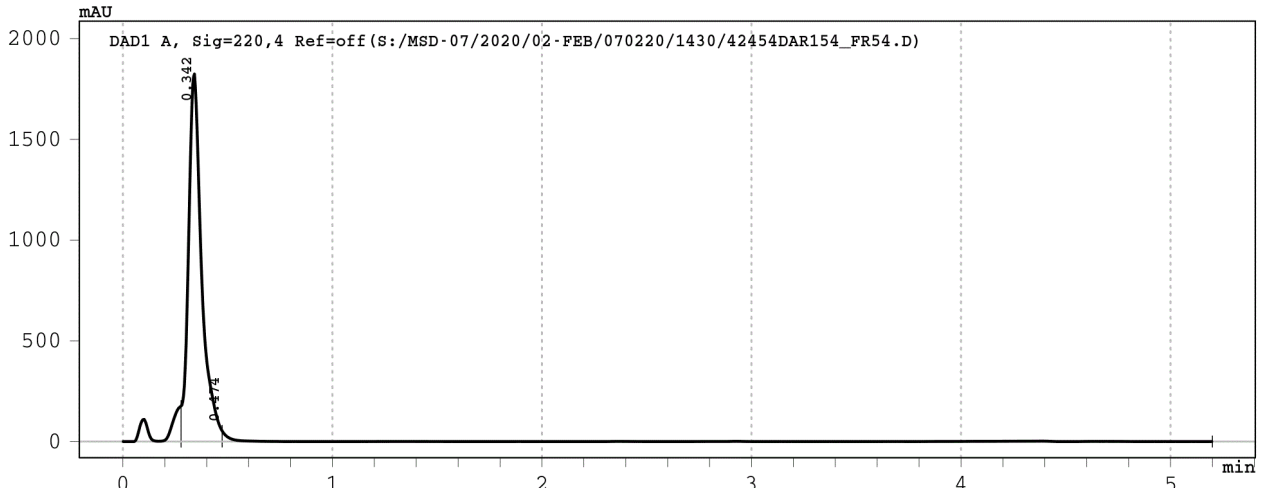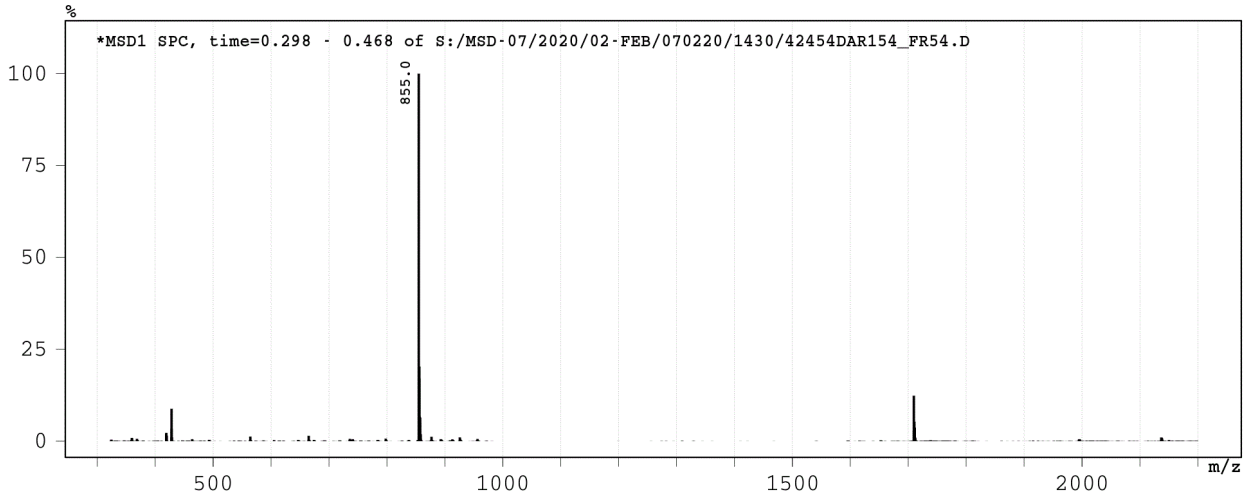

Signal 1: DAD1 A, Sig=220,4 Ref=off

| Peak # | RT [min] | Width [min] | Area   | Area % |
|--------|----------|-------------|--------|--------|
| 1      | 0.342    | 0.20        | 7968.3 | 97.7   |
| 2      | 0.474    | 4.73        | 184.4  | 2.3    |

Data File : S:/MSD-07/2020/02-FEB/060220/1429/42454DAR155\_FR6->



Injection Date : 06-Feb-20, 19:29:17  
Sample Name : 42454DAR155\_FR69-70  
Remarks : Baseline corrected  
Acq. Method : D:/METHODS/5-95-6M.M  
column used : Je\_559  
Analysis Method : C:/CHEM32/1/METHODS/JPT-LCMS.M

Sample Info : 42454\_155-Dr. Martine Darwish H-ASLPMGYI-OH

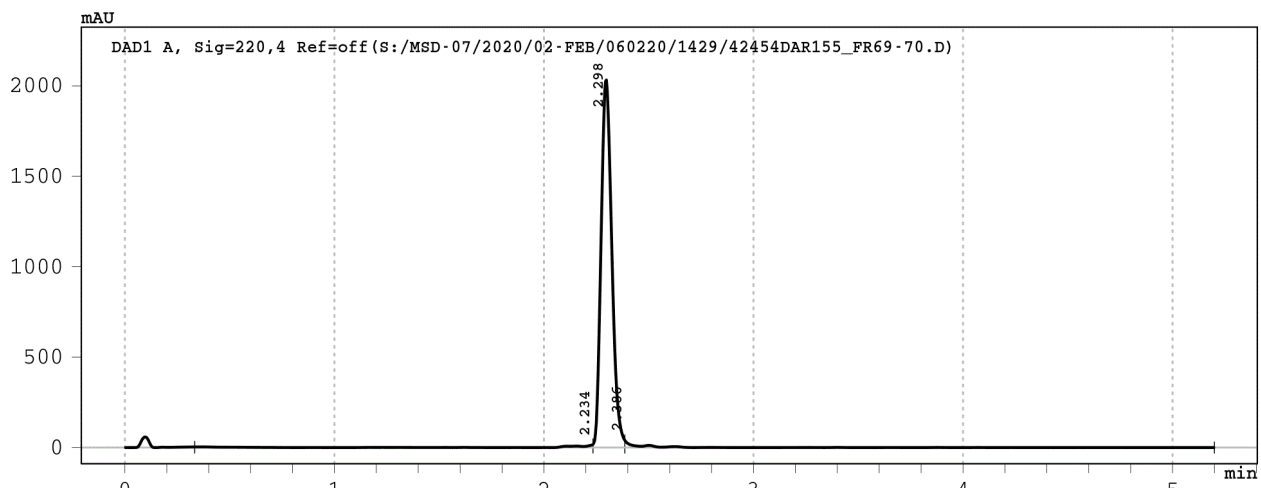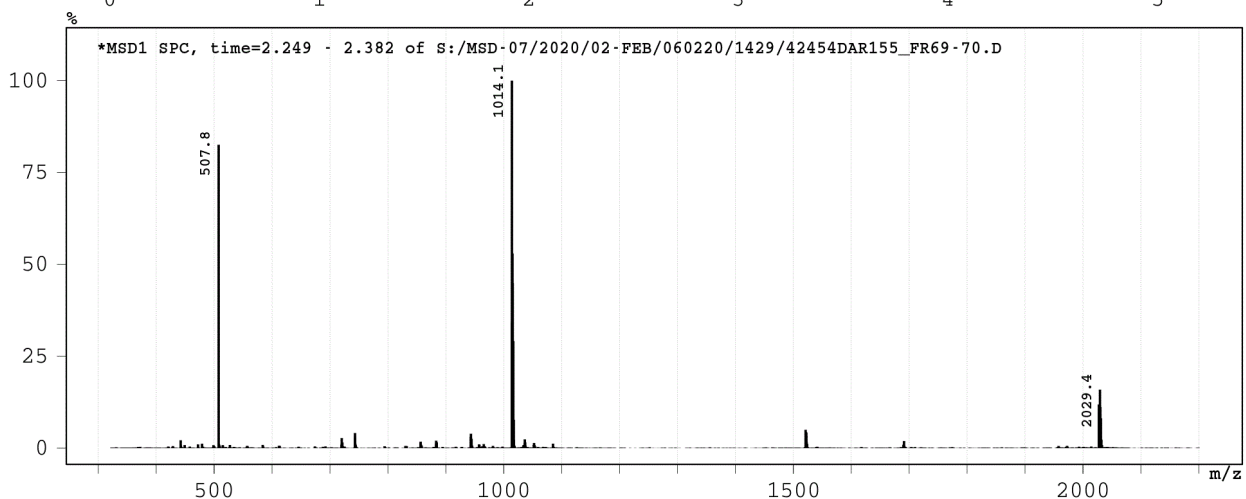

Signal 1: DAD1 A, Sig=220,4 Ref=off

| Peak # | RT [min] | Width [min] | Area   | Area % |
|--------|----------|-------------|--------|--------|
| 1      | 2.234    | 1.90        | 137.7  | 1.8    |
| 2      | 2.298    | 0.15        | 7243.8 | 96.2   |
| 3      | 2.386    | 2.81        | 148.4  | 2.0    |



Data File : S:/MSD-07/2020/02-FEB/070220/1430/42454DAR156\_FR5->  
 Injection Date : 07-Feb-20, 19:30:24  
 Sample Name : 42454DAR156\_FR59  
 Remarks : Baseline corrected  
 Acq. Method : D:/METHODS/5-95-6M.M  
 column used : Je\_559  
 Analysis Method : C:/CHEM32/1/METHODS/JPT-LCMS.M



Sample Info : 42454\_156-Dr. Martine Darwish H-RNRRIFALL-OH

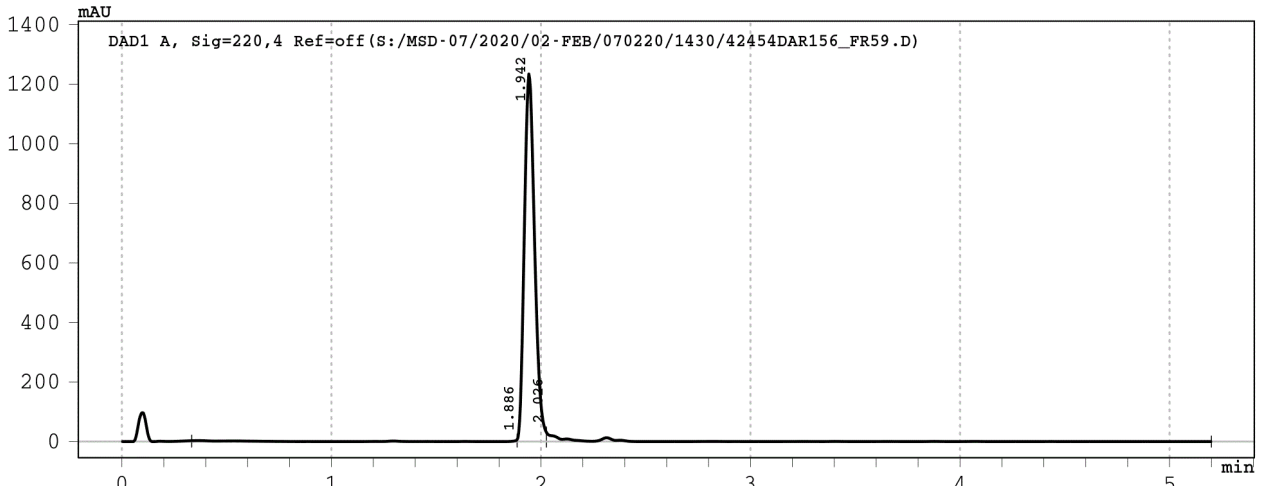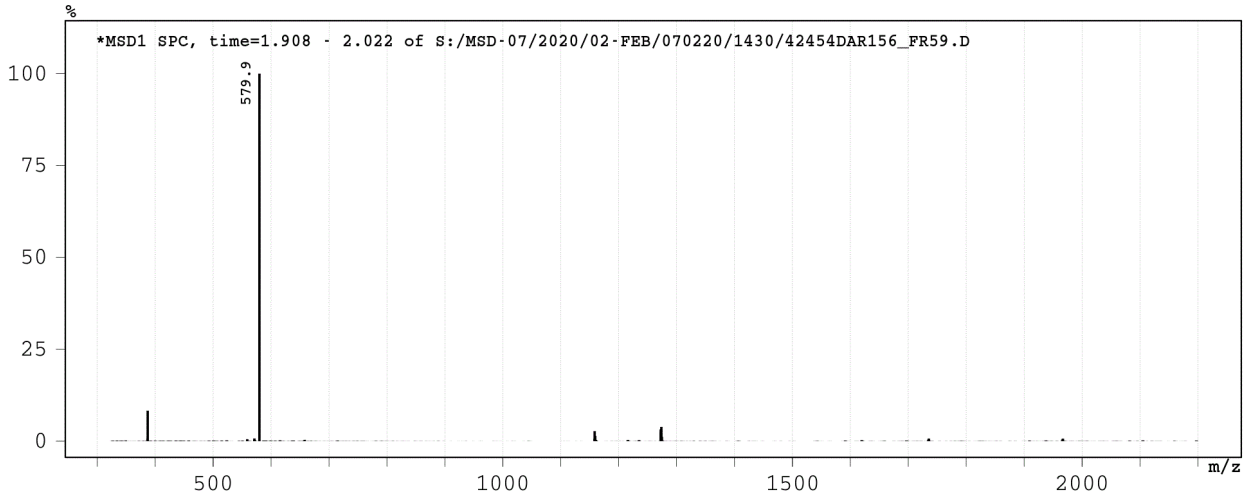

Signal 1: DAD1 A, Sig=220,4 Ref=off

| Peak # | RT [min] | Width [min] | Area   | Area % |
|--------|----------|-------------|--------|--------|
| 1      | 1.886    | 1.55        | 57.3   | 1.3    |
| 2      | 1.942    | 0.14        | 4210.2 | 94.7   |
| 3      | 2.026    | 3.17        | 178.4  | 4.0    |

Data File : S:/MSD-07/2020/02-FEB/070220/1430/42454DAR157\_FR6->  
 Injection Date : 07-Feb-20, 19:38:48  
 Sample Name : 42454DAR157\_FR69-70  
 Remarks : Baseline corrected  
 Acq. Method : D:/METHODS/5-95-6M.M  
 column used : Je\_559  
 Analysis Method : C:/CHEM32/1/METHODS/JPT-LCMS.M



Sample Info : 42454\_157-Dr. Martine Darwish H-VRYVYGGI-OH

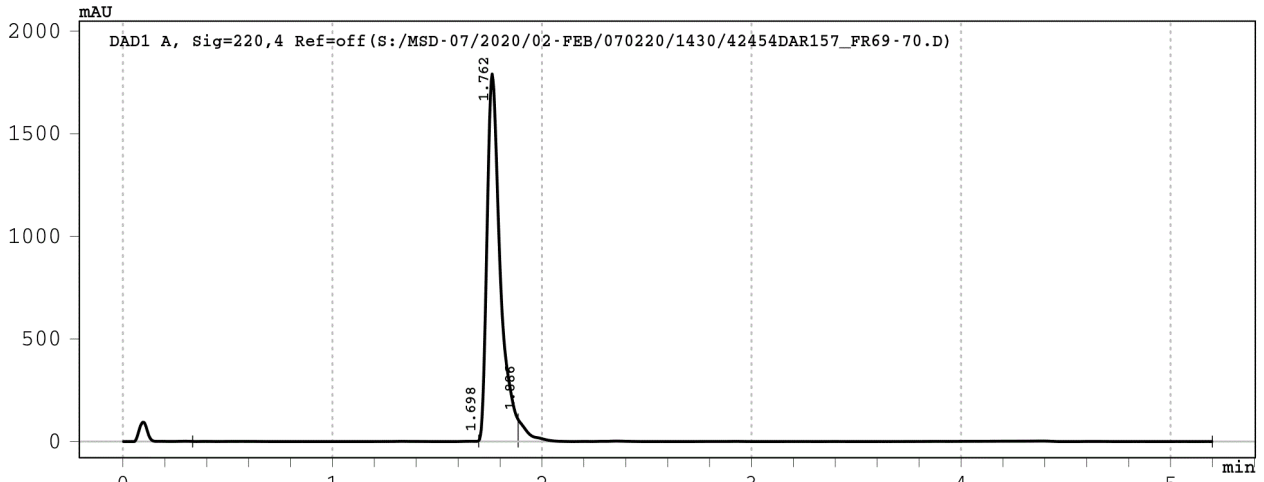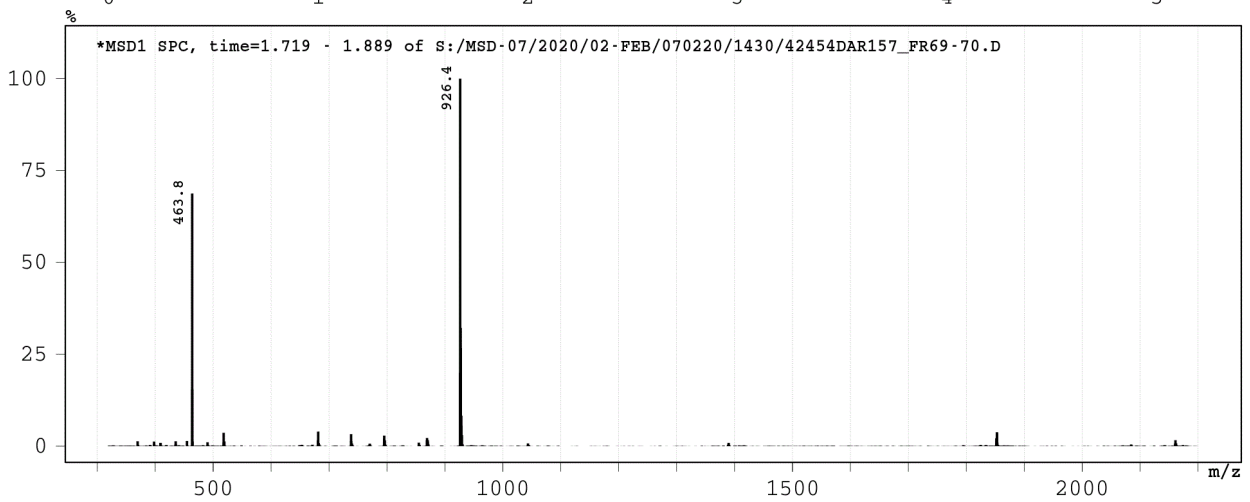

Signal 1: DAD1 A, Sig=220,4 Ref=off

| Peak # | RT [min] | Width [min] | Area   | Area % |
|--------|----------|-------------|--------|--------|
| 1      | 1.698    | 1.37        | 23.4   | 0.3    |
| 2      | 1.762    | 0.19        | 7855.0 | 94.7   |
| 3      | 1.886    | 3.31        | 420.0  | 5.1    |

Data File : S:/MSD-07/2020/02-FEB/110220/1433/42454DAR158\_FR3 ->  
 Injection Date : 12-Feb-20, 01:08:57  
 Sample Name : 42454DAR158\_FR31  
 Remarks : Baseline corrected  
 Acq. Method : D:/METHODS/5-95-6M.M  
 column used : Je\_559  
 Analysis Method : C:/CHEM32/1/METHODS/JPT-LCMS.M



Sample Info : 42454\_158-Dr. Martine Darwish H-SPFLITL-OH

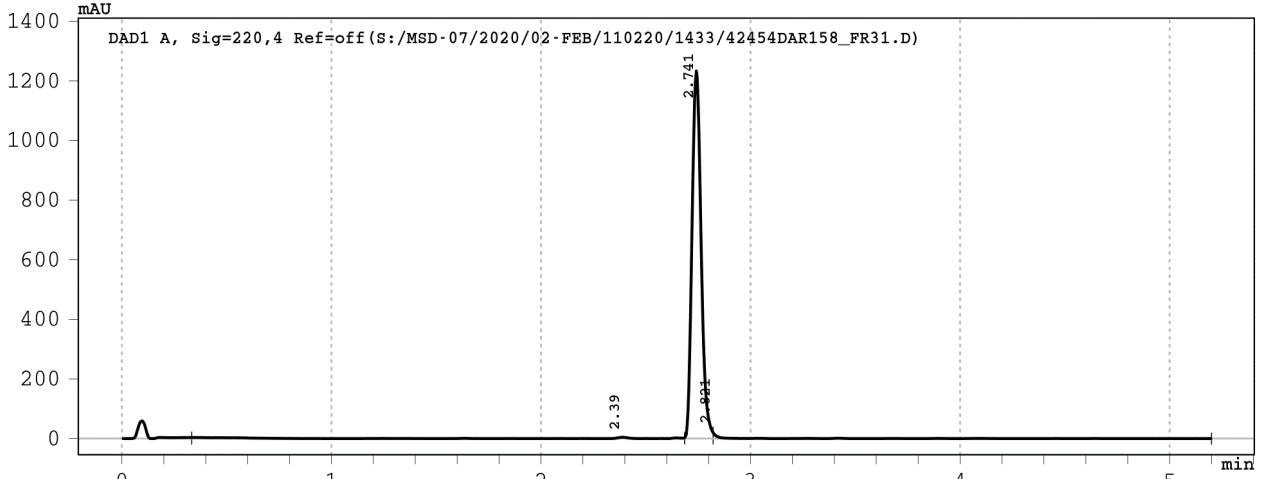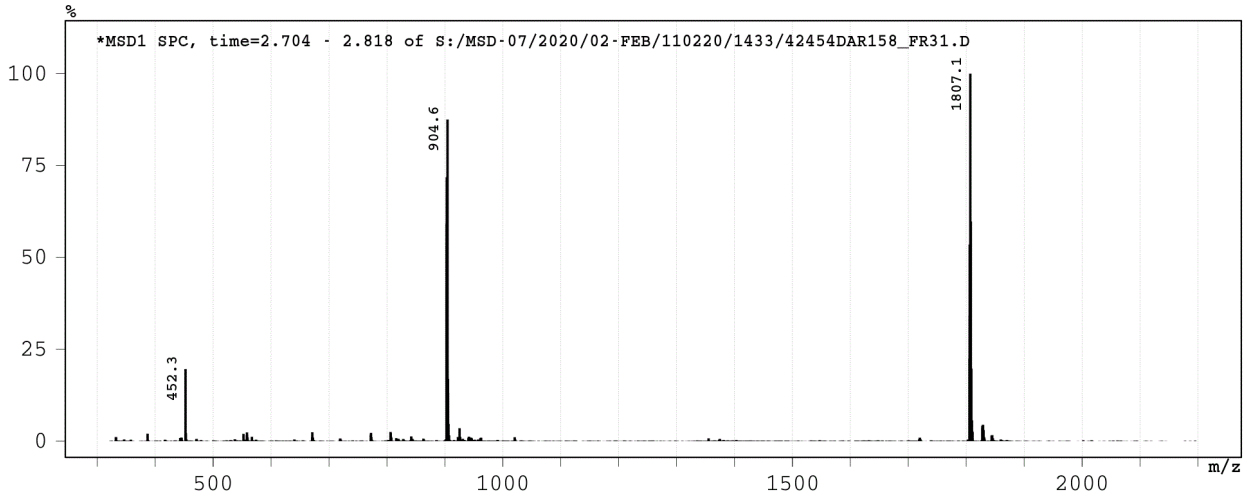

Signal 1: DAD1 A, Sig=220,4 Ref=off

| Peak # | RT [min] | Width [min] | Area   | Area % |
|--------|----------|-------------|--------|--------|
| 1      | 2.390    | 2.35        | 86.3   | 2.2    |
| 2      | 2.741    | 0.14        | 3722.1 | 96.7   |
| 3      | 2.821    | 2.38        | 40.7   | 1.1    |

Data File : S:/MSD-07/2020/02-FEB/070220/1430/42454DAR159\_FR7->



Injection Date : 07-Feb-20, 19:47:12  
Sample Name : 42454DAR159\_FR74  
Remarks : Baseline corrected  
Acq. Method : D:/METHODS/5-95-6M.M  
column used : Je\_559  
Analysis Method : C:/CHEM32/1/METHODS/JPT-LCMS.M

Sample Info : 42454\_159-Dr. Martine Darwish H-SAPPLLEGPL-OH

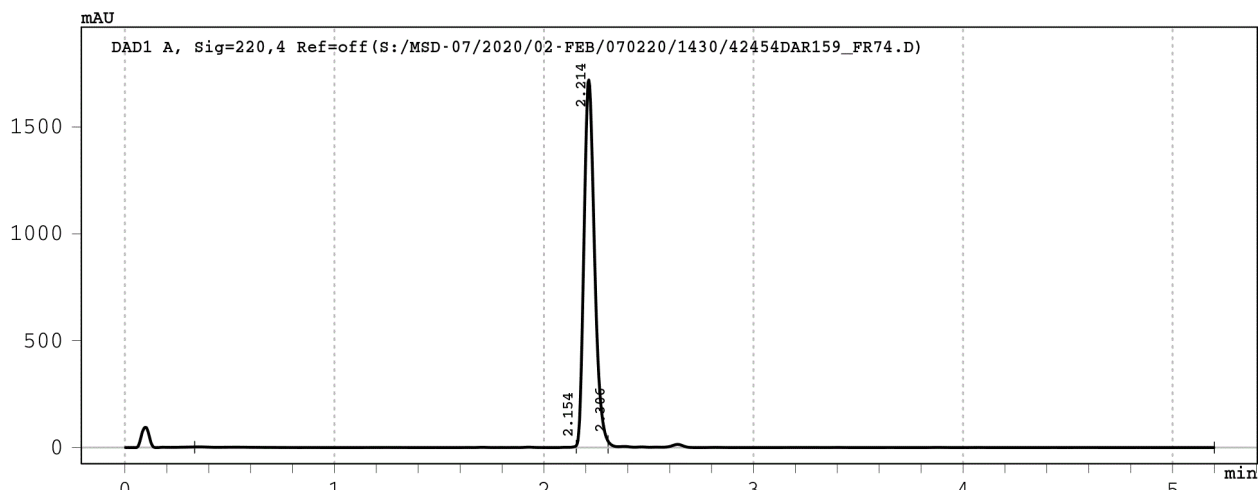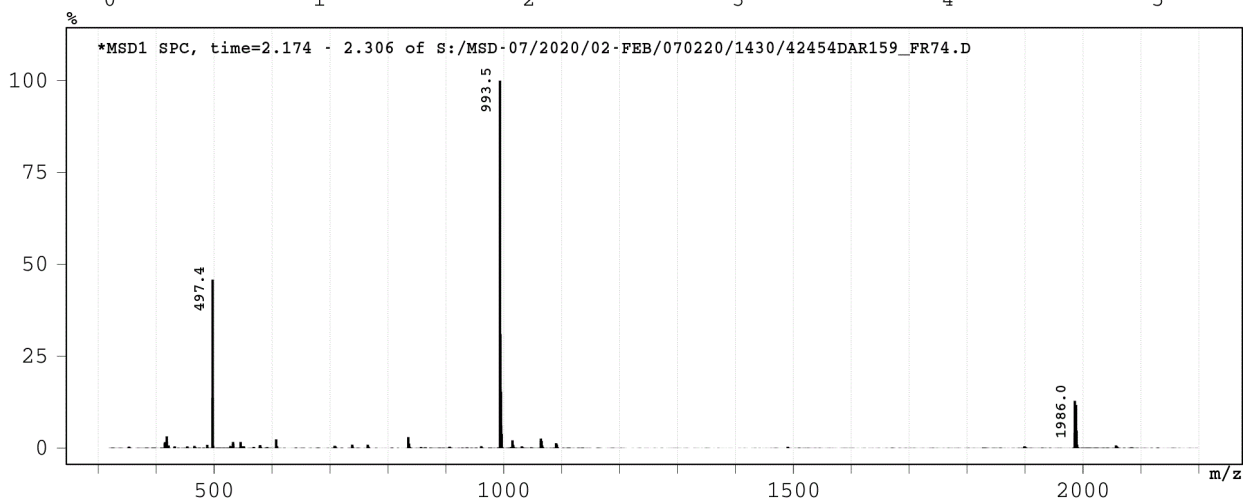

Signal 1: DAD1 A, Sig=220,4 Ref=off

| Peak # | RT [min] | Width [min] | Area   | Area % |
|--------|----------|-------------|--------|--------|
| 1      | 2.154    | 1.82        | 55.7   | 0.9    |
| 2      | 2.214    | 0.15        | 6019.0 | 97.0   |
| 3      | 2.306    | 2.89        | 130.6  | 2.1    |

Data File : S:/MSD-07/2020/02-FEB/070220/1430/42454DAR160\_FR7->



Injection Date : 07-Feb-20, 19:55:37  
Sample Name : 42454DAR160\_FR78-79  
Remarks : Baseline corrected  
Acq. Method : D:/METHODS/5-95-6M.M  
column used : Je\_559  
Analysis Method : C:/CHEM32/1/METHODS/JPT-LCMS.M

Sample Info : 42454\_160-Dr. Martine Darwish H-IQLVNGSLA-OH

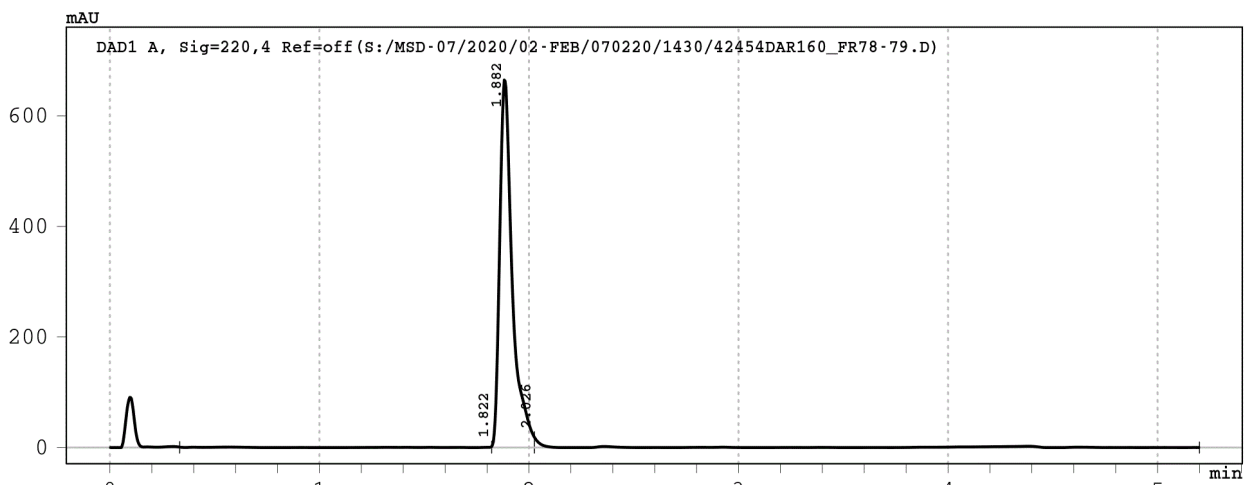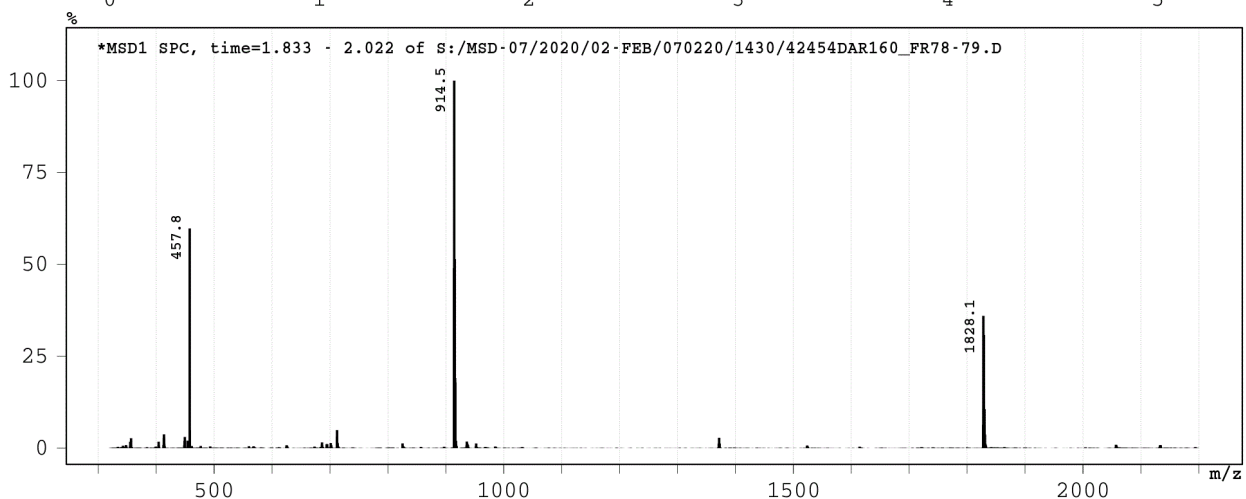

Signal 1: DAD1 A, Sig=220,4 Ref=off

| Peak # | RT [min] | Width [min] | Area   | Area % |
|--------|----------|-------------|--------|--------|
| 1      | 1.822    | 1.49        | 20.4   | 0.7    |
| 2      | 1.882    | 0.20        | 2786.4 | 95.8   |
| 3      | 2.026    | 3.17        | 100.6  | 3.5    |

Data File : S:/MSD-07/2020/02-FEB/060220/1429/42454DAR161\_FR7->  
 Injection Date : 06-Feb-20, 19:37:40  
 Sample Name : 42454DAR161\_FR78-80  
 Remarks : Baseline corrected  
 Acq. Method : D:/METHODS/5-95-6M.M  
 column used : Je\_559  
 Analysis Method : C:/CHEM32/1/METHODS/JPT-LCMS.M



Sample Info : 42454\_161-Dr. Martine Darwish H-IFVRHMGV-OH

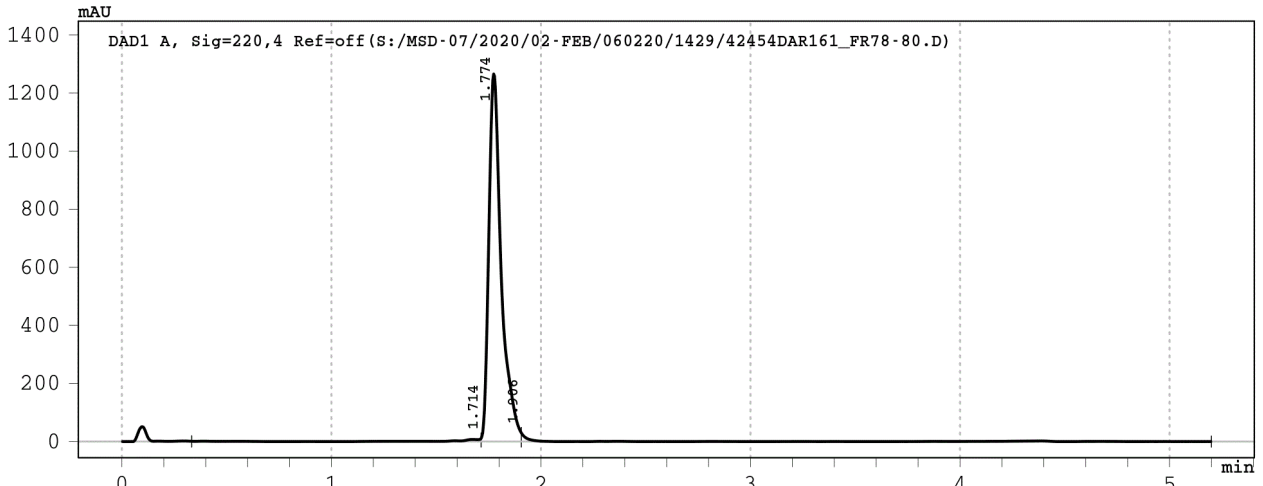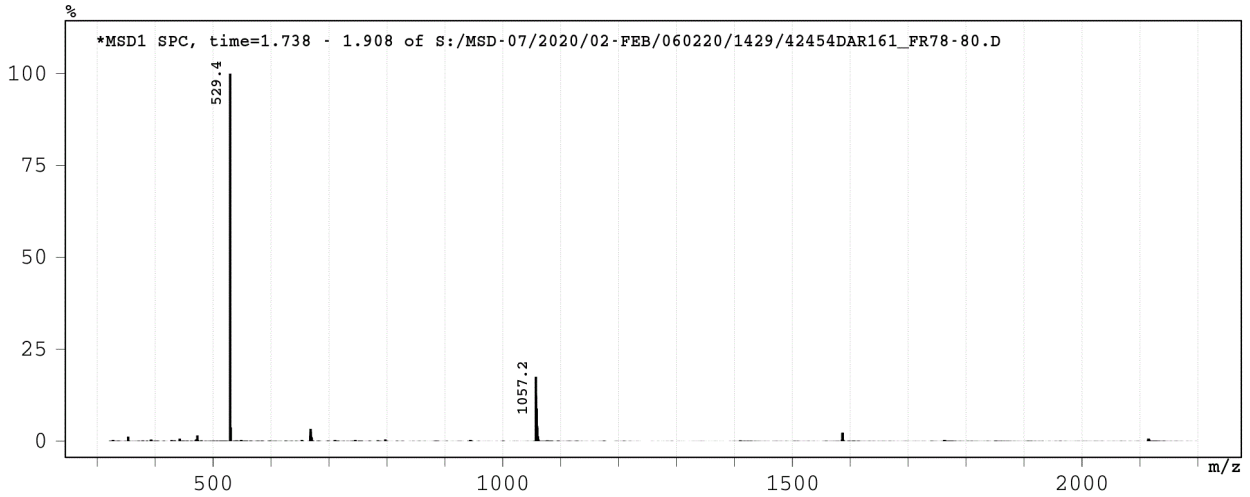

Signal 1: DAD1 A, Sig=220,4 Ref=off

| Peak # | RT [min] | Width [min] | Area   | Area % |
|--------|----------|-------------|--------|--------|
| 1      | 1.714    | 1.38        | 76.3   | 1.4    |
| 2      | 1.774    | 0.19        | 5245.0 | 96.7   |
| 3      | 1.906    | 3.29        | 100.9  | 1.9    |

Data File : S:/MSD-07/2020/02-FEB/110220/1433/42454DAR162\_FR4->  
 Injection Date : 12-Feb-20, 01:17:38  
 Sample Name : 42454DAR162\_FR41-42  
 Remarks : Baseline corrected  
 Acq. Method : D:/METHODS/5-95-6M.M  
 column used : Je\_559  
 Analysis Method : C:/CHEM32/1/METHODS/JPT-LCMS.M



Sample Info : 42454\_162-Dr. Martine Darwish H-ICYGSAPL-OH

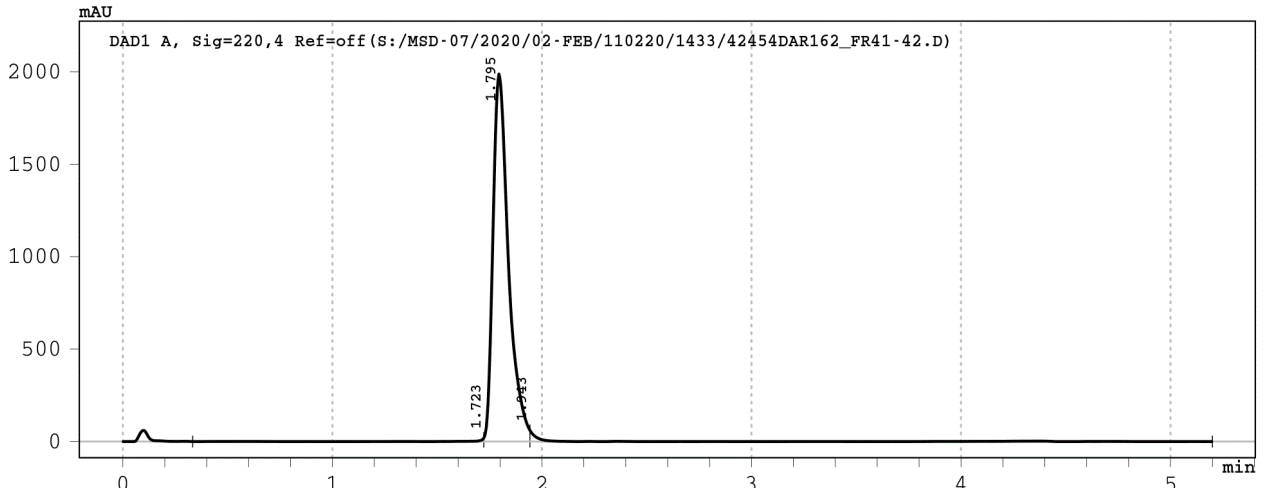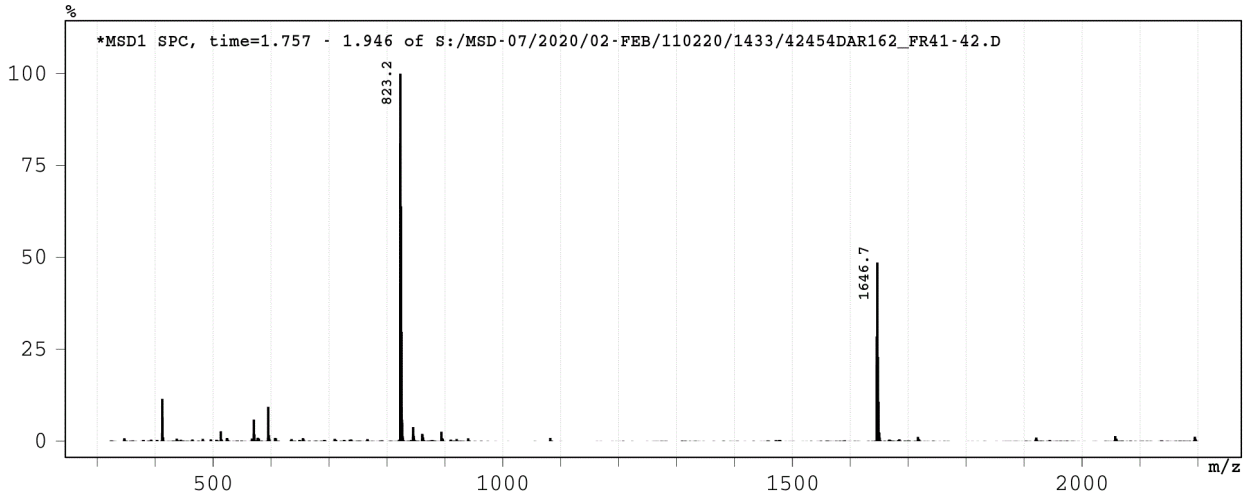

Signal 1: DAD1 A, Sig=220,4 Ref=off

| Peak # | RT [min] | Width [min] | Area    | Area % |
|--------|----------|-------------|---------|--------|
| 1      | 1.723    | 1.39        | 37.5    | 0.4    |
| 2      | 1.795    | 0.22        | 10228.6 | 97.8   |
| 3      | 1.943    | 3.26        | 187.6   | 1.8    |

Data File : S:/MSD-07/2020/02-FEB/110220/1433/42454DAR163\_FR5->  
 Injection Date : 12-Feb-20, 01:26:47  
 Sample Name : 42454DAR163\_FR59-61  
 Remarks : Baseline corrected  
 Acq. Method : D:/METHODS/5-95-6M.M  
 column used : Je\_559  
 Analysis Method : C:/CHEM32/1/METHODS/JPT-LCMS.M



Sample Info : 42454\_163-Dr. Martine Darwish H-YIPLFPHL-OH

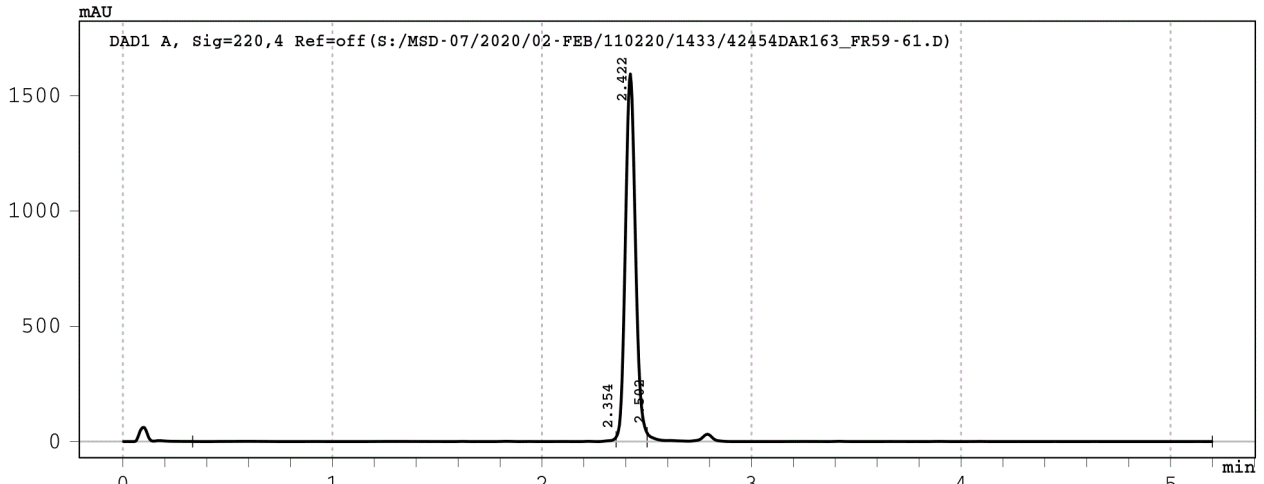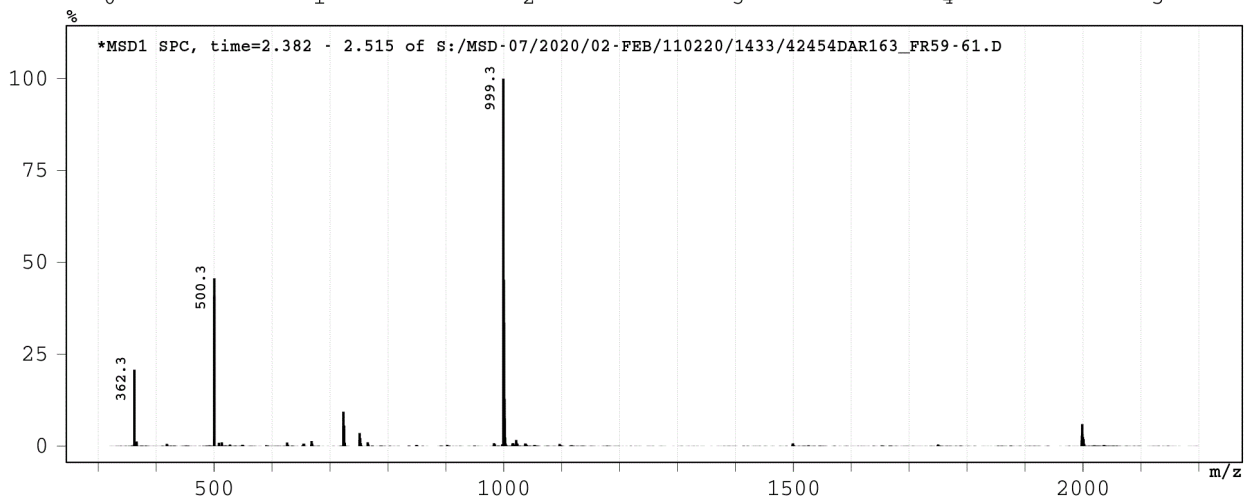

Signal 1: DAD1 A, Sig=220,4 Ref=off

| Peak # | RT [min] | Width [min] | Area   | Area % |
|--------|----------|-------------|--------|--------|
| 1      | 2.354    | 2.02        | 46.2   | 0.8    |
| 2      | 2.422    | 0.15        | 5337.2 | 95.3   |
| 3      | 2.502    | 2.70        | 214.9  | 3.8    |



Data File : S:/MSD-07/2020/02-FEB/070220/1430/42454DAR164\_FR8->



Injection Date : 07-Feb-20, 20:03:59  
Sample Name : 42454DAR164\_FR82  
Remarks : Baseline corrected  
Acq. Method : D:/METHODS/5-95-6M.M  
column used : Je\_559  
Analysis Method : C:/CHEM32/1/METHODS/JPT-LCMS.M

Sample Info : 42454\_164-Dr. Martine Darwish H-TAVVRQSTL-OH

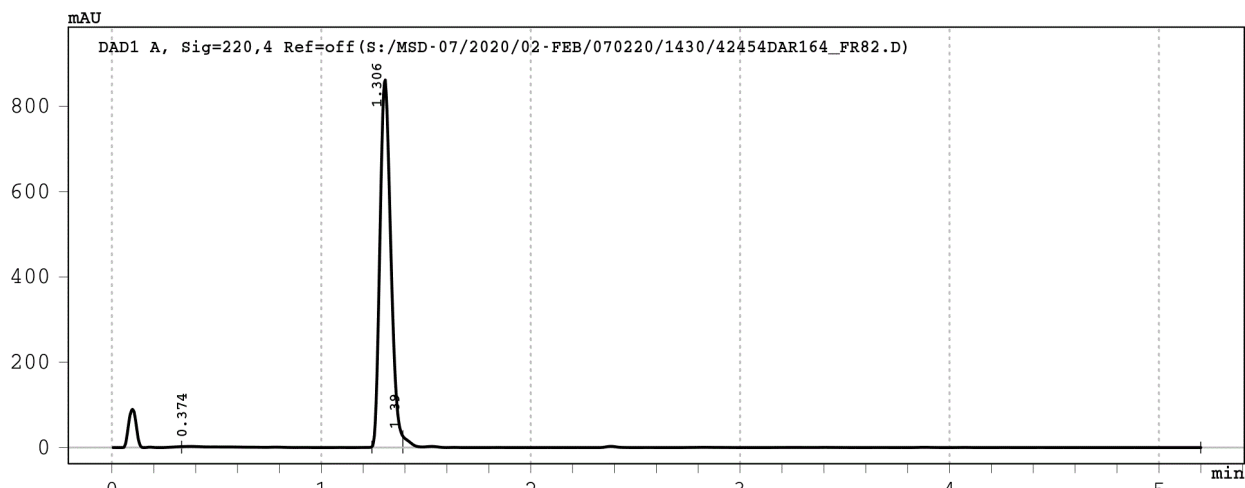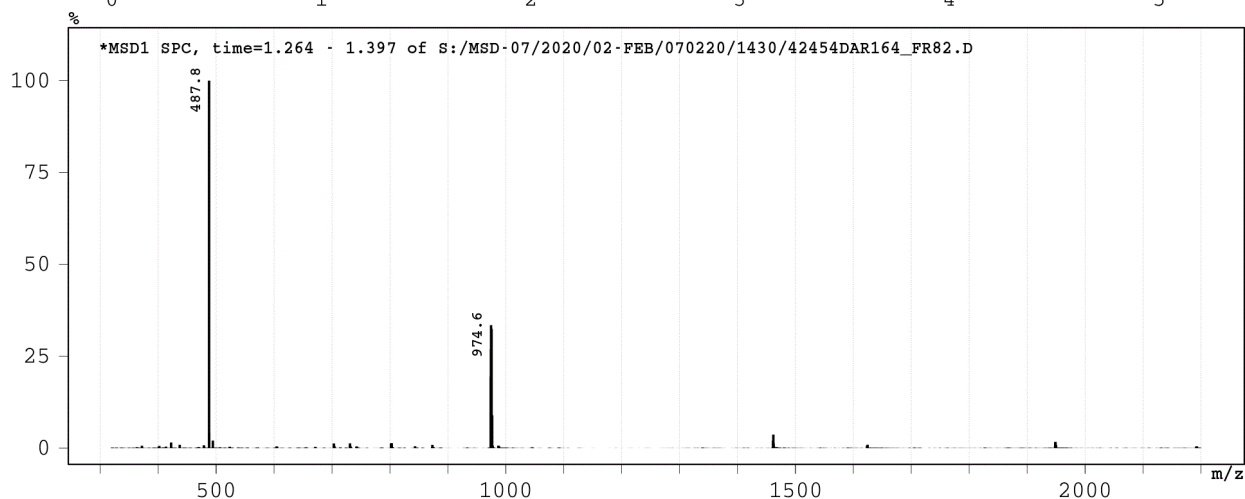

Signal 1: DAD1 A, Sig=220,4 Ref=off

| Peak # | RT [min] | Width [min] | Area   | Area % |
|--------|----------|-------------|--------|--------|
| 1      | 0.374    | 0.91        | 41.1   | 1.3    |
| 2      | 1.306    | 0.15        | 3103.1 | 96.0   |
| 3      | 1.390    | 3.81        | 87.3   | 2.7    |

Data File : S:/MSD-07/2020/02-FEB/070220/1430/42454DAR165\_FR9->



Injection Date : 07-Feb-20, 20:12:21  
Sample Name : 42454DAR165\_FR9-10  
Remarks : Baseline corrected  
Acq. Method : D:/METHODS/5-95-6M.M  
column used : Je\_559  
Analysis Method : C:/CHEM32/1/METHODS/JPT-LCMS.M

Sample Info : 42454\_165-Dr. Martine Darwish H-SYVSLWPD-L-OH

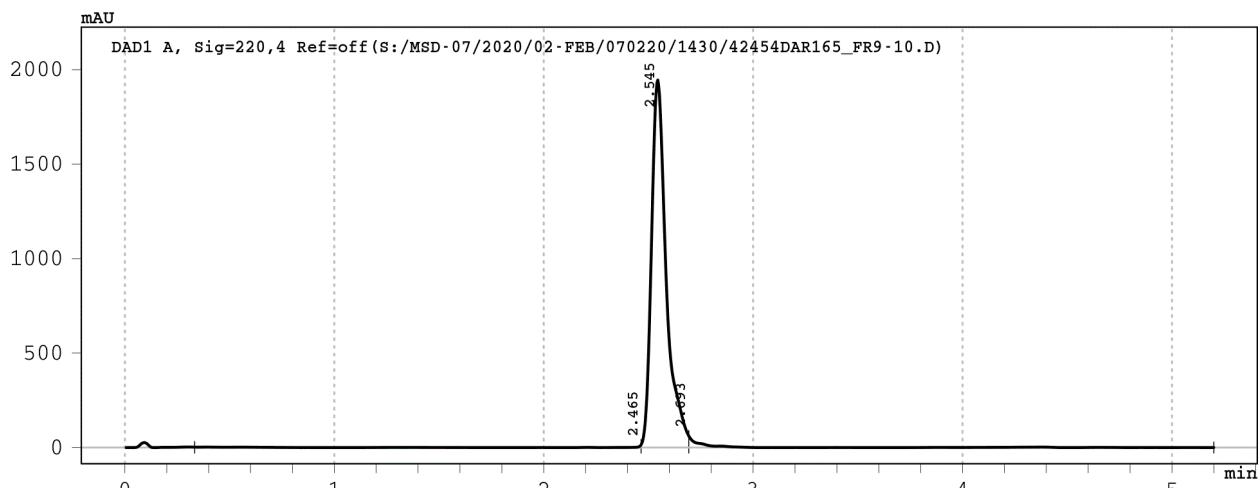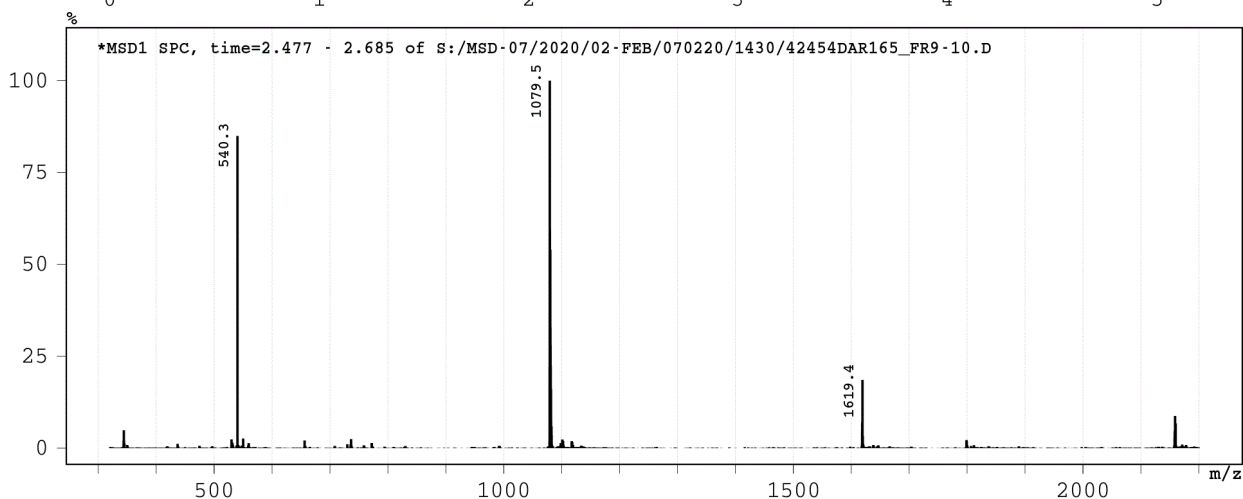

Signal 1: DAD1 A, Sig=220,4 Ref=off

| Peak # | RT [min] | Width [min] | Area   | Area % |
|--------|----------|-------------|--------|--------|
| 1      | 2.465    | 2.13        | 72.3   | 0.7    |
| 2      | 2.545    | 0.23        | 9574.7 | 96.7   |
| 3      | 2.693    | 2.51        | 258.8  | 2.6    |

Data File : S:/MSD-07/2020/02-FEB/110220/1433/42454DAR166\_FR7->



Injection Date : 12-Feb-20, 01:35:20  
Sample Name : 42454DAR166\_FR72-74  
Remarks : Baseline corrected  
Acq. Method : D:/METHODS/5-95-6M.M  
column used : Je\_559  
Analysis Method : C:/CHEM32/1/METHODS/JPT-LCMS.M

Sample Info : 42454\_166-Dr. Martine Darwish H-STPQLLPL-OH

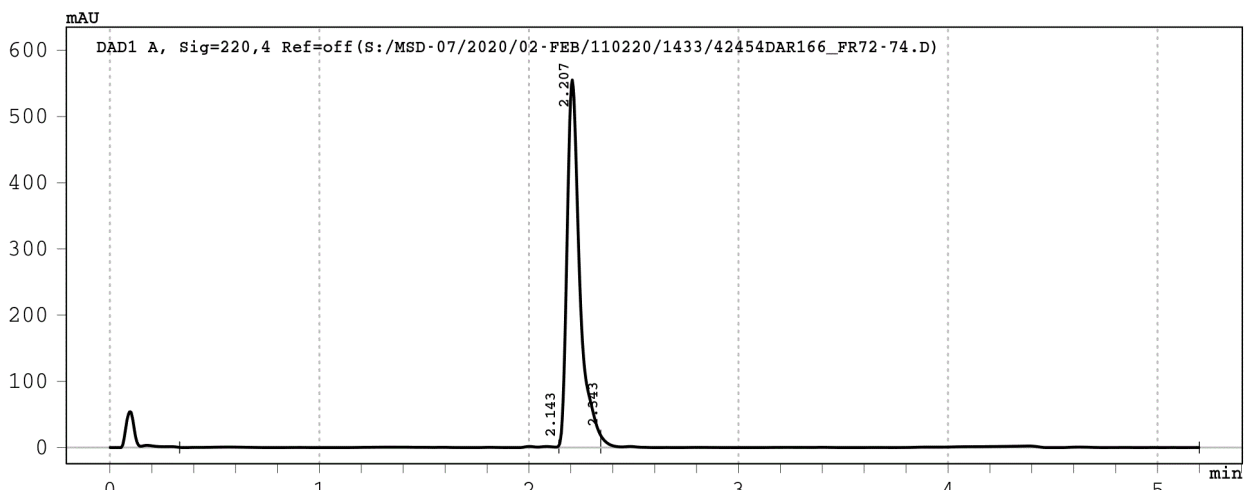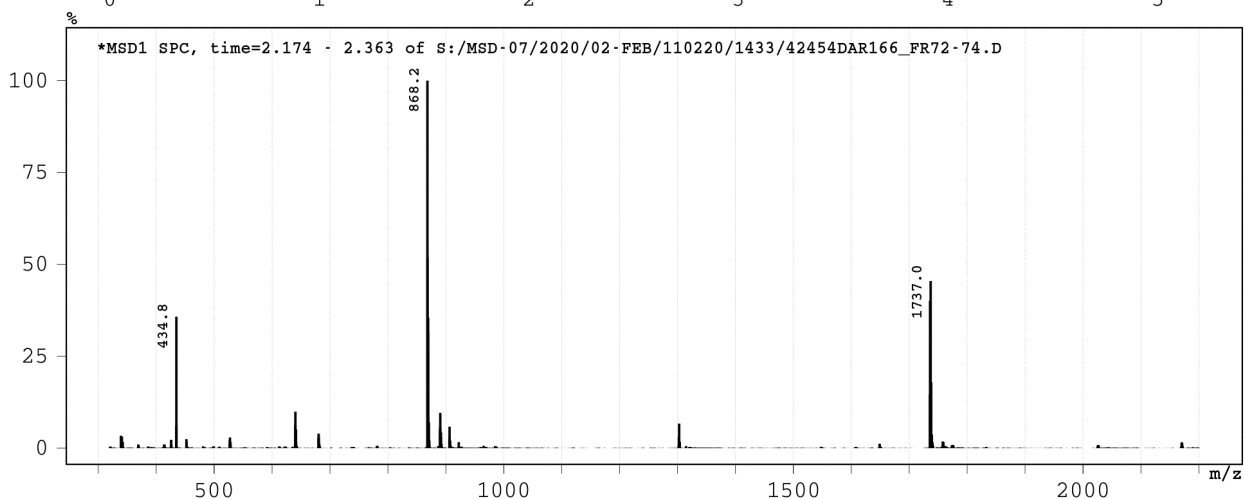

Signal 1: DAD1 A, Sig=220,4 Ref=off

| Peak # | RT [min] | Width [min] | Area   | Area % |
|--------|----------|-------------|--------|--------|
| 1      | 2.143    | 1.81        | 33.7   | 1.4    |
| 2      | 2.207    | 0.20        | 2352.2 | 94.7   |
| 3      | 2.343    | 2.86        | 98.0   | 3.9    |

Data File : S:/MSD-07/2020/02-FEB/070220/1430/42454DAR167\_FR2->  
 Injection Date : 07-Feb-20, 20:20:44  
 Sample Name : 42454DAR167\_FR22-23  
 Remarks : Baseline corrected  
 Acq. Method : D:/METHODS/5-95-6M.M  
 column used : Je\_559  
 Analysis Method : C:/CHEM32/1/METHODS/JPT-LCMS.M



Sample Info : 42454\_167-Dr. Martine Darwish H-FVLESYLNL-OH

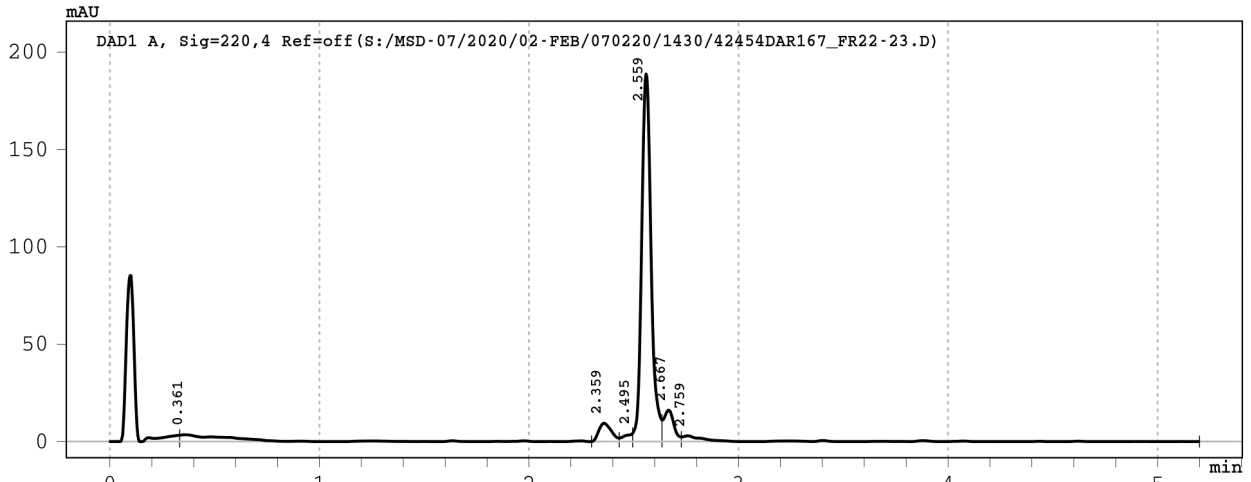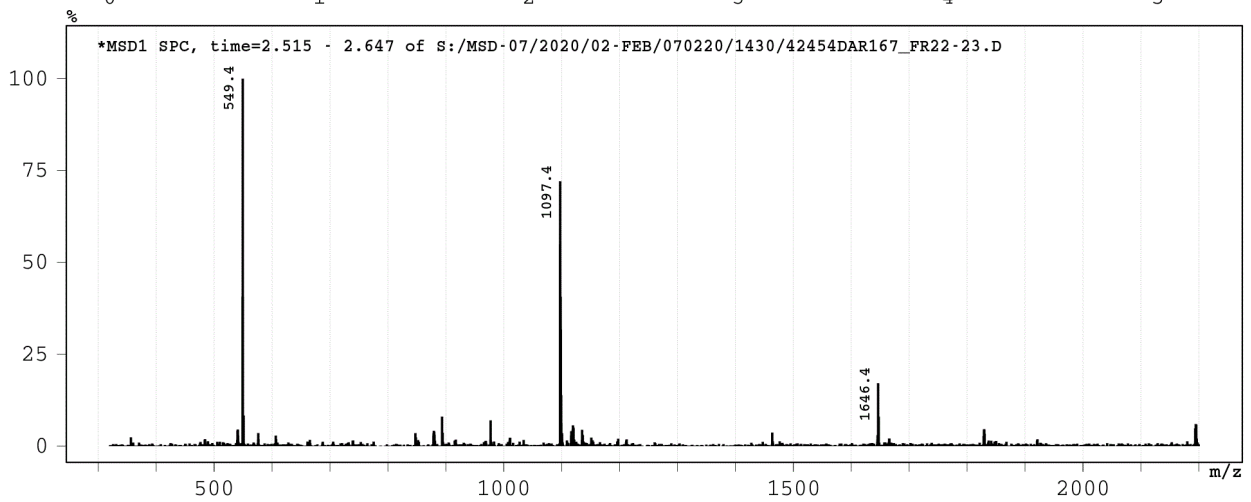

Signal 1: DAD1 A, Sig=220,4 Ref=off

| Peak # | RT [min] | Width [min] | Area  | Area % |
|--------|----------|-------------|-------|--------|
| 1      | 0.361    | 1.97        | 59.6  | 7.6    |
| 2      | 2.359    | 0.13        | 39.4  | 5.0    |
| 3      | 2.495    | 0.06        | 11.2  | 1.4    |
| 4      | 2.559    | 0.14        | 593.8 | 75.5   |
| 5      | 2.667    | 0.09        | 54.8  | 7.0    |
| 6      | 2.759    | 2.47        | 27.5  | 3.5    |

Data File : S:/MSD-07/2020/02-FEB/060220/1429/42454DAR168\_FR8->



Injection Date : 06-Feb-20, 19:46:02  
Sample Name : 42454DAR168\_FR84+1  
Remarks : Baseline corrected  
Acq. Method : D:/METHODS/5-95-6M.M  
column used : Je\_559  
Analysis Method : C:/CHEM32/1/METHODS/JPT-LCMS.M

Sample Info : 42454\_168-Dr. Martine Darwish H-MSRCNHRL-OH

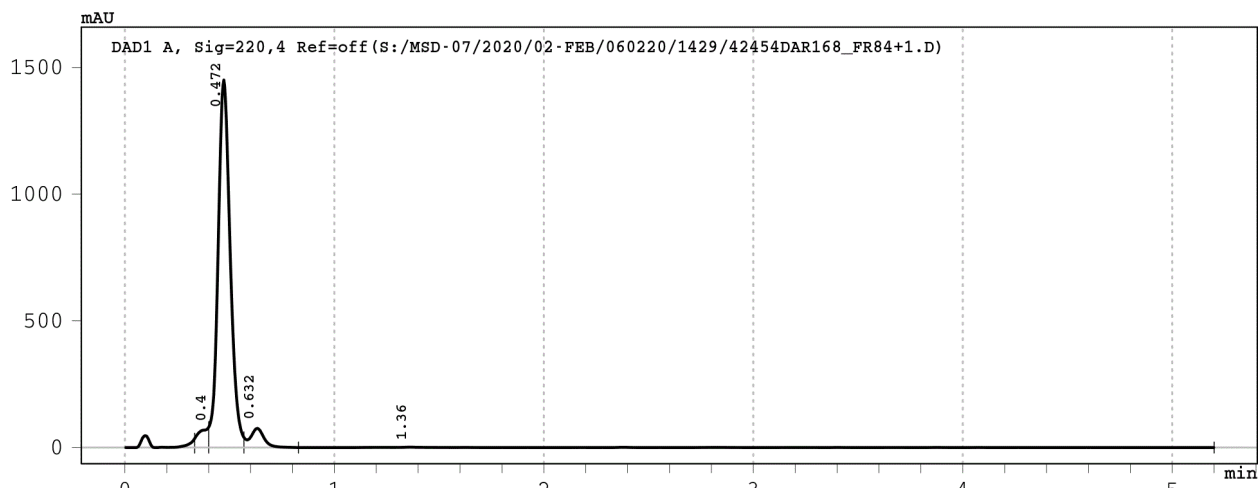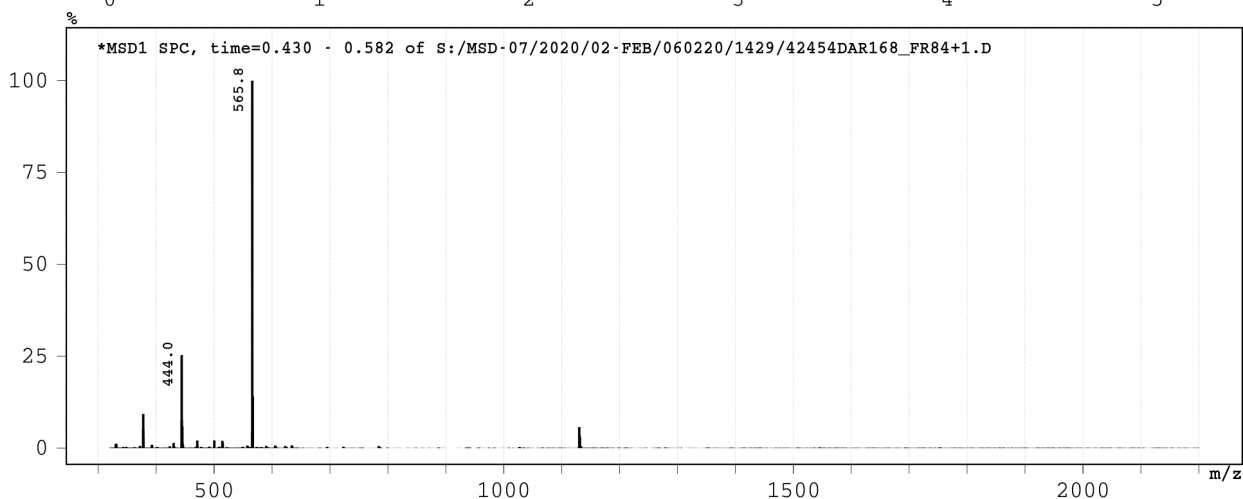

Signal 1: DAD1 A, Sig=220,4 Ref=off

| Peak # | RT [min] | Width [min] | Area   | Area % |
|--------|----------|-------------|--------|--------|
| 1      | 0.400    | 0.07        | 244.5  | 3.8    |
| 2      | 0.472    | 0.17        | 5847.2 | 90.2   |
| 3      | 0.632    | 0.26        | 358.2  | 5.5    |
| 4      | 1.360    | 4.37        | 32.9   | 0.5    |

Data File : S:/MSD-07/2020/02-FEB/070220/1430/42454DAR169\_FR3 ->



Injection Date : 07-Feb-20, 20:29:05  
Sample Name : 42454DAR169\_FR31  
Remarks : Baseline corrected  
Acq. Method : D:/METHODS/5-95-6M.M  
column used : Je\_559  
Analysis Method : C:/CHEM32/1/METHODS/JPT-LCMS.M

Sample Info : 42454\_169-Dr. Martine Darwish H-SAWEVLIPL-OH

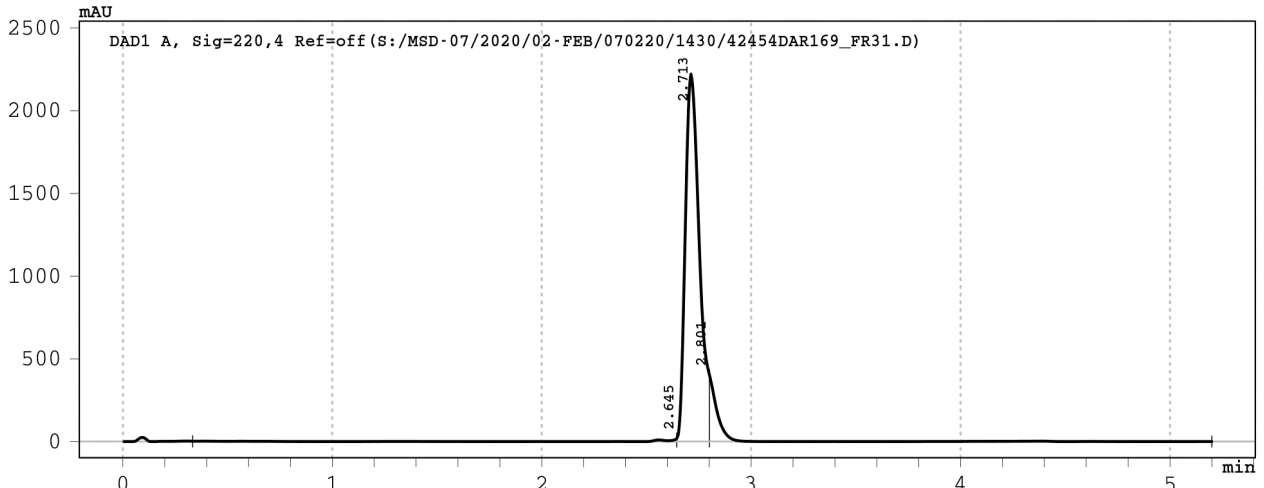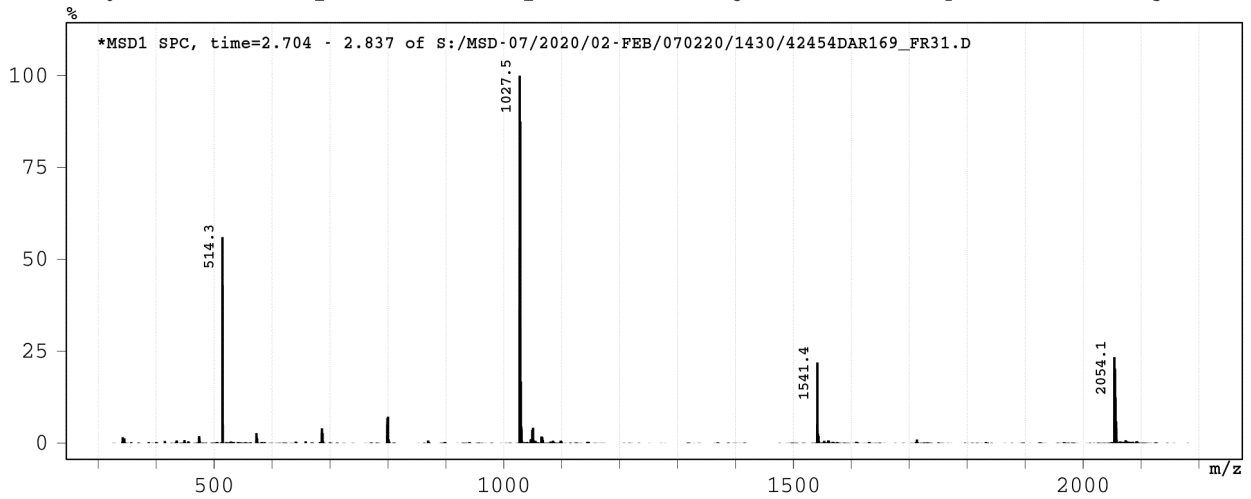

Signal 1: DAD1 A, Sig=220,4 Ref=off

| Peak # | RT [min] | Width [min] | Area    | Area % |
|--------|----------|-------------|---------|--------|
| 1      | 2.645    | 2.31        | 112.2   | 1.0    |
| 2      | 2.713    | 0.16        | 10343.1 | 90.0   |
| 3      | 2.801    | 2.40        | 1034.6  | 9.0    |

Data File : S:/MSD-07/2020/02-FEB/070220/1430/42454DAR170\_FR4->  
Injection Date : 07-Feb-20, 20:37:27  
Sample Name : 42454DAR170\_FR41-42  
Remarks : Baseline corrected  
Acq. Method : D:/METHODS/5-95-6M.M  
column used : Je\_559  
Analysis Method : C:/CHEM32/1/METHODS/JPT-LCMS.M



Sample Info : 42454\_170-Dr. Martine Darwish H-ATLAQFNTV-OH

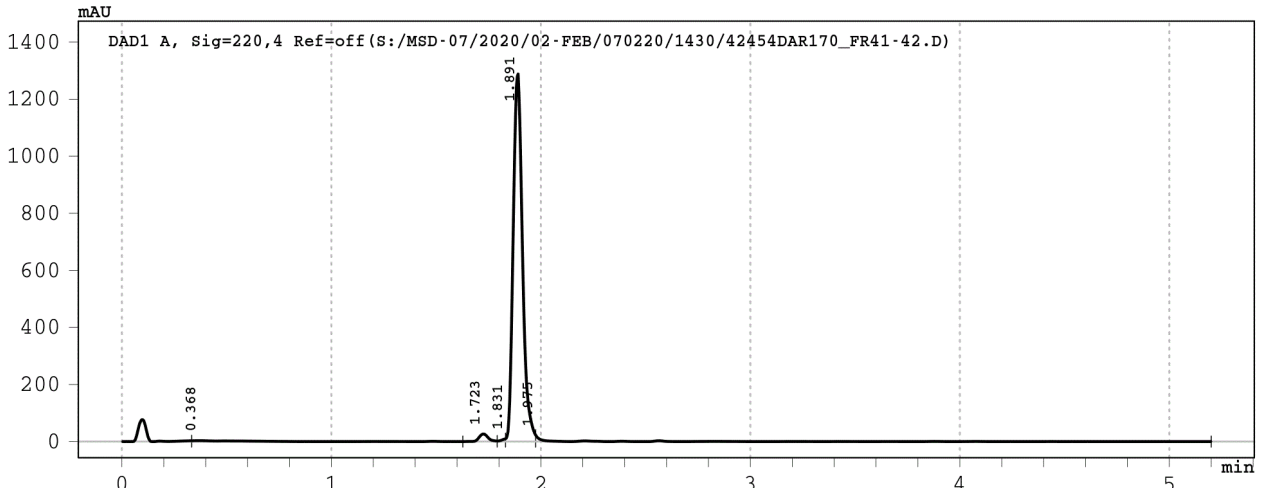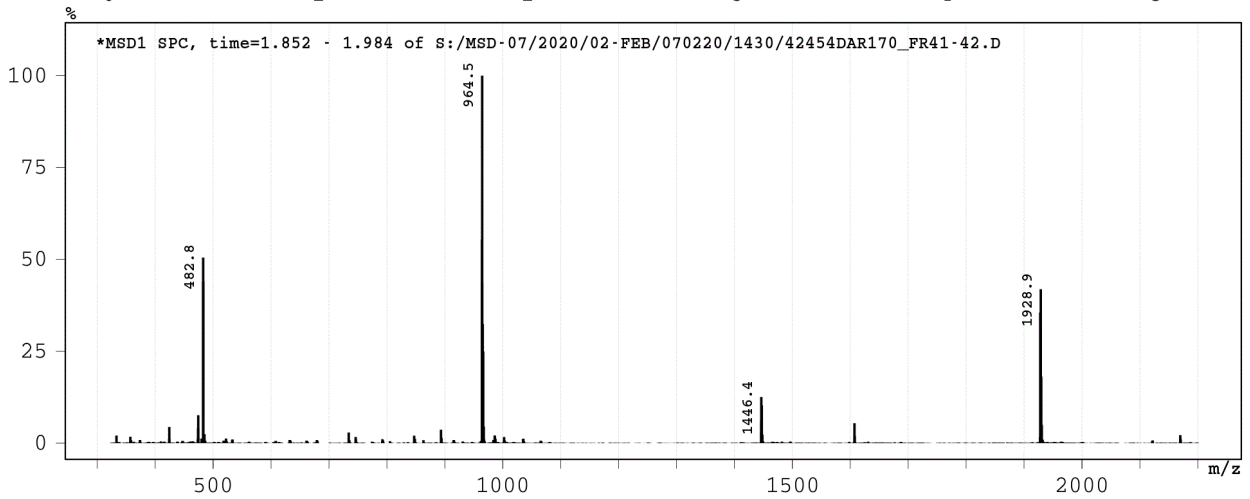

Signal 1: DAD1 A, Sig=220,4 Ref=off

| Peak # | RT [min] | Width [min] | Area   | Area % |
|--------|----------|-------------|--------|--------|
| 1      | 0.368    | 1.29        | 51.7   | 1.2    |
| 2      | 1.723    | 0.16        | 79.4   | 1.9    |
| 3      | 1.831    | 0.04        | 12.1   | 0.3    |
| 4      | 1.891    | 0.14        | 3979.0 | 95.0   |
| 5      | 1.975    | 3.22        | 65.4   | 1.6    |

Data File : S:/MSD-07/2020/02-FEB/060220/1429/42454DAR171\_FR8->  
 Injection Date : 06-Feb-20, 19:54:27  
 Sample Name : 42454DAR171\_FR8-9  
 Remarks : Baseline corrected  
 Acq. Method : D:/METHODS/5-95-6M.M  
 column used : Je\_559  
 Analysis Method : C:/CHEM32/1/METHODS/JPT-LCMS.M



Sample Info : 42454\_171-Dr. Martine Darwish H-FAMLGTIPL-OH

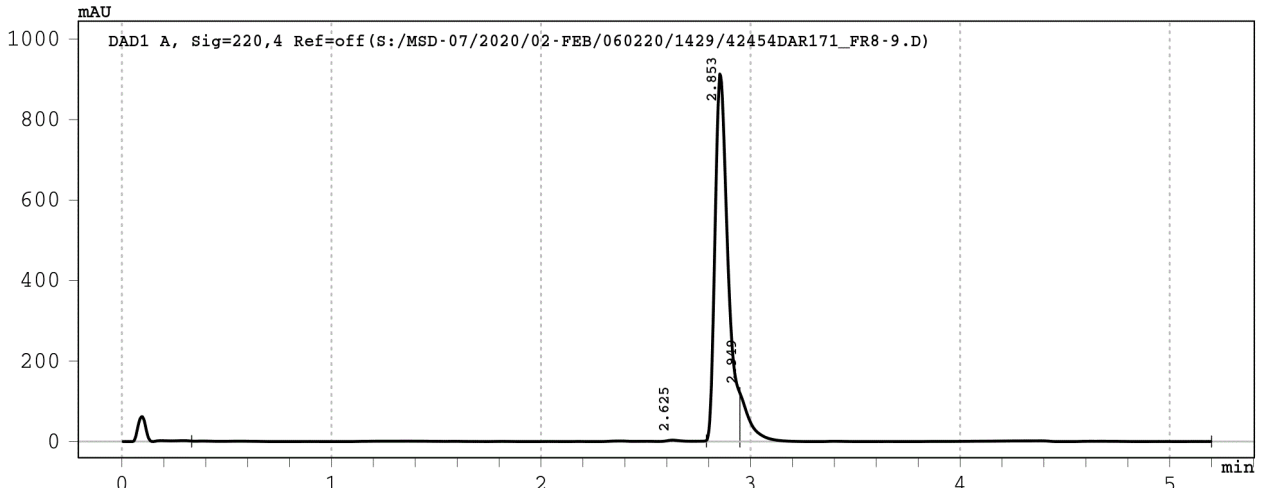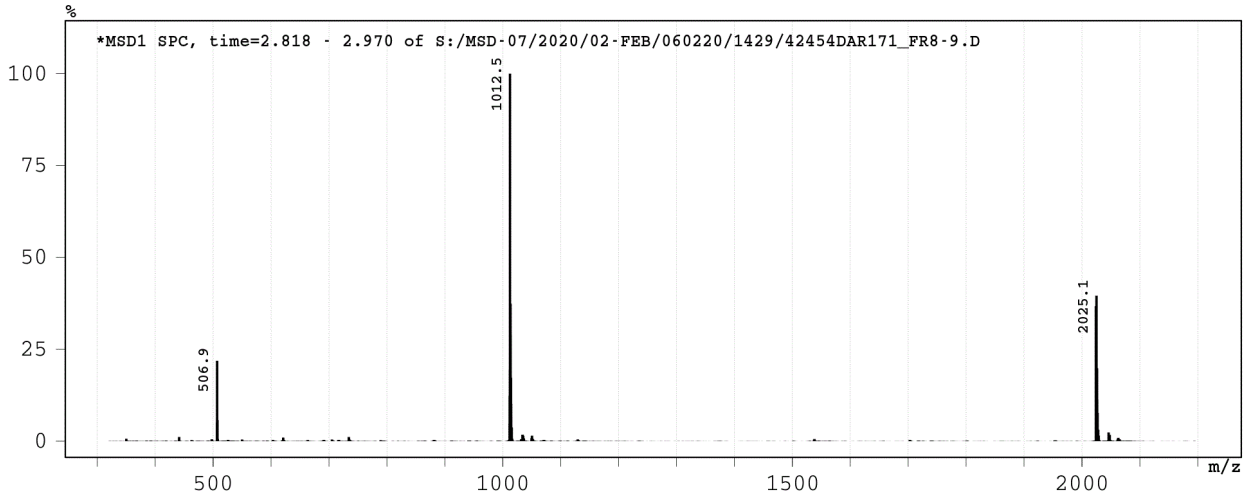

Signal 1: DAD1 A, Sig=220,4 Ref=off

| Peak # | RT [min] | Width [min] | Area   | Area % |
|--------|----------|-------------|--------|--------|
| 1      | 2.625    | 2.46        | 74.0   | 1.7    |
| 2      | 2.853    | 0.16        | 3886.1 | 88.4   |
| 3      | 2.949    | 2.25        | 433.5  | 9.9    |



Data File : S:/MSD-07/2020/02-FEB/060220/1429/42454DAR172\_FR1->



Injection Date : 06-Feb-20, 20:02:50  
Sample Name : 42454DAR172\_FR16-17  
Remarks : Baseline corrected  
Acq. Method : D:/METHODS/5-95-6M.M  
column used : Je\_559  
Analysis Method : C:/CHEM32/1/METHODS/JPT-LCMS.M

Sample Info : 42454\_172-Dr. Martine Darwish H-VAQNRHCEL-OH

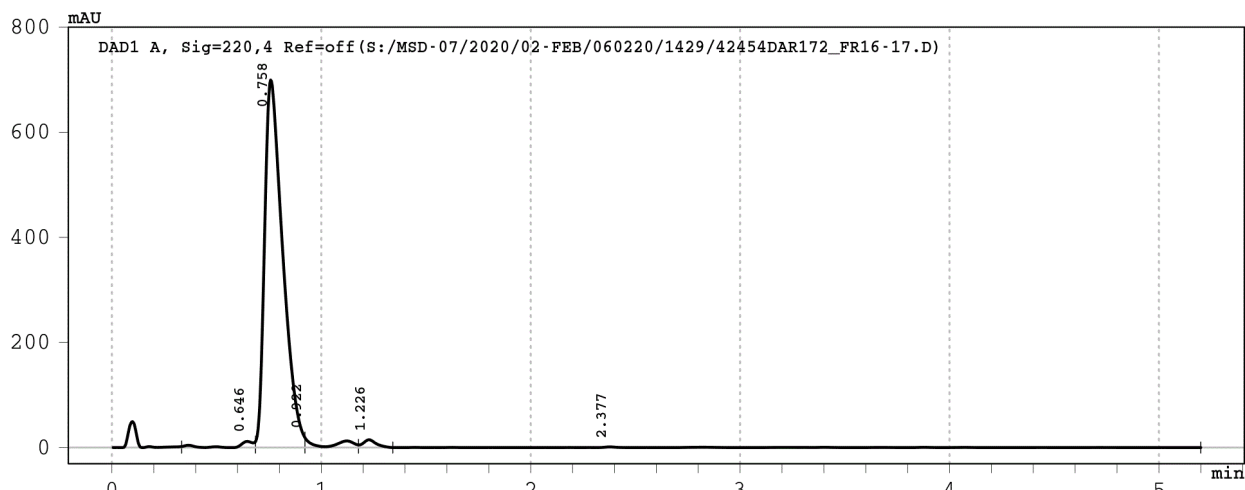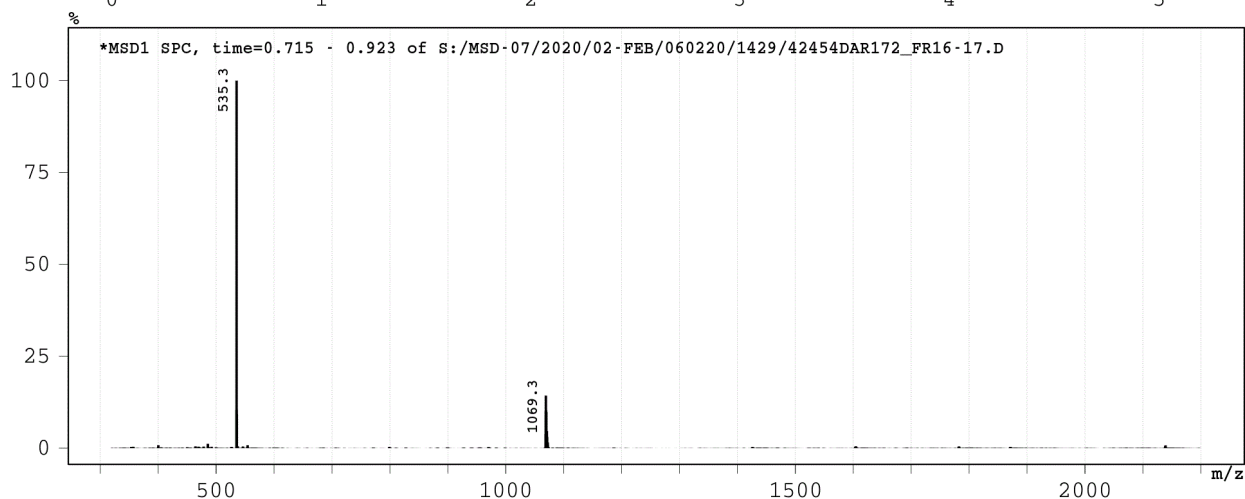

Signal 1: DAD1 A, Sig=220,4 Ref=off

| Peak # | RT [min] | Width [min] | Area   | Area % |
|--------|----------|-------------|--------|--------|
| 1      | 0.646    | 0.35        | 63.2   | 1.4    |
| 2      | 0.758    | 0.24        | 4215.8 | 94.4   |
| 3      | 0.922    | 0.26        | 105.1  | 2.4    |
| 4      | 1.226    | 0.16        | 64.6   | 1.4    |
| 5      | 2.377    | 3.86        | 19.1   | 0.4    |

Data File : S:/MSD-07/2020/02-FEB/070220/1430/42454DAR173\_FR5->  
 Injection Date : 07-Feb-20, 20:45:50  
 Sample Name : 42454DAR173\_FR50  
 Remarks : Baseline corrected  
 Acq. Method : D:/METHODS/5-95-6M.M  
 column used : Je\_559  
 Analysis Method : C:/CHEM32/1/METHODS/JPT-LCMS.M



Sample Info : 42454\_173-Dr. Martine Darwish H-YVWGRYDFL-OH

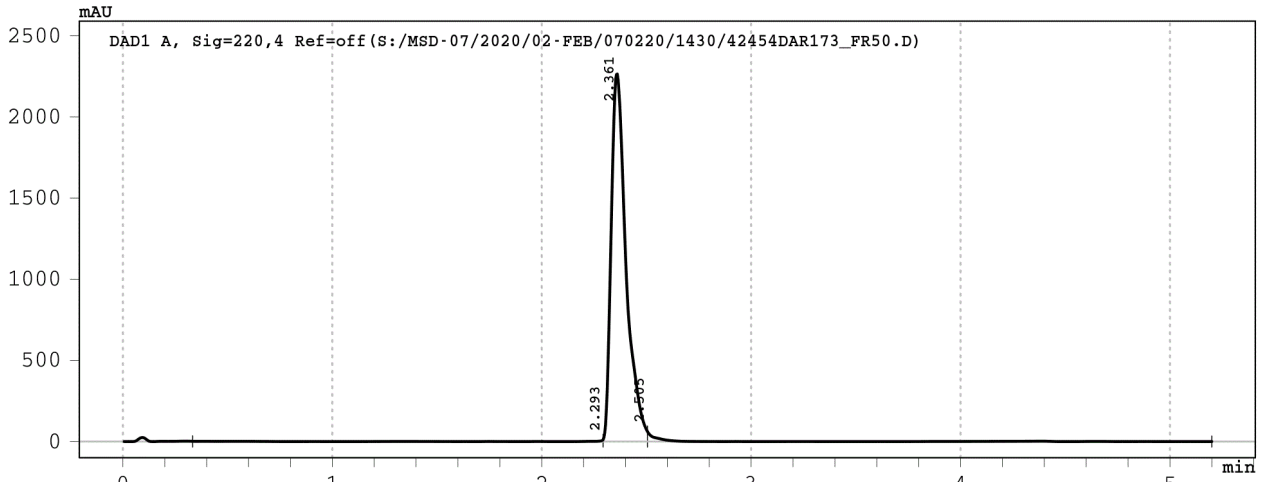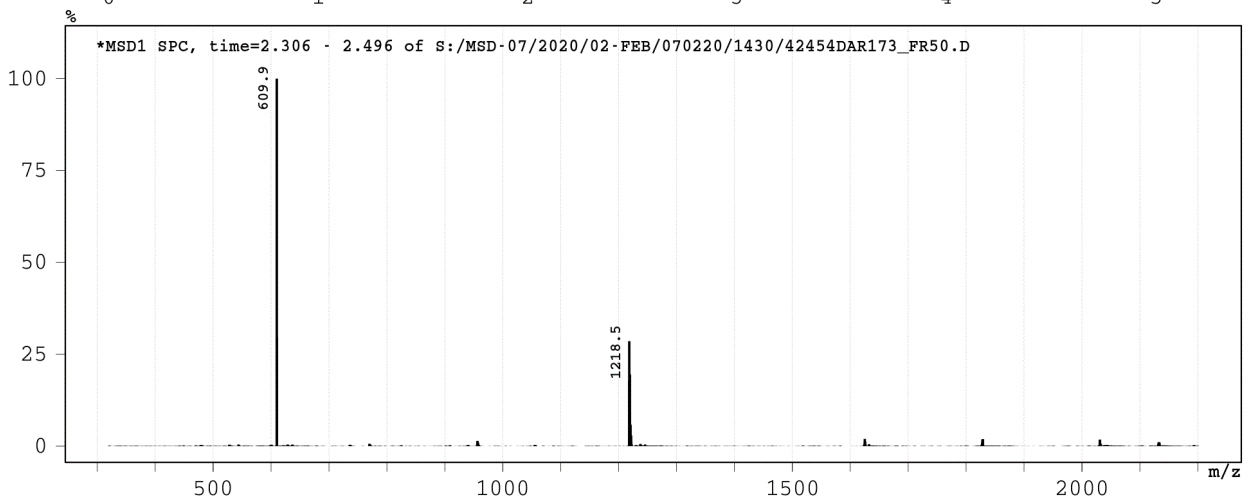

Signal 1: DAD1 A, Sig=220,4 Ref=off

| Peak # | RT [min] | Width [min] | Area    | Area % |
|--------|----------|-------------|---------|--------|
| 1      | 2.293    | 1.96        | 52.7    | 0.5    |
| 2      | 2.361    | 0.21        | 11232.2 | 97.7   |
| 3      | 2.505    | 2.70        | 211.2   | 1.8    |

Data File : S:/MSD-07/2020/02-FEB/060220/1429/42454DAR174\_FR2->  
 Injection Date : 06-Feb-20, 20:19:38  
 Sample Name : 42454DAR174\_FR22-23  
 Remarks : Baseline corrected  
 Acq. Method : D:/METHODS/5-95-6M.M  
 column used : Je\_559  
 Analysis Method : C:/CHEM32/1/METHODS/JPT-LCMS.M



Sample Info : 42454\_174-Dr. Martine Darwish H-MNMGQFLEF-OH

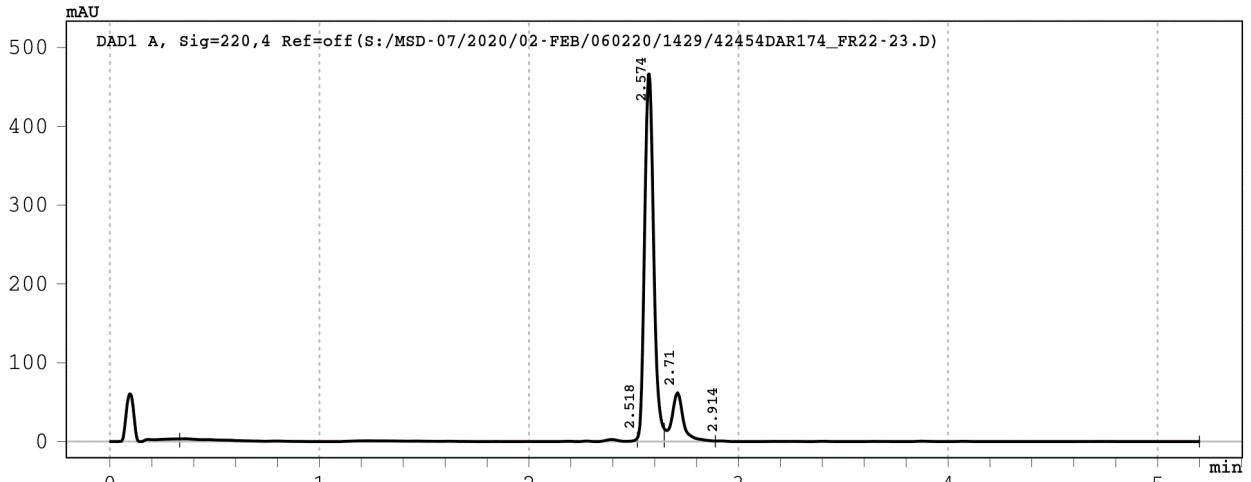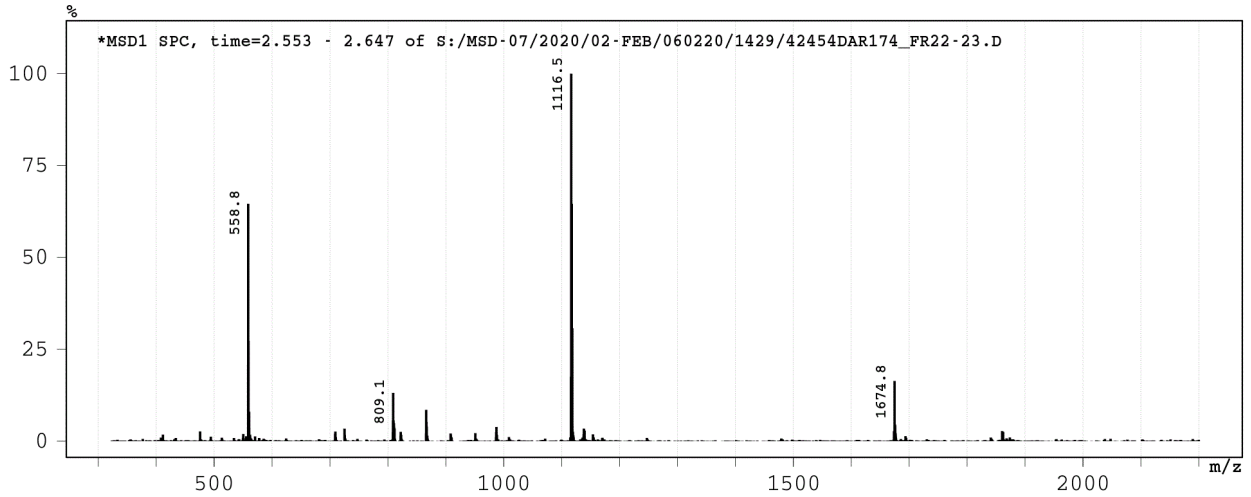

Signal 1: DAD1 A, Sig=220,4 Ref=off

| Peak # | RT [min] | Width [min] | Area   | Area % |
|--------|----------|-------------|--------|--------|
| 1      | 2.518    | 2.18        | 83.7   | 4.8    |
| 2      | 2.574    | 0.13        | 1408.3 | 80.7   |
| 3      | 2.710    | 0.24        | 244.8  | 14.0   |
| 4      | 2.914    | 2.31        | 8.6    | 0.5    |

Data File : S:/MSD-07/2020/02-FEB/070220/1430/42454DAR175\_FR5->  
 Injection Date : 07-Feb-20, 20:54:13  
 Sample Name : 42454DAR175\_FR58-59  
 Remarks : Baseline corrected  
 Acq. Method : D:/METHODS/5-95-6M.M  
 column used : Je\_559  
 Analysis Method : C:/CHEM32/1/METHODS/JPT-LCMS.M



Sample Info : 42454\_175-Dr. Martine Darwish H-SVTVFVNNL-OH

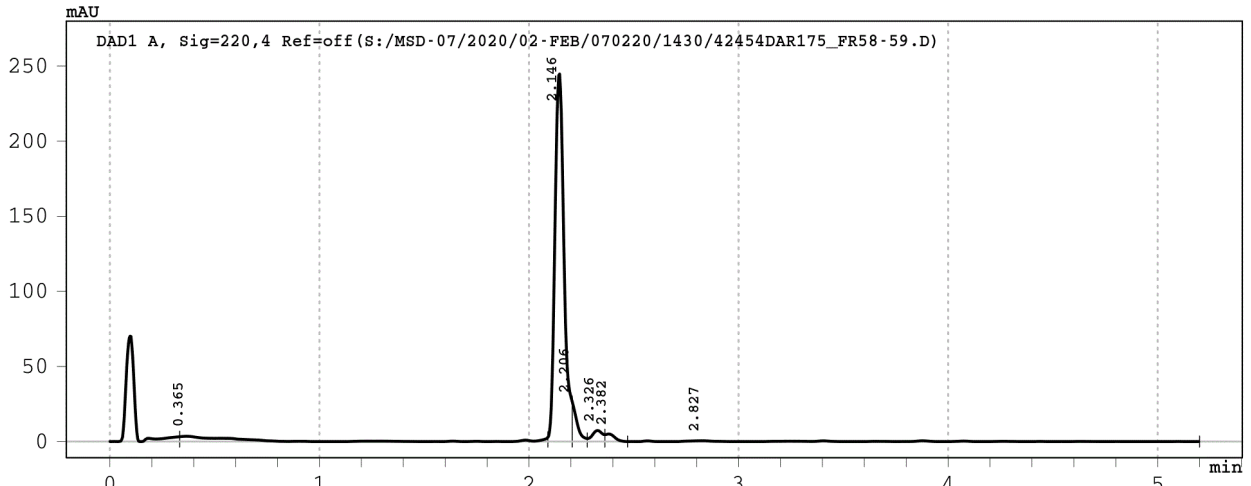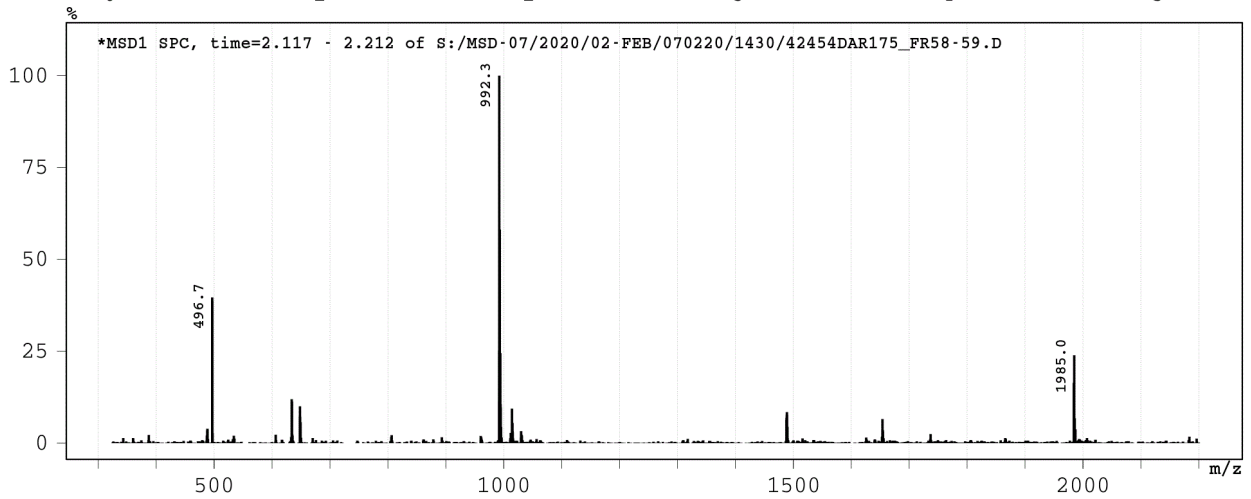

Signal 1: DAD1 A, Sig=220,4 Ref=off

| Peak # | RT [min] | Width [min] | Area  | Area % |
|--------|----------|-------------|-------|--------|
| 1      | 0.365    | 1.76        | 64.5  | 7.2    |
| 2      | 2.146    | 0.12        | 739.8 | 82.1   |
| 3      | 2.206    | 0.07        | 42.0  | 4.7    |
| 4      | 2.326    | 0.08        | 25.7  | 2.9    |
| 5      | 2.382    | 0.11        | 15.3  | 1.7    |
| 6      | 2.827    | 2.73        | 13.7  | 1.5    |

Data File : S:/MSD-07/2020/02-FEB/060220/1429/42454DAR176\_FR2->  
 Injection Date : 06-Feb-20, 20:28:02  
 Sample Name : 42454DAR176\_FR26-27  
 Remarks : Baseline corrected  
 Acq. Method : D:/METHODS/5-95-6M.M  
 column used : Je\_559  
 Analysis Method : C:/CHEM32/1/METHODS/JPT-LCMS.M



Sample Info : 42454\_176-Dr. Martine Darwish H-KVLQKLCQL-OH

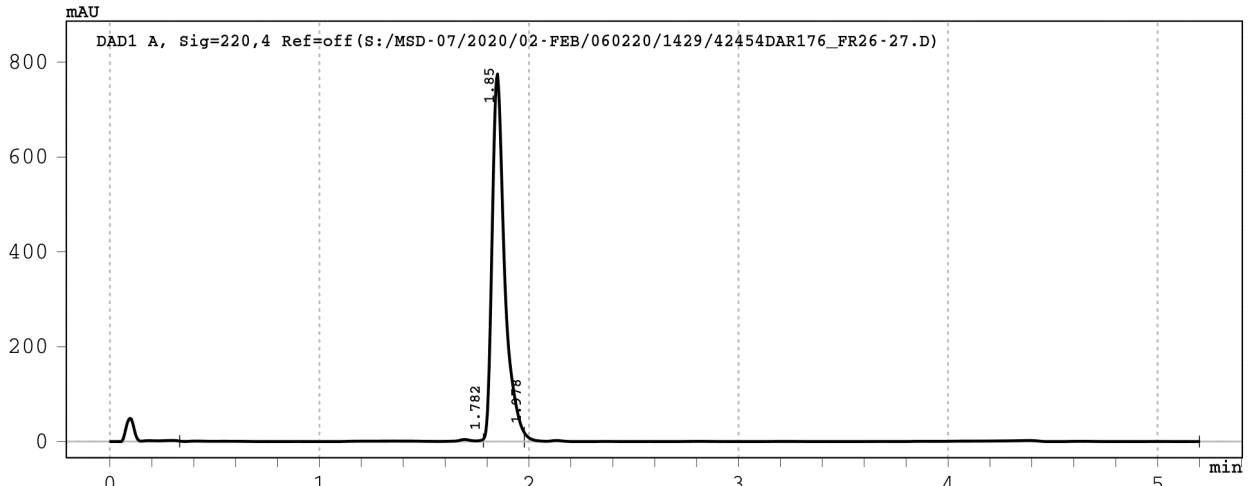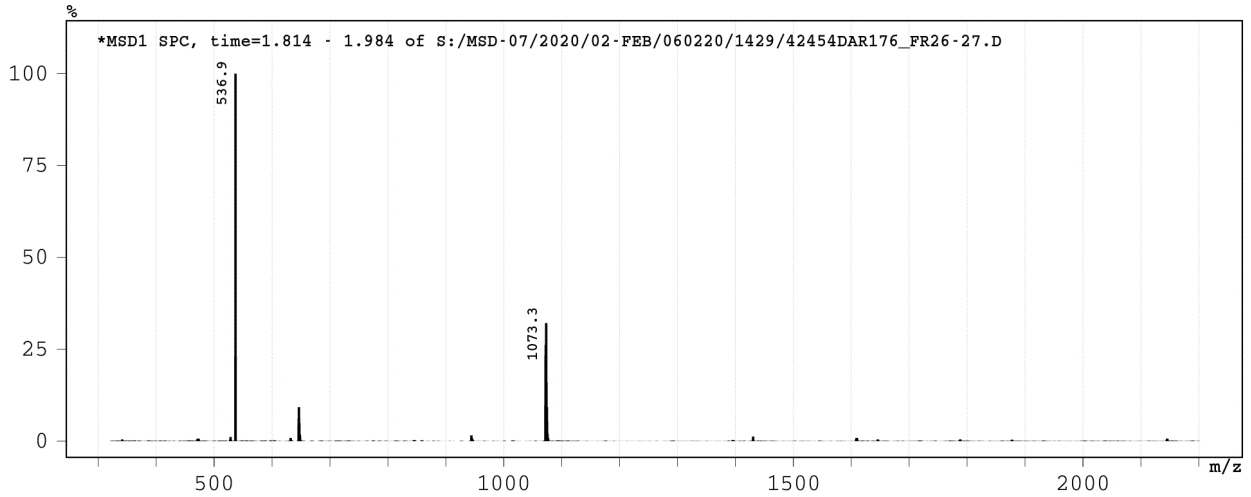

Signal 1: DAD1 A, Sig=220,4 Ref=off

| Peak # | RT [min] | Width [min] | Area   | Area % |
|--------|----------|-------------|--------|--------|
| 1      | 1.782    | 1.45        | 55.5   | 1.7    |
| 2      | 1.850    | 0.20        | 3210.6 | 95.7   |
| 3      | 1.978    | 3.22        | 88.3   | 2.6    |

Data File : S:/MSD-07/2020/02-FEB/060220/1429/42454DAR177\_FR3 ->  
 Injection Date : 06-Feb-20, 20:36:26  
 Sample Name : 42454DAR177\_FR30-31  
 Remarks : Baseline corrected  
 Acq. Method : D:/METHODS/5-95-6M.M  
 column used : Je\_559  
 Analysis Method : C:/CHEM32/1/METHODS/JPT-LCMS.M



Sample Info : 42454\_177-Dr. Martine Darwish H-HSLTNSSSDFM-OH

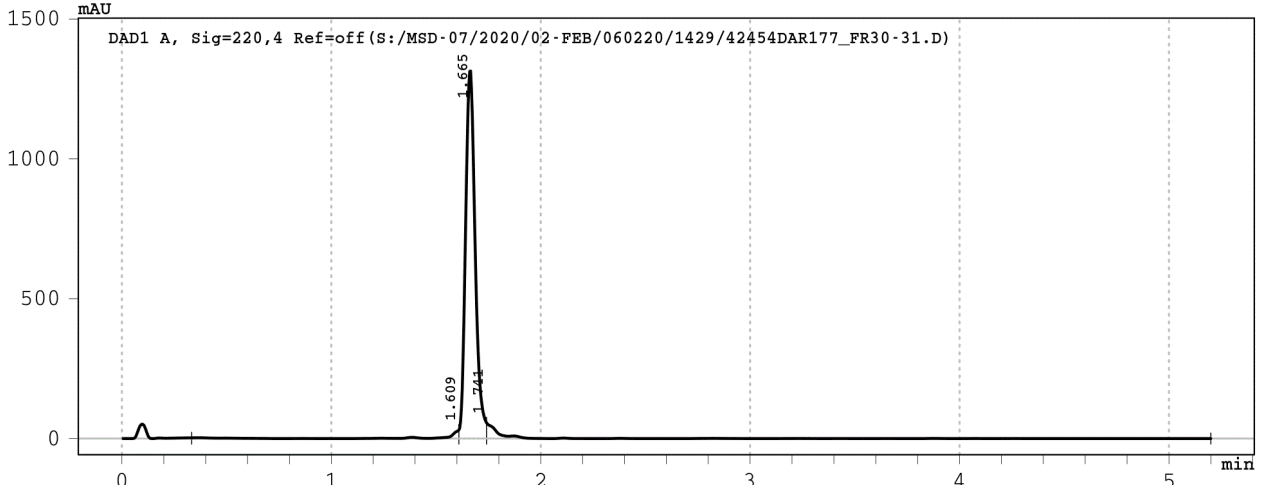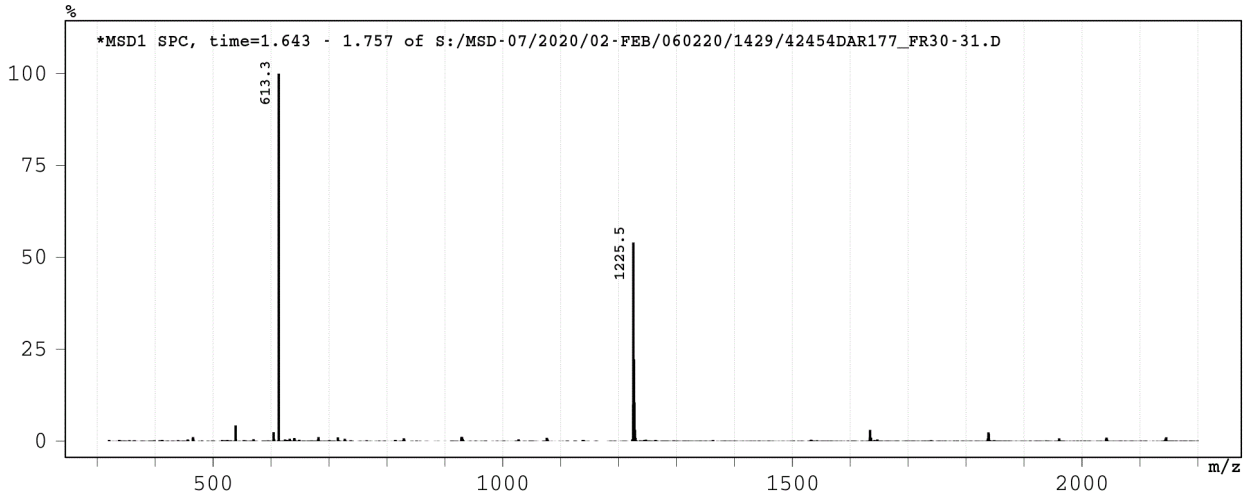

Signal 1: DAD1 A, Sig=220,4 Ref=off

| Peak # | RT [min] | Width [min] | Area   | Area % |
|--------|----------|-------------|--------|--------|
| 1      | 1.609    | 1.28        | 120.5  | 2.6    |
| 2      | 1.665    | 0.13        | 4212.4 | 92.6   |
| 3      | 1.741    | 3.46        | 217.0  | 4.8    |

Data File : S:/MSD-07/2020/02-FEB/070220/1430/42454DAR178\_FR6->  
 Injection Date : 07-Feb-20, 21:02:36  
 Sample Name : 42454DAR178\_FR65-67  
 Remarks : Baseline corrected  
 Acq. Method : D:/METHODS/5-95-6M.M  
 column used : Je\_559  
 Analysis Method : C:/CHEM32/1/METHODS/JPT-LCMS.M



Sample Info : 42454\_178-Dr. Martine Darwish H-AQHHRWQLL-OH

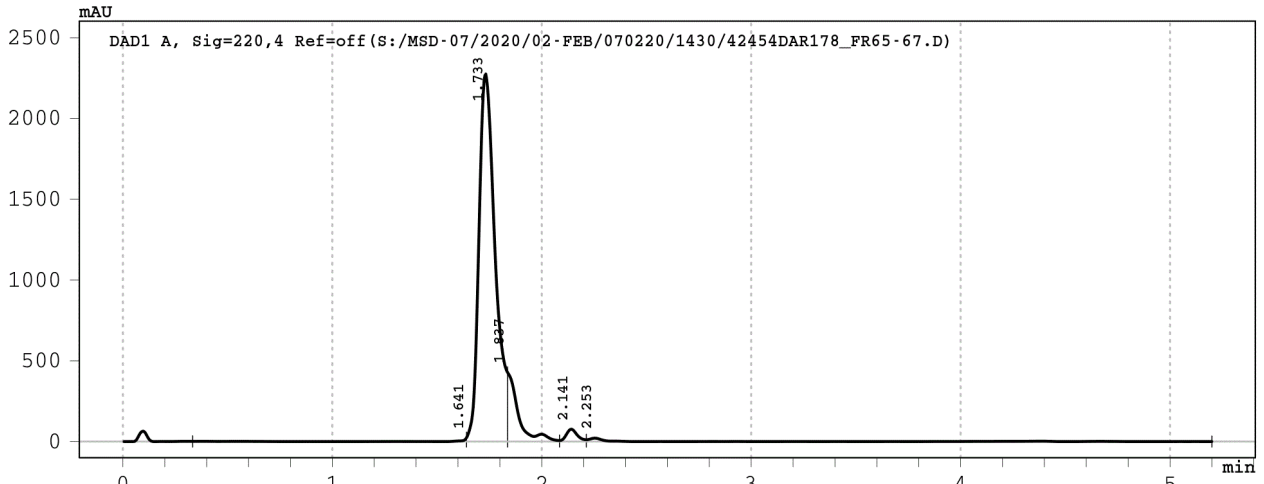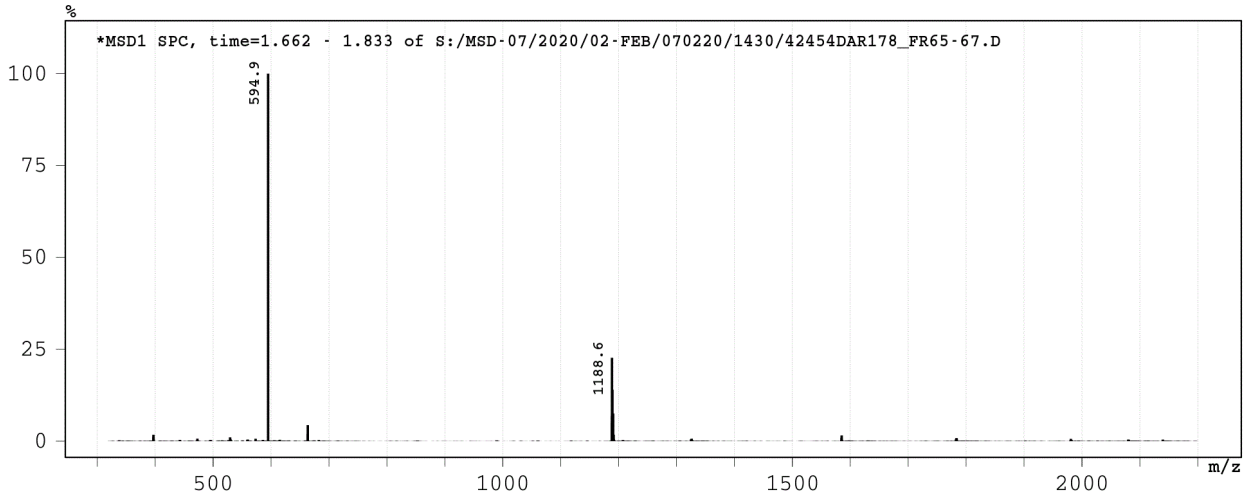

Signal 1: DAD1 A, Sig=220,4 Ref=off

| Peak # | RT [min] | Width [min] | Area    | Area % |
|--------|----------|-------------|---------|--------|
| 1      | 1.641    | 1.31        | 50.7    | 0.4    |
| 2      | 1.733    | 0.20        | 12301.3 | 86.0   |
| 3      | 1.837    | 0.25        | 1506.2  | 10.5   |
| 4      | 2.141    | 0.13        | 284.7   | 2.0    |
| 5      | 2.253    | 2.99        | 152.8   | 1.1    |

Data File : S:/MSD-07/2020/02-FEB/060220/1429/42454DAR179\_FR3 ->



Injection Date : 06-Feb-20, 20:44:48  
Sample Name : 42454DAR179\_FR37-39  
Remarks : Baseline corrected  
Acq. Method : D:/METHODS/5-95-6M.M  
column used : Je\_559  
Analysis Method : C:/CHEM32/1/METHODS/JPT-LCMS.M

Sample Info : 42454\_179-Dr. Martine Darwish H-MQQLNPEFV-OH

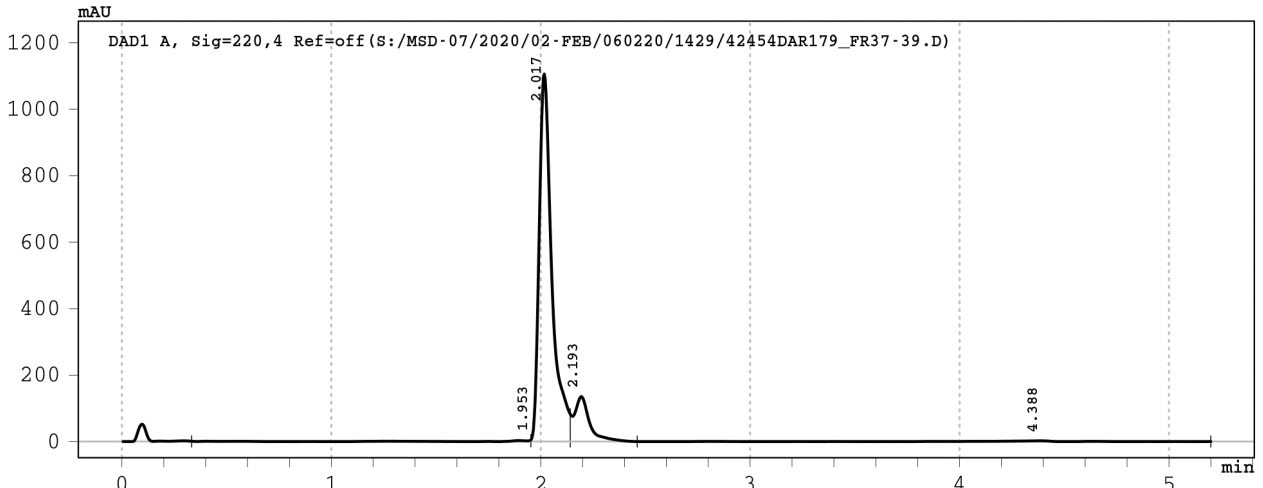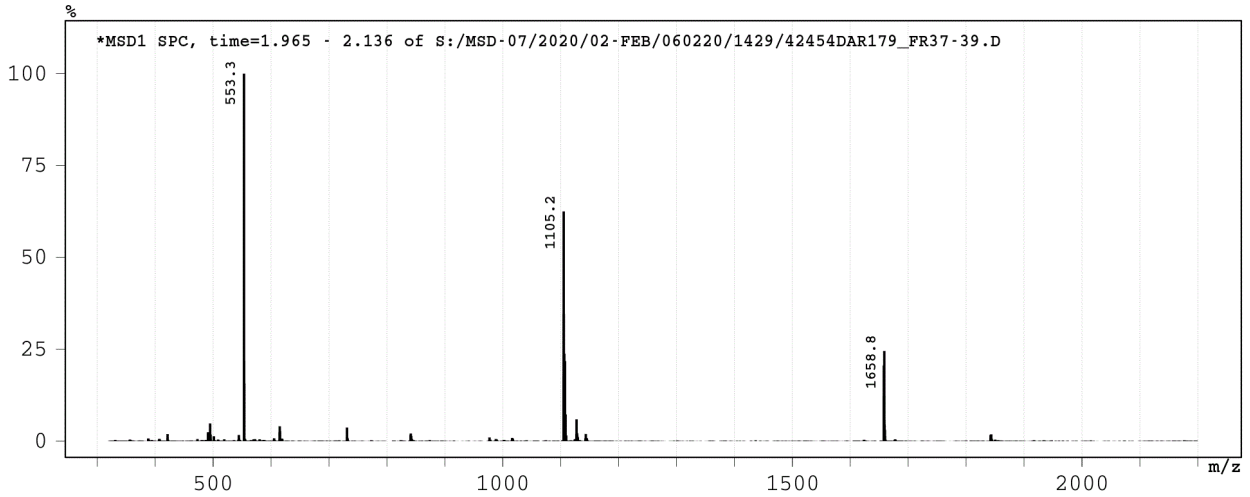

Signal 1: DAD1 A, Sig=220,4 Ref=off

| Peak # | RT [min] | Width [min] | Area   | Area % |
|--------|----------|-------------|--------|--------|
| 1      | 1.953    | 1.62        | 45.7   | 0.8    |
| 2      | 2.017    | 0.19        | 4683.9 | 85.6   |
| 3      | 2.193    | 0.32        | 700.8  | 12.8   |
| 4      | 4.388    | 2.74        | 44.1   | 0.8    |



Data File : S:/MSD-07/2020/02-FEB/070220/1430/42454DAR180\_FR8->  
 Injection Date : 07-Feb-20, 21:10:59  
 Sample Name : 42454DAR180\_FR83-84  
 Remarks : Baseline corrected  
 Acq. Method : D:/METHODS/5-95-6M.M  
 column used : Je\_559  
 Analysis Method : C:/CHEM32/1/METHODS/JPT-LCMS.M



Sample Info : 42454\_180-Dr. Martine Darwish H-LSASRYALL-OH

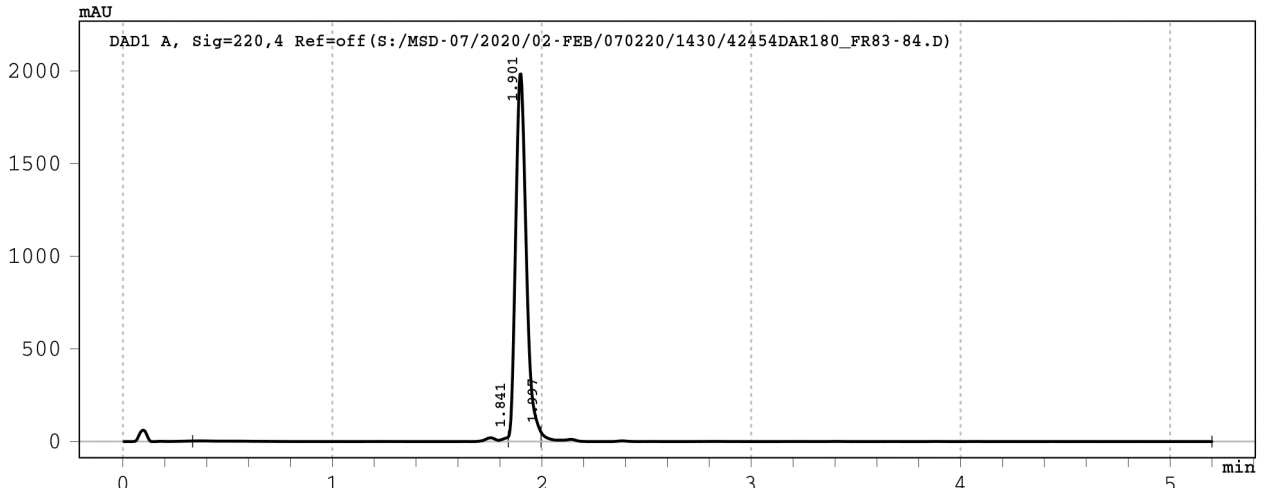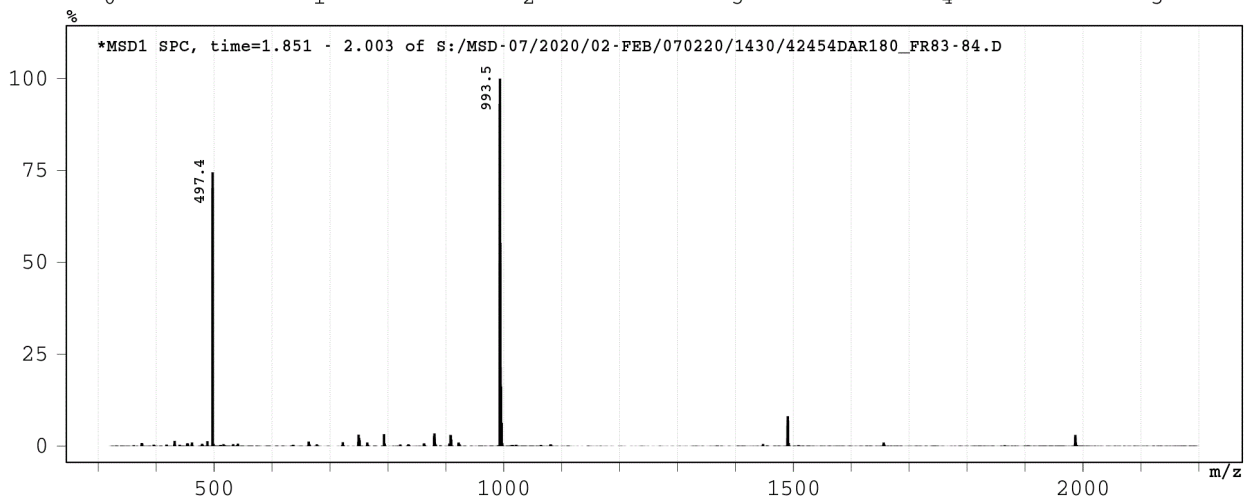

Signal 1: DAD1 A, Sig=220,4 Ref=off

| Peak # | RT [min] | Width [min] | Area   | Area % |
|--------|----------|-------------|--------|--------|
| 1      | 1.841    | 1.51        | 161.2  | 2.2    |
| 2      | 1.901    | 0.16        | 7014.3 | 95.5   |
| 3      | 1.997    | 3.20        | 168.2  | 2.3    |

Data File : S:/MSD-07/2020/02-FEB/110220/1433/42454DAR181\_FR7->  
 Injection Date : 12-Feb-20, 01:43:48  
 Sample Name : 42454DAR181\_FR79-81  
 Remarks : Baseline corrected  
 Acq. Method : D:/METHODS/5-95-6M.M  
 column used : Je\_559  
 Analysis Method : C:/CHEM32/1/METHODS/JPT-LCMS.M



Sample Info : 42454\_181-Dr. Martine Darwish H-SSIKVVGL-OH

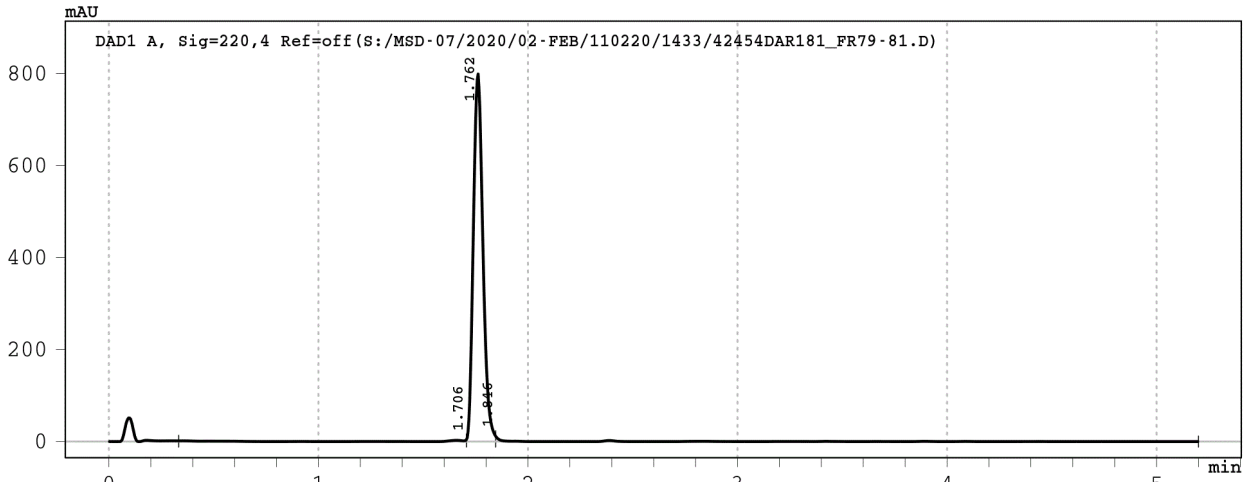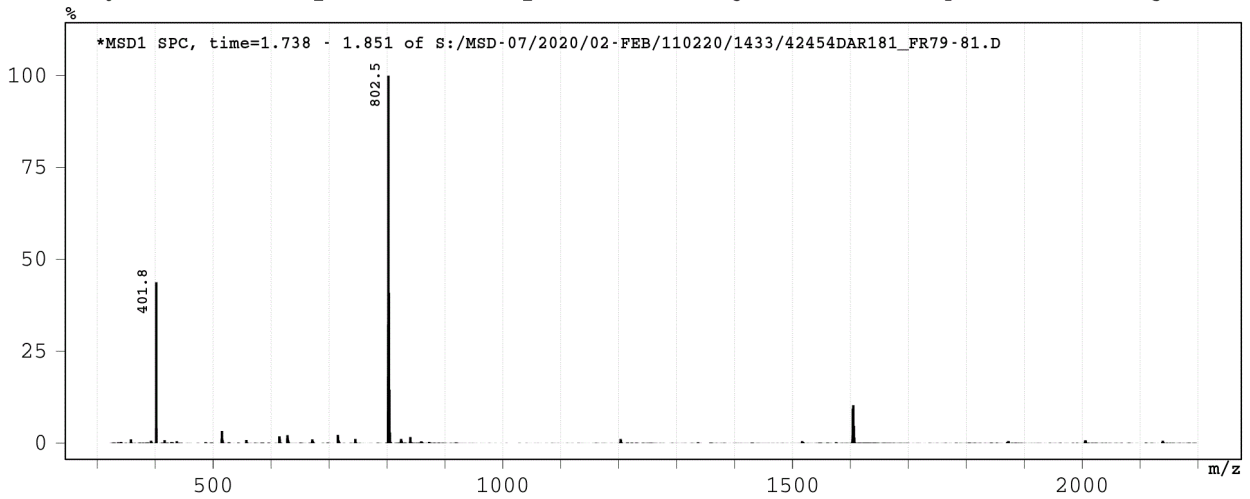

Signal 1: DAD1 A, Sig=220,4 Ref=off

| Peak # | RT [min] | Width [min] | Area   | Area % |
|--------|----------|-------------|--------|--------|
| 1      | 1.706    | 1.37        | 32.6   | 1.3    |
| 2      | 1.762    | 0.14        | 2538.2 | 97.4   |
| 3      | 1.846    | 3.35        | 34.5   | 1.3    |

Data File : S:/MSD-07/2020/02-FEB/110220/1433/42454DAR182\_FR6->

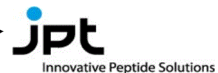

Injection Date : 12-Feb-20, 01:52:15  
Sample Name : 42454DAR182\_FR6-7  
Remarks : Baseline corrected  
Acq. Method : D:/METHODS/5-95-6M.M  
column used : Je\_559  
Analysis Method : C:/CHEM32/1/METHODS/JPT-LCMS.M

Sample Info : 42454\_182-Dr. Martine Darwish H-TGSVFGELOH

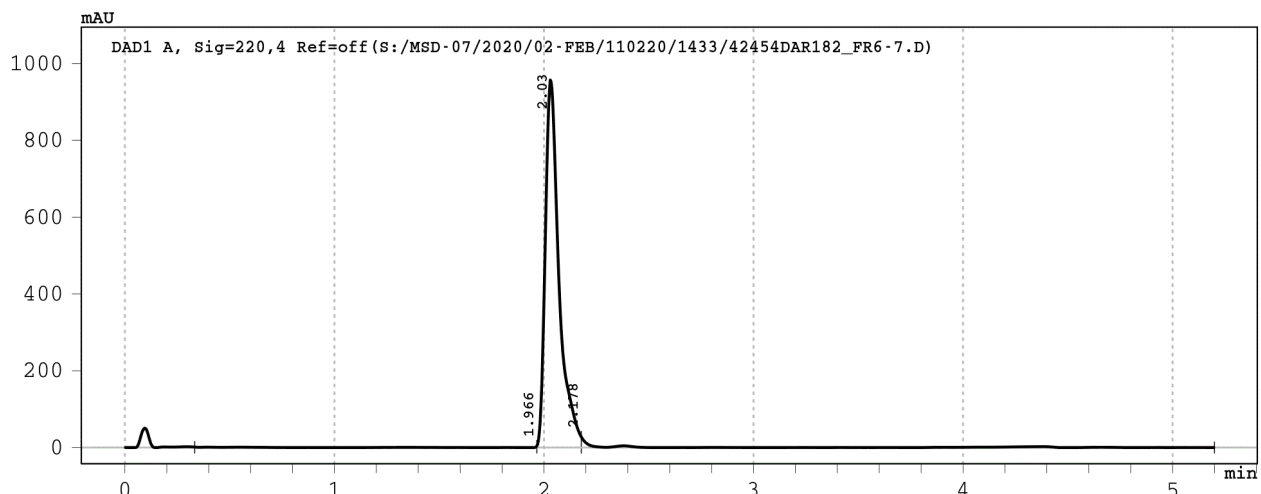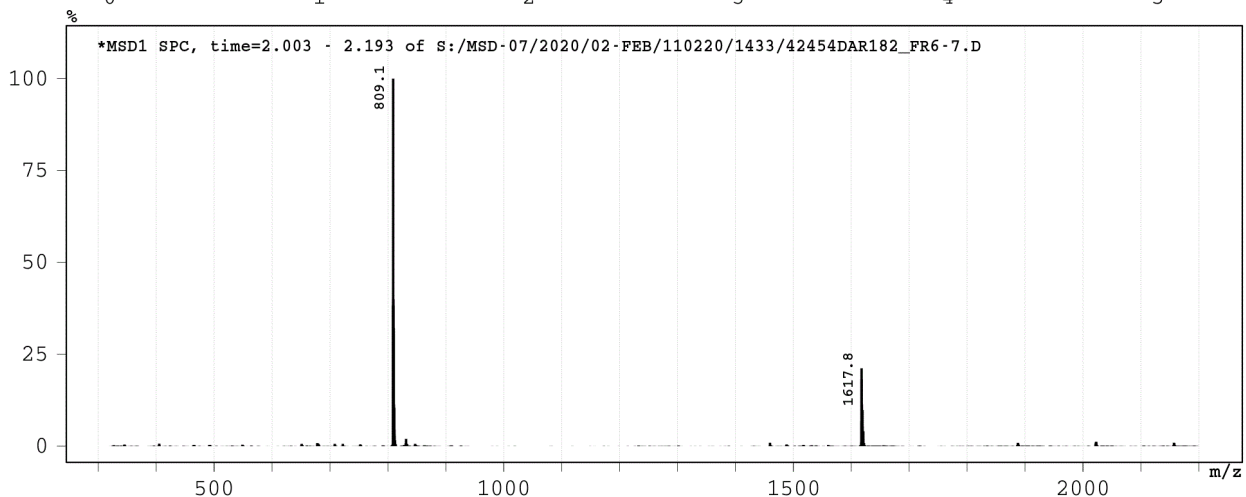

Signal 1: DAD1 A, Sig=220,4 Ref=off

| Peak # | RT [min] | Width [min] | Area   | Area % |
|--------|----------|-------------|--------|--------|
| 1      | 1.966    | 1.63        | 26.5   | 0.6    |
| 2      | 2.030    | 0.21        | 4355.1 | 96.6   |
| 3      | 2.178    | 3.02        | 127.1  | 2.8    |

Data File : S:/MSD-07/2020/02-FEB/110220/1433/42454DAR183\_FR1->



Injection Date : 12-Feb-20, 02:00:39  
Sample Name : 42454DAR183\_FR12  
Remarks : Baseline corrected  
Acq. Method : D:/METHODS/5-95-6M.M  
column used : Je\_559  
Analysis Method : C:/CHEM32/1/METHODS/JPT-LCMS.M

Sample Info : 42454\_183-Dr. Martine Darwish H-LGVLFSQL-OH

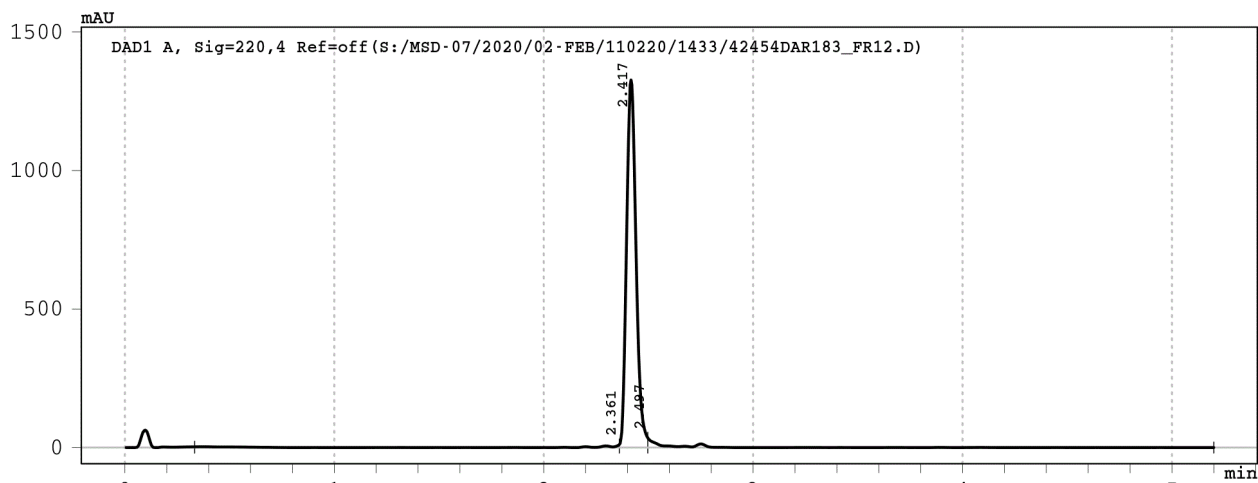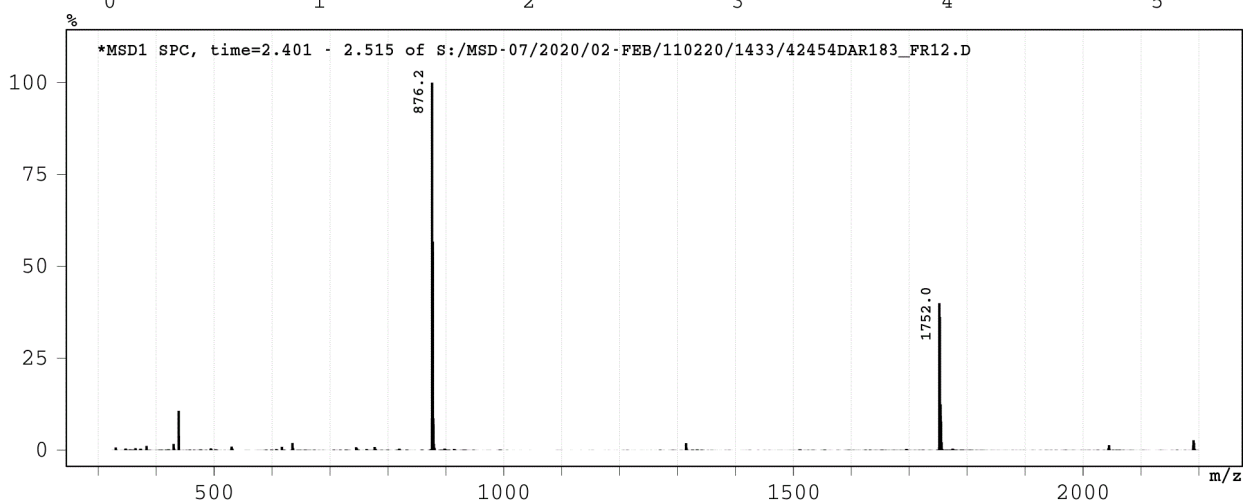

Signal 1: DAD1 A, Sig=220,4 Ref=off

| Peak # | RT [min] | Width [min] | Area   | Area % |
|--------|----------|-------------|--------|--------|
| 1      | 2.361    | 2.03        | 81.7   | 1.8    |
| 2      | 2.417    | 0.14        | 4179.3 | 94.6   |
| 3      | 2.497    | 2.70        | 158.9  | 3.6    |

Data File : S:/MSD-07/2020/02-FEB/060220/1429/42454DAR184\_FR4->



Injection Date : 06-Feb-20, 20:53:12  
Sample Name : 42454DAR184\_FR47-48  
Remarks : Baseline corrected  
Acq. Method : D:/METHODS/5-95-6M.M  
column used : Je\_559  
Analysis Method : C:/CHEM32/1/METHODS/JPT-LCMS.M

Sample Info : 42454\_184-Dr. Martine Darwish H-LFFPCSNPL-OH

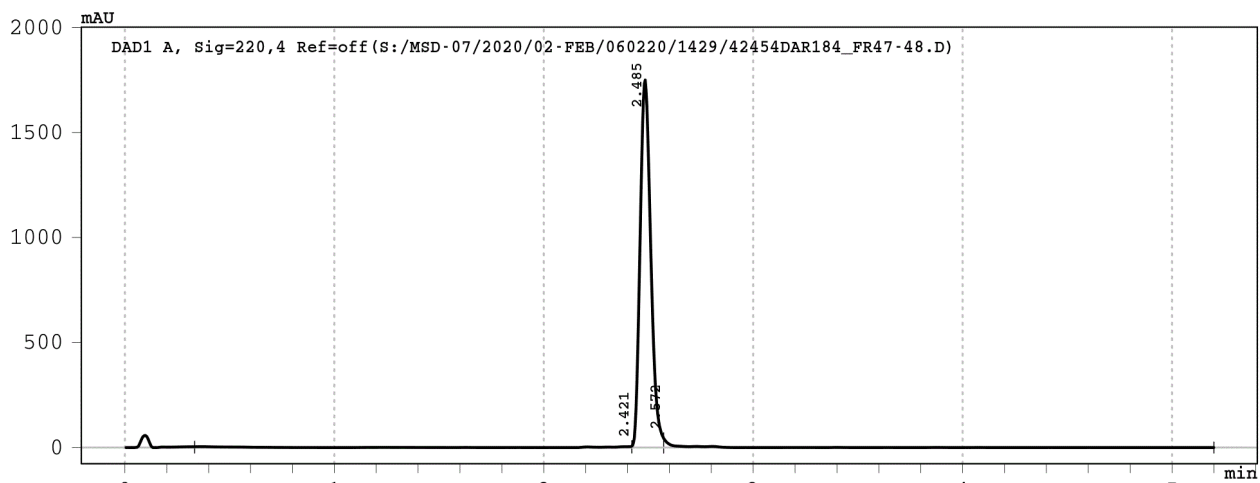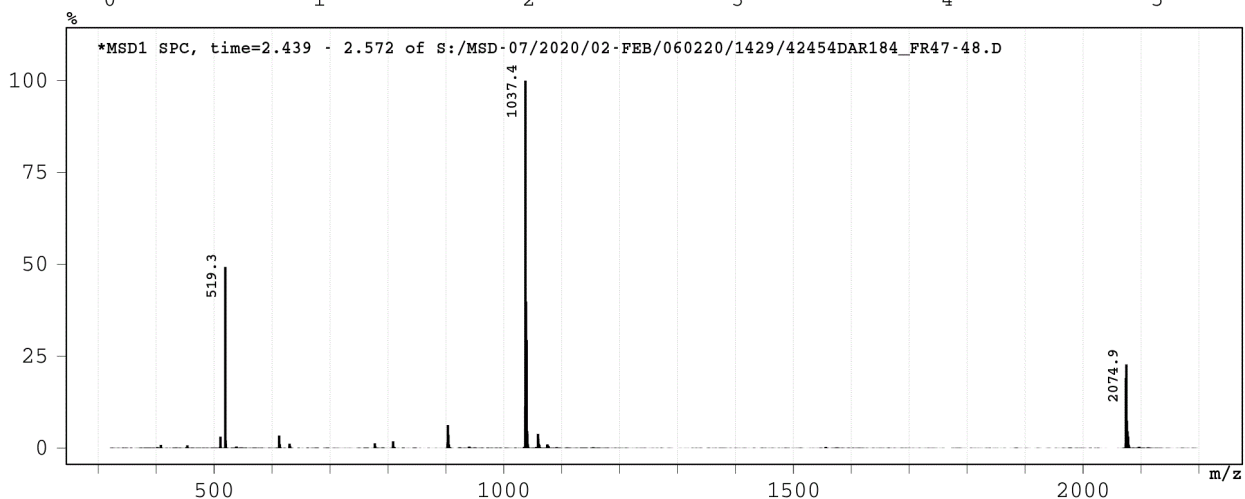

Signal 1: DAD1 A, Sig=220,4 Ref=off

| Peak # | RT [min] | Width [min] | Area   | Area % |
|--------|----------|-------------|--------|--------|
| 1      | 2.421    | 2.09        | 107.4  | 1.7    |
| 2      | 2.485    | 0.15        | 6197.6 | 96.2   |
| 3      | 2.572    | 2.63        | 135.1  | 2.1    |

Data File : S:/MSD-07/2020/02-FEB/070220/1430/42454DAR185\_FR7->  
 Injection Date : 07-Feb-20, 21:19:24  
 Sample Name : 42454DAR185\_FR7-9  
 Remarks : Baseline corrected  
 Acq. Method : D:/METHODS/5-95-6M.M  
 column used : Je\_559  
 Analysis Method : C:/CHEM32/1/METHODS/JPT-LCMS.M



Sample Info : 42454\_185-Dr. Martine Darwish H-SNLNRRNATV-OH

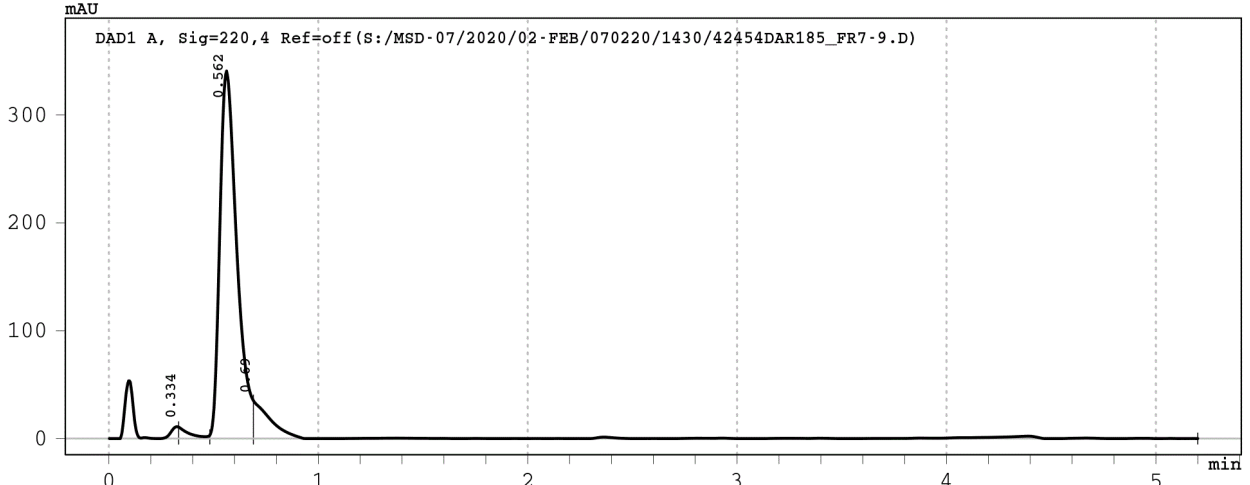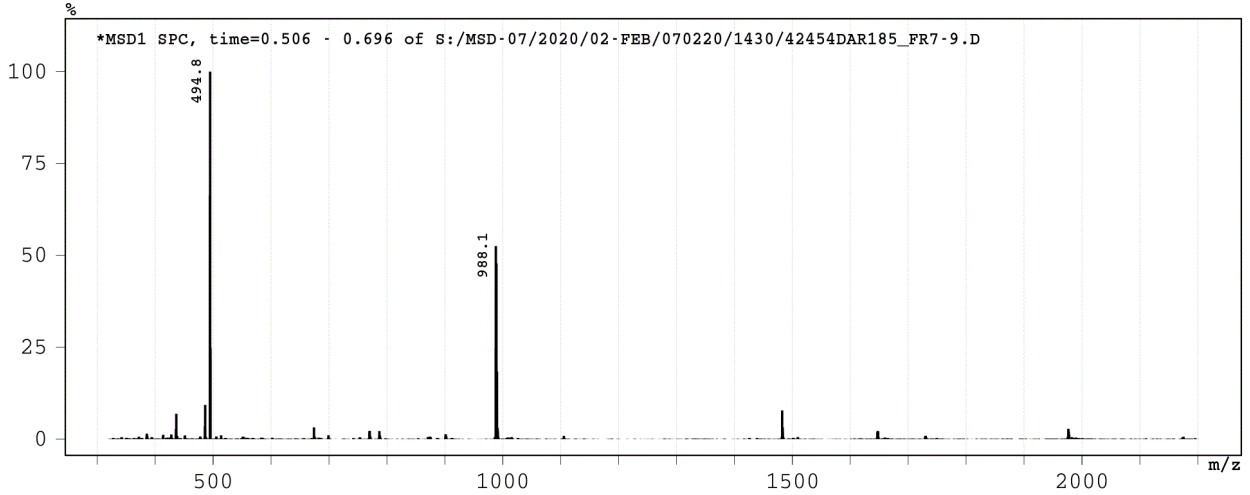

Signal 1: DAD1 A, Sig=220,4 Ref=off

| Peak # | RT [min] | Width [min] | Area   | Area % |
|--------|----------|-------------|--------|--------|
| 1      | 0.334    | 0.15        | 37.0   | 1.7    |
| 2      | 0.562    | 0.21        | 1922.6 | 86.7   |
| 3      | 0.690    | 4.51        | 257.0  | 11.6   |

Data File : S:/MSD-07/2020/02-FEB/140220/1435/42454DAR186\_FR7->  
 Injection Date : 15-Feb-20, 00:51:56  
 Sample Name : 42454DAR186\_FR7-8  
 Remarks : Baseline corrected  
 Acq. Method : D:/METHODS/5-95-6M.M  
 column used : Je\_559  
 Analysis Method : C:/CHEM32/1/METHODS/JPT-LCMS.M



Sample Info : 42454\_186-Dr. Martine Darwish H-LGSIFSTL-OH

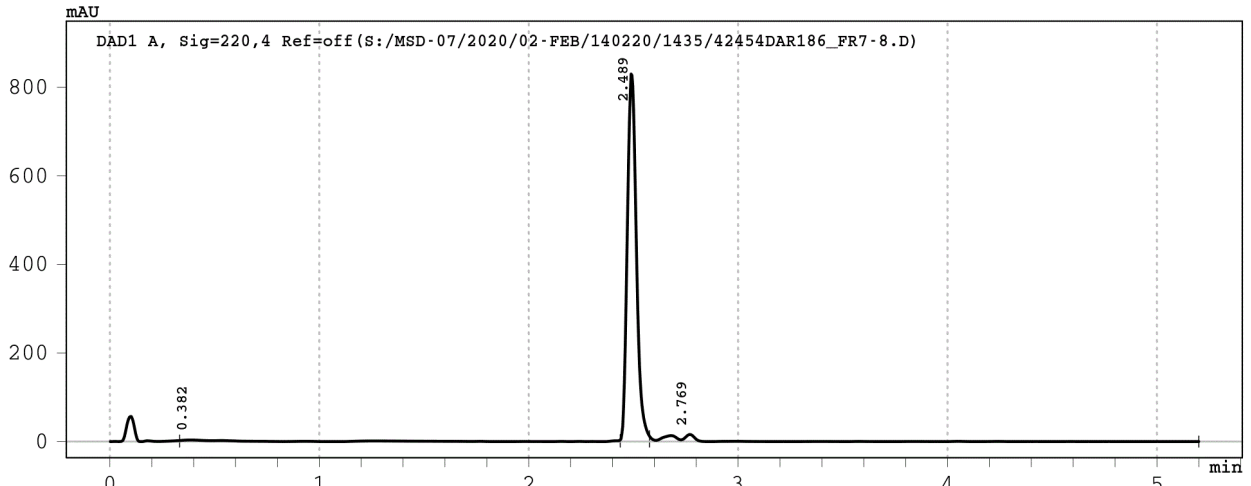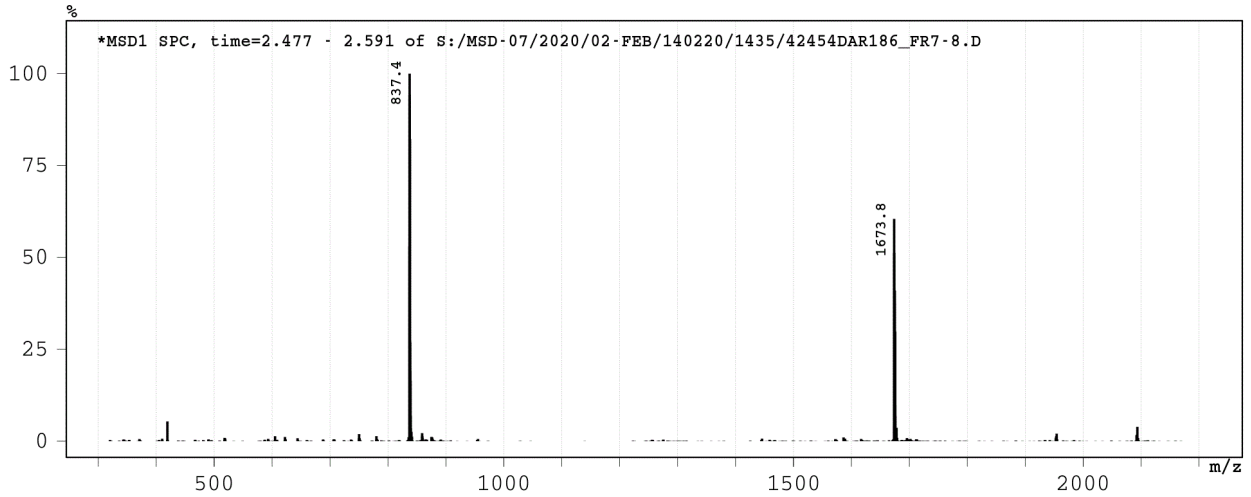

Signal 1: DAD1 A, Sig=220,4 Ref=off

| Peak # | RT [min] | Width [min] | Area   | Area % |
|--------|----------|-------------|--------|--------|
| 1      | 0.382    | 2.10        | 88.3   | 3.2    |
| 2      | 2.489    | 0.14        | 2521.6 | 91.9   |
| 3      | 2.769    | 2.62        | 132.9  | 4.8    |

Data File : S:/MSD-07/2020/02-FEB/070220/1430/42454DAR187\_FR1->

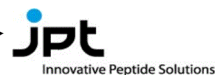

Injection Date : 07-Feb-20, 21:36:11  
Sample Name : 42454DAR187\_FR13-15  
Remarks : Baseline corrected  
Acq. Method : D:/METHODS/5-95-6M.M  
column used : Je\_559  
Analysis Method : C:/CHEM32/1/METHODS/JPT-LCMS.M

Sample Info : 42454\_187-Dr. Martine Darwish H-HSFVYVSGF-OH

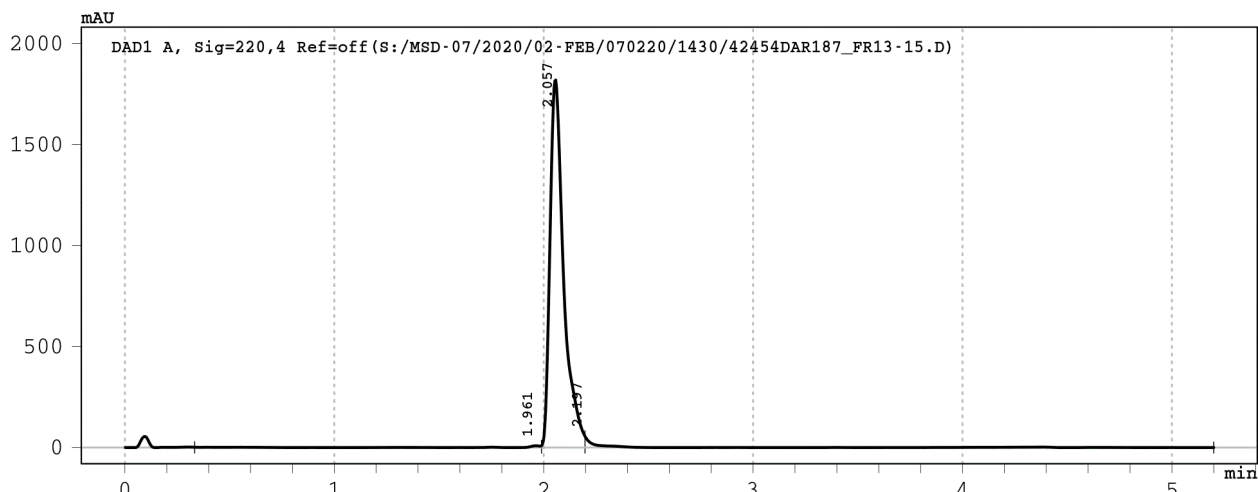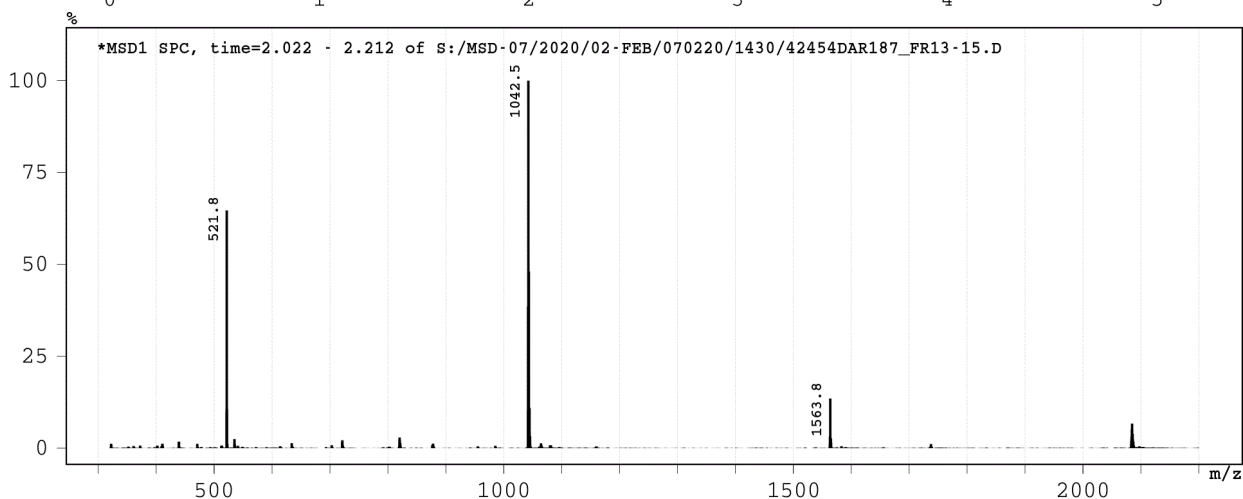

Signal 1: DAD1 A, Sig=220,4 Ref=off

| Peak # | RT [min] | Width [min] | Area   | Area % |
|--------|----------|-------------|--------|--------|
| 1      | 1.961    | 1.66        | 68.9   | 0.8    |
| 2      | 2.057    | 0.21        | 8269.3 | 96.7   |
| 3      | 2.197    | 3.00        | 216.5  | 2.5    |



Data File : S:/MSD-07/2020/02-FEB/060220/1429/42454DAR188\_FR5->



Injection Date : 06-Feb-20, 21:01:34  
Sample Name : 42454DAR188\_FR52-53  
Remarks : Baseline corrected  
Acq. Method : D:/METHODS/5-95-6M.M  
column used : Je\_559  
Analysis Method : C:/CHEM32/1/METHODS/JPT-LCMS.M

Sample Info : 42454\_188-Dr. Martine Darwish H-PNAGFMSQL-OH

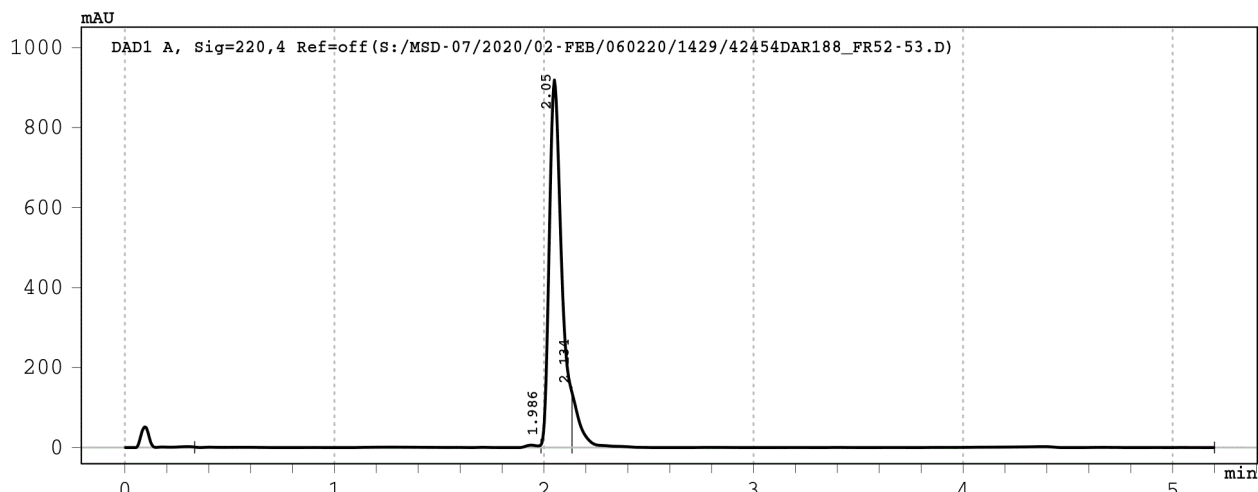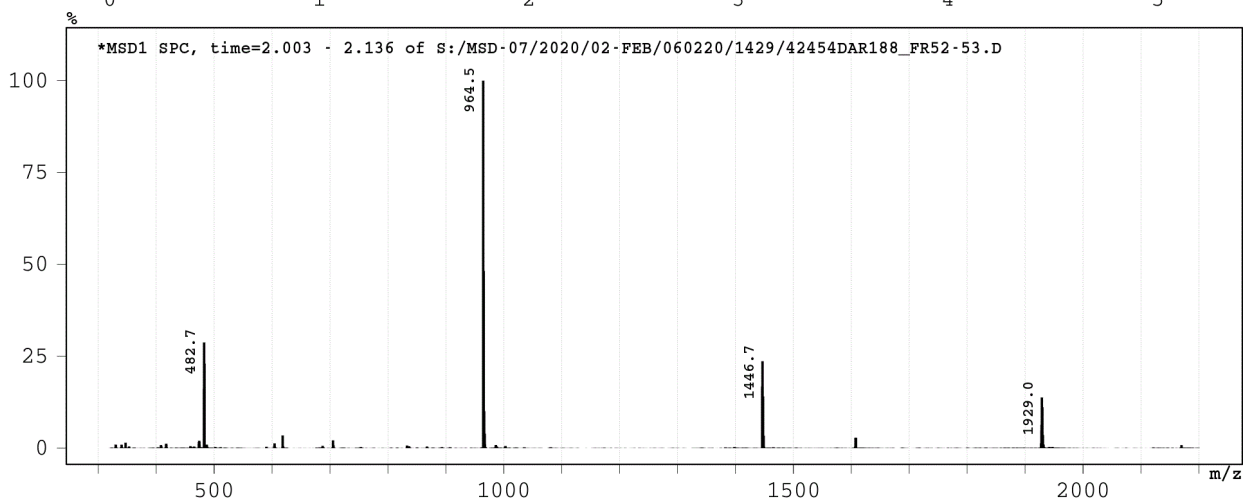

Signal 1: DAD1 A, Sig=220,4 Ref=off

| Peak # | RT [min] | Width [min] | Area   | Area % |
|--------|----------|-------------|--------|--------|
| 1      | 1.986    | 1.65        | 56.2   | 1.3    |
| 2      | 2.050    | 0.15        | 3734.8 | 88.6   |
| 3      | 2.134    | 3.07        | 423.1  | 10.0   |

Data File : S:/MSD-07/2020/02-FEB/060220/1429/42454DAR189\_FR6->  
Injection Date : 06-Feb-20, 21:09:56  
Sample Name : 42454DAR189\_FR60-61  
Remarks : Baseline corrected  
Acq. Method : D:/METHODS/5-95-6M.M  
column used : Je\_559  
Analysis Method : C:/CHEM32/1/METHODS/JPT-LCMS.M



Sample Info : 42454\_189-Dr. Martine Darwish H-SWGLCSNL-OH

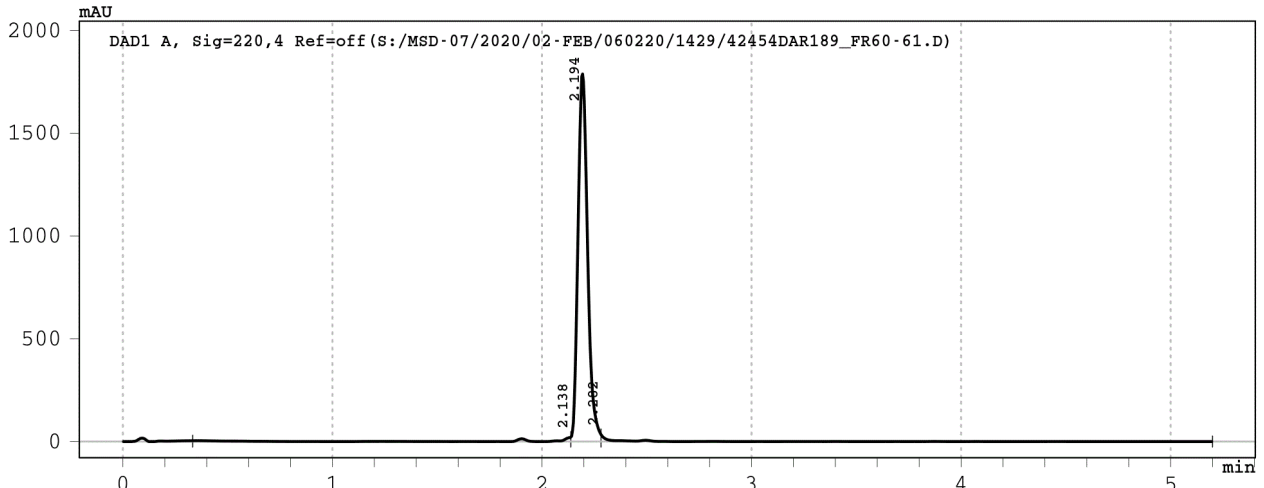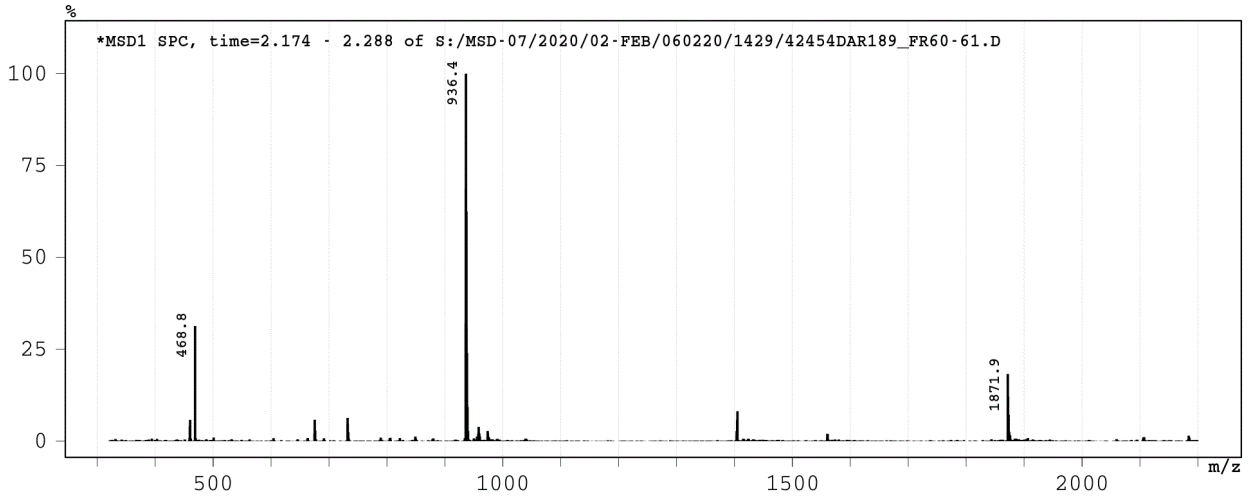

Signal 1: DAD1 A, Sig=220,4 Ref=off

| Peak # | RT [min] | Width [min] | Area   | Area % |
|--------|----------|-------------|--------|--------|
| 1      | 2.138    | 1.80        | 146.8  | 2.5    |
| 2      | 2.194    | 0.14        | 5719.3 | 95.8   |
| 3      | 2.282    | 2.92        | 101.6  | 1.7    |

Data File : S:/MSD-07/2020/02-FEB/110220/1433/42454DAR190\_FR2->



Injection Date : 12-Feb-20, 02:09:04  
Sample Name : 42454DAR190\_FR22-24  
Remarks : Baseline corrected  
Acq. Method : D:/METHODS/5-95-6M.M  
column used : Je\_559  
Analysis Method : C:/CHEM32/1/METHODS/JPT-LCMS.M

Sample Info : 42454\_190-Dr. Martine Darwish H-IHPVMSTL-OH

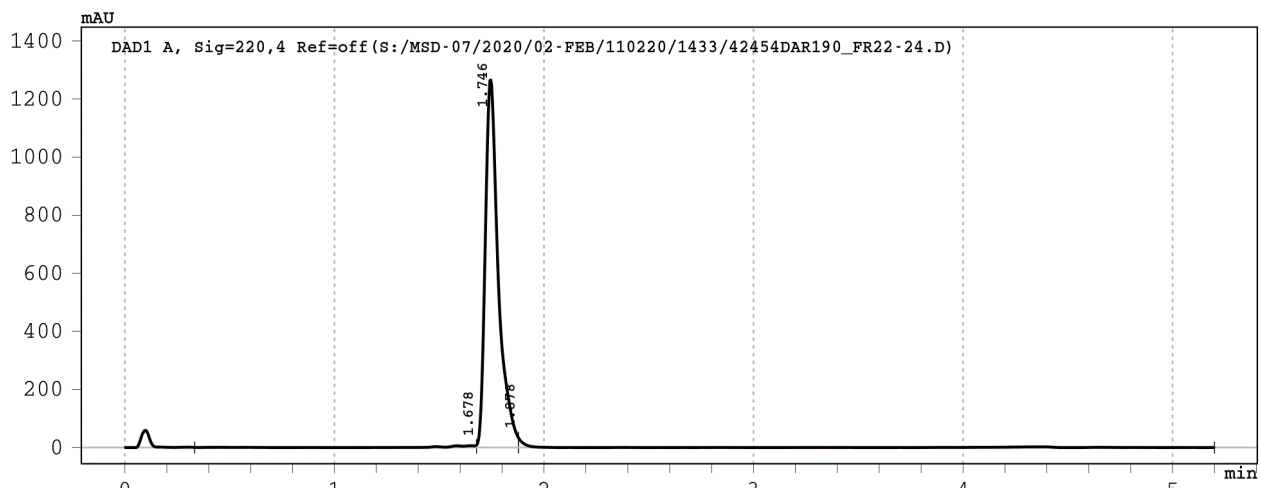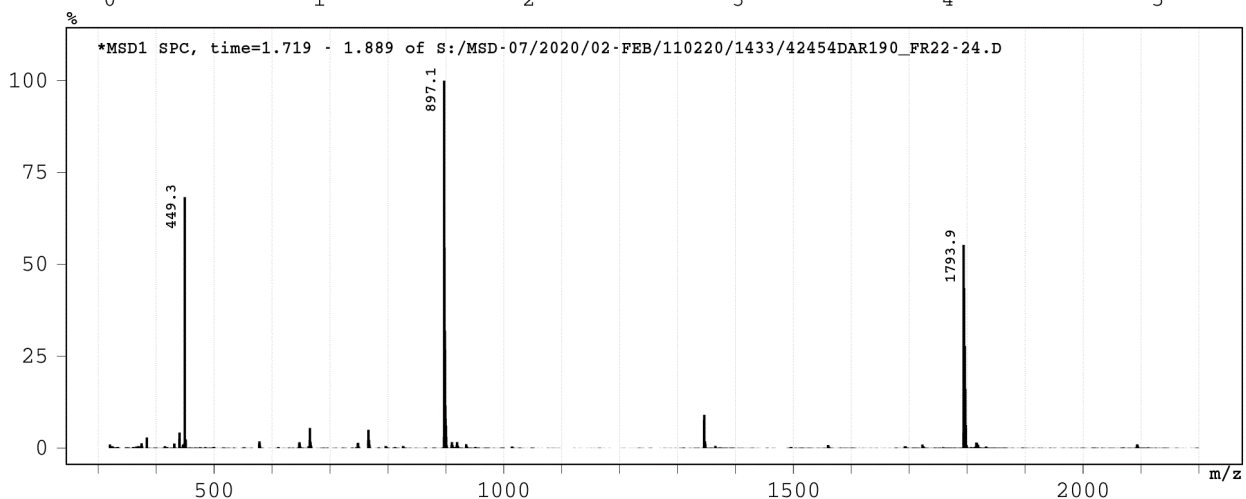

Signal 1: DAD1 A, Sig=220,4 Ref=off

| Peak # | RT [min] | Width [min] | Area   | Area % |
|--------|----------|-------------|--------|--------|
| 1      | 1.678    | 1.34        | 69.5   | 1.2    |
| 2      | 1.746    | 0.20        | 5490.0 | 96.7   |
| 3      | 1.878    | 3.32        | 115.1  | 2.0    |

Data File : S:/MSD-07/2020/02-FEB/100220/1432/42454DAR191\_FR6 ->  
 Injection Date : 10-Feb-20, 18:17:13  
 Sample Name : 42454DAR191\_FR6  
 Remarks : Baseline corrected  
 Acq. Method : D:/METHODS/5-95-6M.M  
 column used : Je\_559  
 Analysis Method : C:/CHEM32/1/METHODS/JPT-LCMS.M



Sample Info : 42454\_191-Dr. Martine Darwish H-RAWKNHKAYI-OH

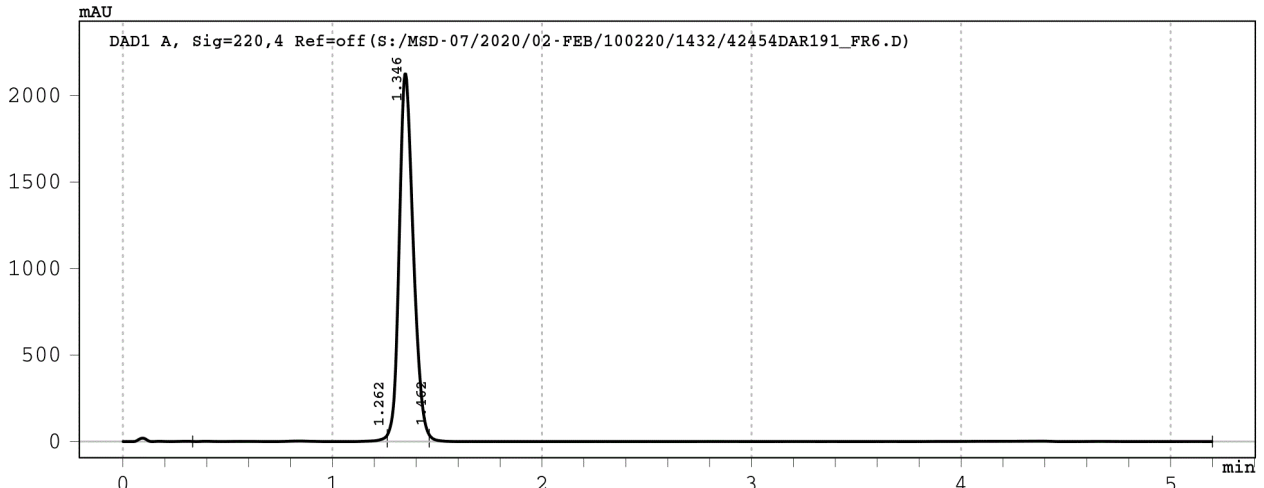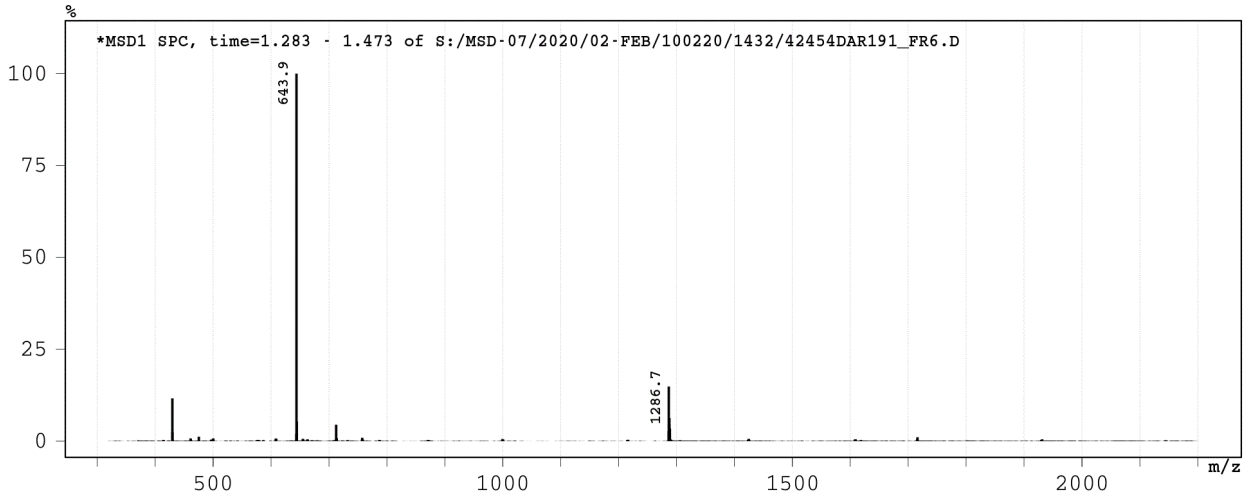

Signal 1: DAD1 A, Sig=220,4 Ref=off

| Peak # | RT [min] | Width [min] | Area   | Area % |
|--------|----------|-------------|--------|--------|
| 1      | 1.262    | 0.93        | 92.2   | 0.9    |
| 2      | 1.346    | 0.20        | 9939.1 | 98.0   |
| 3      | 1.462    | 3.74        | 109.8  | 1.1    |

Data File : S:/MSD-07/2020/02-FEB/100220/1432/42454DAR192\_FR2->  
 Injection Date : 10-Feb-20, 18:25:34  
 Sample Name : 42454DAR192\_FR27-28  
 Remarks : Baseline corrected  
 Acq. Method : D:/METHODS/5-95-6M.M  
 column used : Je\_559  
 Analysis Method : C:/CHEM32/1/METHODS/JPT-LCMS.M



Sample Info : 42454\_192-Dr. Martine Darwish H-SAVDFKLHI-OH

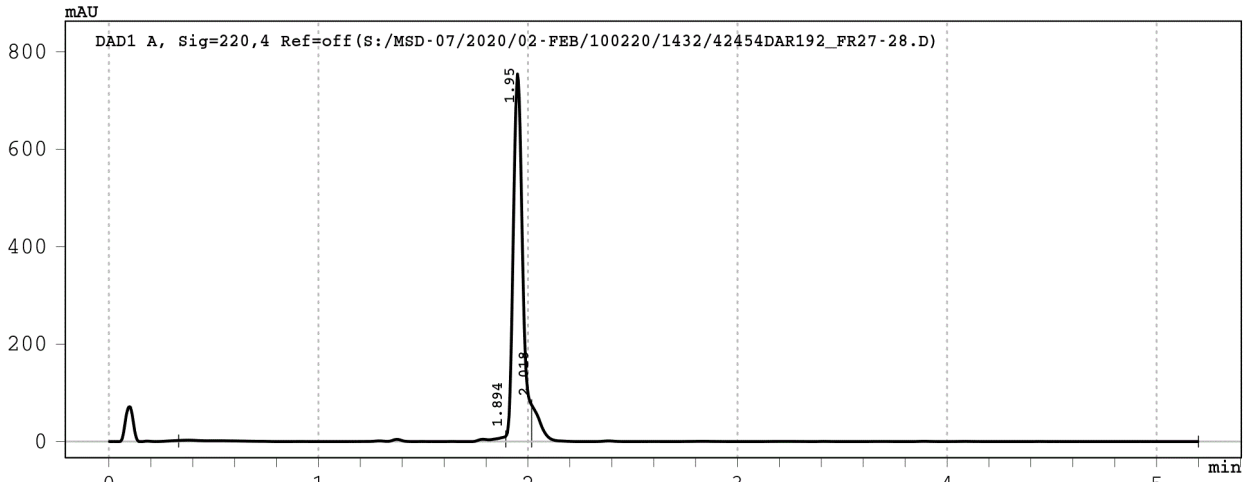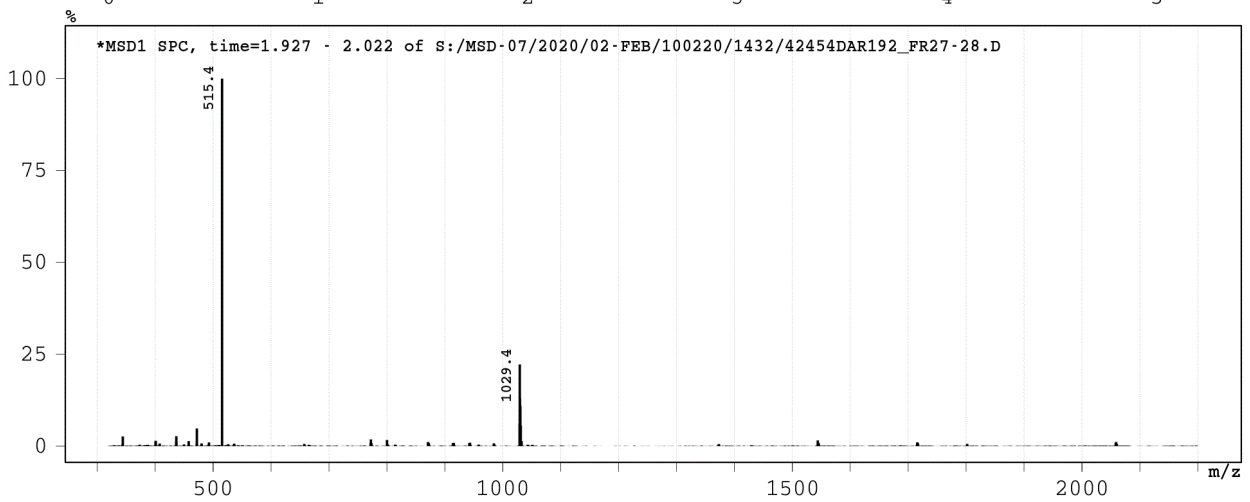

Signal 1: DAD1 A, Sig=220,4 Ref=off

| Peak # | RT [min] | Width [min] | Area   | Area % |
|--------|----------|-------------|--------|--------|
| 1      | 1.894    | 1.56        | 99.9   | 3.8    |
| 2      | 1.950    | 0.12        | 2326.1 | 87.9   |
| 3      | 2.018    | 3.18        | 221.0  | 8.3    |

Data File : S:/MSD-07/2020/02-FEB/100220/1432/42454DAR193\_FR4->  
 Injection Date : 10-Feb-20, 18:42:21  
 Sample Name : 42454DAR193\_FR46  
 Remarks : Baseline corrected  
 Acq. Method : D:/METHODS/5-95-6M.M  
 column used : Je\_559  
 Analysis Method : C:/CHEM32/1/METHODS/JPT-LCMS.M



Sample Info : 42454\_193-Dr. Martine Darwish H-HGYERYPAL-OH

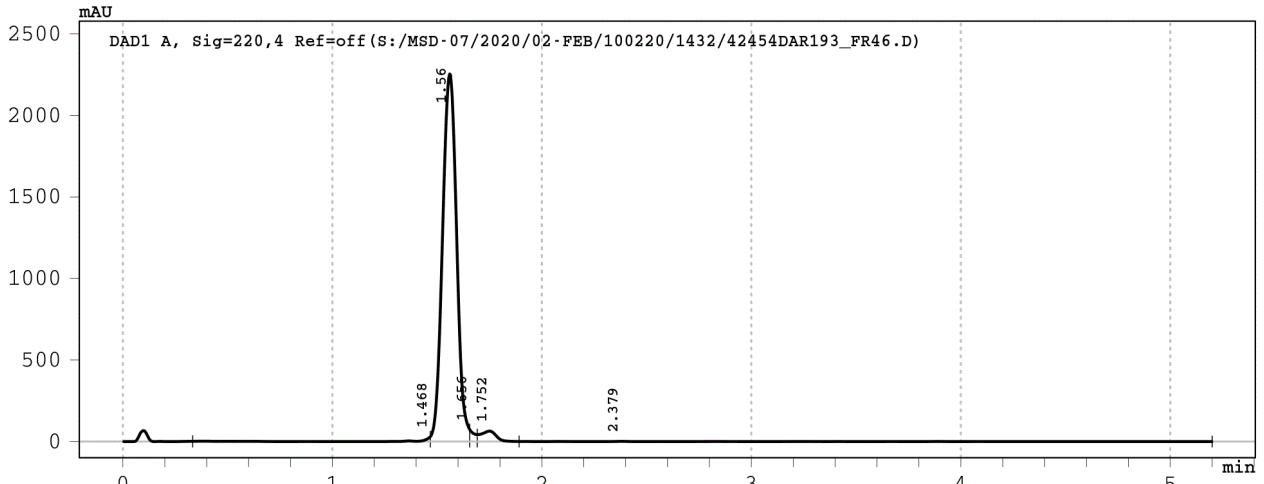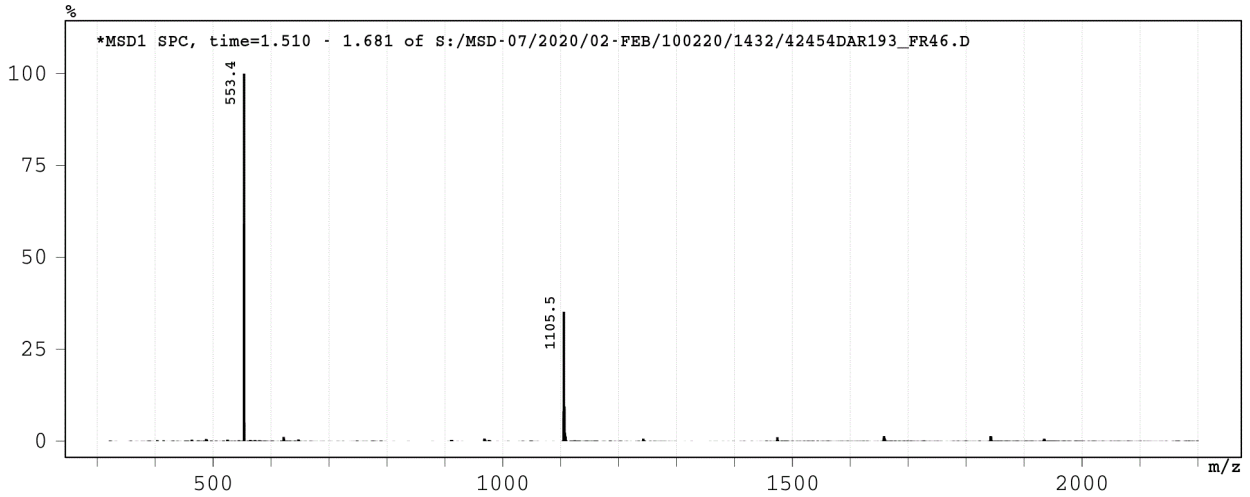

Signal 1: DAD1 A, Sig=220,4 Ref=off

| Peak # | RT [min] | Width [min] | Area    | Area % |
|--------|----------|-------------|---------|--------|
| 1      | 1.468    | 1.13        | 82.8    | 0.7    |
| 2      | 1.560    | 0.19        | 10545.9 | 95.1   |
| 3      | 1.656    | 0.04        | 112.9   | 1.0    |
| 4      | 1.752    | 0.20        | 328.9   | 3.0    |
| 5      | 2.379    | 3.31        | 19.5    | 0.2    |

Data File : S:/MSD-07/2020/02-FEB/100220/1432/42454DAR194\_FR5->



Injection Date : 10-Feb-20, 18:50:44  
Sample Name : 42454DAR194\_FR57-58  
Remarks : Baseline corrected  
Acq. Method : D:/METHODS/5-95-6M.M  
column used : Je\_559  
Analysis Method : C:/CHEM32/1/METHODS/JPT-LCMS.M

Sample Info : 42454\_194-Dr. Martine Darwish H-SSASRLLV-OH

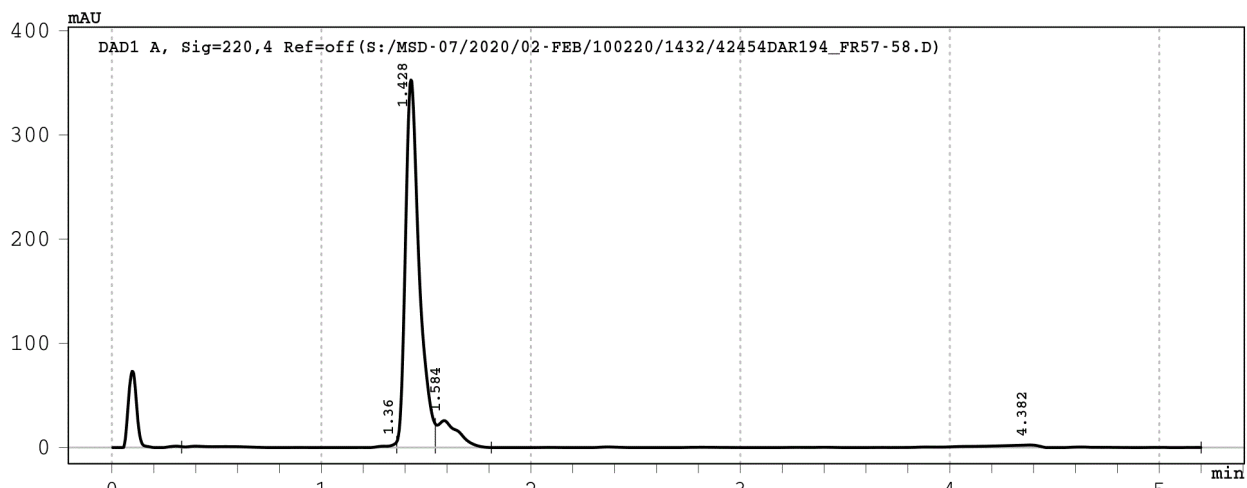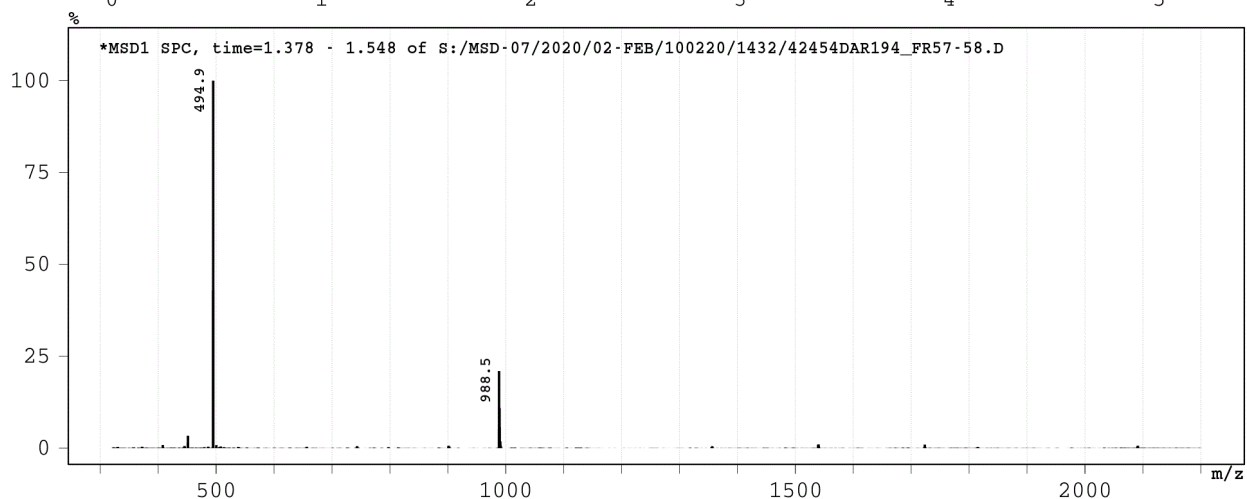

Signal 1: DAD1 A, Sig=220,4 Ref=off

| Peak # | RT [min] | Width [min] | Area   | Area % |
|--------|----------|-------------|--------|--------|
| 1      | 1.360    | 1.03        | 28.6   | 1.5    |
| 2      | 1.428    | 0.18        | 1614.3 | 85.6   |
| 3      | 1.584    | 0.27        | 183.1  | 9.7    |
| 4      | 4.382    | 3.39        | 60.1   | 3.2    |

Data File : S:/MSD-07/2020/02-FEB/110220/1433/42454DAR195\_FR3->



Injection Date : 12-Feb-20, 02:17:27  
Sample Name : 42454DAR195\_FR34-36  
Remarks : Baseline corrected  
Acq. Method : D:/METHODS/5-95-6M.M  
column used : Je\_559  
Analysis Method : C:/CHEM32/1/METHODS/JPT-LCMS.M

Sample Info : 42454\_195-Dr. Martine Darwish H-VQFMSCNL-OH

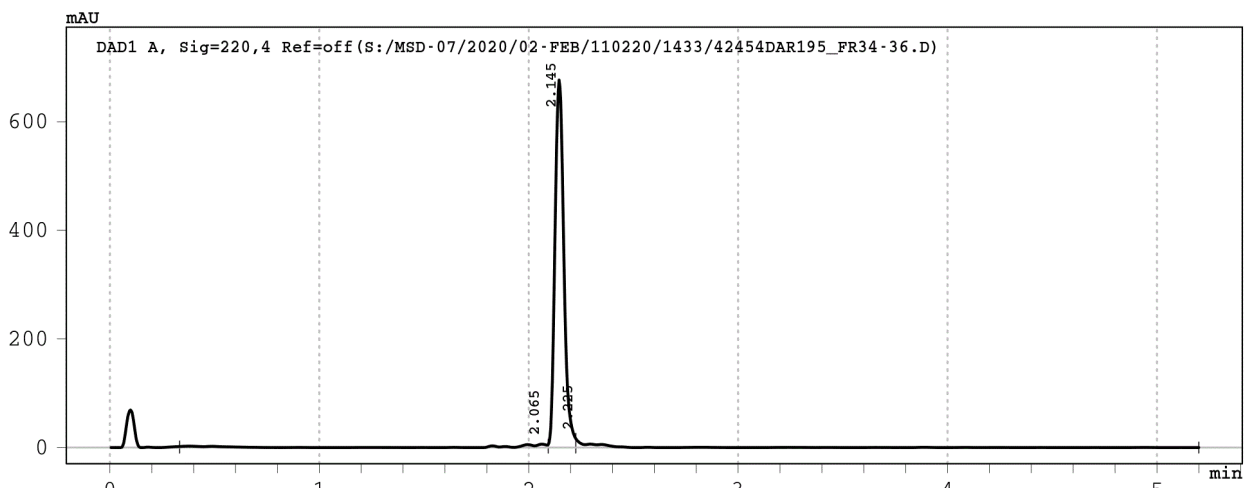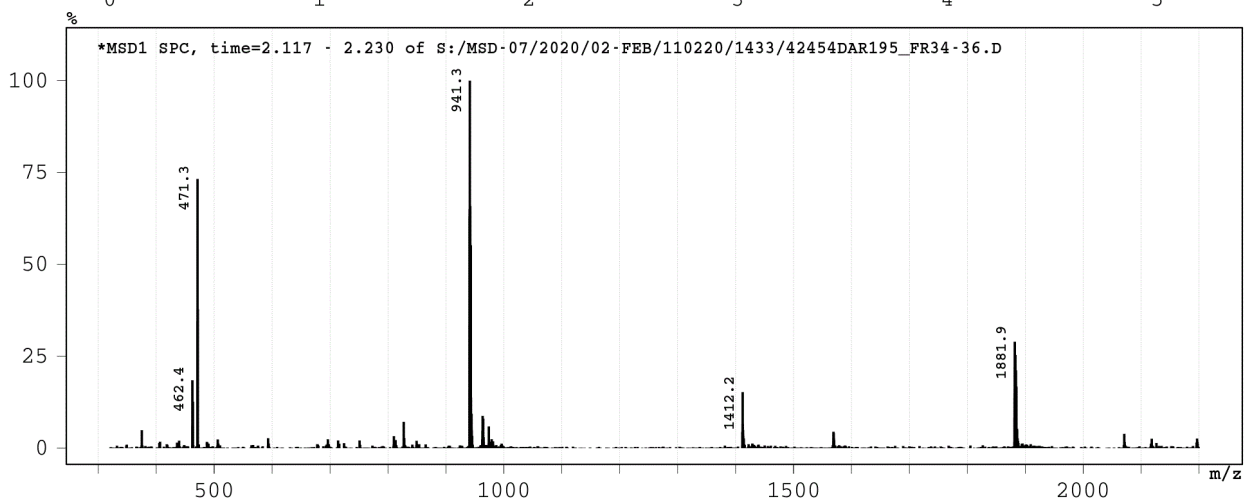

Signal 1: DAD1 A, Sig=220,4 Ref=off

| Peak # | RT [min] | Width [min] | Area   | Area % |
|--------|----------|-------------|--------|--------|
| 1      | 2.065    | 1.76        | 89.4   | 4.1    |
| 2      | 2.145    | 0.13        | 1998.9 | 92.1   |
| 3      | 2.225    | 2.97        | 81.6   | 3.8    |



Data File : S:/MSD-07/2020/02-FEB/060220/1429/42454DAR196\_FR4->



Injection Date : 06-Feb-20, 16:58:21  
Sample Name : 42454DAR196\_FR4-5  
Remarks : Baseline corrected  
Acq. Method : D:/METHODS/5-95-6M.M  
column used : Je\_559  
Analysis Method : C:/CHEM32/1/METHODS/JPT-LCMS.M

Sample Info : 42454\_196-Dr. Martine Darwish H-ASYHNMGLDF-OH

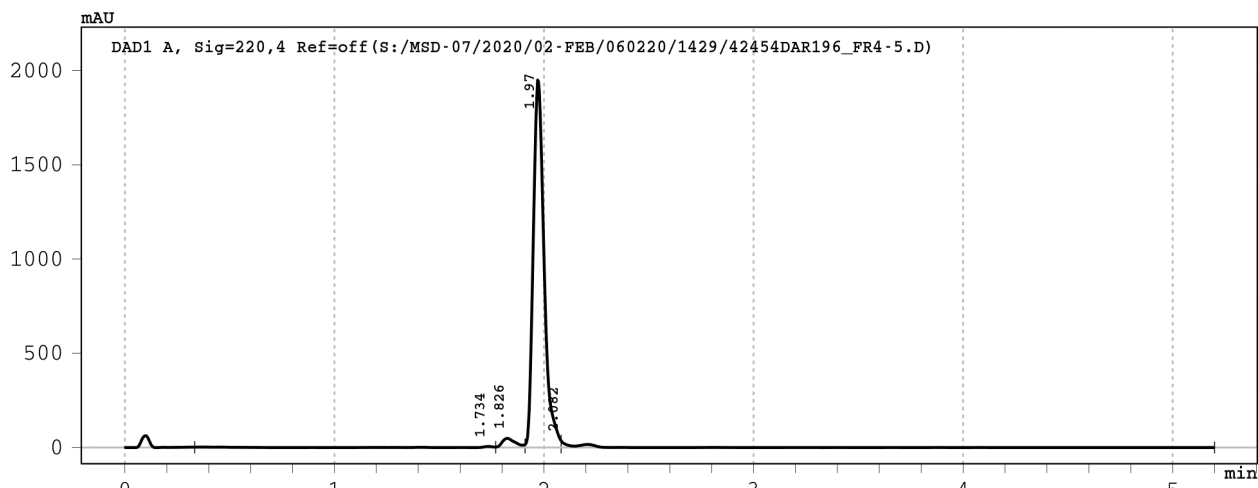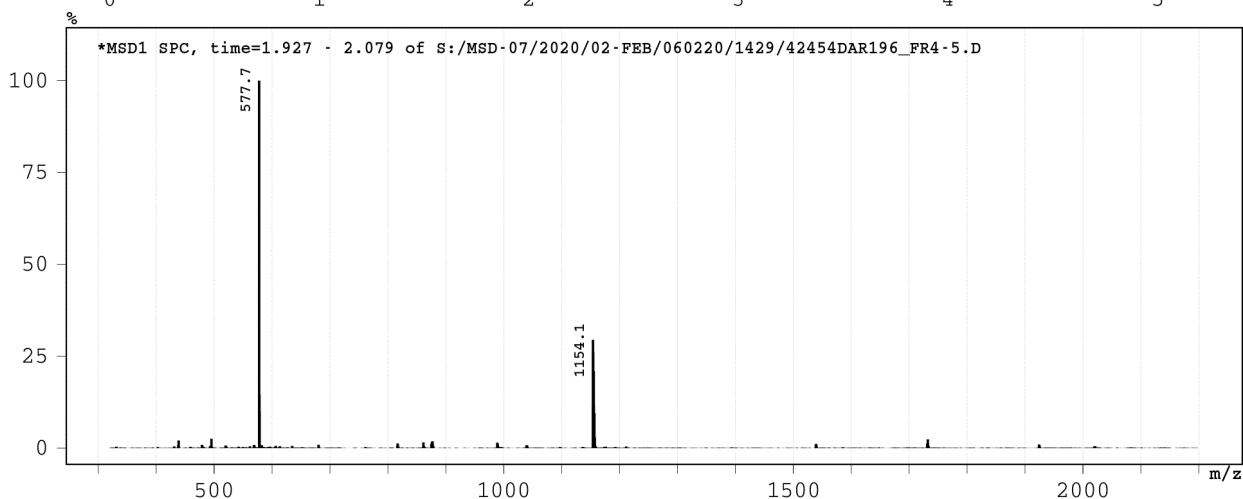

Signal 1: DAD1 A, Sig=220,4 Ref=off

| Peak # | RT [min] | Width [min] | Area   | Area % |
|--------|----------|-------------|--------|--------|
| 1      | 1.734    | 1.44        | 59.1   | 0.8    |
| 2      | 1.826    | 0.14        | 218.7  | 2.9    |
| 3      | 1.970    | 0.17        | 7004.7 | 94.2   |
| 4      | 2.082    | 3.12        | 156.6  | 2.1    |

Data File : S:/MSD-07/2020/02-FEB/110220/1433/42454DAR197\_FR4->  
 Injection Date : 12-Feb-20, 02:25:51  
 Sample Name : 42454DAR197\_FR42-44  
 Remarks : Baseline corrected  
 Acq. Method : D:/METHODS/5-95-6M.M  
 column used : Je\_559  
 Analysis Method : C:/CHEM32/1/METHODS/JPT-LCMS.M



Sample Info : 42454\_197-Dr. Martine Darwish H-SSFVPVGL-OH

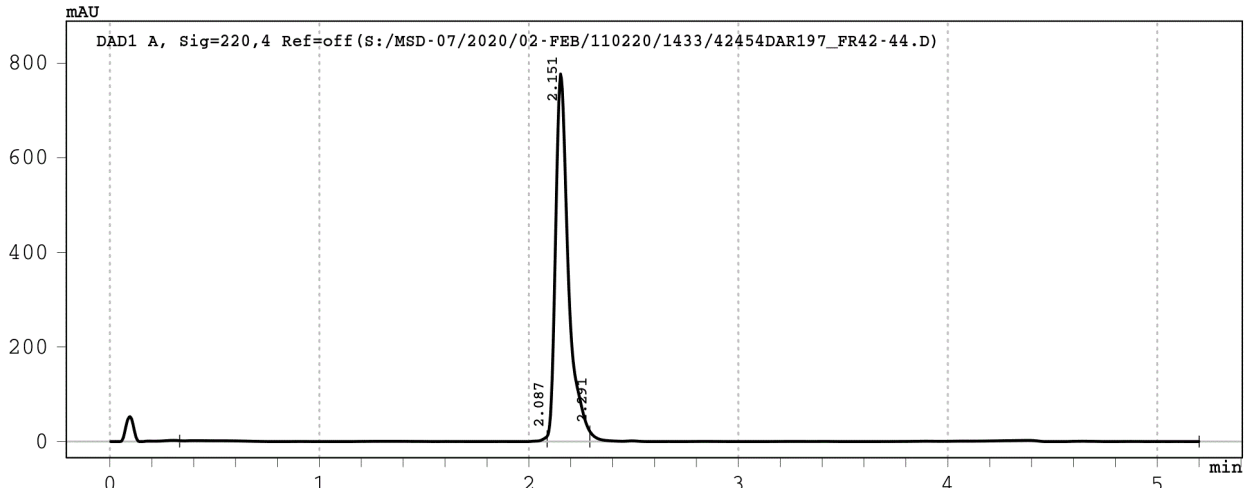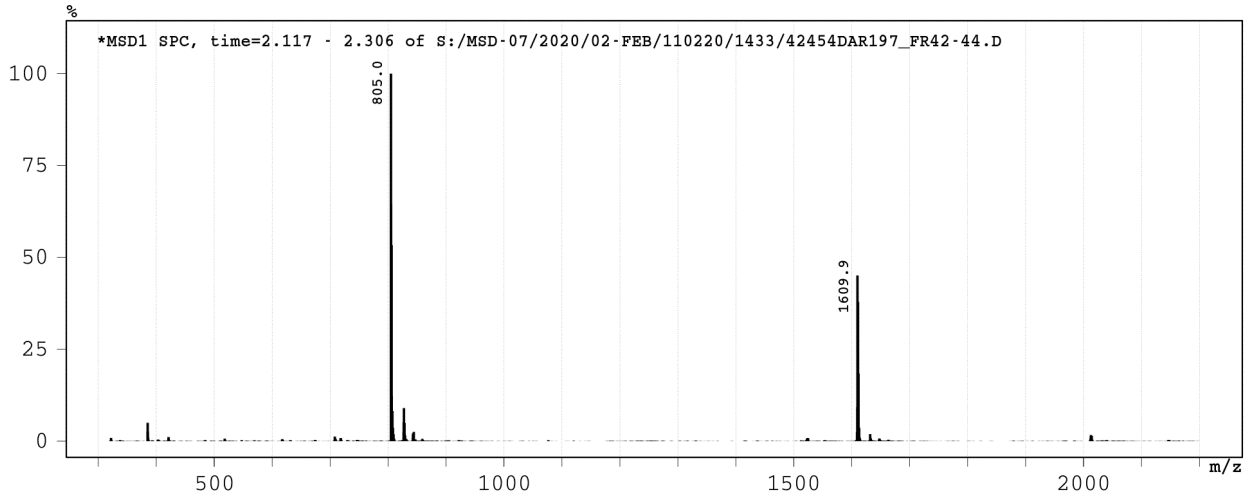

Signal 1: DAD1 A, Sig=220,4 Ref=off

| Peak # | RT [min] | Width [min] | Area   | Area % |
|--------|----------|-------------|--------|--------|
| 1      | 2.087    | 1.75        | 55.9   | 1.6    |
| 2      | 2.151    | 0.20        | 3317.8 | 95.4   |
| 3      | 2.291    | 2.91        | 104.2  | 3.0    |

Data File : S:/MSD-07/2020/02-FEB/100220/1432/42454DAR198\_FR6 ->  
 Injection Date : 10-Feb-20, 18:59:06  
 Sample Name : 42454DAR198\_FR67  
 Remarks : Baseline corrected  
 Acq. Method : D:/METHODS/5-95-6M.M  
 column used : Je\_559  
 Analysis Method : C:/CHEM32/1/METHODS/JPT-LCMS.M



Sample Info : 42454\_198-Dr. Martine Darwish H-VLYLLDTSL-OH

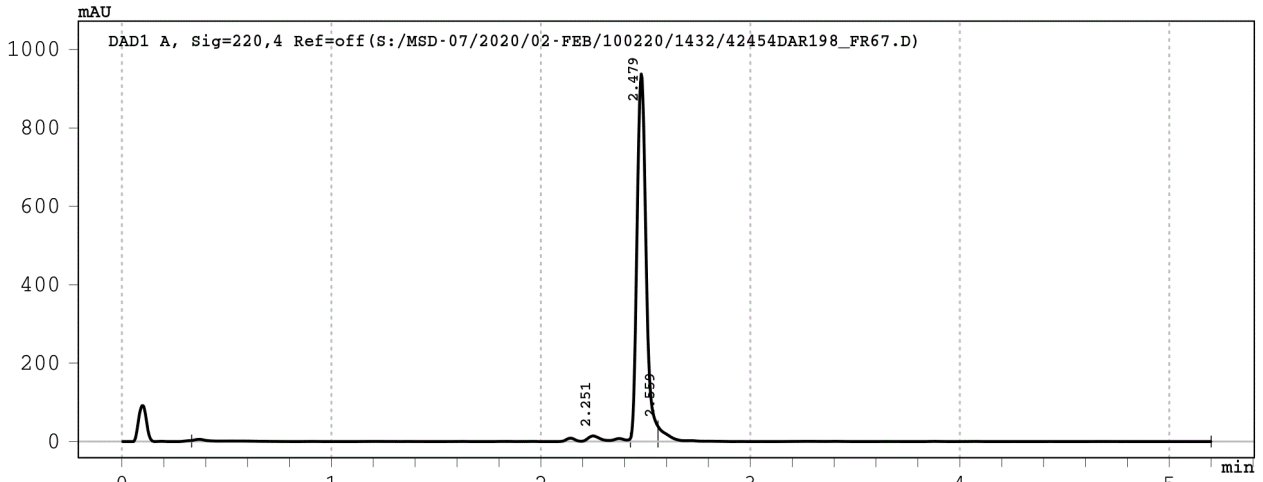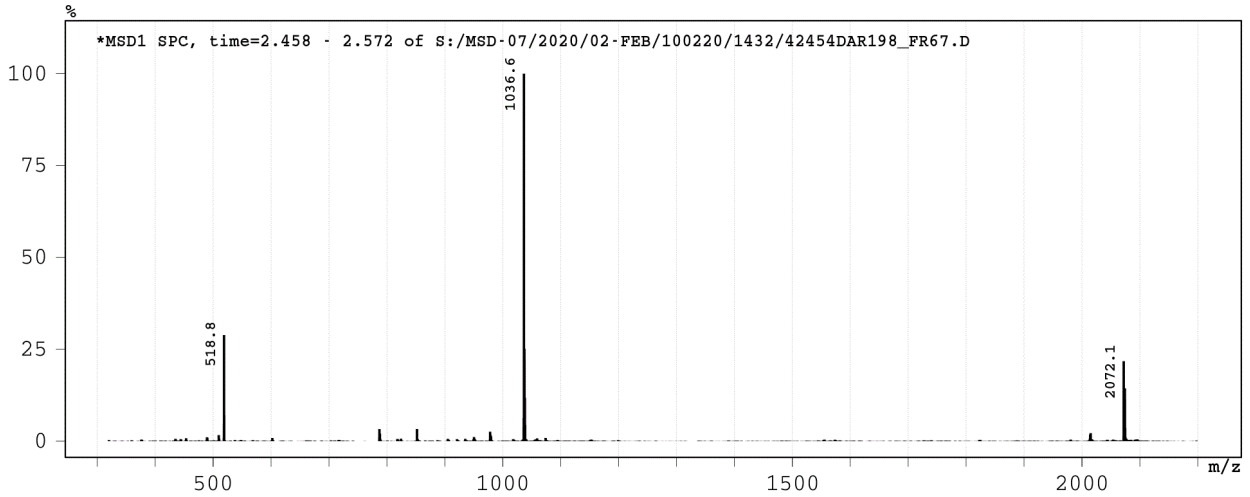

Signal 1: DAD1 A, Sig=220,4 Ref=off

| Peak # | RT [min] | Width [min] | Area   | Area % |
|--------|----------|-------------|--------|--------|
| 1      | 2.251    | 2.09        | 161.5  | 5.2    |
| 2      | 2.479    | 0.13        | 2821.4 | 90.7   |
| 3      | 2.559    | 2.64        | 129.4  | 4.2    |

Data File : S:/MSD-07/2020/02-FEB/100220/1432/42454DAR199\_FR7->  
 Injection Date : 10-Feb-20, 19:07:30  
 Sample Name : 42454DAR199\_FR79-80  
 Remarks : Baseline corrected  
 Acq. Method : D:/METHODS/5-95-6M.M  
 column used : Je\_559  
 Analysis Method : C:/CHEM32/1/METHODS/JPT-LCMS.M



Sample Info : 42454\_199-Dr. Martine Darwish H-IGAGFFSDV-OH

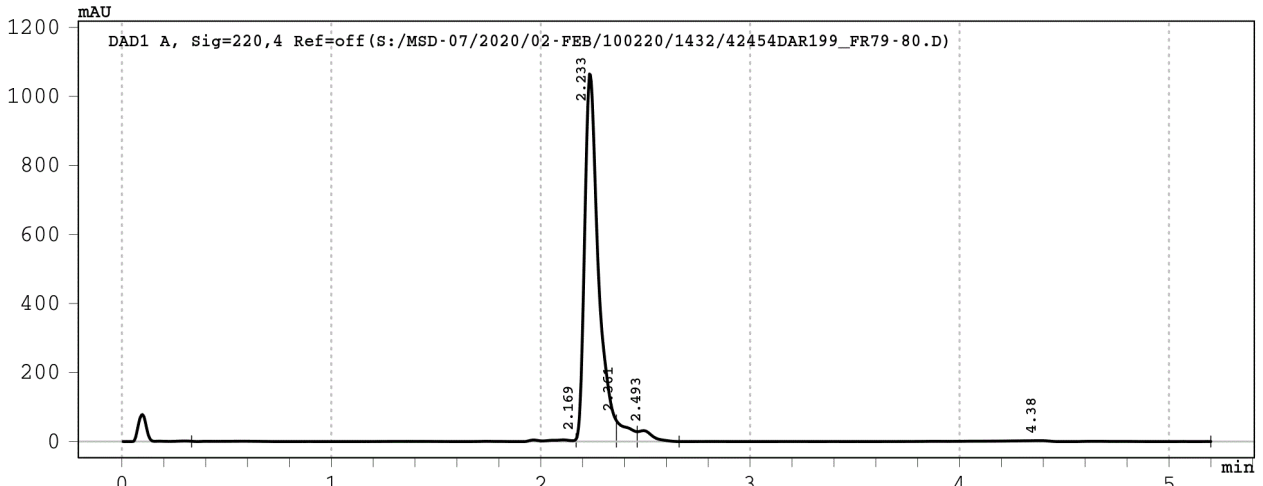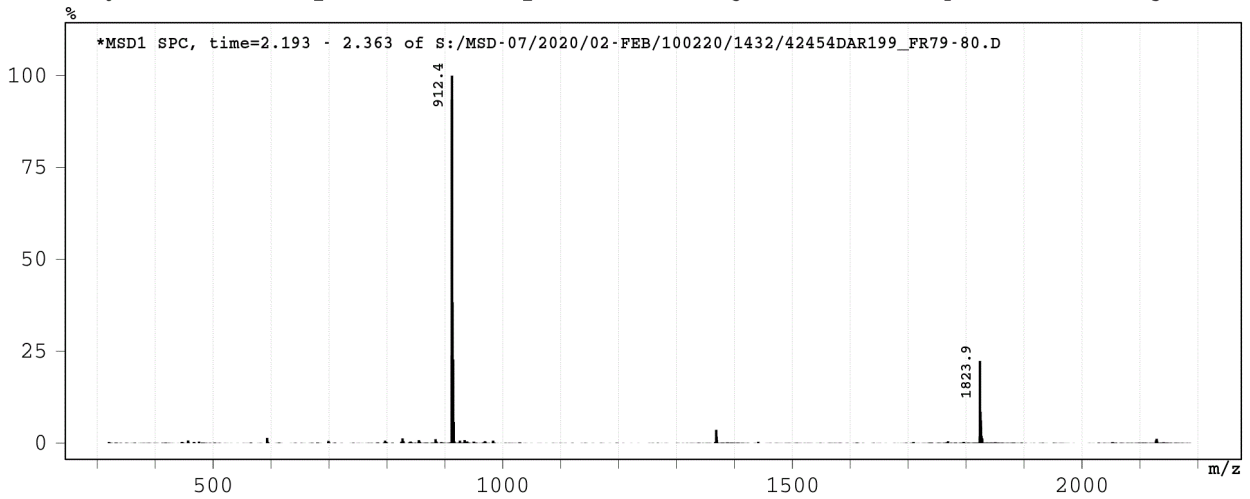

Signal 1: DAD1 A, Sig=220,4 Ref=off

| Peak # | RT [min] | Width [min] | Area   | Area % |
|--------|----------|-------------|--------|--------|
| 1      | 2.169    | 1.84        | 70.2   | 1.3    |
| 2      | 2.233    | 0.19        | 4849.7 | 90.2   |
| 3      | 2.361    | 0.10        | 244.9  | 4.6    |
| 4      | 2.493    | 0.20        | 152.5  | 2.8    |
| 5      | 4.380    | 2.54        | 60.2   | 1.1    |

Data File : S:/MSD-07/2020/02-FEB/140220/1435/42454DAR200\_FR1->



Injection Date : 15-Feb-20, 01:01:27  
Sample Name : 42454DAR200\_FR19-21  
Remarks : Baseline corrected  
Acq. Method : D:/METHODS/5-95-6M.M  
column used : Je\_559  
Analysis Method : C:/CHEM32/1/METHODS/JPT-LCMS.M

Sample Info : 42454\_200-Dr. Martine Darwish H-FTPSHPPL-OH

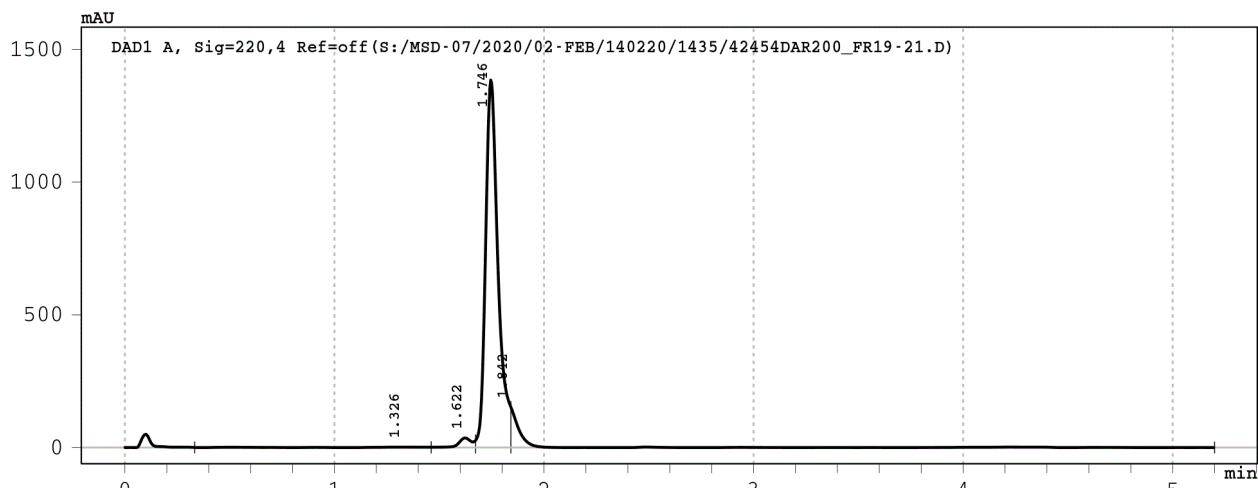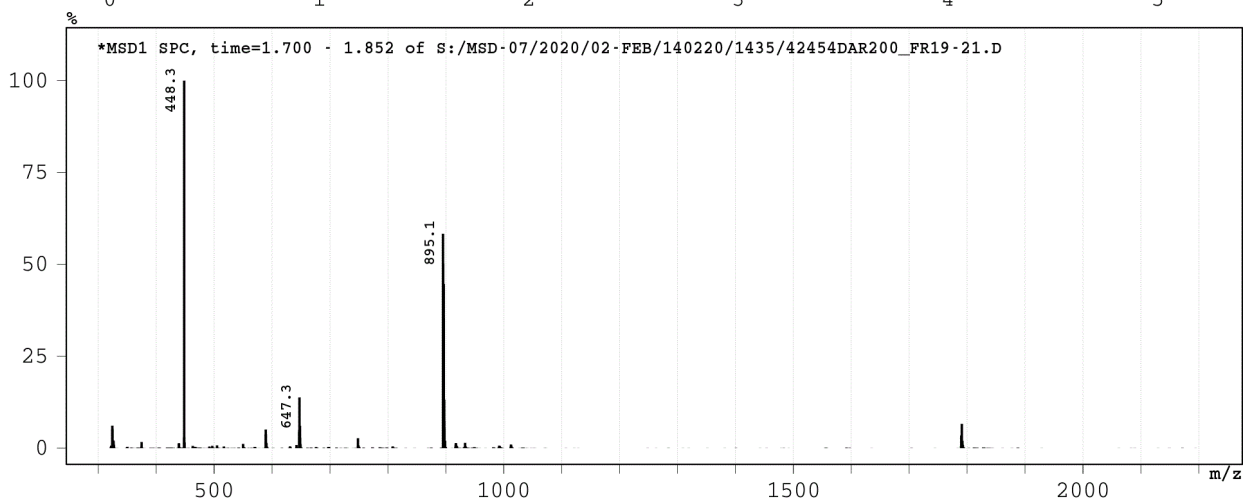

Signal 1: DAD1 A, Sig=220,4 Ref=off

| Peak # | RT [min] | Width [min] | Area   | Area % |
|--------|----------|-------------|--------|--------|
| 1      | 1.326    | 1.13        | 42.9   | 0.7    |
| 2      | 1.622    | 0.21        | 159.8  | 2.5    |
| 3      | 1.746    | 0.17        | 5733.2 | 89.7   |
| 4      | 1.842    | 3.36        | 455.8  | 7.1    |

Data File : S:/MSD-07/2020/02-FEB/060220/1429/42454DAR201\_FR1->



Injection Date : 06-Feb-20, 17:06:43  
Sample Name : 42454DAR201\_FR12-13  
Remarks : Baseline corrected  
Acq. Method : D:/METHODS/5-95-6M.M  
column used : Je\_559  
Analysis Method : C:/CHEM32/1/METHODS/JPT-LCMS.M

Sample Info : 42454\_201-Dr. Martine Darwish H-VAMCRLGIF-OH

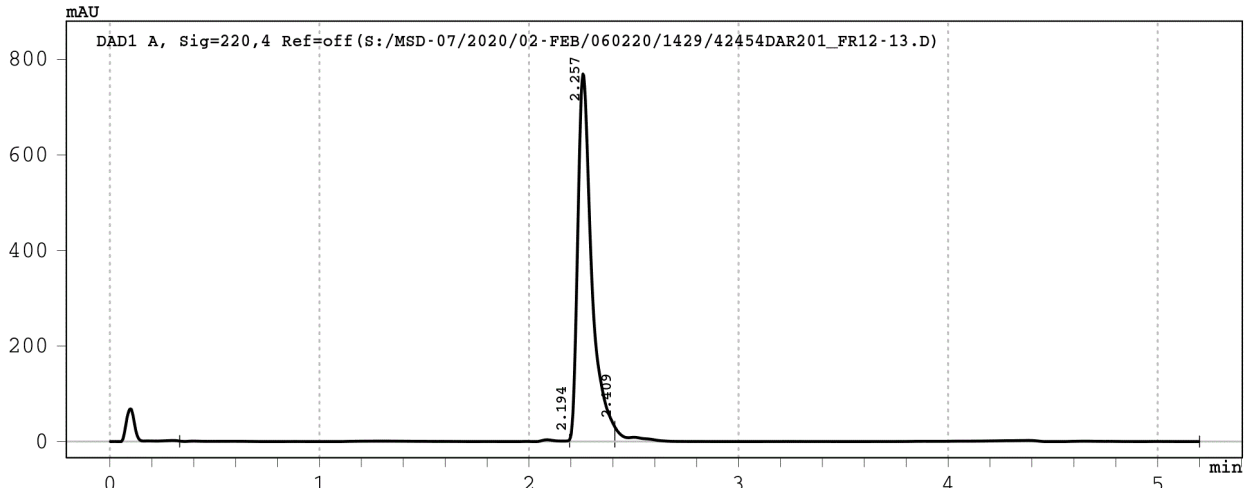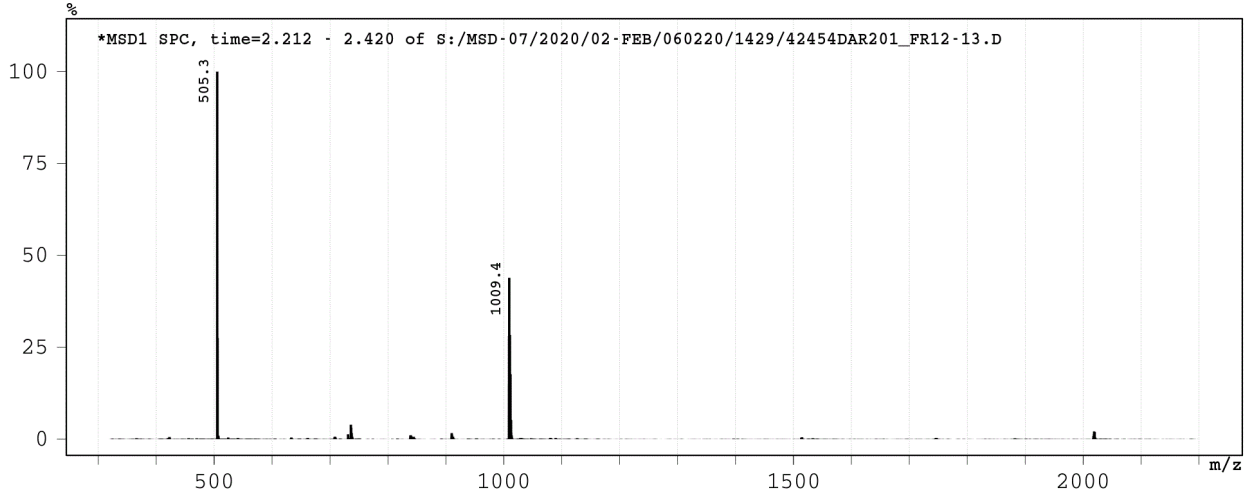

Signal 1: DAD1 A, Sig=220,4 Ref=off

| Peak # | RT [min] | Width [min] | Area   | Area % |
|--------|----------|-------------|--------|--------|
| 1      | 2.194    | 1.86        | 48.3   | 1.3    |
| 2      | 2.257    | 0.22        | 3582.2 | 94.2   |
| 3      | 2.409    | 2.79        | 171.7  | 4.5    |

Data File : S:/MSD-07/2020/02-FEB/060220/1429/42454DAR202\_FR2->  
 Injection Date : 06-Feb-20, 17:15:06  
 Sample Name : 42454DAR202\_FR23-24  
 Remarks : Baseline corrected  
 Acq. Method : D:/METHODS/5-95-6M.M  
 column used : Je\_559  
 Analysis Method : C:/CHEM32/1/METHODS/JPT-LCMS.M



Sample Info : 42454\_202-Dr. Martine Darwish H-IMTQHLEPI-OH

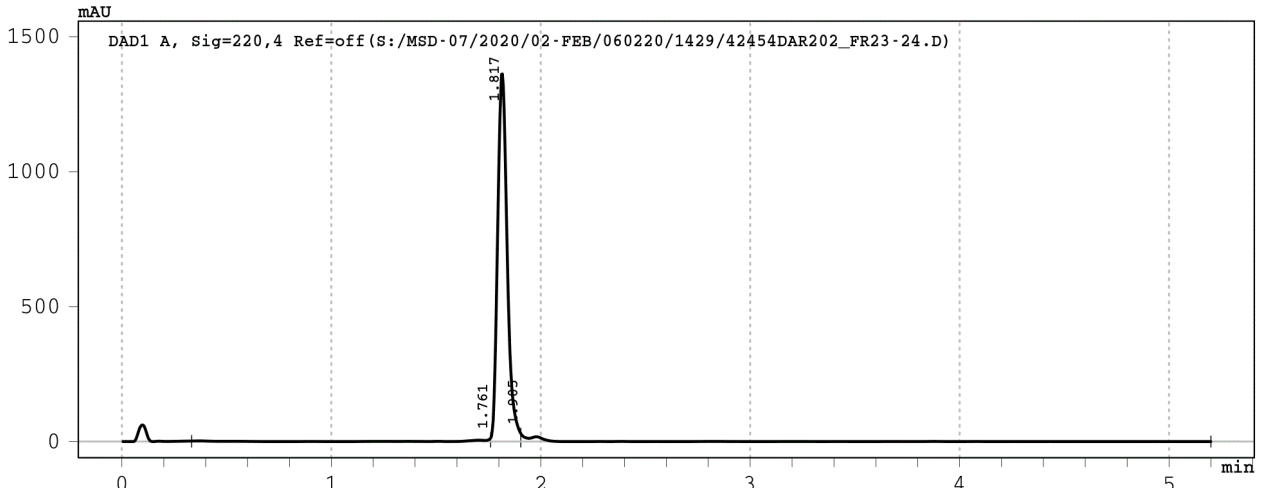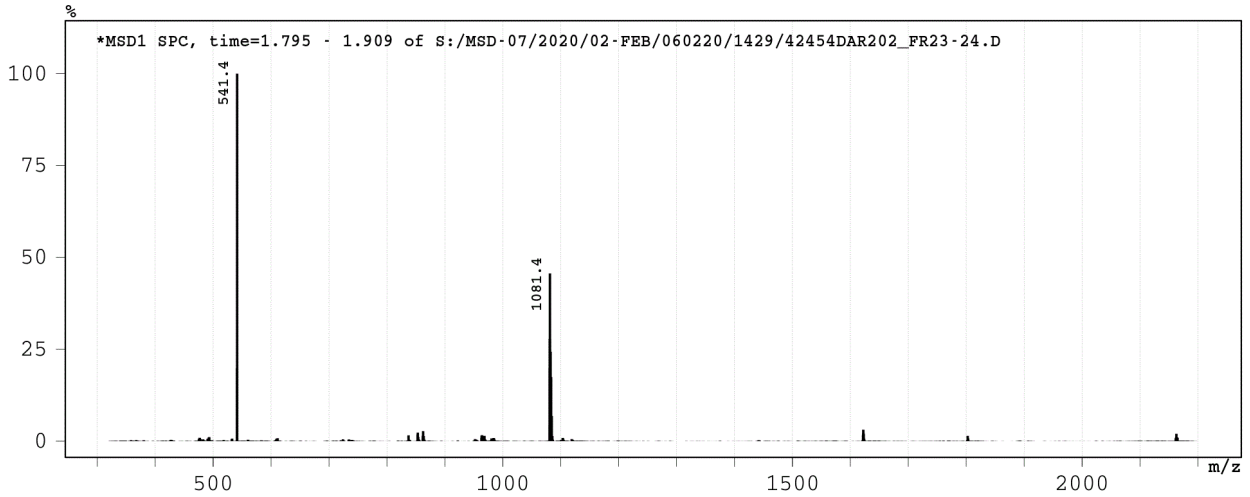

Signal 1: DAD1 A, Sig=220,4 Ref=off

| Peak # | RT [min] | Width [min] | Area   | Area % |
|--------|----------|-------------|--------|--------|
| 1      | 1.761    | 1.43        | 70.4   | 1.5    |
| 2      | 1.817    | 0.14        | 4351.4 | 95.7   |
| 3      | 1.905    | 3.30        | 125.7  | 2.8    |

Data File : S:/MSD-07/2020/02-FEB/100220/1432/42454DAR203\_FR7->  
 Injection Date : 10-Feb-20, 19:15:53  
 Sample Name : 42454DAR203\_FR7-8  
 Remarks : Baseline corrected  
 Acq. Method : D:/METHODS/5-95-6M.M  
 column used : Je\_559  
 Analysis Method : C:/CHEM32/1/METHODS/JPT-LCMS.M



Sample Info : 42454\_203-Dr. Martine Darwish H-SAWVPPGGL-OH

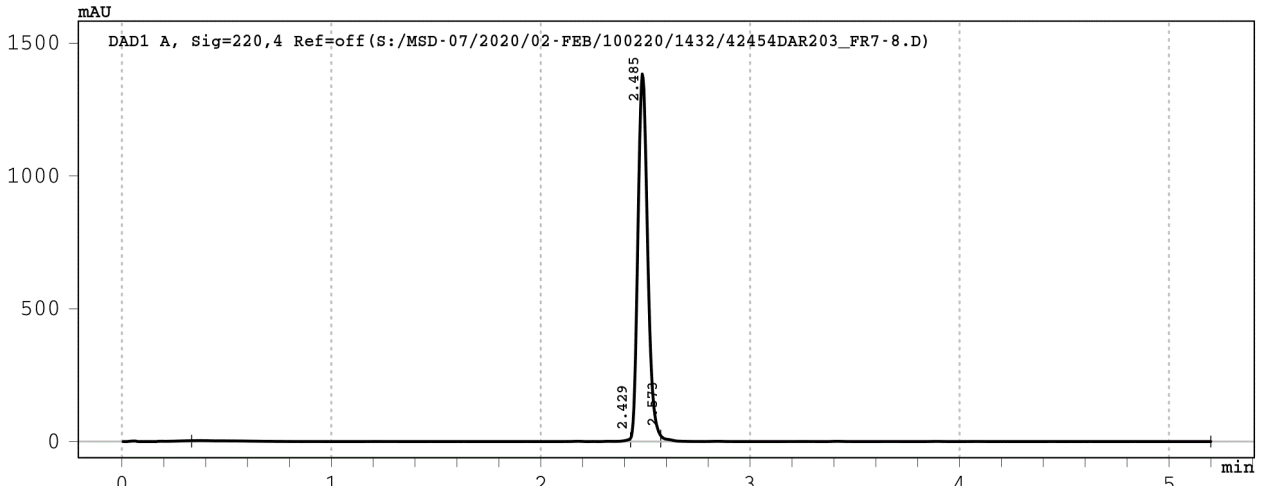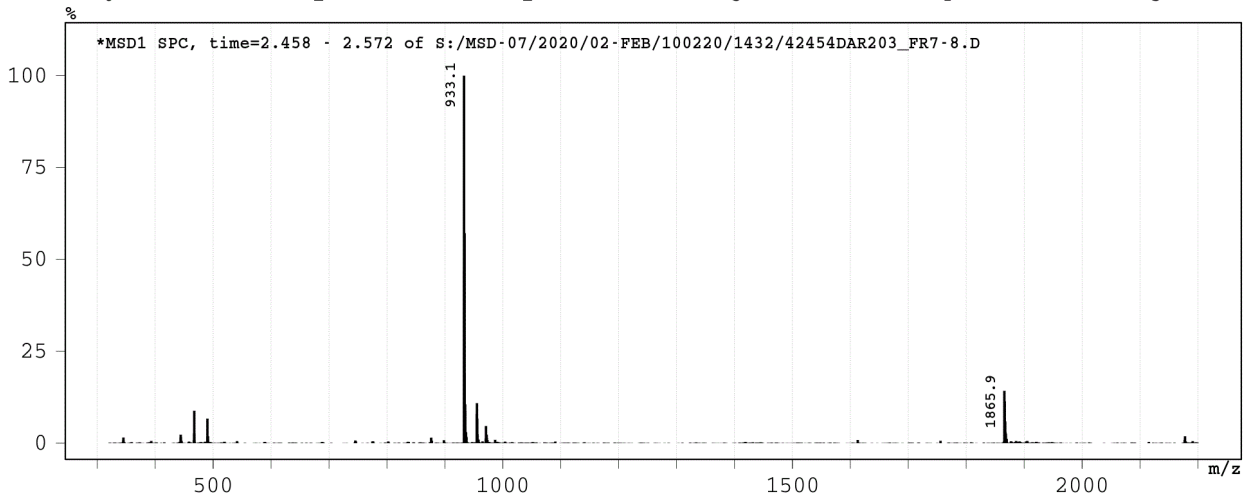

Signal 1: DAD1 A, Sig=220,4 Ref=off

| Peak # | RT [min] | Width [min] | Area   | Area % |
|--------|----------|-------------|--------|--------|
| 1      | 2.429    | 2.10        | 77.5   | 1.7    |
| 2      | 2.485    | 0.14        | 4484.8 | 97.1   |
| 3      | 2.573    | 2.63        | 55.8   | 1.2    |



Data File : S:/MSD-07/2020/02-FEB/140220/1435/42454DAR204\_FR2->



Injection Date : 15-Feb-20, 01:10:01  
Sample Name : 42454DAR204\_FR25-28  
Remarks : Baseline corrected  
Acq. Method : D:/METHODS/5-95-6M.M  
column used : Je\_559  
Analysis Method : C:/CHEM32/1/METHODS/JPT-LCMS.M

Sample Info : 42454\_204-Dr. Martine Darwish H-ILLRLKFL-OH

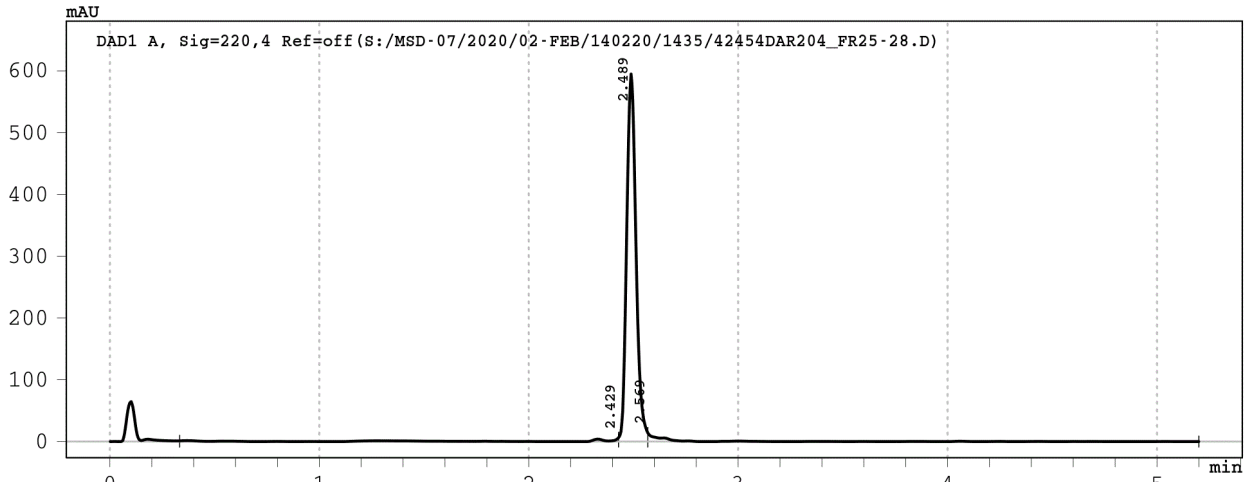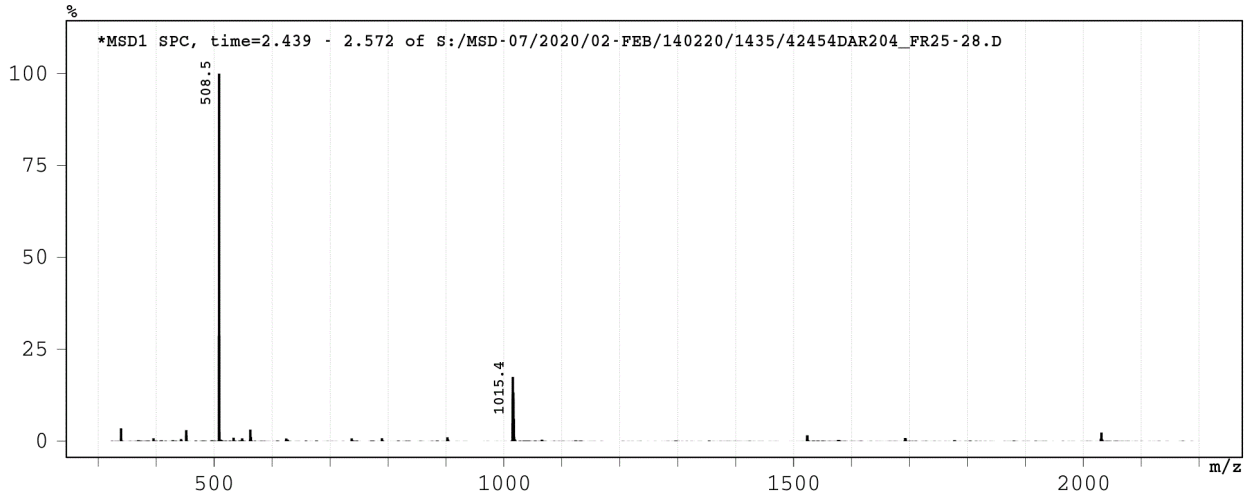

Signal 1: DAD1 A, Sig=220,4 Ref=off

| Peak # | RT [min] | Width [min] | Area   | Area % |
|--------|----------|-------------|--------|--------|
| 1      | 2.429    | 2.10        | 63.9   | 3.2    |
| 2      | 2.489    | 0.14        | 1844.3 | 93.5   |
| 3      | 2.569    | 2.63        | 63.6   | 3.2    |

Data File : S:/MSD-07/2020/02-FEB/100220/1432/42454DAR205\_FR2 ->  
 Injection Date : 10-Feb-20, 19:24:17  
 Sample Name : 42454DAR205\_FR22  
 Remarks : Baseline corrected  
 Acq. Method : D:/METHODS/5-95-6M.M  
 column used : Je\_559  
 Analysis Method : C:/CHEM32/1/METHODS/JPT-LCMS.M



Sample Info : 42454\_205-Dr. Martine Darwish H-VVFNHFYNI-OH

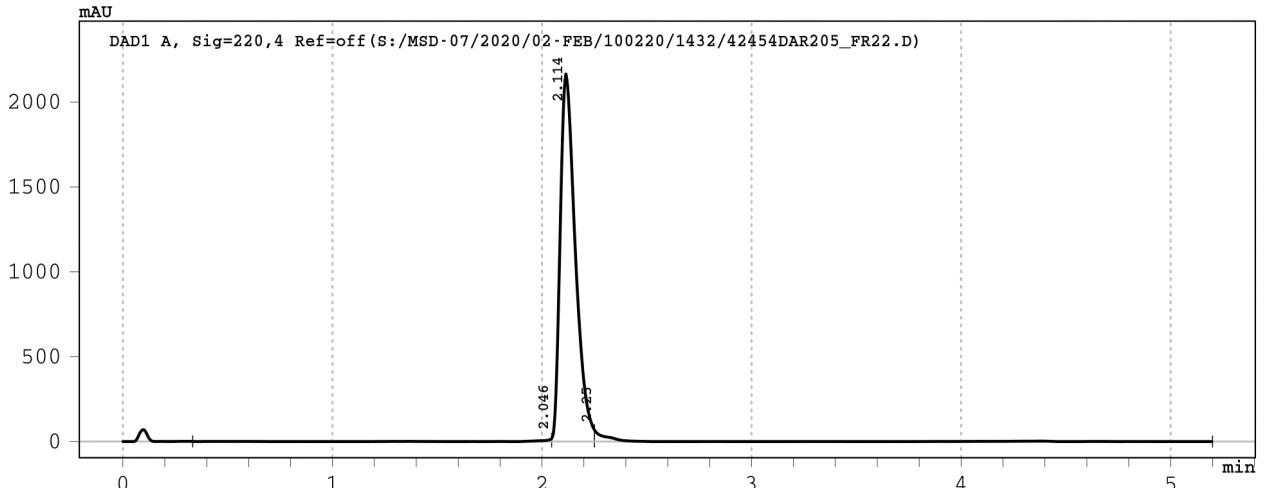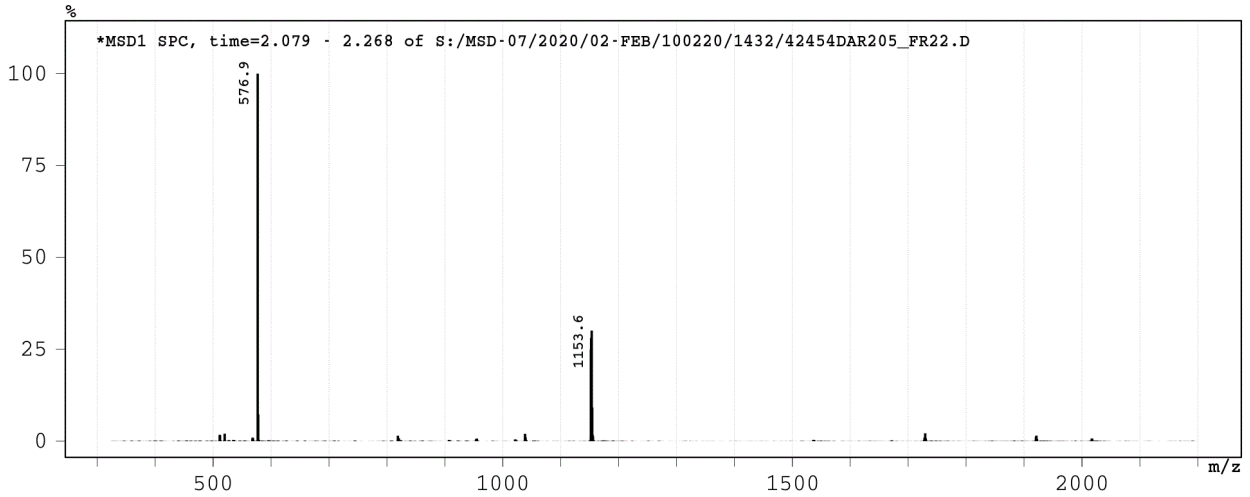

Signal 1: DAD1 A, Sig=220,4 Ref=off

| Peak # | RT [min] | Width [min] | Area    | Area % |
|--------|----------|-------------|---------|--------|
| 1      | 2.046    | 1.71        | 64.2    | 0.6    |
| 2      | 2.114    | 0.20        | 10876.3 | 96.8   |
| 3      | 2.250    | 2.95        | 291.9   | 2.6    |

Data File : S:/MSD-07/2020/02-FEB/100220/1432/42454DAR206\_FR3->



Injection Date : 10-Feb-20, 19:32:40  
Sample Name : 42454DAR206\_FR34-35  
Remarks : Baseline corrected  
Acq. Method : D:/METHODS/5-95-6M.M  
column used : Je\_559  
Analysis Method : C:/CHEM32/1/METHODS/JPT-LCMS.M

Sample Info : 42454\_206-Dr. Martine Darwish H-SVAGFNPAL-OH

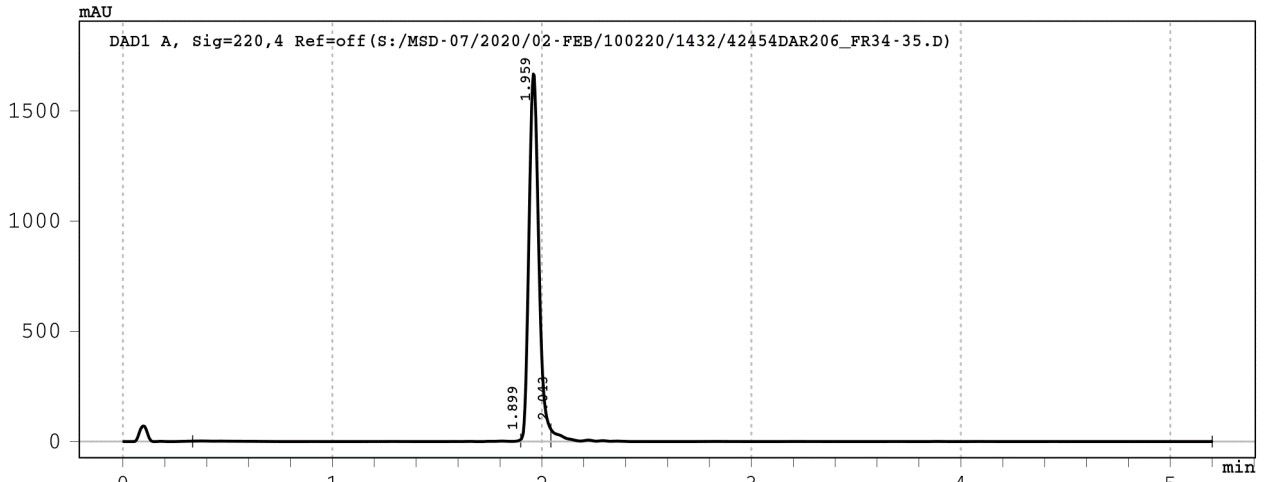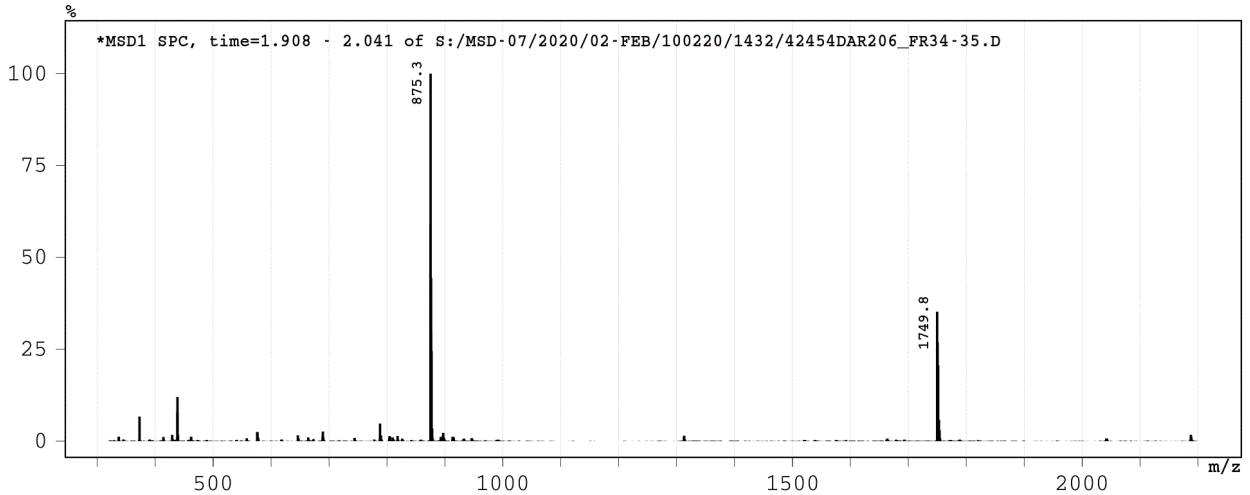

Signal 1: DAD1 A, Sig=220,4 Ref=off

| Peak # | RT [min] | Width [min] | Area   | Area % |
|--------|----------|-------------|--------|--------|
| 1      | 1.899    | 1.57        | 55.7   | 1.0    |
| 2      | 1.959    | 0.14        | 5421.6 | 95.3   |
| 3      | 2.043    | 3.16        | 212.9  | 3.7    |

Data File : S:/MSD-07/2020/02-FEB/060220/1429/42454DAR207\_FR3->  
 Injection Date : 06-Feb-20, 17:23:29  
 Sample Name : 42454DAR207\_FR34-36  
 Remarks : Baseline corrected  
 Acq. Method : D:/METHODS/5-95-6M.M  
 column used : Je\_559  
 Analysis Method : C:/CHEM32/1/METHODS/JPT-LCMS.M



Sample Info : 42454\_207-Dr. Martine Darwish H-MGVMNRRPI-OH

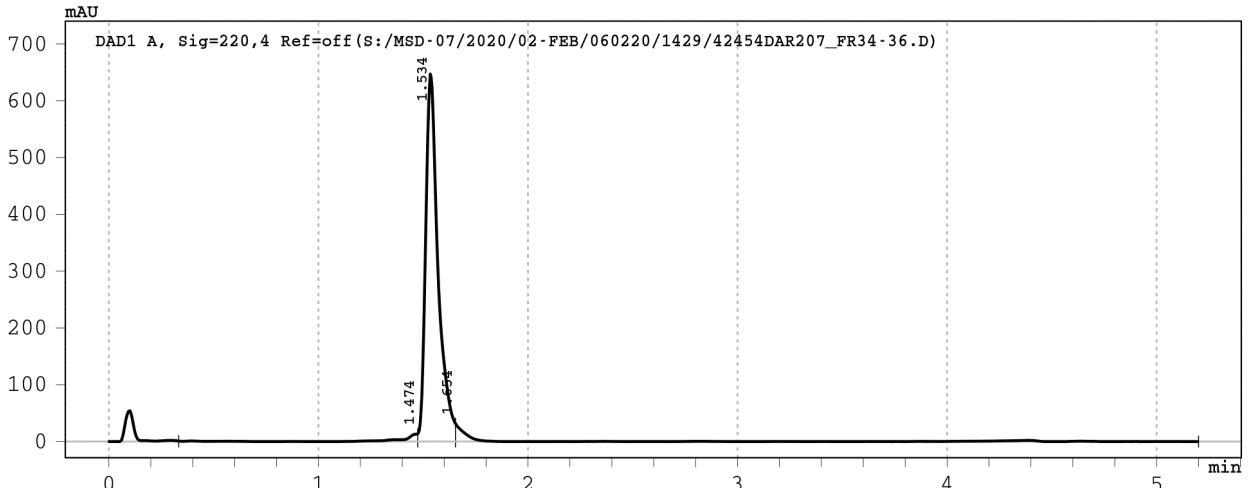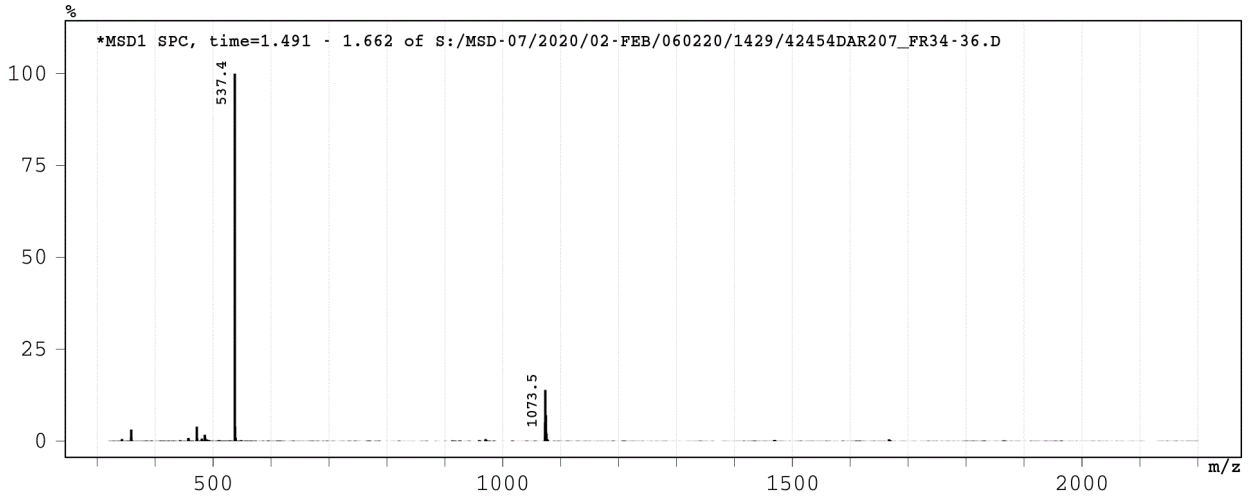

Signal 1: DAD1 A, Sig=220,4 Ref=off

| Peak # | RT [min] | Width [min] | Area   | Area % |
|--------|----------|-------------|--------|--------|
| 1      | 1.474    | 1.14        | 72.4   | 2.5    |
| 2      | 1.534    | 0.18        | 2670.6 | 92.8   |
| 3      | 1.654    | 3.55        | 135.4  | 4.7    |

Data File : S:/MSD-07/2020/02-FEB/060220/1429/42454DAR208\_FR3->



Injection Date : 06-Feb-20, 17:31:51  
Sample Name : 42454DAR208\_FR38-39  
Remarks : Baseline corrected  
Acq. Method : D:/METHODS/5-95-6M.M  
column used : Je\_559  
Analysis Method : C:/CHEM32/1/METHODS/JPT-LCMS.M

Sample Info : 42454\_208-Dr. Martine Darwish H-MSLGTTTTL-OH

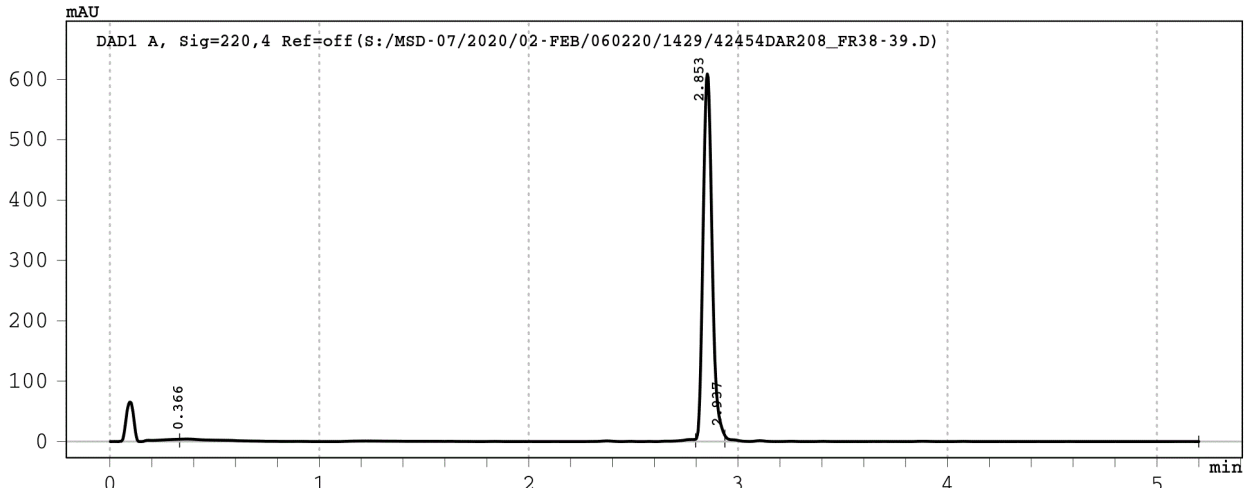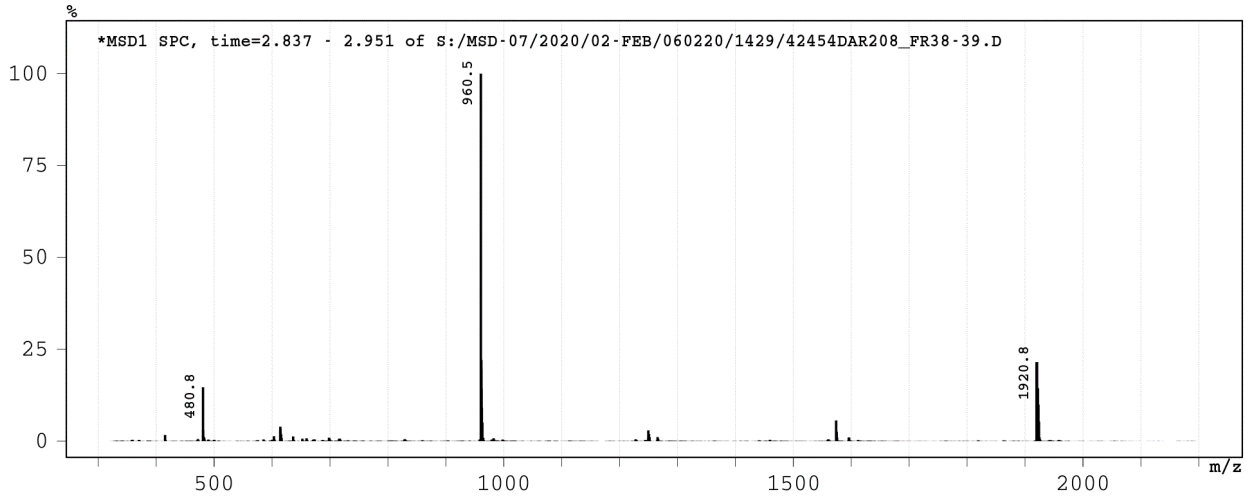

Signal 1: DAD1 A, Sig=220,4 Ref=off

| Peak # | RT [min] | Width [min] | Area   | Area % |
|--------|----------|-------------|--------|--------|
| 1      | 0.366    | 2.46        | 95.6   | 4.9    |
| 2      | 2.853    | 0.14        | 1836.9 | 93.7   |
| 3      | 2.937    | 2.26        | 26.8   | 1.4    |

Data File : S:/MSD-07/2020/02-FEB/100220/1432/42454DAR209\_FR4->  
 Injection Date : 10-Feb-20, 19:41:05  
 Sample Name : 42454DAR209\_FR43-44  
 Remarks : Baseline corrected  
 Acq. Method : D:/METHODS/5-95-6M.M  
 column used : Je\_559  
 Analysis Method : C:/CHEM32/1/METHODS/JPT-LCMS.M



Sample Info : 42454\_209-Dr. Martine Darwish H-AQARNSLEL-OH

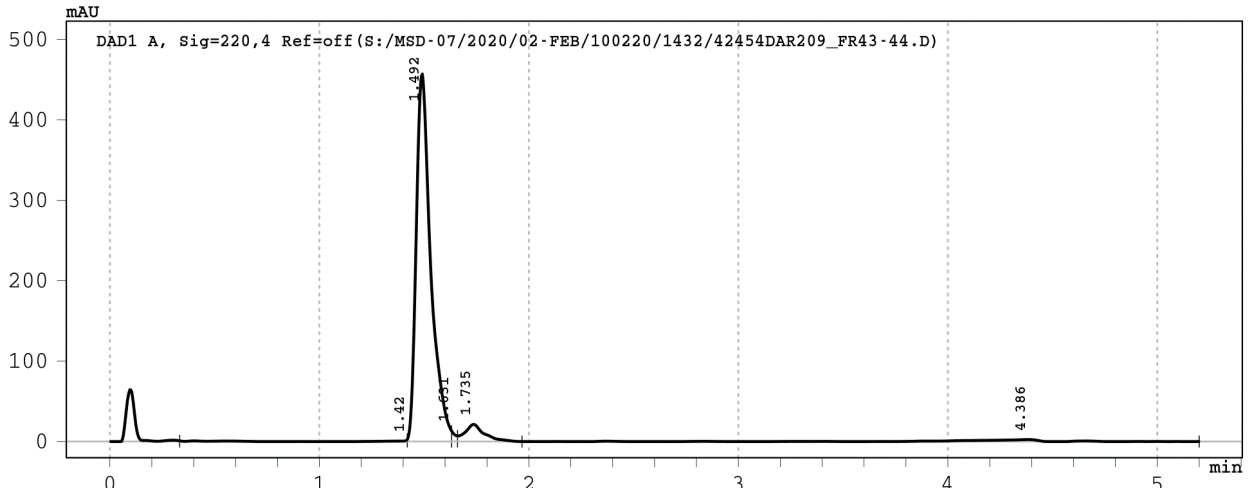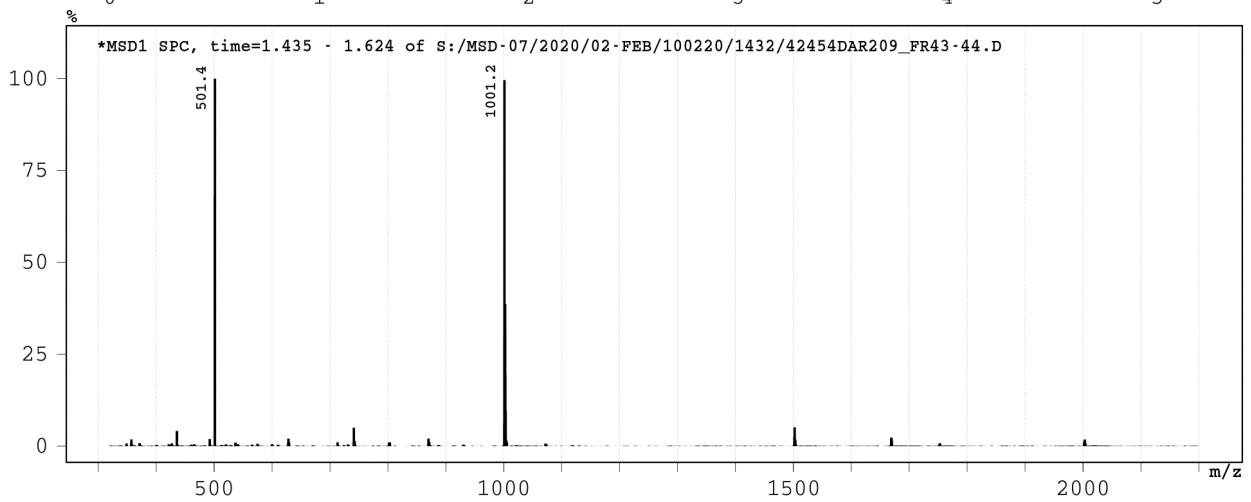

Signal 1: DAD1 A, Sig=220,4 Ref=off

| Peak # | RT [min] | Width [min] | Area   | Area % |
|--------|----------|-------------|--------|--------|
| 1      | 1.420    | 1.09        | 16.2   | 0.7    |
| 2      | 1.492    | 0.21        | 2210.7 | 90.5   |
| 3      | 1.631    | 0.03        | 15.2   | 0.6    |
| 4      | 1.735    | 0.31        | 138.9  | 5.7    |
| 5      | 4.386    | 3.23        | 62.9   | 2.6    |

Data File : S:/MSD-07/2020/02-FEB/140220/1435/42454DAR210\_FR3 ->



Injection Date : 15-Feb-20, 01:18:29  
Sample Name : 42454DAR210\_FR33  
Remarks : Baseline corrected  
Acq. Method : D:/METHODS/5-95-6M.M  
column used : Je\_559  
Analysis Method : C:/CHEM32/1/METHODS/JPT-LCMS.M

Sample Info : 42454\_210-Dr. Martine Darwish H-FSYIVELL-OH

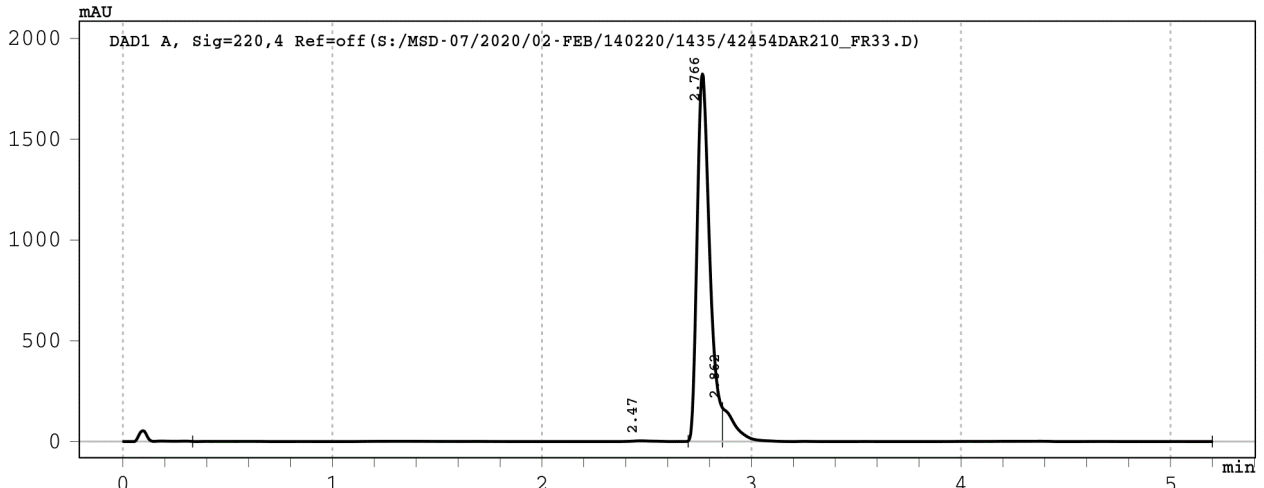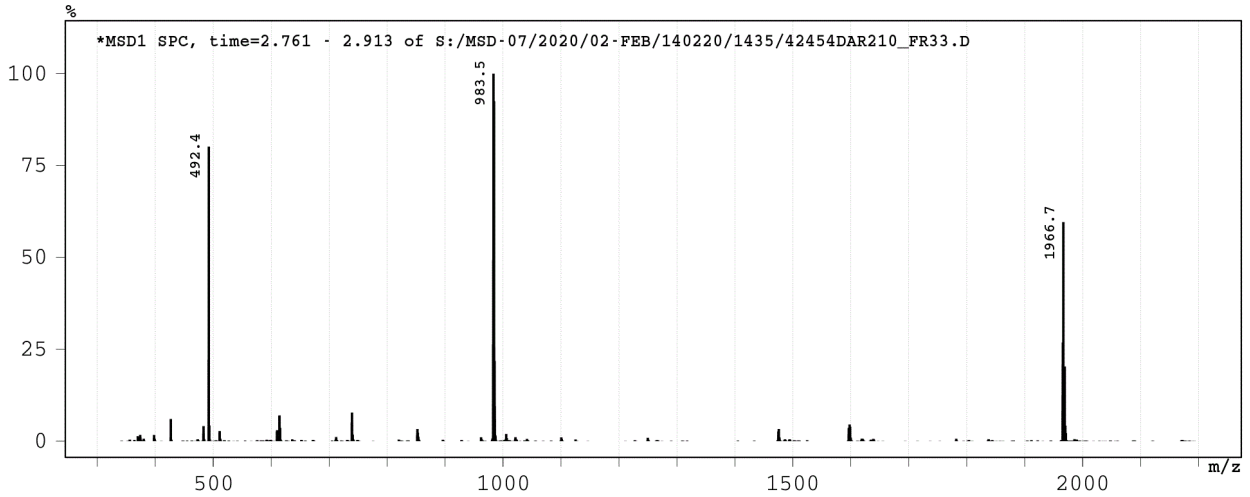

Signal 1: DAD1 A, Sig=220,4 Ref=off

| Peak # | RT [min] | Width [min] | Area   | Area % |
|--------|----------|-------------|--------|--------|
| 1      | 2.470    | 2.36        | 71.0   | 0.8    |
| 2      | 2.766    | 0.16        | 7638.0 | 90.5   |
| 3      | 2.862    | 2.34        | 734.0  | 8.7    |

Data File : S:/MSD-07/2020/02-FEB/100220/1432/42454DAR211\_FR5->  
 Injection Date : 10-Feb-20, 19:49:28  
 Sample Name : 42454DAR211\_FR52-53  
 Remarks : Baseline corrected  
 Acq. Method : D:/METHODS/5-95-6M.M  
 column used : Je\_559  
 Analysis Method : C:/CHEM32/1/METHODS/JPT-LCMS.M



Sample Info : 42454\_211-Dr. Martine Darwish H-VAALREFLV-OH

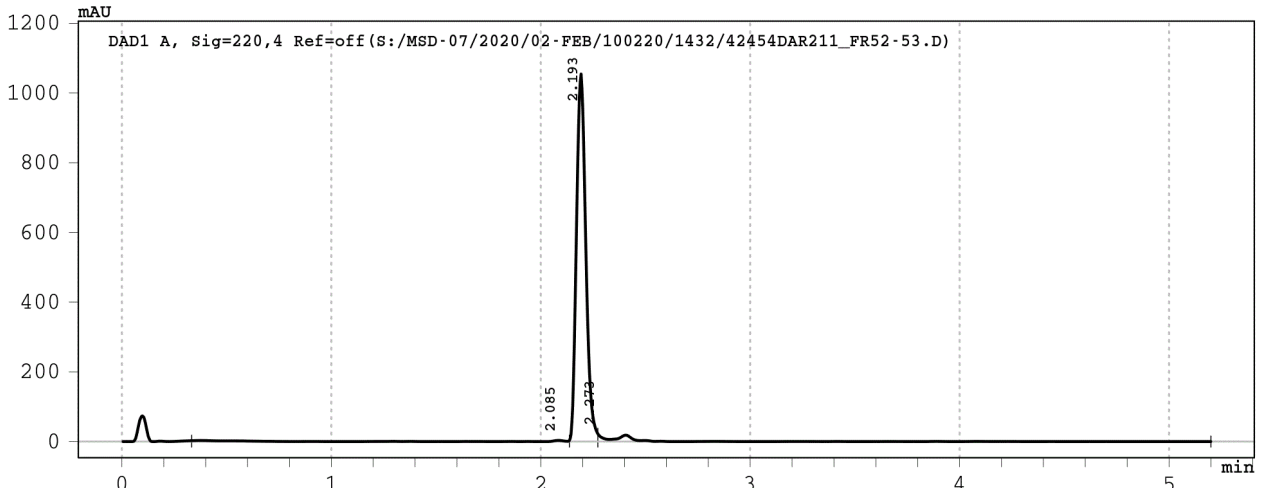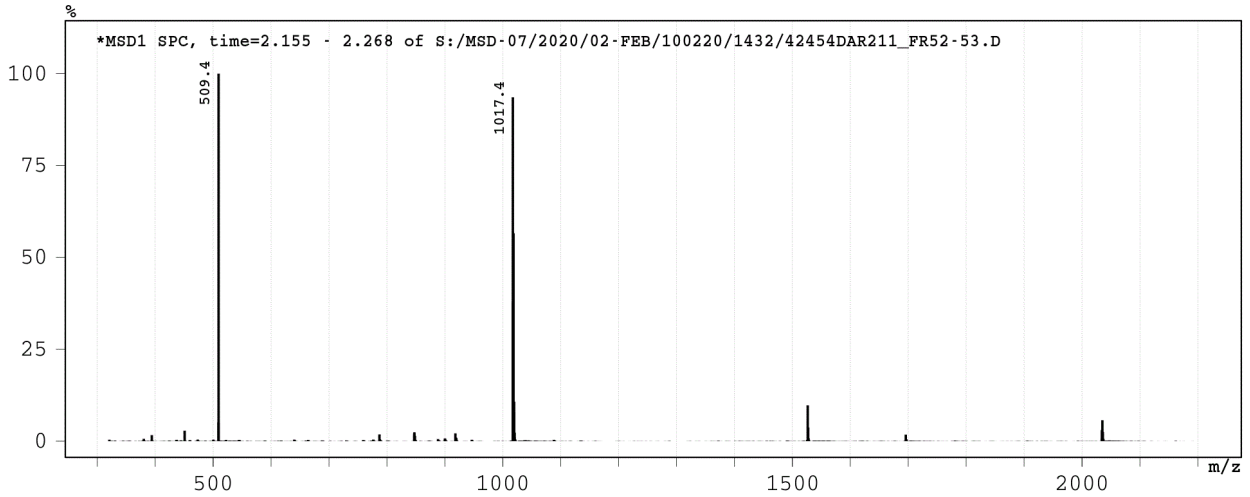

Signal 1: DAD1 A, Sig=220,4 Ref=off

| Peak # | RT [min] | Width [min] | Area   | Area % |
|--------|----------|-------------|--------|--------|
| 1      | 2.085    | 1.80        | 62.3   | 1.8    |
| 2      | 2.193    | 0.14        | 3278.7 | 94.1   |
| 3      | 2.273    | 2.93        | 141.5  | 4.1    |



Data File : S:/MSD-07/2020/02-FEB/180220/1438/42454DAR212\_FR4->  
 Injection Date : 18-Feb-20, 10:23:16  
 Sample Name : 42454DAR212\_FR48  
 Remarks : Baseline corrected  
 Acq. Method : D:/METHODS/5-95-6M.M  
 column used : Je\_559  
 Analysis Method : C:/CHEM32/1/METHODS/JPT-LCMS.M



Sample Info : 42454\_212-Dr. Martine Darwish H-QVHWFTTEL-OH

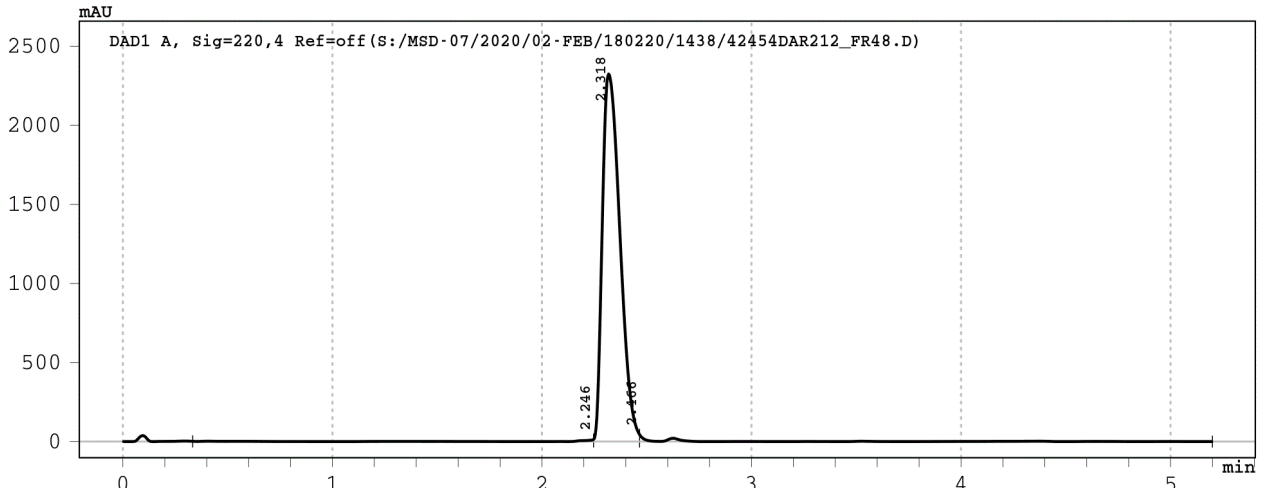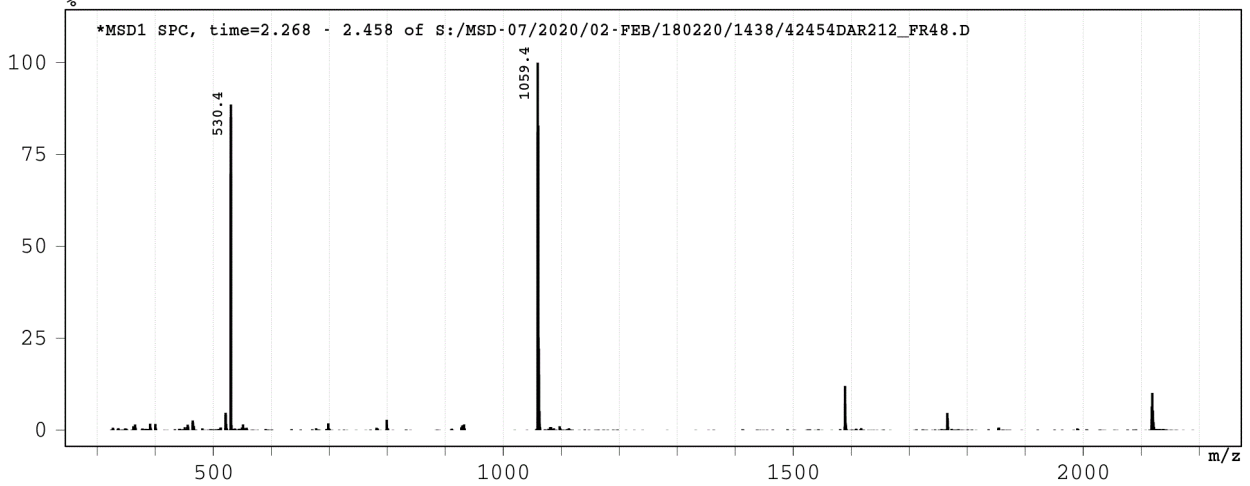

Signal 1: DAD1 A, Sig=220,4 Ref=off

| Peak # | RT [min] | Width [min] | Area    | Area % |
|--------|----------|-------------|---------|--------|
| 1      | 2.246    | 1.91        | 95.5    | 0.7    |
| 2      | 2.318    | 0.22        | 13619.7 | 97.8   |
| 3      | 2.466    | 2.73        | 206.8   | 1.5    |

Data File : S:/MSD-07/2020/02-FEB/100220/1432/42454DAR213\_FR6->  
 Injection Date : 10-Feb-20, 19:57:50  
 Sample Name : 42454DAR213\_FR61-62  
 Remarks : Baseline corrected  
 Acq. Method : D:/METHODS/5-95-6M.M  
 column used : Je\_559  
 Analysis Method : C:/CHEM32/1/METHODS/JPT-LCMS.M



Sample Info : 42454\_213-Dr. Martine Darwish H-RALSGLEPF-OH

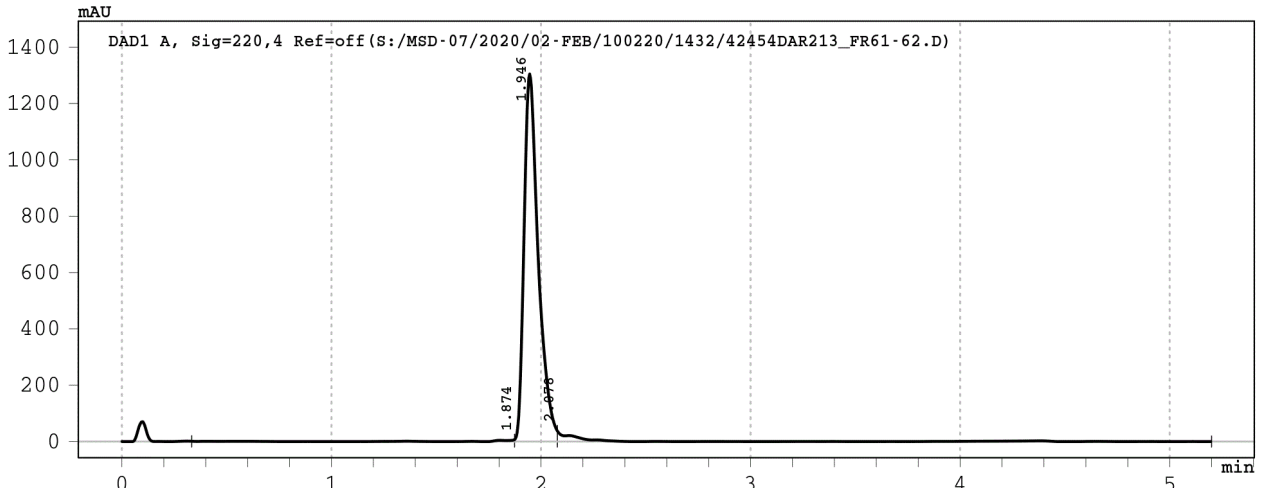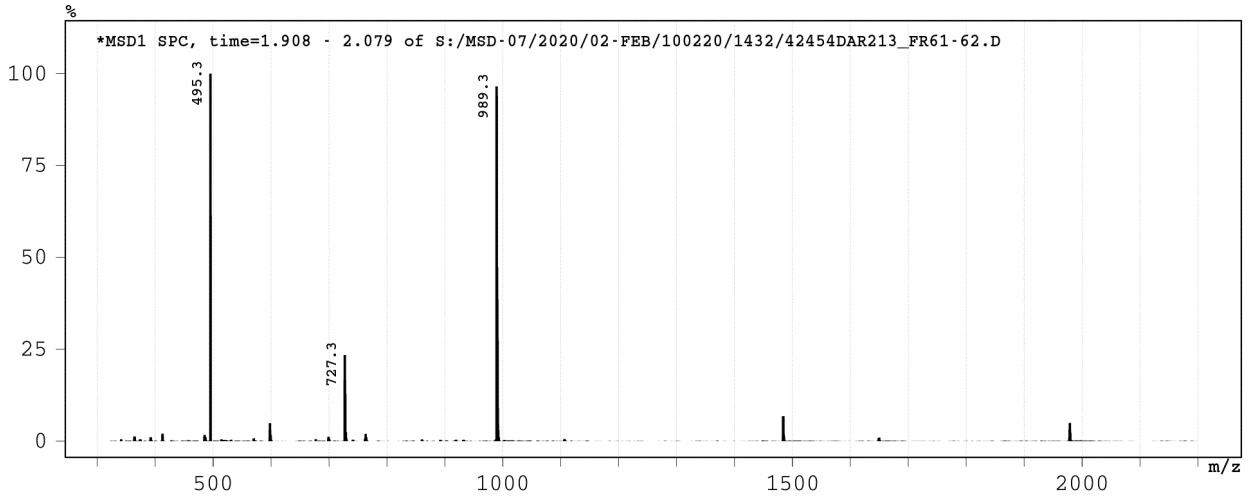

Signal 1: DAD1 A, Sig=220,4 Ref=off

| Peak # | RT [min] | Width [min] | Area   | Area % |
|--------|----------|-------------|--------|--------|
| 1      | 1.874    | 1.54        | 53.6   | 0.8    |
| 2      | 1.946    | 0.20        | 6182.7 | 95.3   |
| 3      | 2.078    | 3.12        | 252.4  | 3.9    |

Data File : S:/MSD-07/2020/02-FEB/140220/1435/42454DAR215\_FR3->



Injection Date : 15-Feb-20, 01:26:57  
Sample Name : 42454DAR215\_FR39-41  
Remarks : Baseline corrected  
Acq. Method : D:/METHODS/5-95-6M.M  
column used : Je\_559  
Analysis Method : C:/CHEM32/1/METHODS/JPT-LCMS.M

Sample Info : 42454\_215-Dr. Martine Darwish H-VSPQHRPV-OH

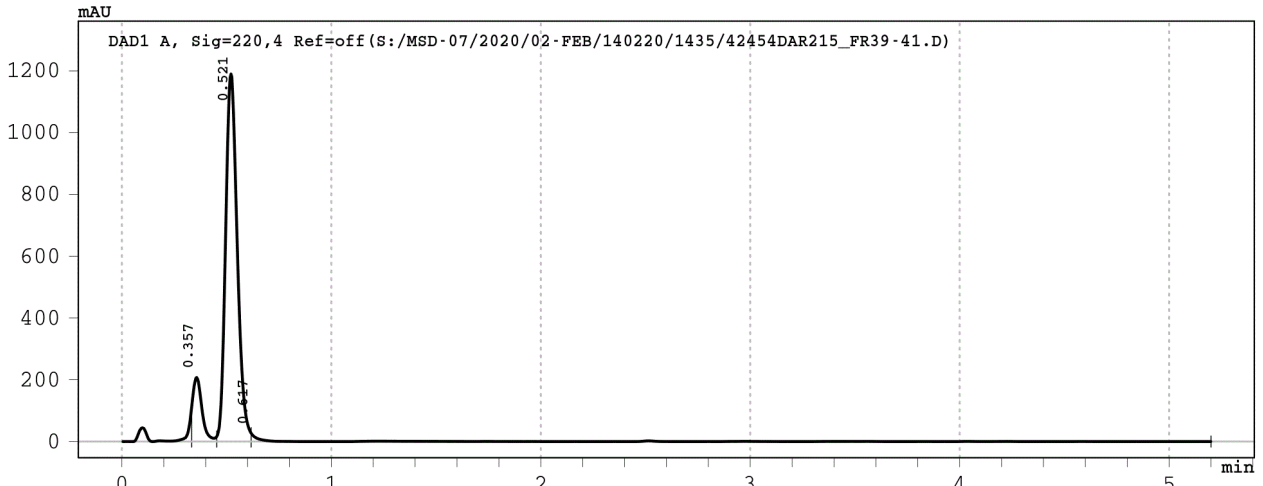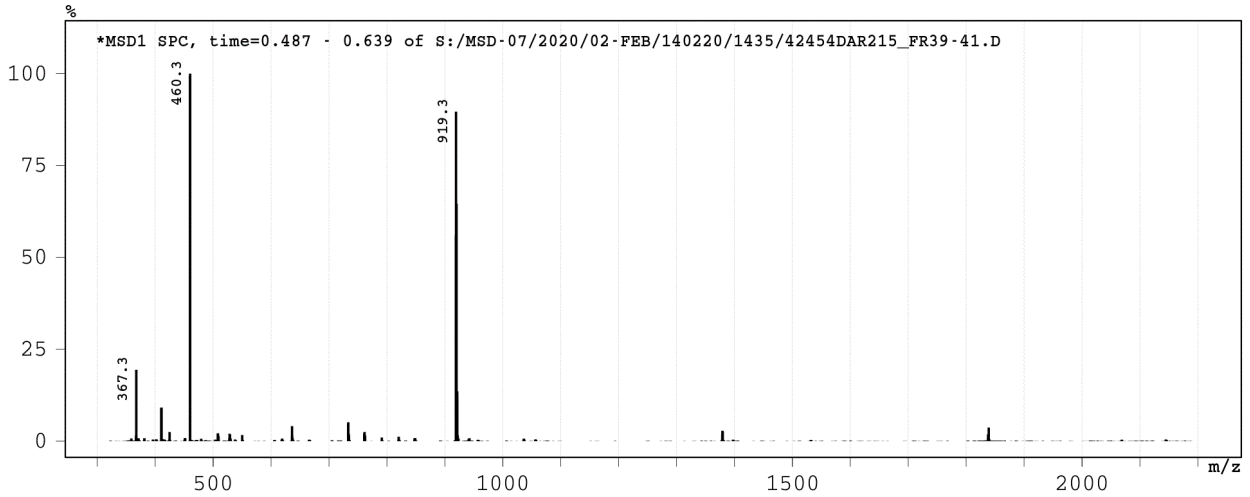

Signal 1: DAD1 A, Sig=220,4 Ref=off

| Peak # | RT [min] | Width [min] | Area   | Area % |
|--------|----------|-------------|--------|--------|
| 1      | 0.357    | 0.12        | 599.0  | 11.3   |
| 2      | 0.521    | 0.16        | 4601.4 | 86.7   |
| 3      | 0.617    | 4.58        | 106.2  | 2.0    |

Data File : S:/MSD-07/2020/02-FEB/100220/1432/42454DAR216\_FR8->  
 Injection Date : 10-Feb-20, 20:14:38  
 Sample Name : 42454DAR216\_FR80-81  
 Remarks : Baseline corrected  
 Acq. Method : D:/METHODS/5-95-6M.M  
 column used : Je\_559  
 Analysis Method : C:/CHEM32/1/METHODS/JPT-LCMS.M



Sample Info : 42454\_216-Dr. Martine Darwish H-IGDLRLATL-OH

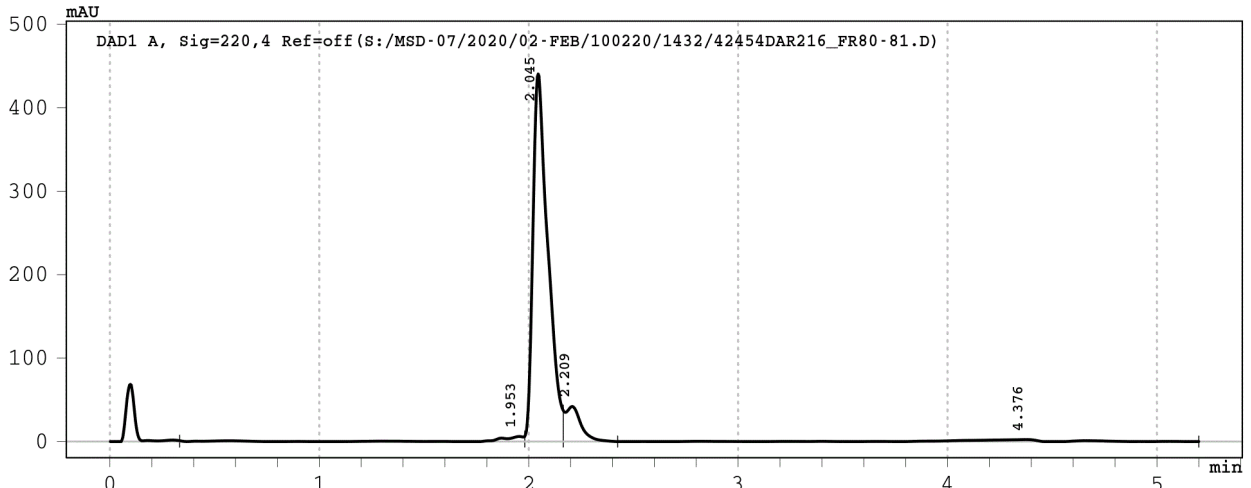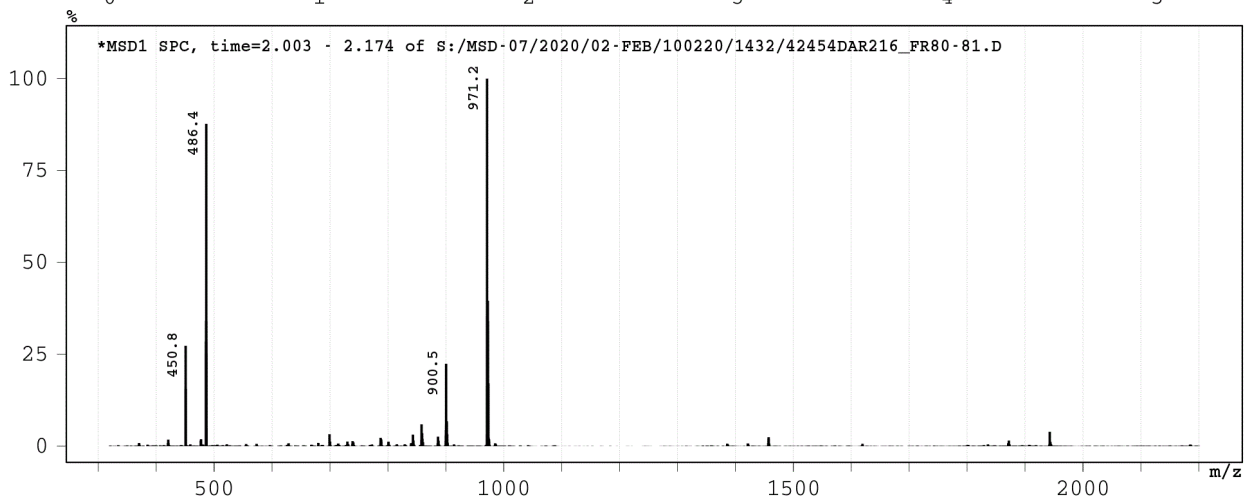

Signal 1: DAD1 A, Sig=220,4 Ref=off

| Peak # | RT [min] | Width [min] | Area   | Area % |
|--------|----------|-------------|--------|--------|
| 1      | 1.953    | 1.65        | 60.3   | 2.4    |
| 2      | 2.045    | 0.18        | 2192.8 | 86.1   |
| 3      | 2.209    | 0.26        | 225.2  | 8.8    |
| 4      | 4.376    | 2.77        | 67.1   | 2.6    |

Data File : S:/MSD-07/2020/02-FEB/100220/1432/42454DAR217\_FR1->  
 Injection Date : 10-Feb-20, 20:23:00  
 Sample Name : 42454DAR217\_FR10-11  
 Remarks : Baseline corrected  
 Acq. Method : D:/METHODS/5-95-6M.M  
 column used : Je\_559  
 Analysis Method : C:/CHEM32/1/METHODS/JPT-LCMS.M



Sample Info : 42454\_217-Dr. Martine Darwish H-LNQLYELAL-OH

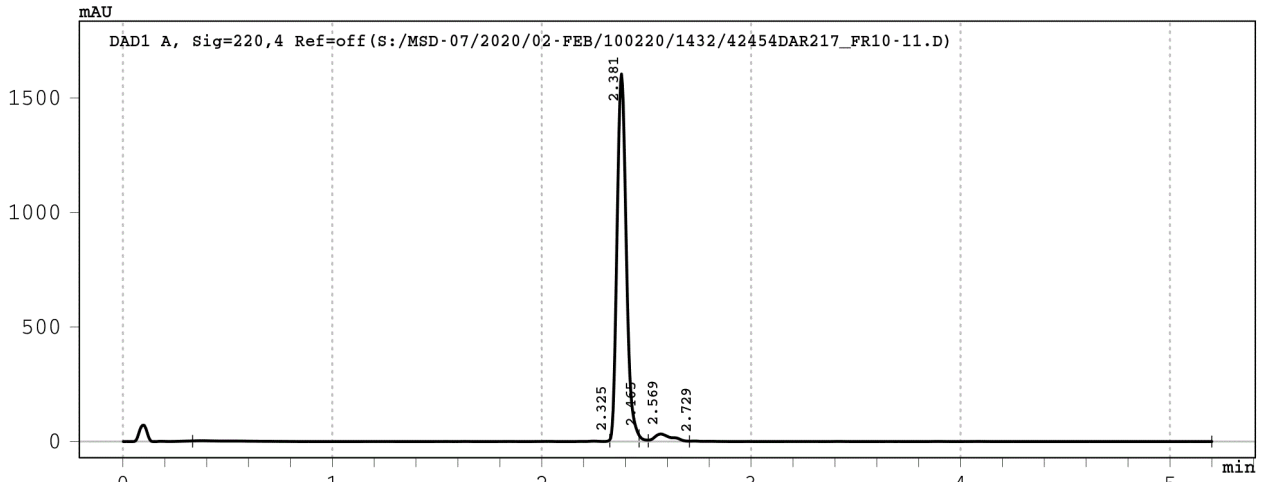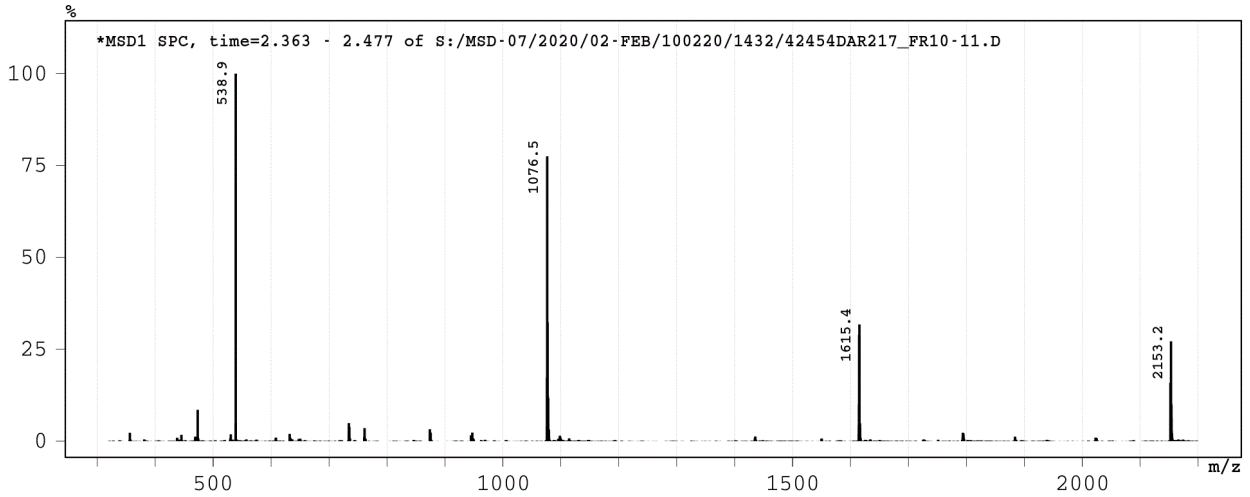

Signal 1: DAD1 A, Sig=220,4 Ref=off

| Peak # | RT [min] | Width [min] | Area   | Area % |
|--------|----------|-------------|--------|--------|
| 1      | 2.325    | 1.99        | 69.1   | 1.3    |
| 2      | 2.381    | 0.14        | 4930.9 | 94.1   |
| 3      | 2.465    | 0.04        | 30.5   | 0.6    |
| 4      | 2.569    | 0.20        | 192.4  | 3.7    |
| 5      | 2.729    | 2.50        | 18.5   | 0.4    |

Data File : S:/MSD-07/2020/02-FEB/140220/1435/42454DAR218\_FR4->



Injection Date : 15-Feb-20, 01:35:22  
Sample Name : 42454DAR218\_FR44-46  
Remarks : Baseline corrected  
Acq. Method : D:/METHODS/5-95-6M.M  
column used : Je\_559  
Analysis Method : C:/CHEM32/1/METHODS/JPT-LCMS.M

Sample Info : 42454\_218-Dr. Martine Darwish H-AVIGYSL-L-OH

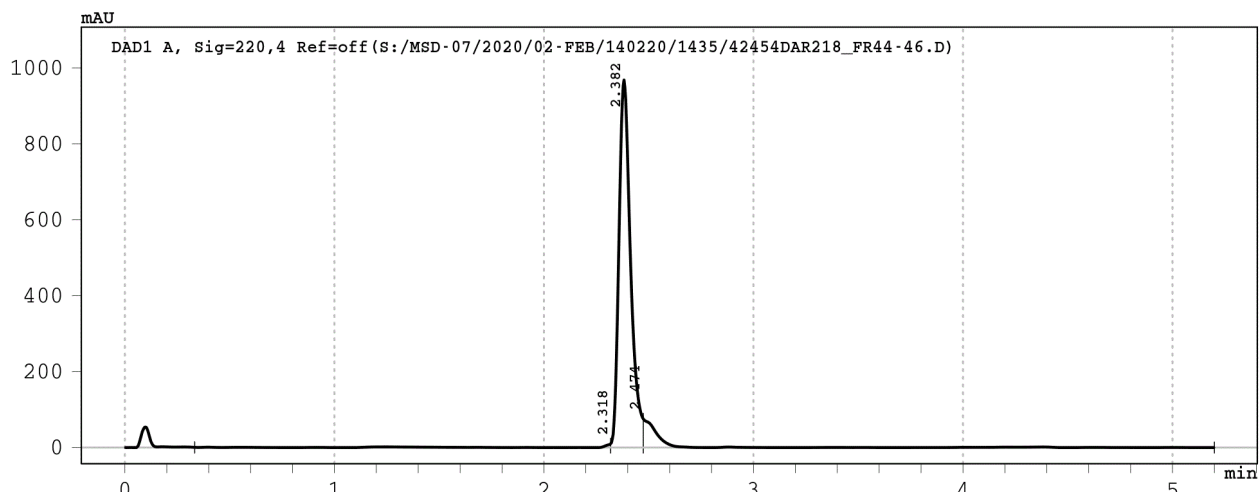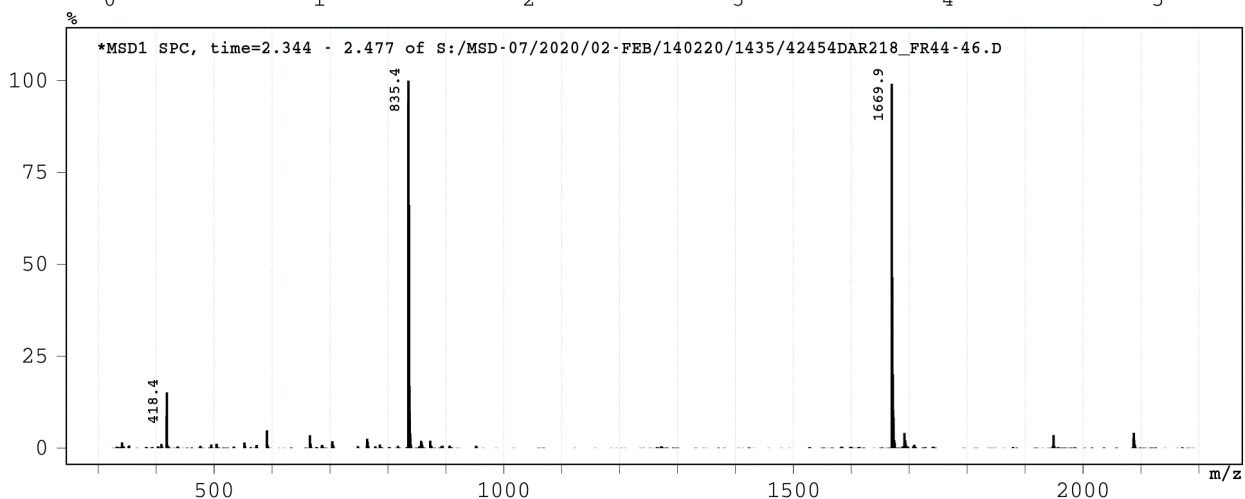

Signal 1: DAD1 A, Sig=220,4 Ref=off

| Peak # | RT [min] | Width [min] | Area   | Area % |
|--------|----------|-------------|--------|--------|
| 1      | 2.318    | 1.98        | 63.3   | 1.5    |
| 2      | 2.382    | 0.16        | 3754.1 | 89.9   |
| 3      | 2.474    | 2.73        | 357.5  | 8.6    |

Data File : S:/MSD-07/2020/02-FEB/060220/1429/42454DAR219\_FR4->  
 Injection Date : 06-Feb-20, 17:40:14  
 Sample Name : 42454DAR219\_FR45-46  
 Remarks : Baseline corrected  
 Acq. Method : D:/METHODS/5-95-6M.M  
 column used : Je\_559  
 Analysis Method : C:/CHEM32/1/METHODS/JPT-LCMS.M



Sample Info : 42454\_219-Dr. Martine Darwish H-SLLEHMSLL-OH

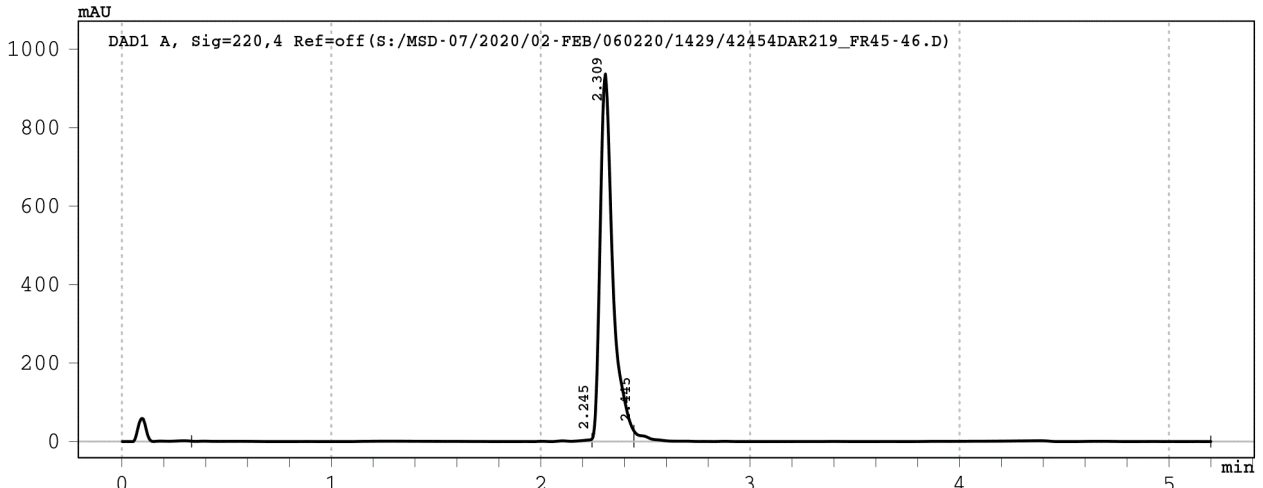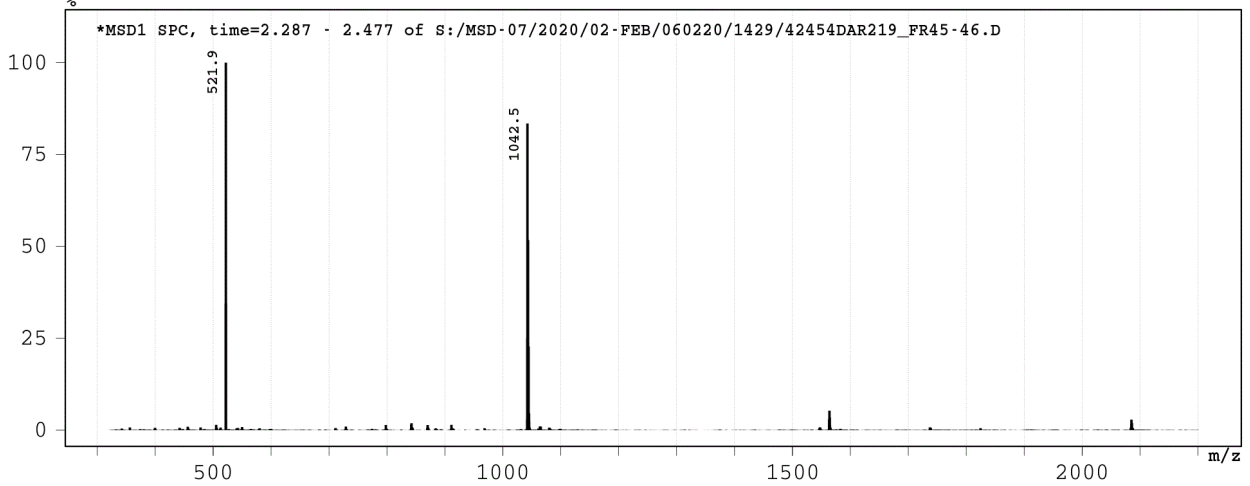

Signal 1: DAD1 A, Sig=220,4 Ref=off

| Peak # | RT [min] | Width [min] | Area   | Area % |
|--------|----------|-------------|--------|--------|
| 1      | 2.245    | 1.91        | 54.7   | 1.3    |
| 2      | 2.309    | 0.20        | 3968.3 | 95.2   |
| 3      | 2.445    | 2.76        | 146.9  | 3.5    |

Data File: S:\MSD-07\2020\02-FEB\060220\142->

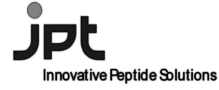

Injection Date : Thu, 6. Feb. 2020  
Sample Name : 240120SG2- 38| 42454Dar 220  
Acq Operator : SYSTEM  
Acq. Method : D:\Data\2020\02-FEB\060220\1429\5-95-6M M  
column used :  
Analysis Method : C:\Chem82\1\METHODS\DEF\_LC.M

Sample Info : 42454\_220- Dr. Martine Darwish| H-SAMAMFGYM CH

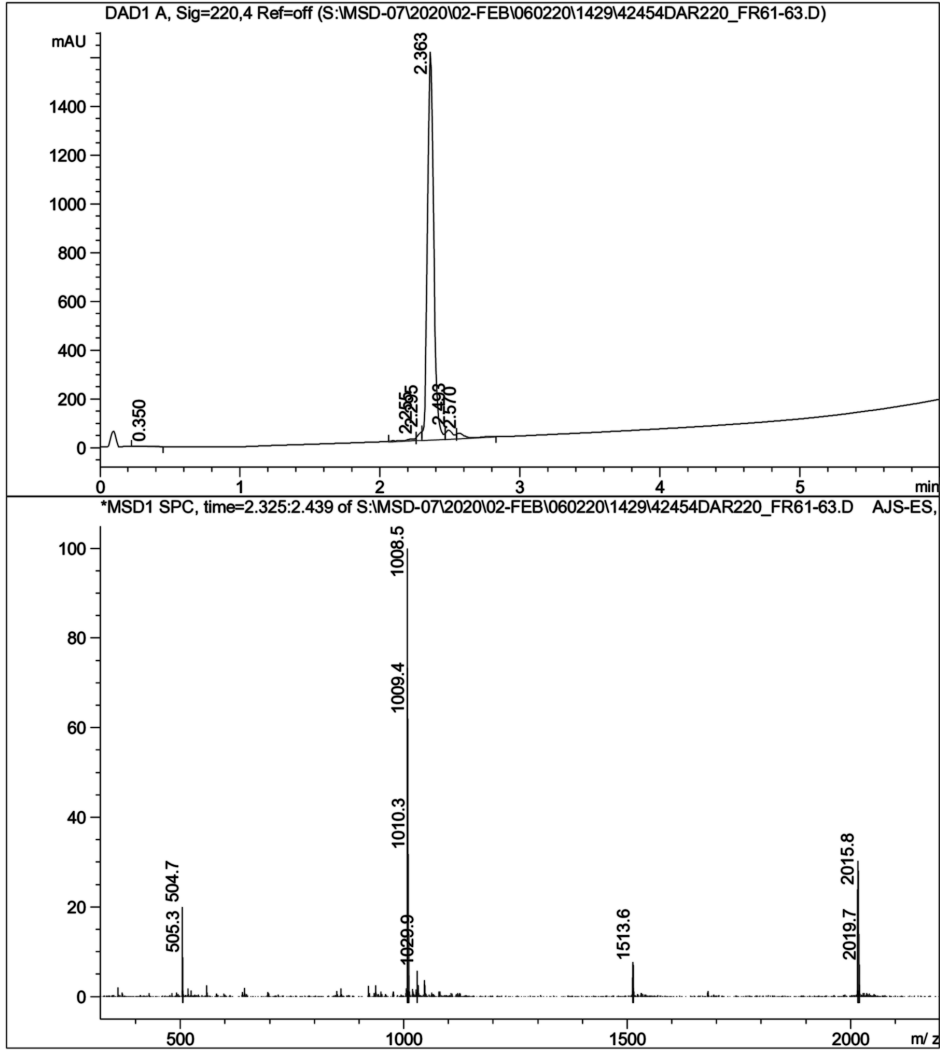

Signal 1: DAD1 A, Sig=220, 4 Ref=off

| Peak # | RT [min] | Width [min] | Area   | Area % |
|--------|----------|-------------|--------|--------|
| 1      | 0.350    | 0.1         | 7.6    | 0.1    |
| 2      | 2.255    | 0.1         | 56.7   | 1.1    |
| 3      | 2.295    | 0.0         | 65.3   | 1.2    |
| 4      | 2.363    | 0.1         | 4937.2 | 93.0   |
| 5      | 2.493    | 0.1         | 130.4  | 2.5    |
| 6      | 2.570    | 0.1         | 109.6  | 2.1    |



Data File : S:/MSD-07/2020/02-FEB/140220/1435/42454DAR221\_FR5->



Injection Date : 15-Feb-20, 01:43:45  
Sample Name : 42454DAR221\_FR50-51  
Remarks : Baseline corrected  
Acq. Method : D:/METHODS/5-95-6M.M  
column used : Je\_559  
Analysis Method : C:/CHEM32/1/METHODS/JPT-LCMS.M

Sample Info : 42454\_221-Dr. Martine Darwish H-LQFIQSPL-OH

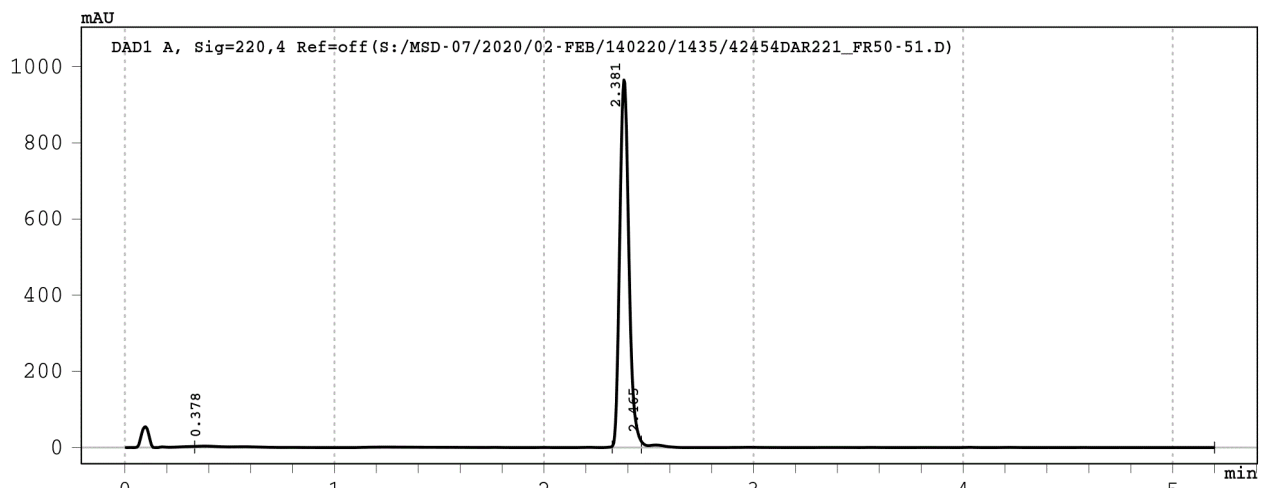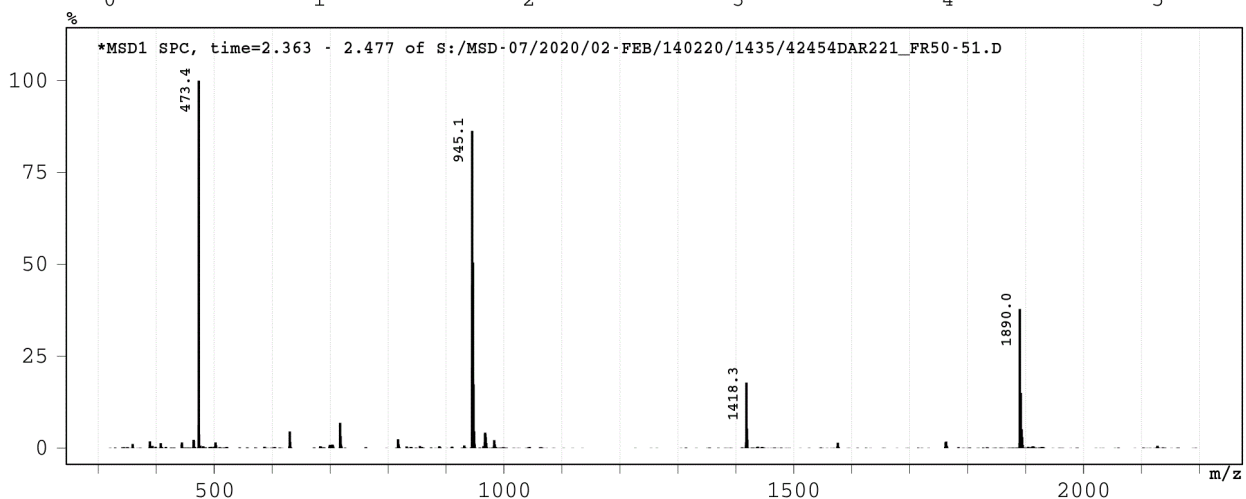

Signal 1: DAD1 A, Sig=220,4 Ref=off

| Peak # | RT [min] | Width [min] | Area   | Area % |
|--------|----------|-------------|--------|--------|
| 1      | 0.378    | 1.99        | 82.0   | 2.7    |
| 2      | 2.381    | 0.14        | 2946.0 | 95.4   |
| 3      | 2.465    | 2.73        | 61.2   | 2.0    |

Data File : S:/MSD-07/2020/02-FEB/100220/1432/42454DAR222\_FR2 ->



Injection Date : 10-Feb-20, 20:31:23  
Sample Name : 42454DAR222\_FR20-21  
Remarks : Baseline corrected  
Acq. Method : D:/METHODS/5-95-6M.M  
column used : Je\_559  
Analysis Method : C:/CHEM32/1/METHODS/JPT-LCMS.M

Sample Info : 42454\_222-Dr. Martine Darwish H-IIAVLKQRL-OH

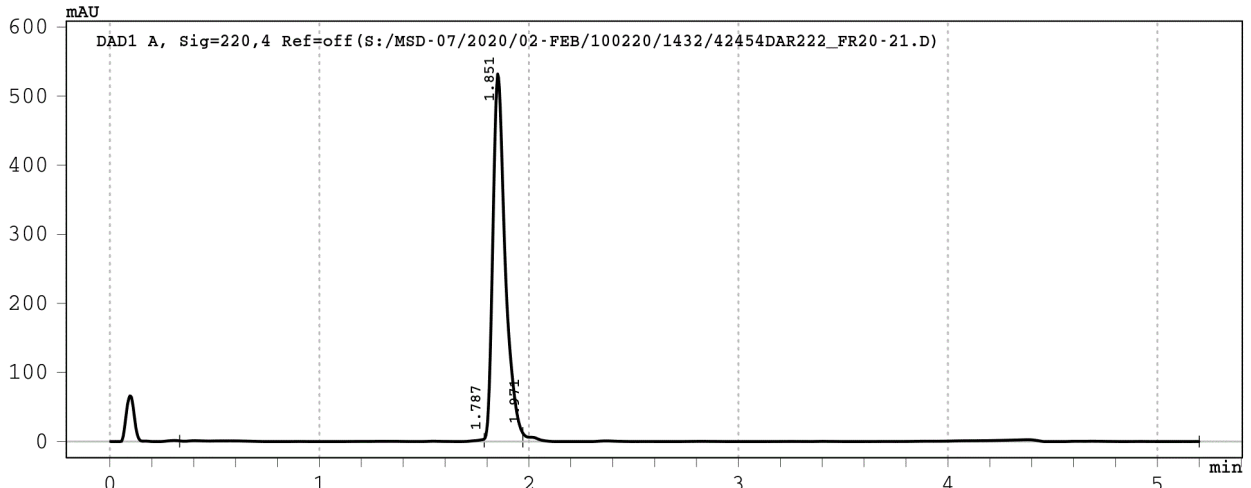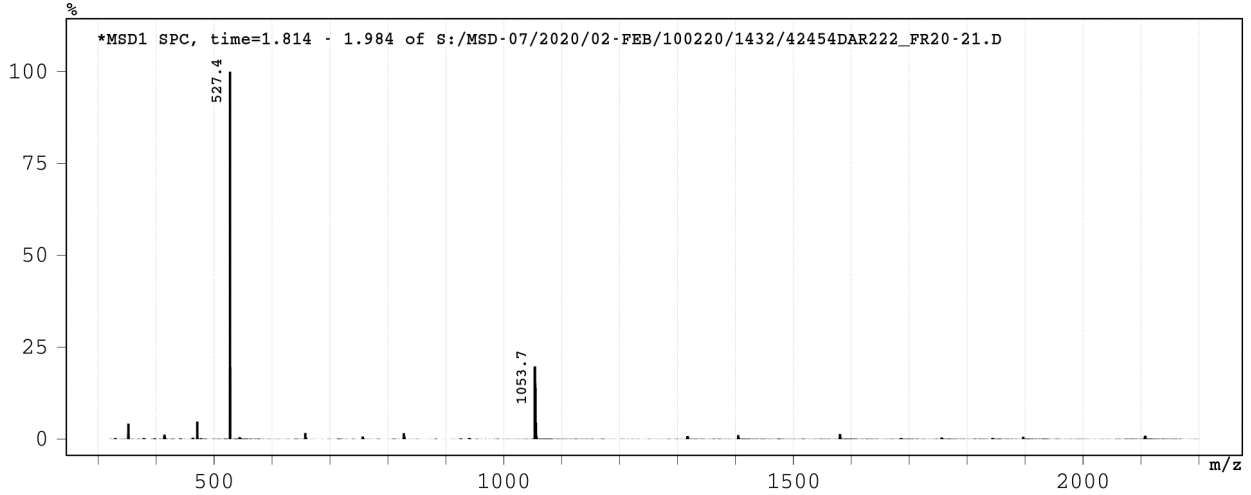

Signal 1: DAD1 A, Sig=220,4 Ref=off

| Peak # | RT [min] | Width [min] | Area   | Area % |
|--------|----------|-------------|--------|--------|
| 1      | 1.787    | 1.45        | 32.1   | 1.4    |
| 2      | 1.851    | 0.18        | 2187.3 | 94.5   |
| 3      | 1.971    | 3.23        | 96.3   | 4.2    |

Data File : S:/MSD-07/2020/02-FEB/060220/1429/42454DAR223\_FR7->  
 Injection Date : 06-Feb-20, 17:57:01  
 Sample Name : 42454DAR223\_FR77-78  
 Remarks : Baseline corrected  
 Acq. Method : D:/METHODS/5-95-6M.M  
 column used : Je\_559  
 Analysis Method : C:/CHEM32/1/METHODS/JPT-LCMS.M



Sample Info : 42454\_223-Dr. Martine Darwish H-RGFMWLPGF-OH

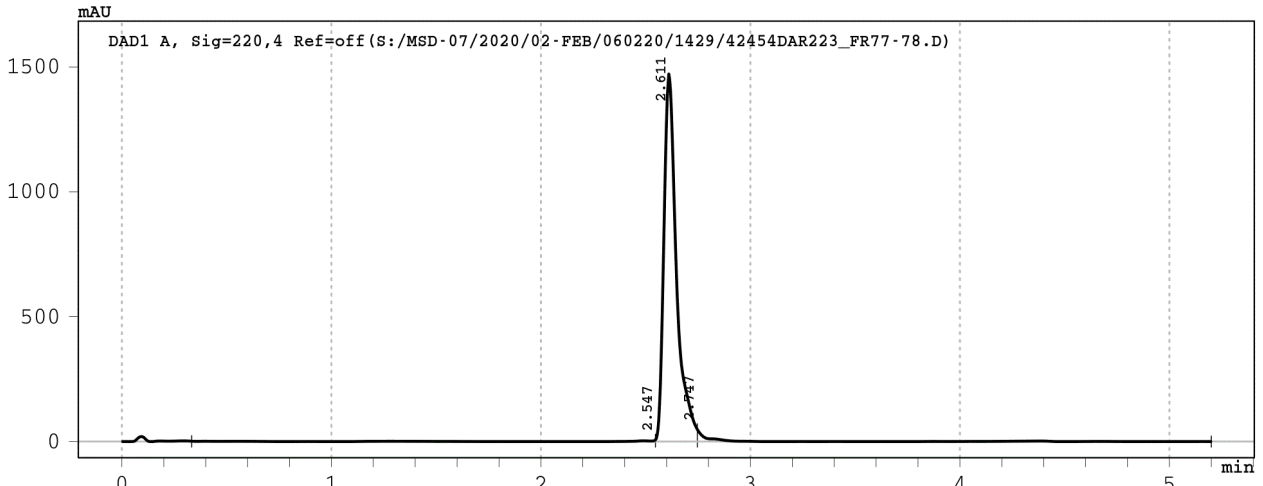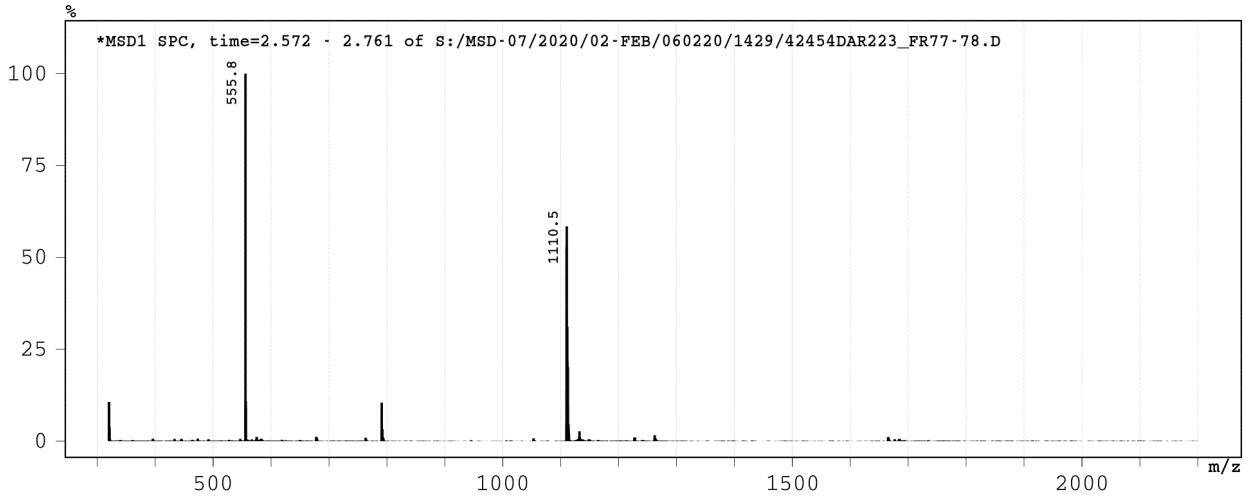

Signal 1: DAD1 A, Sig=220,4 Ref=off

| Peak # | RT [min] | Width [min] | Area   | Area % |
|--------|----------|-------------|--------|--------|
| 1      | 2.547    | 2.21        | 63.5   | 1.0    |
| 2      | 2.611    | 0.20        | 6164.8 | 96.3   |
| 3      | 2.747    | 2.45        | 172.2  | 2.7    |

Data File : S:/MSD-07/2020/02-FEB/140220/1435/42454DAR224\_FR5->



Injection Date : 15-Feb-20, 01:52:08  
Sample Name : 42454DAR224\_FR54-56  
Remarks : Baseline corrected  
Acq. Method : D:/METHODS/5-95-6M.M  
column used : Je\_559  
Analysis Method : C:/CHEM32/1/METHODS/JPT-LCMS.M

Sample Info : 42454\_224-Dr. Martine Darwish H-SNHVLGHL-OH

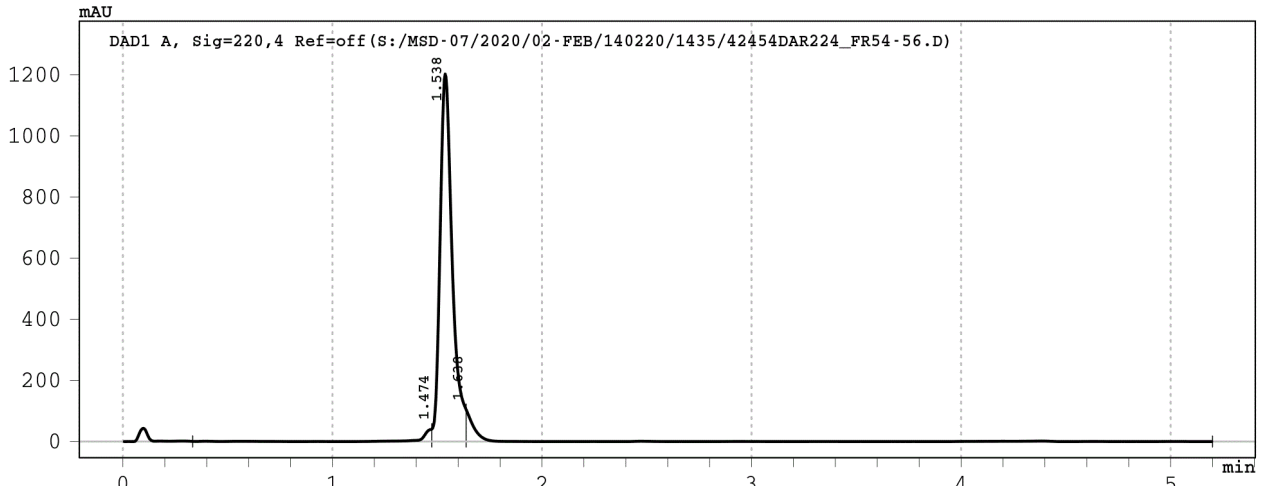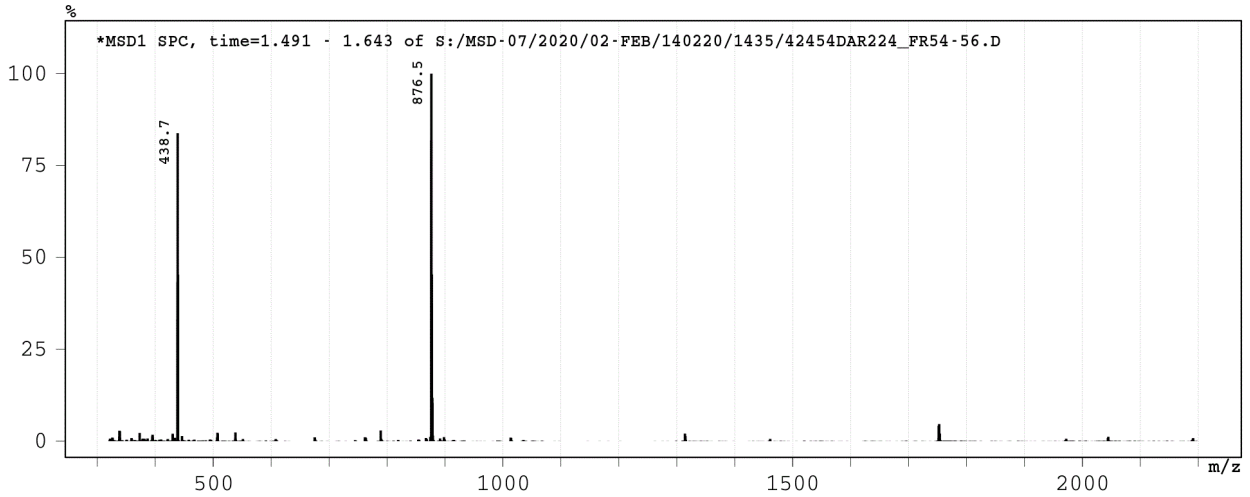

Signal 1: DAD1 A, Sig=220,4 Ref=off

| Peak # | RT [min] | Width [min] | Area   | Area % |
|--------|----------|-------------|--------|--------|
| 1      | 1.474    | 1.14        | 127.1  | 2.4    |
| 2      | 1.538    | 0.16        | 4874.3 | 92.1   |
| 3      | 1.638    | 3.56        | 293.4  | 5.5    |

Data File : S:/MSD-07/2020/02-FEB/060220/1429/42454DAR225\_FR9->



Injection Date : 06-Feb-20, 18:05:25  
Sample Name : 42454DAR225\_FR9-10  
Remarks : Baseline corrected  
Acq. Method : D:/METHODS/5-95-6M.M  
column used : Je\_559  
Analysis Method : C:/CHEM32/1/METHODS/JPT-LCMS.M

Sample Info : 42454\_225-Dr. Martine Darwish H-LMLENYNNL-OH

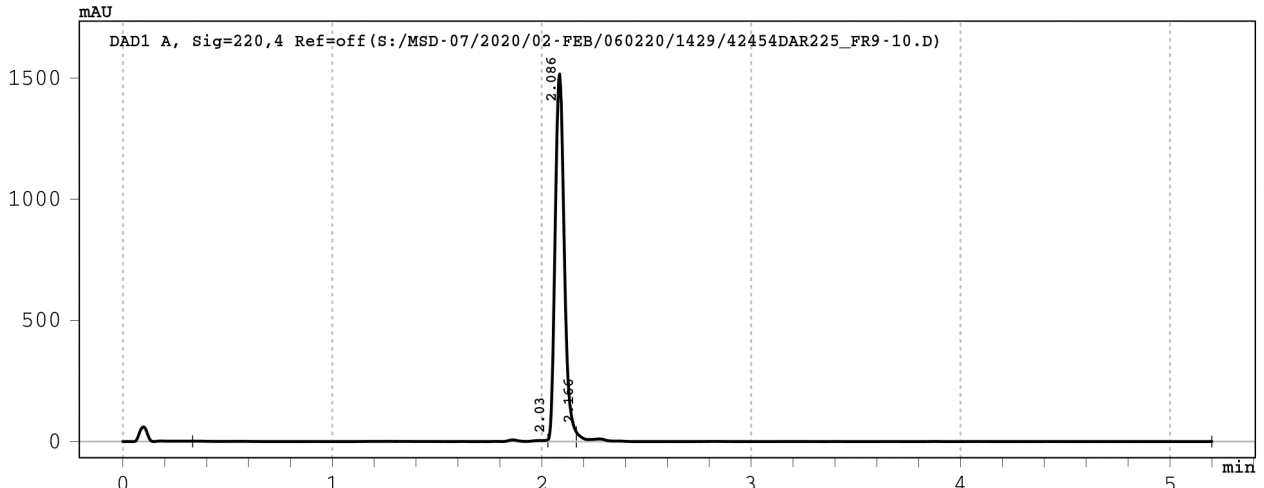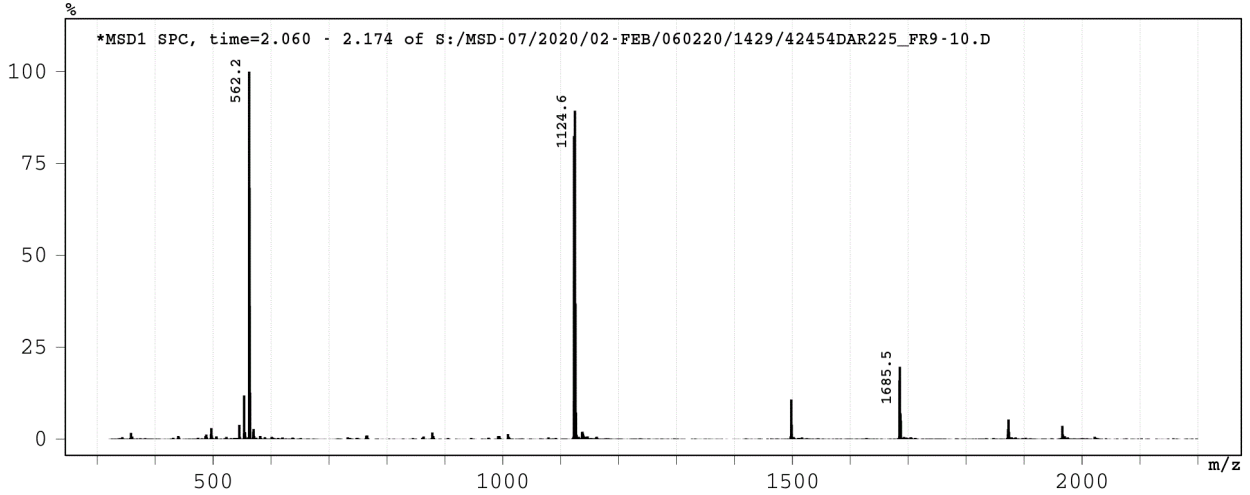

Signal 1: DAD1 A, Sig=220,4 Ref=off

| Peak # | RT [min] | Width [min] | Area   | Area % |
|--------|----------|-------------|--------|--------|
| 1      | 2.030    | 1.70        | 70.1   | 1.5    |
| 2      | 2.086    | 0.14        | 4612.0 | 95.8   |
| 3      | 2.166    | 3.03        | 130.6  | 2.7    |

Data File : S:/MSD-07/2020/02-FEB/100220/1432/42454DAR226\_FR2 ->  
 Injection Date : 10-Feb-20, 20:39:45  
 Sample Name : 42454DAR226\_FR26-27  
 Remarks : Baseline corrected  
 Acq. Method : D:/METHODS/5-95-6M.M  
 column used : Je\_559  
 Analysis Method : C:/CHEM32/1/METHODS/JPT-LCMS.M



Sample Info : 42454\_226-Dr. Martine Darwish H-KSFRQKPNL-OH

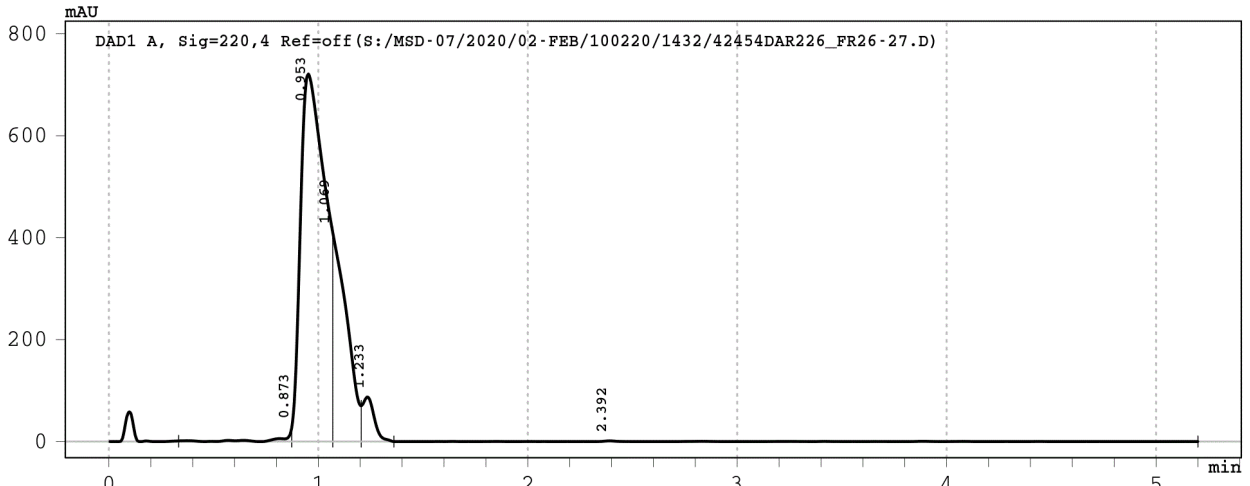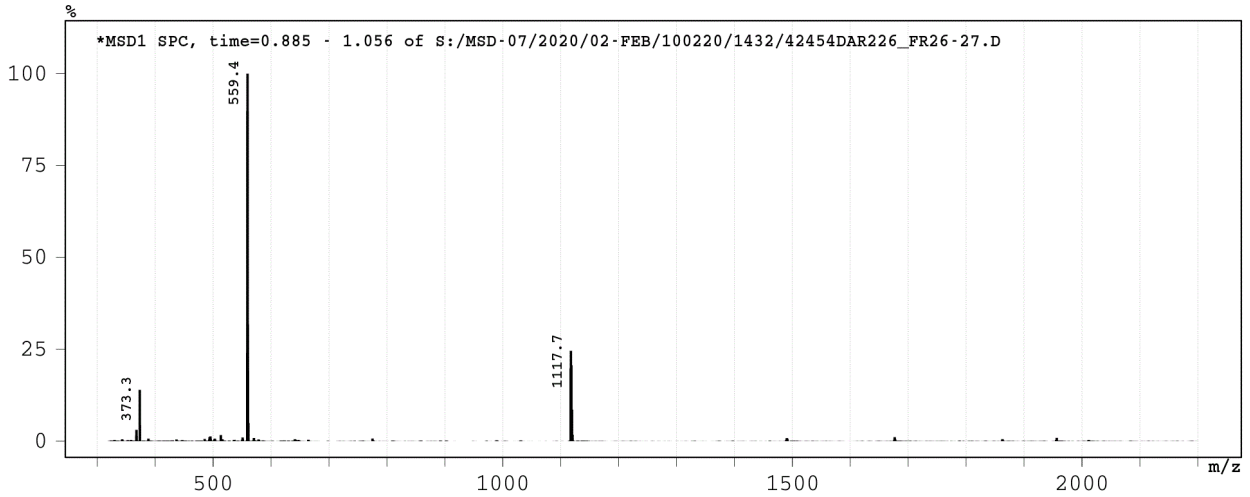

Signal 1: DAD1 A, Sig=220,4 Ref=off

| Peak # | RT [min] | Width [min] | Area   | Area % |
|--------|----------|-------------|--------|--------|
| 1      | 0.873    | 0.54        | 68.9   | 0.8    |
| 2      | 0.953    | 0.20        | 5864.3 | 71.4   |
| 3      | 1.069    | 0.14        | 1921.7 | 23.4   |
| 4      | 1.233    | 0.16        | 343.8  | 4.2    |
| 5      | 2.392    | 3.84        | 16.1   | 0.2    |

Data File : S:/MSD-07/2020/02-FEB/060220/1429/42454DAR227\_FR1->  
 Injection Date : 06-Feb-20, 18:13:48  
 Sample Name : 42454DAR227\_FR17  
 Remarks : Baseline corrected  
 Acq. Method : D:/METHODS/5-95-6M.M  
 column used : Je\_559  
 Analysis Method : C:/CHEM32/1/METHODS/JPT-LCMS.M



Sample Info : 42454\_227-Dr. Martine Darwish H-ASACNVQHL-OH

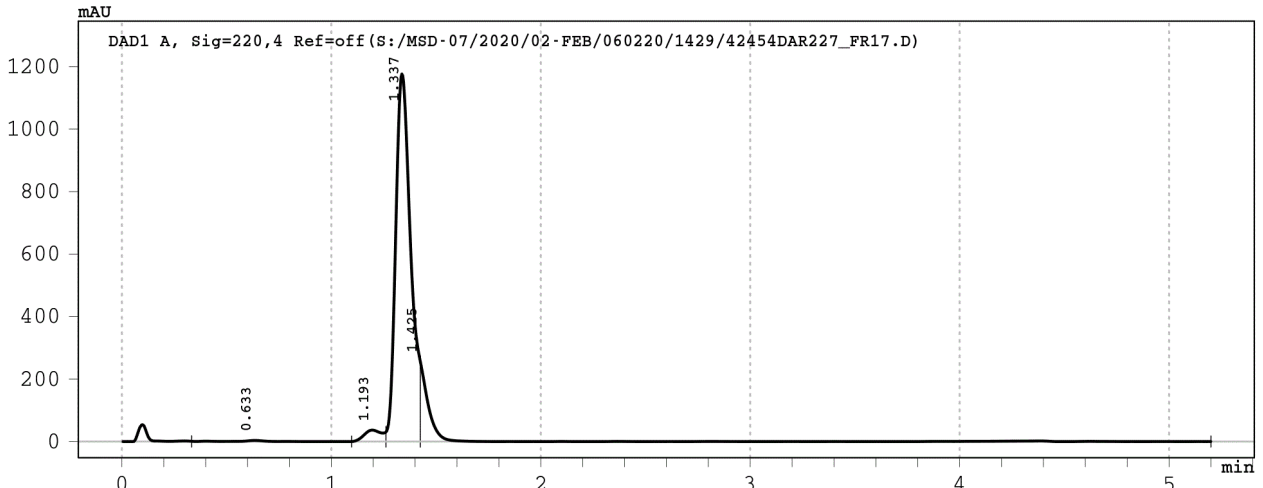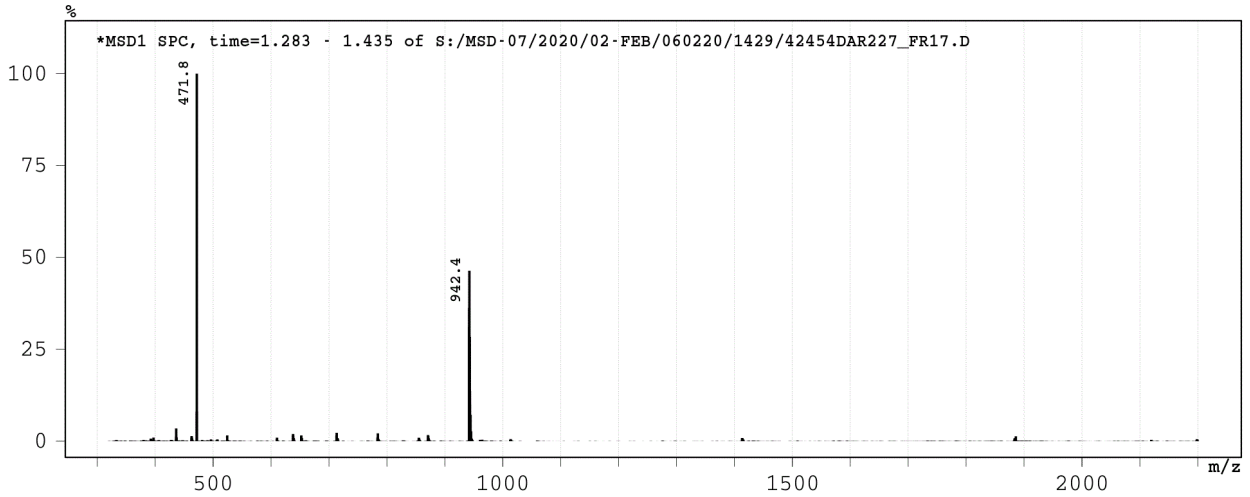

Signal 1: DAD1 A, Sig=220,4 Ref=off

| Peak # | RT [min] | Width [min] | Area   | Area % |
|--------|----------|-------------|--------|--------|
| 1      | 0.633    | 0.76        | 29.0   | 0.4    |
| 2      | 1.193    | 0.16        | 220.6  | 3.2    |
| 3      | 1.337    | 0.16        | 5840.4 | 85.9   |
| 4      | 1.425    | 3.78        | 710.8  | 10.5   |
